# Supplementary material for: Pan-cancer analysis reveals potential immunological and prognostic roles of METTL7A in human cancers
Source: Sci Rep. 2024 Feb 12;14:3476. doi: 10.1038/s41598-024-54255-x (PMC10859372; doi:10.1038/s41598-024-54255-x)
Supplement: Supplementary file 1 — Supplementary Tables. [file 41598_2024_54255_MOESM1_ESM.xlsx]

## Sheet: Table S1 Expression matrix
	AD001	AD002	AD003	AD004	AD005	AD006	AD007	AD008	AD009	AD010	AD011	AD012	AD013	AD014	AD015	AD016	AD018	AD019	AD020	AD021	AD023	AD024	AD025	AD026	AD027	AD029	AD030	AD031	AD032	AD033	AD034	AD035	AD036	AD037	AD038	AD039	AD040	AD041	AD042	AD043	AD044	AD045	AD046	AD047	AD048	AD049	AD050	AD051	AD052
LOC400451	0.434	1.3516	-1.3959	-0.462	-0.4403	-0.7784	0.9848	1.0257	-0.0203	0.0243	0.7485	0.2091	-0.2688	0.1283	-0.364	-2.5564	0.1017	0.7621	-1.1877	0.0328	1.3004	-0.5064	-0.0939	0.103	-0.8262	-1.0985	-0.5332	0.6871	-1.041	0.8416	-1.1943	1.0454	0.4233	0.3127	-0.7298	1.2869	-0.1926	-0.4228	-1.0262	-1.3328	-0.5064	-0.8783	-0.364	0.3092	0.2798	-0.9914	-0.4739	-0.7588	-1.0233
AP3S2	-1.1297	-1.3921	-2.9324	-1.8783	-2.4189	-2.4422	-2.7859	-2.458	-1.5995	-2.6712	-2.1584	-1.6126	-3.3408	-3.6367	-3.0469	-2.4035	-1.889	-2.0116	-3.5513	-4.354	-0.685	-1.2584	-3.8262	-1.035	-1.9214	-1.4383	-2.9434	-3.035	-2.6712	-1.0439	-2.3808	-2.041	-0.6016	-2.152	-2.737	-2.1078	-1.9214	-3.9018	-2.6171	-2.1649	-2.4422	-2.5735	-2.2176	-1.454	-2.776	-1.771	-2.3004	-2.9214	-3.2934
SV2B	-4.0023	-4.5064	-4.5907	-4.0565	-4.4643	-4.2189	-3.6529	-3.8365	-3.9148	-3.2934	-3.6547	-4.9346	-4.3393	-3.3511	-2.9214	-3.8283	-4.2934	-4.2709	-3.9546	-4.0856	-4.436	-3.2653	-4.2216	-3.6897	-3.4965	-4.2962	-4.1304	-4.7879	-3.3674	-3.9062	-4.2216	-4.5735	-4.553	-4.9434	-2.6712	-3.816	-3.6511	-3.7486	-3.9434	-3.7046	-4.1714	-3.4097	-3.071	-3.1078	-4.2029	-4.9703	-4.227	-3.2934	-3.5362
RBPMS2	-0.6304	-2.7661	-1.5951	-0.6439	-0.4639	-0.2863	-3.7544	-2.3511	-2.3884	-2.5735	-3.3688	-0.9078	-2.4035	-1.3183	-2.3147	-4.0856	-2.1584	-0.776	-1.4941	-2.5649	-3.3076	-1.9658	0.1401	-3	-3.816	-2.4422	-0.2706	-3.071	-2.1078	-2.9105	-1.6529	-0.5291	-4.6657	-5.6511	-2.2793	-3.1844	-1.7909	-2.889	-3.3823	-3.4901	-2.8468	-2.5395	-2.3585	-3.7681	-2.737	-3.1714	-1.5023	-1.4228	-1.9771
AVEN	0.148	-0.0218	-0.364	-0.9743	-0.6529	-0.6574	-1.1584	-0.5064	-1.1681	-0.7298	-0.6643	-0.816	-1.5606	-0.0277	-0.4501	-0.0847	-0.7934	-0.482	-0.6304	-0.7274	-0.2379	0.4071	-0.1187	-1.2413	-0.7563	-0.2379	0.0663	-0.7515	-0.9241	-0.725	0.4297	-0.6416	-1.3255	-1.2243	-0.8211	-1.1047	-0.4699	-1.2934	-0.811	-0.567	0.4977	-0.1665	-0.3846	-1.2311	-1.304	-0.8997	-0.0014	-0.191	0.251
ZNF690	-0.3094	0.275	-0.221	0.1493	0.542	-0.5692	-0.6349	0.0257	-0.5585	-0.3383	-0.567	0.4636	-0.2379	0.3516	-0.0262	-0.0862	-1.415	-0.1376	-0.486	-0.3603	0.037	0.1137	0.3288	-0.2092	-1.1329	0.2928	-0.7084	-0.5585	-0.2934	-0.6484	-0.4266	0.0272	-0.2379	-1.0499	-0.4501	-0.3566	-0.2653	0.9797	-0.1959	0.1124	0.6844	0.8883	-0.2636	-0.2636	-1.0954	0.0172	0.2798	0.4038	0.3022
VPS39	-0.3201	-0.2481	-0.5564	-0.221	-0.191	-0.8573	-0.1456	0.0868	-0.3237	-0.6237	-0.6038	-0.0439	-0.5064	0.1519	0.1084	0.8416	-1.2176	-0.5166	0.3482	-0.0454	-0.5002	0.7022	-0.4779	-0.1313	-0.6349	-0.7959	-0.488	0.2079	-0.2328	0.0936	0.5869	-0.3022	0.0286	-3.1203	-0.458	-0.3529	-0.1282	0.0496	-1.2619	-0.8009	-0.2142	-0.7612	-1.5146	0.1596	-0.4055	0.257	-0.097	-0.4266	-0.3383
CHP	-0.737	-0.1976	-0.8262	-0.4461	-0.2159	-1.3997	-0.8468	0.4751	-0.5951	-0.4982	0.4803	-1.038	-0.9771	-0.2934	-0.5649	0.175	-0.7013	-0.7959	-1.038	-1.5023	0.3391	0.2666	-1.0529	-0.3474	-0.889	-0.6215	-0.1125	0.6012	-1.4112	0.2975	-0.1361	-0.8034	0.0342	-0.6104	-1.4422	-0.2706	-1.7859	-0.9856	0.1506	0.2642	0.4542	-0.2092	0.4319	-0.3997	-0.6873	-0.6735	0.5984	-0.8365	-0.6804
CASC5	-1.9159	-3.9083	-2.035	-1.2793	-1.5522	-0.5166	-2.816	-3.1203	-2.114	-4.2488	-2.889	-0.6282	-2.6439	-1.5778	-2.6349	-0.1488	-3.7879	-0.3255	-2.1016	-2.152	-3.2793	-3.4485	-0.6873	-5.2934	-3.2934	-1.5649	-0.4093	-2.7179	-1.4344	-4.6475	-1.074	-4.1103	-3.9148	-2.191	-3.4391	-3.8997	-2.3808	-2.2934	-2.5564	-1.4501	-1.3771	-0.8757	-2.5649	-3.7447	-3.9546	-1.1844	-2.1779	-1.4189	-2.1779
ASCIZ	0.0043	0.7966	0.1596	0.0043	1.2833	-0.3456	-0.3566	0.3426	-0.274	0.1903	0.8392	-0.0574	-0.3437	0.3818	0.4415	0.0496	0.4436	-0.1536	-0.5208	0.2857	0.1878	-0.0816	-1.1424	0.1043	-0.1047	0.6257	0.606	1.5612	-0.5756	0.2091	0.1309	1.1667	0.2363	-0.4266	0.4027	0.3663	-0.0233	0.229	0.8123	1.08	1.4859	1.4265	0.9767	-0.3808	1.46	0.4823	0.4678	0.3482	1.1303
C16orf28	-1.1266	-0.1959	-1.0831	-0.9462	-0.6282	-0.6038	0.3584	-0.9024	-0.071	-0.706	-0.5291	-0.3677	-0.8863	-0.1392	-1.0831	-1.6304	-0.4679	-0.9743	-0.4961	-0.1234	-0.3978	-0.8443	-1.5187	-0.9434	-0.8943	-1.221	-0.9518	-0.7131	-1.1297	-0.6038	-0.6827	-0.3183	-0.4055	-0.3715	-0.482	-0.8034	-0.949	-0.9434	-1.1047	-0.6484	-0.3566	-0.7394	-0.3292	-0.4055	-0.7612	-0.889	-0.0725	-0.281	-0.8757
TMEM127	0.0676	-0.4461	-0.48	-0.0939	-1.152	-0.9856	-0.8599	-0.3364	0.0468	-1.077	-0.5374	-0.2636	-0.7179	-0.7322	-0.4422	-1.1078	0.1827	-0.331	-0.9602	-0.6461	-0.8757	-0.3419	-0.3328	-0.7394	-0.7346	-1.0801	-1.3548	-0.9296	-0.7466	0.473	-1.1617	-0.5125	-0.2706	-1	-1.3808	-0.4442	0.1814	-1.3474	-0.8468	-0.3884	-1.0499	-1.3474	-1.152	-0.8186	-0.2845	-0.1047	-1.3511	-1.1746	-1.2076
MMP15	-0.1062	0.2642	3.591	1.5792	2.7472	0.3092	-0.1926	0.9222	1.0072	0.52	1.5646	1.1814	0.0342	-0.3677	-0.8599	0.7172	0.9146	-0.9434	0.3033	0.3763	2.5122	0.763	2.2603	1.7702	1.175	1.6135	1.8675	2.1424	-0.3383	1.6663	-0.8417	1.844	2.5695	2.3547	0.9351	2.0766	0.2079	0.4782	2.3254	0.9321	1.5286	1.0854	2.5646	1.905	3.0736	0.9419	1.3511	-0.0589	0.0895
PRM1	-0.5799	-0.7612	-1.3846	-0.8314	-0.6597	-0.1943	-0.1746	-1.0439	-0.5187	-0.0029	0.1903	-0.5778	-0.6897	-1.221	-1.3076	0.0949	-1.5479	-0.9885	-0.4901	0.1401	-0.2413	-0.9187	0.4394	-1.2688	-2.0649	-0.6038	0.6003	0.6388	NA	-0.897	-0.1156	-0.9214	-0.1714	-0.9078	-0.9159	-0.2109	-0.6461	-1.077	-1.0831	-0.6506	-0.5395	-0.1078	-1.7959	-0.8365	0.099	-0.5479	0.3115	-0.9214	-0.2969
USP10	-1.1844	-0.9214	-0.873	-0.6304	-0.6171	-1.1649	-1.2243	-1.304	-1.2934	-1.6126	-0.9574	-1.6804	-1.0291	-1.0619	-1.2863	-1.2176	-1.0893	-0.9942	-0.9269	-1.0954	-1.2828	-1.3585	-1.2311	-1.1488	-0.16	-1.685	-0.7274	-0.9051	-1.2758	-0.8365	-0.8186	-0.5208	-0.5543	-0.5146	-1.699	-1.3808	-1.1016	-1.0801	-0.8573	-0.7834	-0.776	-0.9187	-1.3959	-1.4941	-2.1203	-1.1266	-1.7274	-1.4305	-1.1078
HSBP1	-1.0029	0.7545	-0.1746	0.148	1.2606	-1.1297	-0.2345	-0.5606	0.0314	0.4782	-0.1125	-0.5585	-0.4739	-0.7637	-0.6712	-1.2413	0.6826	-0.1861	-0.6148	0.0072	-0.1187	-0.6943	-1.2481	-0.1219	0.2833	-0.6171	-0.7322	0.6434	-1.0233	-0.1376	-0.9799	1.0236	0.516	-0.4189	-0.0101	0.0718	-0.6016	-0.3474	0.281	0.0854	0.1674	0.6211	0.3741	-0.567	0.8552	-0.5692	-0.9379	-0.2898	0.1177
RBM35B	0.3606	2.1345	1.8734	2.0437	2.692	0.3796	3.2523	1.9546	1.3109	1.7364	1.6257	0.5646	1.291	1.8496	1.1097	1.7949	0.6041	1.6055	2.5654	1.7303	2.3782	0.4957	2.3414	2.6149	2.2717	2.3901	1.5854	2.9721	1.7207	1.4319	1.6365	2.6951	2.6288	2.2327	1.434	2.9493	1.7761	2.4417	1.9661	2.0666	2.6243	1.0236	0.8007	1.125	2.7797	1.7373	1.4163	1.0766	0.9709
CDH16	-3.9434	-3.7427	-3.4868	-3.5821	-0.4941	-4.1976	-1.3959	-1.5864	-1.9214	-2.3884	0.189	-4.4517	-3.8079	-3.1329	-1.7274	1.7536	-2.0469	-4.4081	-4.2849	-2.1976	-3.0116	-3.4852	-0.9856	-3.3219	-1.2447	-3.2793	-2.9885	-3.596	-3.2934	-3.4297	-3.0831	-3.2653	0.473	4.5021	-2.9885	-1.1649	-3.7293	-1.889	-2.1714	-0.5564	-3.3219	-0.8494	1.5801	-0.9856	-1.889	-4.1818	-2.2176	-2.7084	-1.2481
NELL2	-1.9105	-2.816	-2.4739	-2.7859	-2.3437	-2.8365	-1.5735	-2.9105	-2.6529	-1.3585	-2.9214	-3.9908	-2.9546	-0.7809	-2.0954	-3.0116	-2.6082	-0.567	-3.5855	-1.2142	-3.6439	-2.191	1.1622	-2.2311	-1.1746	-1.852	-0.484	-3.9302	-1.3076	-3.071	-2.2447	-4.0637	-2.1844	-2.8468	-0.221	-2.662	-3.335	-1.221	-1.7418	-1.2619	-1.1266	-2.114	-2.5907	-2.4982	-2.0589	-0.4501	-4.7065	-4.4675	-2.2042
CMIP	-0.1488	-0.1031	-0.0454	-0.0755	0.33	0.3173	0.5974	0.6636	-0.6897	-0.5973	0.0759	0.315	0.2821	0.3161	0.4297	0.7966	-0.5973	-1.0559	0.099	0.5548	0.4906	0.1137	0.3994	-0.1649	-1.3846	0.1648	-1.5479	0.0745	-0.2793	-0.417	-0.1877	-0.2176	-0.3346	0.1164	0.2029	-0.4422	0.251	0.2951	-0.2226	0.1953	-0.0514	-0.0233	0.0607	0.2461	-0.041	0.0566	-0.9885	0.7058	-0.3076
GRIN2A	0.4521	1.5854	-2.4112	-1.4659	NA	1.3768	NA	-0.2498	0.7155	NA	NA	NA	-0.8836	NA	-0.8783	-0.3865	-4.0661	NA	-0.5756	NA	0.1609	NA	-0.5146	NA	0.2253	NA	NA	0.6425	NA	0.0101	-0.2775	3.9561	-0.0072	NA	NA	NA	0.6636	-0.3022	NA	0.144	1.6346	0.33	NA	NA	2.4576	NA	0.5301	NA	NA
ZNF598	-1.527	-1.3004	-1.3884	-0.6193	-1.1488	-0.7418	-0.9214	-1.4035	-1.4189	-1.1016	-1.6038	-0.5995	-0.8997	-1.0145	-1.5146	-0.8059	-1.6897	-1.1297	-1.2413	-0.606	-0.7131	-0.8573	-0.9296	-1.1779	-1.0923	-1.2653	-1.1976	-1.1424	-0.949	-1.9658	-0.4982	-0.0544	-1.0954	-0.6326	-1.2515	-0.7418	-1.5864	-1.2176	-1.2934	-1.1392	-1.2447	-1.1234	-1.6304	-1.2009	-0.2159	-0.9269	-0.2447	-0.2758	-1.3004
DECR2	-0.1584	0.4319	0.2774	0.9214	0.5231	0.8797	0.7849	0.1776	1.1609	-0.6735	0.111	0.5878	1.1197	0.3138	-0.0893	1.7853	0.8687	1.06	0.7621	0.1763	0.2916	0.3516	0.1738	0.542	0.9635	-0.1763	-1.0923	0.6332	-0.0101	0.779	0.0663	0.4875	0.1296	1.0454	0.1814	0.4362	1.03	1.3651	-0.0087	0.4265	0.1124	0.2179	0.2892	0.0759	1.1763	1.2004	0.7757	0.7155	-0.2828
C16orf35	-2.035	-1.1976	-1.8262	-0.889	-1.662	-1.8783	-0.8704	-1.9379	-2.3292	-1.5864	-1.5228	-0.881	-1.8059	-1.852	-1.5649	-1.4901	-1.7084	-1.4779	-1.2076	-1.0145	-1.3959	-1.458	-1.071	-0.9574	-1.7322	-2.3004	-2.1779	-0.7984	-1.5778	-2.191	-0.889	-0.2176	-1.3364	-1.5228	-1.9434	-1.3622	-1.0862	-1.7959	-1.6259	-1.1424	-1.3622	-1.482	-1.6349	-1.776	-1.2619	-1.5064	-0.662	-1.2447	-1.5395
ORC6L	0.6951	1.3265	0.546	2.2887	0.4936	0.4573	1.2073	1.6452	0.1243	0.5772	0.962	1.1362	1.4271	1.5079	1.0524	2.3147	0.4875	0.7013	1.1257	1.3098	0.9605	0.8488	2.2243	1.4823	0.4005	0.1204	0.4563	0.516	1.1693	0.7066	0.7004	1.2004	0.4147	1.6069	1.6257	0.7527	0.8945	1.8351	0.6654	1.1117	0.4875	0.7562	0.4668	1.0635	1.1985	0.3829	-0.071	0.8472	1.2253
PPP4C	-0.7037	-0.5842	-0.5864	-0.3346	-1.3997	-0.6804	-0.7661	-1.0029	0.2904	-1.1552	-1.1746	0.0566	-0.4286	-0.9885	-1	-0.6126	0.044	-0.7466	-1.3076	-1.2009	-0.6967	-0.8997	-0.9105	-1.1779	0.0072	-1.3622	-1.3292	-1.0559	-1.2828	-0.1861	-1.8468	-0.8314	-0.2447	-0.9351	-1.5951	-0.2619	-0.2653	-1.0923	-1.2042	-0.4208	-1.2793	-0.9602	-1.4659	-0.5458	-0.9602	-0.1062	-0.4035	-1.4739	-1.5479
MGC34647	0.0398	-0.5332	0.2642	-0.1976	-0.8135	-0.7834	-0.3978	-0.1125	0.0229	0.1177	1.0656	-1.3004	0.1635	-0.255	-0.5002	-0.9351	0.7347	0.1043	-0.304	-1.2243	-1.4941	0.0342	-0.7909	1.8568	0.3196	0.3045	-0.1187	0.622	0.1941	0.2951	-0.8599	-0.6897	1.3868	0.8024	-0.1504	1.4746	-0.3456	-0.5907	0.9964	0.1043	1.7102	-0.3183	0.4552	-0.2311	-0.2464	-0.7834	-2.0954	-1.1016	0.6915
TCEB2	-1.0058	0.5008	-0.7274	-0.5084	0.3663	-1.0262	0.3807	-0.1345	-0.152	0.1003	0.4761	-0.2328	-0.041	-1.0116	-0.7346	1.0447	0.3929	-0.5864	0.1557	0.0621	-0.4901	-1.1361	0.7128	-0.1894	-0.1877	-0.1993	-1.2042	0.2881	-0.9406	-0.4055	-0.486	-0.46	0.2881	-1.0145	-0.3383	-0.0029	0.0426	-0.6304	-0.3328	-0.6126	-0.3511	-0.5353	-0.4699	0.515	-0.1536	-0.6781	-1.3696	0.4049	-1.1172
NTN2L	-0.0939	0.0566	-0.4481	-0.0923	-0.1763	0.3651	-0.1552	0.0454	-0.8625	-0.4422	0.0594	-0.0072	0.0718	0.1243	0.1519	0.9598	-0.6349	-0.8211	-0.0291	0.0468	0.6323	-0.2515	0.6452	-0.3959	-0.8573	0.903	-0.662	0.3173	-1.0203	-0.4112	-0.5756	-0.0233	-0.5692	0.2702	-0.4131	-0.077	0.0827	0.1545	-0.3846	-0.0801	-0.1568	-0.0087	-0.097	-0.3292	0.2485	0.1635	-0.0291	0.175	-0.2934
EXOSC6	-0.1861	0.519	0.0186	0.1124	0.5926	0.2376	0.4605	0.4027	0.8734	-0.6038	-0.1345	-0.0862	1.908	0.1789	-0.0189	0.9351	-0.5002	0.2376	0.433	0.5917	0.1519	-0.1617	0.5907	-0.3201	-0.1894	-0.2142	-0.1472	1.6074	-0.2193	0.044	0.1609	0.8568	0.0129	0.1979	-0.0529	-0.3846	0.1991	0.4761	-0.0559	0.5578	0.3045	0.2327	0.3277	-0.3129	-0.0116	0.1003	0.0144	0.0649	0.184
ZCCHC14	0.1648	0.7545	1.175	0.8914	1.0779	0.4615	0.6041	0.3807	0.263	0.9848	0.9613	0.2798	0.6654	0.6182	0.4276	0.4772	0.6462	0.0129	0.8262	1.2467	0.6135	0.1725	0.4875	1.0356	1.2172	1.0847	0.3219	1.5768	0.119	0.6572	0.184	1.5023	1.3863	1.538	0.542	1.4404	1.0969	0.8836	0.6406	0.0314	0.4895	0.6969	1.0942	0.33	0.4521	0.3288	0.7364	0.7916	0.8844
NIP30	-0.7809	-0.1763	-0.8084	-0.191	-0.3437	-1.1649	-0.9828	-0.5522	-1.2969	-0.3165	-0.4344	-1.152	-0.5353	-0.7394	-0.5312	-0.4189	-0.7418	-0.7539	-0.7013	-0.3978	0.0201	-0.9241	-1.3622	-0.4247	-0.606	-0.125	-0.3789	0.03	-0.6282	-0.7131	-0.692	-0.2515	-0.0499	-0.9241	-0.3511	-0.3346	-1.0029	-0.7202	-0.6943	-0.5395	-0.4461	-0.0291	-0.221	-0.6349	-0.3147	-0.4074	-0.852	-0.7155	-0.4659
MTHFSD	-0.4228	0.0412	0.7075	-0.0277	0.1814	-0.8704	-0.8443	-0.6082	-0.6484	-0.7155	-0.454	-1.0116	-1.0058	-0.1408	-0.9269	-0.0544	-1.0439	0.2833	0.4362	1.1063	-0.3076	-1.0589	-0.1156	-0.3566	0.0412	-0.0029	-0.5146	0.1801	-0.4344	-0.2951	-0.1219	0.7416	0.8766	0.433	-0.0664	0.0342	-0.5332	-0.4521	0.1789	-0.6304	-0.4501	0.2594	-0.5125	-0.7563	-1.4035	-0.3383	-0.2533	0.0356	-0.3921
TXNL4B	-1.1746	-0.3201	-1.077	-1.3401	-1.5995	-1.7226	-1.5907	-1.8314	-1.6943	-1.6038	-1.114	-1.7131	-1.5951	-1.6574	-1.9269	-3.0954	-1.1203	-1.3474	-1.3004	-1.9771	0.9826	-0.9771	-2.6439	-1.7661	-0.8135	-0.771	-0.6897	-1.0203	-1.6804	-0.6349	0.0566	-0.6371	-0.9771	-1.1488	-1.8783	-1.6082	-2.2243	-2.0589	-1.1976	-0.7226	-0.4344	-0.5002	0.2129	-1.5522	-0.8262	-0.6574	-1.771	-1.3548	-1.0469
MYST1	-0.9714	-0.4286	-0.8262	-1.1016	-0.6897	-0.2688	-0.077	-0.7226	1.0179	-0.8546	-0.488	-0.0514	-0.7442	-0.737	-0.9241	-1.2345	-0.1681	-0.897	-1.2723	-0.881	-0.3094	-0.6574	-1.1877	-0.5353	-0.3548	-1.7131	-2.035	-1.0203	-1.3437	-0.3094	-1.8314	-0.4286	0.2091	-0.1345	-1.0619	-0.0893	-0.4035	-0.963	-1.1047	-0.8863	-1.077	-1.4074	-0.5522	-0.1001	-0.077	-0.5002	-0.484	-1.3401	-1.5146
VKORC1	-0.1488	0.0086	0.1609	0.4792	-0.1109	-0.1568	0.3785	-0.6193	0.6239	-0.3492	-0.0277	0.4823	0.1674	-0.3328	-0.226	-0.9771	0.0058	-0.6259	-0.6304	-0.1047	0.1164	-0.0801	0.037	-0.0559	0.08	-0.1266	-1.2311	0.1164	-0.8365	-0.2464	0.1017	0.3022	0.648	-0.7179	-0.1811	0.3962	-0.1617	-0.5692	-0.4481	-0.5543	-0.6897	-0.1877	-0.1297	0.3311	0.5675	-0.0291	0.6924	0.3685	-0.0029
ROGDI	-1.4344	0.111	-0.3884	-1.077	-0.725	-1.2863	-0.6552	-1.0439	0.1941	-0.3603	-0.4344	0.1283	-0.488	-1.0499	-1.0321	-1.5395	-0.041	-1.1844	-0.6967	-0.9546	0.7216	-0.6371	-0.2379	0.1635	-0.5291	-0.2881	-2.152	-0.2533	-1.4659	-0.144	-1.685	0.6835	1.3791	0	-0.7637	0.1124	-0.5735	-1.2379	-0.7418	-1.4699	-0.7884	-0.7346	-1.3921	0.2302	0.3196	0.1979	-1.7179	-1.0321	-1.4941
HMOX2	-0.1584	0.5361	0.2363	0.4709	0.8867	0.3863	0.4782	-0.0619	0.8375	-0.0985	-0.0072	1.184	0.6462	-0.1746	0.0594	0.069	0.9672	-0.3437	0.0482	0.2726	0.0786	-0.2176	-0.5649	0.1941	0.4372	-0.2723	-0.6873	0.6906	-0.4921	0.1427	1.025	0.2618	0.6229	0.4782	0.0922	0.6781	-0.1392	0.2951	-0.1828	0.2998	0.419	1.1725	0.7424	0.6951	1.2636	0.6544	0.8655	0.1401	0.2845
LOC124491	0.1003	0.2016	0.2963	0.9627	0.1596	0.315	-0.2193	0.3092	-0.55	-0.7108	0.263	-0.0559	-0.0277	0.1375	0.2253	0.0412	-0.811	0.0841	-0.0544	0.3045	-0.331	-0.4266	0.3196	-0.5249	-0.6282	0.0186	0.051	0.763	-0.1109	0.2485	0.5607	0.6889	0.2714	0.2004	0.2582	-0.4383	-0.0574	0.2726	0.24	0.03	0.1953	0.542	0.0813	-0.897	1.2992	0.3818	-0.8059	0.1776	0.1243
EXOC7	-0.2567	-0.1125	0.584	-0.3959	-1.0619	0.7102	-0.4659	-0.274	0.2179	-0.1649	-0.1714	-0.6484	0.373	-0.415	-0.4739	-0.16	0.4792	-0.1504	-0.4403	-0.2793	0.1164	-0.1665	-0.0877	-0.2619	-0.074	-0.1993	-0.5208	-0.6666	-0.2688	0.224	-0.6484	-0.274	0.7146	-0.0862	-0.0203	-0.454	0.4916	-0.3165	-0.4093	-0.4247	-0.5606	-0.486	-0.5458	-0.0725	-0.5778	-0.0831	-0.3129	-0.4035	-0.5395
PSMB3	-0.2076	-0.6827	0.2845	-0.4521	-0.9574	-0.7013	-1.0893	-0.9714	-0.2026	-0.7179	-0.4501	-0.2951	-0.1568	-0.9546	-0.8443	0.1953	0.1003	0.2881	-1.3364	-1.6304	-0.7274	-1.0145	-1.0058	-0.9942	0.4276	-0.5105	-0.152	-0.7909	-0.8417	-0.5166	1.0093	-1.3548	-0.949	-0.5929	-1.1746	-0.5187	0.2558	-0.4286	-0.737	-0.2042	-0.3808	-0.2447	-0.5907	-0.0908	-0.6394	0.4916	-0.5437	-0.8339	-0.6237
LPO	0.4803	NA	0.0412	0.148	-0.3603	0.5321	NA	-1.3219	NA	NA	-0.816	0.0412	0.7519	NA	0.7049	0.4287	1.4163	-0.9518	-0.2362	NA	NA	0.9268	0.7102	NA	0.3057	1.1884	-1.1714	NA	NA	NA	NA	-1.2828	-0.4982	1.0342	-0.6282	NA	NA	-0.3603	0.0663	-1.6349	-1.3183	NA	-0.0101	-0.4383	NA	NA	NA	-0.8625	-0.4325
MGC13008	0.2666	NA	NA	NA	NA	NA	0.7128	0.8375	NA	NA	-0.4521	NA	NA	-2.3147	NA	NA	NA	-2.2176	1.0158	-0.0725	NA	NA	NA	NA	0.3918	NA	NA	NA	NA	-0.4422	NA	NA	-0.0014	0.5597	0.774	0.433	NA	NA	NA	NA	0.1966	NA	NA	NA	-0.4035	0.4071	0.4688	NA	0.1941
TBCD	-0.3328	-0.16	-0.3715	-0.2042	-0.7466	-1.1976	-0.5735	-0.7394	-0.5437	-0.3004	1.3606	-0.4779	-0.5416	-0.48	-0.7686	-0.5564	-0.3827	-0.1714	-0.3364	-0.6259	-0.4112	-0.3383	-0.5291	-0.4759	-0.1649	-1.3004	-1.482	-0.191	-0.6126	-0.5105	-1.2619	-0.3808	-0.0247	0.84	-0.7809	0.1427	0.1388	-0.4941	-0.6104	-0.7155	-0.7637	-0.9743	-0.8678	0.2339	0.0868	-0.7274	-1.1488	-1.1297	-1.4112
MGAT4C	-3.7179	-3.6224	-3.3703	-3.1584	-3.9083	-3.5838	-3.8324	-4.1456	-3.6785	-4.1304	-3.4755	-3.8406	-4.4051	-4.1662	-4.1278	-3.2109	-2.776	-1.1779	-3.9635	-3.814	-2.7274	-1.3147	-2.5228	-3.0233	-4.1329	-0.9686	-0.0923	-3.0589	-1.221	-3.5683	-2.9214	-3.1203	-1.5312	-2.7084	-2.3219	-4.5328	-3.3823	-4.0734	-2.2934	-3.7999	-4.3335	-3.1844	-3.2653	-3.4485	-3.7779	-3.8079	-2.6804	-2.2863	-2.4112
HN1	-1.5995	-2.737	-1.2515	-1.5437	-2.2723	0.0976	-2.9546	-1.7179	-2.1976	-1.7859	-2.8468	-2.0649	-1.3292	-1.9828	-2.4035	-0.7661	-1.0203	-1.4739	-2.1584	-2.0893	-2.7959	-1.852	-0.8262	-1.7226	-0.6689	-0.4305	-1.5692	-2.4189	-1.5649	-1.2653	-1.7274	-1.8059	-2.5479	-2.2584	-3.0589	-2.1844	-1.6259	-2.3808	-2.8059	-0.456	-2.6171	-1.4035	-2.5395	-1.8059	-2.2109	-1.5692	-0.2142	-1.7612	-2
PNMT	2.2621	-0.3492	1.2928	-0.7784	-1.077	-3.071	-0.4403	0.7442	0.5568	-0.3865	-1.3846	2.2324	-1.1456	-1.0649	-0.0321	2.7784	0.1545	0.4005	1.3623	-0.0831	-2.2176	-2.077	2.3153	-0.5437	-0.6689	-0.2294	2.6388	-0.9771	-0.1763	0.3242	-2.6897	-0.2758	-0.7515	0.5479	0.7949	0.7294	3.717	0.8984	2.3283	-4.0069	-2.5907	-0.6574	-1.4112	-1.0649	-0.5023	-0.3696	2.7757	-2.2515	-1.7179
ZBTB4	1.4457	1.9605	1.4563	1.3022	1.4714	-0.0604	1.742	1.7744	1.099	2.1693	1.6911	0.774	0.8836	1.8355	1.513	0.1852	2.1003	1.0286	2.2228	1.5069	1.2455	2.5008	0.5301	2.1982	1.5361	0.7748	1.2048	1.6406	1.7519	2.1345	1.0875	1.6309	2.0738	1.669	1.8984	2.1583	1.1712	1.0942	1.545	0.546	1.4463	0.2473	0.8098	1.3567	1.8392	1.2998	2.3931	1.0718	1.6229
SERPINF1	1.5583	0.1622	1.8078	1.606	-0.2413	0.103	1.1674	0.0215	1.3528	1.103	0.8115	0.9516	1.3397	2.0303	1.5607	1.189	1.7247	1.1017	1.4265	1.6355	-0.3219	2.125	0.6041	0.6772	1.3329	2.3228	0.726	-0.1861	1.3724	1.1137	1.4201	0.9007	0.3629	-2.0649	1.3357	0.751	1.7035	-0.152	0.3929	1.0405	1.1144	0.7553	1.8536	1.1763	0.7075	-0.1633	0.5008	1.0983	1.6229
SMG6	-0.1047	-0.0649	-0.3921	-0.462	-0.4403	-0.8943	-0.3383	0.0868	-0.7959	-0.0469	-0.4344	0.0072	-0.2126	0.1763	-0.16	-0.1926	0.0718	-0.5543	-0.1361	-0.3292	-0.4016	0.175	-0.6282	0.0243	-0.2758	-0.6666	-1.4659	-0.7013	-0.3022	0.3696	-1.0174	-0.071	0.2054	-0.852	-0.1424	0.229	-0.0218	-0.9406	-0.771	0.1057	-0.7515	-0.4228	-0.7346	-0.2758	0.0881	0.2762	-0.8339	-0.9434	-0.5564
HELZ	1.2552	1.0208	1.3219	2.3556	1.294	3.2132	1.6131	1.1922	0.1966	0.9583	1.9195	0.9811	1.1137	1.5821	1.2296	1.6554	1.3556	1.4657	1.5734	1.4206	1.1814	1.103	1.4967	1.082	0.8592	1.9884	1.9516	1.7433	1.3196	0.7242	1.4662	1.1164	1.4457	1.5893	1.91	1.5806	1.3774	1.5266	1.7066	1.3857	1.3098	1.196	1.5064	1.3121	1.1184	0.9877	2.1157	1.7373	1.5543
MAPK7	-0.7442	-0.3902	-0.0664	-0.2828	-1.1976	-0.4521	-0.3921	-0.4383	-0.7539	-0.6326	-1.0499	0.3994	-0.4719	-0.1568	-0.2951	-0.3715	-0.1617	-0.7274	-0.737	-0.567	-0.7131	-0.4679	-0.9406	-0.7322	-0.7661	-0.9379	-1.1746	-0.8916	-0.771	-0.4901	-1.0985	-0.8186	-0.9132	-0.6104	-0.8314	-0.4286	0.4678	-0.8391	-0.897	-0.2969	-0.749	-0.0087	-0.8009	0.1852	0.2904	-0.1392	-0.5606	-0.2916	-0.3808
PMP22	1.451	0.7672	1.2546	0.9084	-0.1266	-0.5064	1.2116	0.8616	0.9613	1.9579	1.2998	0.7066	1.037	1.0552	2.0524	1.0834	1.5743	0.0663	1.0412	1.6897	-0.4921	1.1467	-1.5821	1.0881	0.9389	1.3265	0.0229	0.779	1.082	1.1263	1.0813	-0.5187	0.8335	-1.2042	1.6512	1.1263	1.7677	0.8189	0.3929	1.5291	0.6145	0.4158	1.4168	1.2041	1.0628	-0.2226	0.433	1.4942	2.1722
SCAP1	1.4378	0.7233	-2.0174	0.0286	0.9449	-1.0087	1.0179	0.4179	-0.5437	0.8246	0.5049	-1.3548	2.34	1.0642	1.0656	2.3513	-0.5228	2.2504	-0.3456	0.0086	-0.6461	1.3098	-1.8573	0.4531	0.6285	-0.2969	1.648	-1.3004	1.2702	-0.0634	0.044	0.9848	-0.2362	0.1322	2.1638	0.893	-0.606	0.2116	0.6164	1.0377	1.0257	1.0007	0.2714	0.7102	0.058	1.2271	1.5361	-1.2379	1.4378
SMURF2	-0.816	-1.3808	-0.1926	-1.0954	-0.3474	1.542	-1.2009	-3.0954	-0.2969	-1.6349	-1.5187	-1.6712	-1.0321	-2.2176	-2.0116	-2.9658	-0.0425	-2.1976	-1.6574	-1.2076	-1.071	-1.9771	-1.2584	-1.2345	-0.2863	1.0642	-0.9658	-0.5479	-2.1844	-1.8262	-0.6038	-0.9743	-0.2845	-1.4901	-1.5479	-0.5479	-1.4659	-1.3183	-0.9546	-1.7131	-0.3201	-1.9658	-0.5951	-0.5713	-1.3548	-0.2464	-1.3808	-0.48	-0.7226
CGI-69	-0.6126	-0.7909	-0.8391	-0.4055	-1.3328	-0.6349	-0.749	-0.811	-0.8443	-1.3328	-0.6193	-0.3771	-0.2277	-0.6827	-0.7155	-0.0985	-1.0529	-0.7202	-0.4659	-0.6897	-0.9159	-0.6038	-0.097	-1.1811	-1.1877	-1.221	-1.527	-0.8863	-0.7959	-0.9714	-1.152	-1.1392	-0.9714	-0.1976	-0.8288	-0.963	-0.0291	-0.364	-0.852	-0.9351	-1.0985	-0.9296	-1.3364	-0.6552	-0.749	-0.1424	-1.035	-1.0529	-1.2758
PNPLA2	-0.3622	0.3254	-0.4208	-0.1282	-0.3865	-0.9434	-0.417	1.058	0.0384	-0.4422	0.0229	-0.3255	-0.243	0.1043	-0.2328	-0.0634	0.0895	0.0621	-0.173	-0.3696	0.0426	-0.364	-0.255	-0.16	-0.8211	-1.3474	-0.8494	-0.2898	-0.7108	0.6267	-1.0985	-0.5249	-0.0087	0.3852	-0.5756	0.2702	-0.2934	-0.2934	0.2253	0.1648	-0.2723	-1.0589	-0.6781	0.2216	0.148	-0.4739	-0.4325	-0.4941	-1.3437
UBTF	-0.6529	-0.4901	-0.6016	-0.6394	-1.0262	-0.2498	-0.692	-0.6259	-0.4074	-1.077	-0.2226	-0.706	-0.7202	-0.4699	-1.1172	-1.1266	-0.889	-0.8314	-0.4403	-0.6967	-0.4247	-0.4901	-0.6416	-0.749	-0.8704	-1.1976	-0.9269	-0.6781	-0.6237	-0.4941	-0.9214	-0.9856	-0.2413	-0.7466	-1	-0.9856	-0.0189	-0.4941	-0.6461	-0.9942	-0.4422	-0.8625	-0.8704	-0.46	-0.7466	-0.1649	-1.0801	-1.6082	-1.0649
STAT5B	-0.9296	-1.3659	-1.2969	-1.8417	-2.3511	-2.482	-2.0529	-1.6484	-1.7322	-1.9714	-1.5951	-0.6712	-1.662	-1.5649	-1.4779	-1.1617	-1.7515	-1.4112	-2.1329	-2.1392	-2.3959	-1.4112	-1.3959	-1.5228	-2.1078	-2.3364	-1.3997	-2.191	-1.949	-1.3255	-2.2243	-2.3585	-1.8625	-1.2379	-1.5146	-1.8417	-0.9602	-1.8468	-2.0291	-2.0589	-1.7322	-1.9714	-1.7131	-1.3474	-1.6082	-1.0439	-2.3884	-2.4422	-2.3659
STAT3	0.5028	0.8695	1.1654	0.5069	0.4404	0.3357	0.6817	0.4657	1.0165	0.9723	1.0108	0.6285	0.8938	0.3288	0.3092	0.3323	1.2756	0.5281	0.0745	-0.4739	1.0875	0.4308	-0.1424	1.0841	0.6069	-0.1424	0.0243	1.0607	0.0881	1.2302	-0.5973	0.2678	0.8663	0.6736	-0.3383	1.3885	0.9313	0.5888	0.6267	0.8496	0.4792	0.1532	1.1545	0.8766	0.3254	1.0676	0.355	-0.2934	0.3448
CCDC56	-0.0877	-0.2396	0.9245	0.514	0.5568	-0.2142	0.1661	0.0772	0.6041	0.2327	0.704	0.406	0.1903	-0.3696	-0.2277	0.1712	-0.0695	0.257	0.5607	-0.2688	-0.3437	0.2606	-0.4461	0.5018	0.4297	-0.1976	0.0813	0.5724	-0.1844	-0.1094	-0.077	0.6835	0.4168	0.9493	0.1903	0.517	0.1388	0.4351	0.4531	0.2203	-0.0634	0.3741	0.7075	0.6098	0.7807	0.3022	1.4766	0.1953	0.1991
ARL13B	-0.9856	-0.8783	-0.1959	-0.852	-0.3183	-0.9658	-0.4305	-0.8625	0.1204	0.739	0.0243	-0.8084	-0.6897	-1.3585	-0.4189	-0.8262	0.451	-0.897	-0.364	-0.6689	-1.1746	-0.4719	-0.8211	0.0963	-0.3255	0.4071	0.6079	0.4782	-0.6967	-0.4074	-0.0174	-0.2396	0.6248	-0.255	-0.3603	0.0813	-0.6712	-0.3659	-0.0499	-1.2828	0.2987	-0.8997	0.1648	-0.4481	-0.0664	-0.5146	0.2116	-0.394	0.5039
MYOHD1	-1.7612	-2.5649	-1.6712	-1.5692	-2.2311	-1.4739	-2.2447	-2.458	-1.7612	-2.071	-2	-0.6873	-1.6943	-1.4659	-2.2653	-0.5886	-2.4659	-1.6897	-2.0174	-1.8836	-1.8365	-2.2447	-0.8916	-2.0058	-1.852	-2.3733	-1.3401	-2	-2.1456	-2.7179	-0.3004	-2.9885	-2.2447	-2.4901	-2.152	-1.2413	-0.9518	-2.2723	-2.3076	-1.8314	-2.5564	-1.1649	-2.8573	-1.5146	-1.6171	-1.9602	-1.3659	-1.8997	-1.6215
HOXB3	-0.1234	0.1362	-0.606	0.2678	1.1763	-0.0174	-0.4961	-0.364	-1.3437	-0.4131	-0.1392	0.419	-0.0574	0.545	0.1609	0.9546	-0.6282	0.4626	-0.3292	1.3488	0.3984	-0.3865	-0.5249	0.3674	-1.2109	-0.6371	-0.4112	-0.5564	-0.125	0.7545	-0.4461	0.355	-0.6712	-0.0664	-0.1584	-0.417	0.0014	0.5069	-0.5312	-0.0145	-0.5228	0.3092	-0.2881	0.1557	-0.0321	0.0272	-0.5023	-0.8391	-0.1313
SUZ12	-0.3659	-1.1714	0.0412	-0.488	-0.4921	-0.0923	-0.4055	-1.0233	-0.7784	-0.2379	0	-0.2396	-0.4659	-0.3437	-0.3733	0.1097	-1.3884	0.5675	0	-0.4035	-1.2584	-0.9105	-0.0939	-0.5995	-0.816	-0.243	0.4521	-0.0664	-0.0985	-1.2688	-0.4131	-0.7466	-0.6461	-0.4247	0.0072	-0.3752	-0.7084	-0.1078	-0.6873	-0.3511	-0.1763	-0.0218	0.0635	-0.077	-0.771	-0.4403	-0.1681	-0.3659	-0.173
GIT1	-1.3364	-1.6943	-0.9159	-1.5821	-2.3004	-1.1681	-1.9714	-1.7084	-1.6574	-1.737	-1.2515	-1.1617	-1.5735	-1.811	-1.852	-0.2863	-1.5228	-1.7563	-1.9771	-2.4035	-1.3959	-1.8783	-0.8314	-1.6712	-1.5735	-1.6758	-2.3437	-1.4901	-2.458	-1.6304	-2.071	-1.8625	-1.5064	-0.9351	-2.3364	-1.5353	-1.2042	-1.5564	-1.949	-1.5395	-2.4659	-2.0529	-1.6574	-1.2481	-1.3959	-0.9187	-2.0589	-1.771	-2.3292
AIPL1	-4.5262	-4.4297	-4.1844	-2.2793	-5.0541	-4.8283	-5.1178	-2.2515	-5.357	-5.2216	-4.8868	-4.8656	-5.0541	-5.2216	-5.0116	-4.2709	-3.1329	-5.0116	-4.9794	-4.6693	-3.8975	-4.0116	-4.5295	-4.3335	-5.0979	-4.0069	-4.1103	-4.3335	-4.4739	-4.7408	-1.6259	-3.9456	-3.2243	-4.257	-3.7009	-5.5129	-4.816	-5.1636	-3.7198	-3.6153	-5.088	-4.8699	-3.9105	-3.7427	-4.2082	-4.4901	-3.7505	-2.9214	-4.6584
ZFP3	-0.1047	0.2054	1.3004	0.4647	1.1661	0.8592	0.3391	-0.1345	0.8655	0.7312	NA	0.1164	-0.415	0.2582	-0.4131	-0.5084	1.2382	-0.041	-0.6689	0.7849	-0.2723	0.9664	NA	0.0718	0.4468	0.1177	-0.5522	0.4027	-0.46	0.4813	-0.5842	0.6406	NA	0.3403	0.1388	0.6201	-0.0923	-0.0395	NA	-0.4344	1.3231	NA	0.2916	0.451	0.8544	-0.5002	0.1789	NA	0.4383
MGC29671	0.8041	0.281	0.4875	0.8189	1.2234	0.3494	1.0158	1.1043	0.2951	0.9007	1.1467	0.3785	0.0731	1.0186	0.852	1.2247	0.5028	1.2987	0.3033	0.5539	1.0086	0.2963	0.5018	1.0861	0.8189	0.2798	0.9161	0.6708	0.6154	0.7706	0.4895	-0.4208	0.5281	1.6017	1.6489	1.596	0.1852	1.2066	0.7807	1.26	1.6304	0.7172	0.8082	0.584	0.9553	0.809	0.2998	0.8891	0.518
KRT38	1.0314	0.0524	1.3127	0.4936	0.224	1.1564	1.1512	0.6295	-0.4189	0.1349	0.3994	1.1434	0.2179	0.3482	-0.1456	0.6672	-0.4016	0.4287	0.1991	1.6902	0.0909	0.8229	1.0752	1.1648	-0.776	0.9298	0.5801	0.5281	0.7807	0.3561	-0.1681	-0.0233	0.0172	1.2327	0.4988	0.0286	0.9583	0.119	1.5205	1.0847	0.2203	0.2618	1.105	0.058	-0.0174	0.5341	-0.567	-0.3111	0.1375
NOTUM	-0.5208	-0.5778	-0.8943	-0.4266	-0.0877	-0.2934	-0.4093	-0.2362	-0.8599	-0.6259	-0.3401	-0.0847	-0.3789	-0.0679	-0.1329	-0.0233	-1.2515	-0.776	-0.1456	-0.6804	-1.0116	-0.4699	0.8875	-0.7834	-1.1617	-0.2584	-0.4035	-0.692	-0.7466	-0.4719	-0.7784	-0.2176	-0.6506	-0.0877	-0.6873	1.3629	-0.4093	-0.1877	0.0454	0.2892	-0.3328	-0.6282	-0.5522	-0.6104	-0.1266	-0.6897	-0.4189	-0.2311	-0.5842
TMC6	2.2373	1.4542	1.4772	2.2082	1.0676	2.278	1.7497	1.3718	1.9434	1.7647	1.6938	1.9115	2.083	2.5188	2.0724	1.8311	2.3434	1.6704	1.9734	1.934	2.546	2.1378	2.123	1.84	1.8127	0.7128	0.3741	1.6668	1.6785	1.6253	0.519	1.2357	1.7411	1.6668	1.5028	2.0388	2.4471	1.842	2.0844	2.1027	1.0929	0.9745	1.1635	2.2265	1.6173	2.251	1.1473	0.8115	0.9275
LOC654346	2.6893	2.5979	2.4225	3.1755	2.2113	2.5712	2.3022	3.1457	2.1846	2.0129	2.1699	2.7007	3.0841	1.7862	2.8779	3.6882	2.1935	2.5231	1.9324	2.3601	1.9176	2.0503	0.7424	1.8282	2.4193	1.0496	1.8887	1.8061	2.1906	2.7455	0.9775	2.019	1.9598	2.8412	1.9627	2.281	2.5811	2.1127	2.0707	2.3036	1.962	2.2519	2.8148	3.0533	2.7549	2.3334	2.5751	2.5678	2.2636
KRTAP9-3	NA	NA	NA	NA	NA	NA	NA	NA	NA	NA	NA	NA	NA	NA	NA	NA	NA	NA	NA	NA	NA	NA	NA	NA	NA	NA	NA	NA	NA	NA	NA	NA	0.0172	-0.2059	NA	NA	NA	NA	-0.0291	NA	NA	NA	-0.114	NA	-1.0029	NA	NA	NA	NA
KRTAP3-2	NA	NA	NA	NA	NA	NA	NA	NA	NA	NA	NA	NA	NA	NA	NA	0.2449	NA	1.1941	NA	NA	NA	NA	NA	-1.071	NA	NA	0.9161	NA	NA	NA	NA	NA	0.0014	0.3796	NA	NA	NA	0.0342	-0.0664	NA	NA	NA	-0.1504	NA	NA	NA	NA	NA	NA
KRT34	-4.2029	-4.9523	-5.3162	-3.9794	-5.9127	-4.1456	-4.3277	-6.2324	-5.5262	-5.5666	-5.5598	-4.0069	-4.8079	-5.1329	-5.2109	-5.0069	-2.6897	-5.7486	-3.816	-5.2002	-3.1203	-5.4112	-3.4643	-5.6295	-6.6439	-4.088	-3.5718	-5.6657	-5.8614	-5.0637	-4.3511	-3.8201	-4.4933	-5.3219	-4.9523	-6.2653	-4.7408	-5.1078	-4.8783	-4.3047	-6.1792	-4.4739	-4.5031	-5.5195	-5.6804	-5.4612	-5.0637	-4.699	-0.706
OR1E1	2.5168	4.1235	1.2708	2.6567	0.52	0.517	2.6313	2.0718	2.4885	1.6677	3.1362	3.0206	1.3369	3.4983	3.1702	2.4691	1.7294	3.0502	1.105	1.7816	3.0014	2.1616	1.6374	2.5054	1.9939	1.2738	1.9978	3.6346	-0.071	2.7738	1.5811	1.7022	0.3242	2.6112	1.0902	3.5607	2.0147	1.745	1.6211	2.5472	3.4542	1.3907	3.541	2.6767	2.8516	2.6862	-0.0664	1.3802	2.2461
SPATA22	-1.9771	-1.3111	-1.5564	-0.7809	-1.1016	-2.5821	-0.255	NA	-2.1266	-2.4901	NA	-1.811	-1.2515	-1.8783	-0.8034	-0.8494	NA	NA	-0.1894	-2	-0.9462	0.6041	-1.077	-0.6781	-2.5146	-0.8916	-0.6259	-1.4941	-1.4305	-0.4719	-1.3997	NA	-0.013	NA	-0.1811	-2.1844	-0.488	-2.0291	-0.4112	-0.8288	-1.8997	NA	NA	NA	-1.7612	-1.2413	-0.7834	NA	-1.0679
COPZ2	1.4093	1.1104	1.4636	1.0243	-0.46	-0.3659	-0.2934	-0.4325	0.4489	0.7268	-0.2758	0.3138	1.5588	0.4468	0.992	1.1661	0.7782	-0.3511	0.84	1.0711	0.1878	1.8444	-0.2126	-0.0425	0.1336	1.4098	-0.8916	-0.114	0.1966	0.2302	0.4834	0.9913	0.5743	-1.1361	0.8262	0.4834	1.642	-1.0321	-0.1568	0.91	-0.737	0.6452	0.6862	0.474	1.0745	-0.7013	-0.2533	-0.041	1.0468
CTDP1	0.5039	-0.3004	-0.0058	-0.038	-0.4501	-0.4208	0.0043	0.2041	0.2302	0.0621	-0.0145	-0.0058	0.0129	0.4563	0.3265	-0.274	0.4027	-0.3058	0.0552	-0.3419	-0.2584	0.0718	0.1903	-0.013	-0.3147	-0.4442	-0.3789	-0.2294	0.0841	0.5271	-1.0087	-0.191	0.1953	0.0827	-0.6126	0.4563	0.3663	-0.364	-0.3292	0.3505	-0.7013	-0.1697	-0.4112	0.0621	-0.3219	0.2558	-0.1844	-0.3677	-0.2898
GRP	-4.8242	-3.6349	0.6003	-4.0093	-3.4454	-5.8783	-4.3899	-3.1078	-3.1844	-1.4266	-3.8079	-4.402	-1.4501	-3.699	-3.1714	-1.699	-2.9324	-5.7027	1.2582	-1.1456	-3.6675	-2.816	-6.1584	-0.9942	-3.6638	-0.8916	-6.5462	-3.6529	-4.4204	-3.4901	-4.3748	-4.4548	-2.9434	-4.8283	-2.8573	-3.7839	-0.454	-3.335	-4.7179	-6.6439	-4.0445	-0.4921	-1.3959	-2.2379	-3.5228	-5.6439	-4.4643	-4.7217	-2.1976
RNF125	1.1947	1.8319	1.8844	2.5719	-2.2447	-2.6712	-2.2863	1.7553	0.0635	-0.8211	-1.3585	0.5597	-1.7809	-0.7131	-1.5692	0.301	-0.4093	-0.737	-2.0291	-1.685	-0.6552	-1.6804	-1.662	-1.4228	-0.0664	-2.8573	0.1557	-2.114	-0.3827	0.3561	-1.5778	0.474	-1.5778	-2.9214	-0.7588	-0.949	-1.6304	-1.5606	-0.5522	-1.5353	-1.462	-2.9658	-1.1552	0.1003	-2.5995	-1.1297	-1.1361	-0.9051	-0.9518
NARS	-0.6529	-0.8625	-0.5084	-0.5864	-0.1552	-1.0262	-0.2567	-0.1568	-0.9971	-0.2828	-0.255	-0.7834	-0.4442	-0.5479	-0.0218	-1.2345	0.2277	-0.2277	0.1827	-0.1828	-0.9434	-0.852	-1.038	-0.456	-0.5291	-0.3566	0.1635	0.1375	-0.0954	-0.3165	0.0029	0.1763	-0.3111	-0.6304	-0.6597	0.107	-0.4422	-0.811	-0.1376	-0.0877	-0.3419	0.3254	0.364	-0.8314	-1.041	-0.0664	0.8758	0.1177	0.224
MYO5B	0.6248	-0.0755	0.7874	0.6107	-0.013	1.7502	0.2302	1.9302	0.3033	0.0841	-0.0189	1.2564	0.9855	-0.16	-0.2584	0.8552	1.9819	0.5361	0.2104	0.5656	-0.6574	-0.458	-0.8009	-0.1234	-0.1345	-0.4659	-0.6506	0.6304	0.257	1.688	0.8049	1.1583	-0.46	-0.1811	-1.2277	-0.4112	0.3752	-0.7661	0.5597	-0.077	-0.074	1.355	0.4436	-0.4921	0.2654	0.7198	1.1635	0.8961	-0.0589
CYB5A	2.8608	3.0108	2.7685	2.0272	3.3291	1.4854	3.5644	2.8209	3.0791	3.5135	4.1309	2.4903	1.6745	2.1283	3.2752	-0.4266	3.0307	2.0618	4.235	2.9477	2.8873	1.7338	2.0419	4.1043	1.9512	3.2304	2.4521	3.6218	2.8022	3.0791	1.3696	4.2972	3.9672	3.843	3.2975	3.6668	2.9793	3.5484	3.6147	1.545	2.9714	2.3406	4.0027	3.0512	1.85	3.6182	3.4529	2.7491	2.6681
SFRP1	-4.2905	-3.8552	-3.5345	-4.2461	-4.7141	-4.4454	-3.1329	-4.5769	-1.2863	-3.9258	-4.227	-1.2277	-2.3585	-2.3004	-1.4344	-3.2934	-2.4982	-4.1228	-2.5479	-4.1559	-4.1329	-3.3629	-4.4739	-4.1584	-3.553	-2.5146	-5.4804	-5.0541	-1.8678	-3.2243	-4.5977	0.0144	-2.9546	-2.4344	-2.458	-3.4659	-4.1304	-3.458	-5.7642	-3.8826	-4.1153	-3.4282	-2.9324	-2.8678	-2.3884	-4.8079	-0.304	-4.9302	-0.7202
C18orf21	-0.016	-0.46	0.2998	-0.4364	0.1674	-0.6371	0.0718	-0.3437	-0.255	0.3242	-0.0145	-0.1031	-0.0365	-0.2142	0.0215	-1.221	0.4049	0.3595	0.269	-0.0499	-0.3364	-0.3111	1.2116	-0.1297	0.2904	0.7093	0.4761	0.0607	0.3516	-0.1714	0.9222	0.3528	0.1217	-0.6552	0.0663	0.0841	-0.0101	0.3196	0.0731	-0.2126	0.1763	0.585	0.2774	-0.2723	-0.9024	0.1043	0.4394	0.3323	0.5519
LOC147645	-1.7809	-2.2863	-1.7084	-1.3183	0.6727	-3.904	-1.6758	-1.7084	-2.9324	-0.852	-1.3147	-2.7661	-1.3364	-1.6758	-0.7013	-2.3808	-1.662	-2.5649	-1.0619	-0.7984	-2.2863	-2.5735	0.7312	-1.8314	-0.0439	-2.2653	-2.7959	-1.9214	-1.8059	-0.7037	-0.6484	-1.8678	-2.1456	-0.8417	-1.415	-2.1016	-1.415	-1.5353	-1.2863	-1.4699	-1.4941	-1.873	-1.4699	-1.1456	-0.889	-2.2653	-2.1329	-1.8573	-1.6038
ZNF614	0.0314	-0.4305	1.9309	0.7579	1.3967	-0.7037	-0.2671	-0.7131	-0.1266	0.0949	0.0356	0.4005	0.4082	0.511	-0.1329	-0.9914	0.0043	0.7841	-0.0029	0.0841	-0.0877	-0.255	-2.1203	0.1336	-0.5842	1.4657	0.7757	-0.2009	0.8945	-0.9828	0.6248	2.0858	0.2558	-0.6104	0.3741	0.2437	0.9351	0.281	-0.0189	-0.255	0.2774	0.3242	-0.3076	-0.3419	-0.3902	-0.0634	1.5777	0.4351	0.6443
ZNF446	-0.2636	-0.1219	-0.6781	-0.0218	-0.3076	-0.7346	0.0881	-0.1376	0.3068	0.0909	-0.2345	0.2845	0.4834	-0.1828	-0.4266	0.2449	-0.3696	-0.1568	0.0482	-0.0499	0.1124	-0.4901	0.4049	0.2522	-0.7612	-0.6394	-0.8468	0.1699	-0.1345	-0.2396	-1.7515	0.044	0.0813	0.4212	0.0538	0.2618	0.0841	0.6135	-0.1078	-0.4501	-0.706	-0.3364	-0.9914	0.1635	0.3929	0.0314	-0.6371	-0.5249	-0.5395
ZNF587	0.584	0.7373	0.2654	1.5627	-0.4131	0.5782	0.6369	1.2975	0.5617	-0.1697	0.4772	0.8375	1.2271	0.9328	0.0881	1.117	0.2327	-0.1424	0.269	0.4436	0.992	0.1916	2.5145	-0.5821	-0.0189	-0.1861	-1.1552	-0.3437	0.4552	0.3208	-0.456	0.8867	0.4351	0.9767	0.263	0.1789	0.2497	0.2363	0.1257	-0.5929	-0.3456	0.0621	0.1878	0.2166	0.7442	0.0704	0.3962	-0.016	-0.2345
EML2	-0.9856	-0.2881	-0.9051	-0.7298	-1.0029	-1.5187	-0.8211	0.1519	-0.3165	-0.7637	-0.2481	-1.1456	-0.0043	-0.1795	-1.1078	0.1336	-0.5842	-2.7661	-0.3273	-1.5437	0.0158	-0.1681	-0.5756	0.4615	-0.4055	-2	-2.3437	-0.4403	-1.0087	0.7093	-2.3511	-0.7612	0.3288	0.9833	-1.0831	0.4049	-0.5929	-1.2076	-0.9518	-0.6038	-1.077	-1.2176	-1.3997	0.0649	-0.3511	0.2786	-1.4461	-1.9885	-1.9051
ZNF285	-1.0233	-1.2934	-0.6439	-0.0072	-1.6897	-3.0469	-2.6439	-1.4112	-2.3292	-0.699	-1.6038	-0.9132	-0.4699	-1.4779	-2.3004	-1.3111	-0.0786	-2.3959	-0.5543	-1.8836	0.7338	0.4626	-4.3423	-0.274	0.2618	1.1434	-0.8916	-1.0559	0.6369	-1.6215	-0.2481	-3.9954	-0.5312	-3.9885	-0.274	0.3505	-1.0529	-1.5995	0.3763	-0.9406	-0.1536	0.4179	-2.7084	-1.3622	-0.9241	0.6397	-0.9462	-0.889	-0.7013
ARHGEF1	-0.2567	-0.1488	-0.9518	-0.3165	-0.2653	0.0384	-0.2277	0.1878	-0.7859	-0.0954	-0.0101	-0.417	0.069	0.7013	-0.2653	0.2473	-0.4422	0.0029	-0.4679	-0.6781	-0.3076	0.1349	-0.4961	0.4415	0.148	-0.5146	0.0786	-0.1926	0.058	0.127	-1.415	-0.816	0.3334	0.2314	0.5241	0.8032	0.3752	0.2558	-0.0786	0.4016	0.0314	-0.1536	-0.9159	0.4957	0.4136	0.4709	-0.6666	-0.5249	-0.5973
FLJ12949	-0.1078	0.0043	-0.1568	-0.0559	-0.4228	-0.1649	0.1467	0.148	-0.097	-0.3997	0.0158	0.3796	0.275	0.1635	-0.077	0.7381	-0.5522	-0.2142	0.3045	0.1362	0.0172	-0.1187	0.4772	-0.4189	0.1789	-0.1746	-0.3255	-0.2345	0.2054	-0.1697	-0.1504	-0.3511	-0.2481	0.2998	0.2079	-0.5395	0.4415	0.4404	-0.038	-0.2362	0.1699	0.1814	-0.074	0.1322	0.1814	0.4351	-0.3808	0.037	-0.3201
ATG4D	-1.6394	-1.5105	-2.0649	-1.7909	-1.8468	-1.6758	-1.527	-1.527	-1.816	-1.527	-1.5522	-1.2042	-1.1811	-1.8678	-1.527	-1.4266	-1.8059	-1.6215	-1.7274	-2.3585	-1.3771	-1.2863	-1.3808	-1.5907	-1.8468	-1.6804	-2.5649	-1.6082	-2.2515	-1.4035	-2.4112	-1.2379	-1.6484	-1.2723	-1.6897	-1.9159	-1.4112	-1.2176	-1.2653	-1.2243	-1.9771	-1.685	-1.7466	-1.5105	-1.4035	-0.685	-2.2379	-2.2379	-2.1203
NKIRAS2	-0.5437	-0.9051	-0.2042	-0.4344	-1.152	-0.5842	-0.8757	-1.0559	-0.6082	-0.9406	-0.7637	-0.5249	-0.2447	-0.9518	-1.1617	-0.7588	-0.8651	-0.7735	-1.2969	-1.2413	-0.7394	-1.0619	-0.6016	-1.2934	-1.5564	-1.3183	-1.5228	-1.0985	-1.4461	-0.6552	-1.7037	-1.2584	-0.8034	-1.0439	-1.4901	-1.1016	-0.255	-1.3004	-1.0559	-1.0116	-1.5228	-0.9714	-1.1016	-0.4035	-0.6461	-0.5842	-1.5821	-1.4035	-1.3111
ZNF426	0.1243	-0.0365	-0.3902	0.0086	-0.2396	-0.8262	-0.4305	-1.482	0.5231	-0.144	-1.5023	0.0158	-0.6967	-0.7037	-1.486	-1.3771	0.6088	0.1388	-0.0695	-0.4383	0.0014	0.4308	-0.6104	-1.3076	1.1322	-0.9971	0.9993	-0.4112	0.4605	0.3033	-0.1536	-0.0939	-0.4112	-0.6193	-0.462	-1.0439	-0.6552	-0.5187	-0.9187	-1.4035	-0.173	-0.3659	-0.8863	-0.7588	-0.8391	-0.3752	0.4647	-1.2969	-0.488
CYP2S1	0.976	-0.4521	-0.5564	-0.0619	0.6397	-0.6666	-0.7809	2.3931	-0.2243	0.24	-0.5437	-0.8836	0.8544	0.2327	0.1814	1.224	0.0229	-0.4961	-0.1779	-0.5907	-0.7809	-1.2688	1.537	0.1776	-0.4055	1.2222	0.636	0.2845	-0.2092	1.8003	-0.2142	-0.2126	0.9313	-1.685	0.3539	0.0314	0.2762	0.1003	0.9605	-0.6193	0.4404	-0.6666	-0.9105	-0.4266	0.2412	0.2461	0.7233	-0.2951	-0.4901
B3GNT8	2.654	3.7782	2.2872	3.5583	3.3757	-0.152	3.8758	3.5957	2.4316	3.6404	4.3681	1.3606	2.168	3.9533	3.8728	3.4957	2.8313	1.2969	4.466	3.5969	3.1876	3.854	3.8629	4.101	3.2155	3.3519	2.9813	4.2638	2.5828	3.0927	0.5509	3.9336	4.0303	4.0764	3.1892	4.3526	2.9996	4.4963	3.9477	2.05	3.796	2.7989	3.6949	4.1985	4.153	2.5874	3.756	3.2945	3.0685
TMEM38A	-0.013	-0.48	-0.2567	-0.5778	-1.1779	0.8663	-0.48	0.7706	-1.2723	-1.1844	-0.7131	-0.2602	-0.5437	-1.2345	-1.6897	-1.5995	-1.4779	-0.8651	-0.0189	-1.2447	-0.7661	-1.2109	0.1699	-1.2758	-1.0559	0.605	-1.5023	-1.1943	-1.1203	0.8359	-0.5023	-0.8034	-0.9546	0.1827	-0.2076	-1.6259	-1.1078	-0.4035	-0.8314	-0.9351	-1.0985	-0.2059	-0.2328	-0.8186	-0.1681	-0.5543	-1.7226	-1.1392	-1.9379
C3	2.2615	3.7698	2.4478	2.9705	0.9023	3.1574	2.851	2.3408	3.384	3.4276	3.4019	4.0764	1.5494	3.3044	3.1649	1.8258	3.0924	2.4502	3.0022	2.1868	3.926	4.144	-2.0529	2.2636	2.7299	1.5835	1.8298	3.8875	3.0204	3.5398	1.5782	0.4082	3.5223	4.2141	3.4489	3.3377	1.9931	2.5722	3.5969	3.2566	4.0747	2.61	3.6334	3.2597	2.3626	1.692	1.3283	2.1447	2.6232
EVI5L	-0.0619	-0.1109	-0.1811	-0.7466	-0.7661	-0.3585	-0.567	-0.3808	-0.1795	-0.662	-0.5187	0.0215	-0.226	-0.3548	-0.5437	0.103	-0.4982	-0.699	-0.6038	-0.8468	-0.4247	-0.456	-0.3978	-0.7108	-1.0439	-0.4739	-1.3771	-0.3255	-1.1877	-0.527	-0.7108	-0.3237	-0.1536	-0.454	-1.2515	-0.7959	-0.1617	-0.5628	-0.9743	-0.6371	-0.5522	-0.4699	-0.8468	-0.4247	-0.2619	-0.2328	-0.9799	-1.2109	-1.1552
NALP12	1.9038	0.5499	1.8762	-1.7515	-1.0203	-2.0233	-2.152	-1.4982	1.8548	-0.226	-1.6394	1.5445	-0.55	-0.2447	0.8711	-3.2934	0.308	-2.0116	0.4027	0.1661	-0.7612	0.6022	-3.776	-1.0087	-0.3273	0.4761	-3.1584	-1.8262	-2.7179	0.5974	-1.2277	1.5435	-0.0514	-0.125	-1.6082	-2.2379	0.4287	-2.7661	-3.3496	-1.4461	-1.9269	-1.3004	-0.7661	-0.7442	-1.9714	-3.1456	2.3975	-1.5353	-0.4208
MGC10471	0.4016	0.4936	-0.0087	0.3994	0.1336	0.2461	1.0014	0.8758	0.3208	0.9061	0.606	0.6554	1.3103	0.7364	0.6443	1.426	0.3231	0.4834	0.6098	0.7891	1.1197	1.0503	0.3863	1.1427	0.9523	0.1349	0.1388	0.281	1.1408	0.8286	-0.2413	0.8774	0.5331	1.2277	1.1821	1.4314	0.8032	0.9664	0.346	0.8899	0.1609	0.3885	0.0663	0.9107	1.3539	0.5039	-0.3659	0.6369	0.6498
ZNF442	0.5281	0.2975	0.6022	0.6154	0.6126	-0.2636	0.3651	0.1454	0.7681	0.704	-0.1488	-0.0218	-0.5437	-0.4901	-0.46	-1.0029	0.648	0.4362	0.0144	-0.0277	0.3242	-0.4247	-0.6781	-0.1976	1.595	0.8992	0.9899	0.3852	0.688	0.9709	1.5221	0.9598	1.0215	0.0115	0.1903	0.8488	-0.226	0.08	0.7732	0.0552	0.6717	0.5361	0.7407	0.2228	0.0881	0.4005	1.3346	-0.2092	-0.5291
MAST1	-1.2447	-1.035	-1.1714	-0.9885	-1.1746	-0.9518	-0.462	-0.5543	-1.5395	-1.9379	-1.0029	-1.3437	-1.1297	-0.2176	-0.1219	0.3763	-2.2109	-2.2109	-0.1094	-0.462	-0.8288	-1.1681	-0.1828	-1.3401	-2.0893	-1.1488	-2.1392	-1.1297	-1.6304	-1.9105	-0.9269	-1.5228	-2.1078	-1.7084	-0.6304	-1.5064	-1.1266	-1.1109	-1.2723	-0.949	-0.7588	-0.8237	-1.1109	-0.4344	-1.2176	-0.5929	-1.0831	-0.5649	-1.2863
KLK11	-0.7909	3.645	4.4323	2.0293	3.7398	-4.0069	2.5013	5.5423	4.4874	3.9928	-1.3328	2.7111	-1.0029	3.7038	2.189	5.9846	3.9598	1.7009	0.8392	4.2234	-1.415	5.5804	-2.2653	2.801	4.1309	-0.963	1.211	0.8197	2.9465	4.6798	0.7075	4.5564	1.6318	5.6999	3.3377	4.1546	4.4216	3.2353	-0.6529	-4.3599	-1.9324	3.8237	4.1497	3.6904	3.1349	-2.114	5.2924	0.3929	2.9121
KCNC3	-1.3004	-1.3076	-1.3511	-0.5864	-0.8863	-1.2413	-0.7013	-0.771	-1.3696	-1.5522	-1.1329	-1.2793	-1.1617	-0.7984	-0.5353	-0.226	-1.1361	-0.9546	-0.0679	-0.7037	-0.6461	-1.077	-0.1811	-0.9296	-1.8365	-1.2934	-0.6461	-0.0529	-1.6082	-1.221	-0.8365	-1.2311	-1.2345	-0.5606	-0.771	-1.6349	-1.0058	0.5291	-0.2688	-0.8704	-0.3921	-1.3004	-0.7155	-1.0029	-0.1187	-1.2584	-0.9856	-1.0439	-0.6215
C19orf41	-0.3255	4.942	0.4244	0.1852	NA	NA	0.115	1.8303	0.3584	2.6318	4.3356	NA	0.4947	0.5926	1.6645	1.7753	0.8774	0.9701	-1.2758	4.3125	NA	NA	NA	NA	0.9957	NA	NA	NA	0.0895	0.4751	2.2821	3.7366	-0.0101	NA	-0.0189	4.2578	NA	0.696	NA	1.3907	2.5415	3.225	NA	0.1003	5.7156	0.3907	NA	NA	NA
RPS11	0.7329	0.3115	0.3196	0.0172	-0.2515	0.5917	0.5675	0.0552	1.0193	1.0922	0.8335	0.3852	0.384	0.3494	0.1506	-0.4679	1.0566	0.6471	0.6173	-0.1266	0.4016	0.0676	0.5753	0.543	0.9635	0.9848	1.1725	0.5636	0.2594	0.9153	0.1699	-0.699	0.7553	0.8123	0.6267	0.7519	0.6323	0.1953	1.0635	0.0963	0.8335	0.2881	0.539	0.451	0.7991	0.8172	0.9373	-0.3419	0.636
BCAT2	-0.8135	-0.3548	-0.55	-0.6781	-0.304	-0.6506	0.0854	-0.8314	-0.5064	-0.2515	0.03	-0.5649	-0.1297	-0.2793	-0.3383	-0.415	-0.0499	-0.1844	0.538	-0.8211	-0.7394	-1.0862	0.1322	-0.3346	-0.1234	-0.7274	-0.1125	-0.0101	-0.606	-0.4982	-0.9187	-0.5628	-0.0831	0.2845	-0.6666	0.1966	-0.0043	0.1414	-0.0877	-0.4521	0.2041	-0.889	-0.9078	0.0215	0.0043	0.3962	-0.4901	-0.7859	-0.9159
CHMP6	-0.0233	-0.0454	0.3528	-0.1376	-0.2176	0.0745	0.0482	0.0718	-0.1504	0.0172	0.5695	-0.035	0.0718	-0.0649	0.2774	0.6397	0.1928	0.1057	0.1388	0.3219	0.3022	0.0963	0.0868	-0.0087	-0.2226	-0.1811	-0.9105	0.1941	-0.3548	0.0186	-0.8186	-0.2987	0.6164	-0.041	0.1622	-0.2723	0.5734	0.3494	-0.0218	0.4071	-0.0923	-0.2026	0.4709	0.2678	0.2412	0.406	0.2594	-0.0985	-0.1172
FGF21	-3.5598	-4.553	-3.77	-4.2056	-4.071	-3.4787	-4.3104	-3.5649	-3.8552	-4.6841	-4.0093	-4.3868	-4.071	-3.6188	-3.3248	-2.9214	-3.7065	-3.9885	-4.6295	-3.3076	-3.4643	-4.2626	-3.3481	-3.9748	-5.2877	-3.6841	-4.0613	-3.9977	-4.1818	-4.1456	-3.2515	-3.5129	-3.035	-3.5312	-3.2515	-3.4949	-3.6349	-3.071	-2.7959	-3.3929	-3.5942	-3.0954	-3.4998	-3.6475	-4.319	-4.3959	-3.5995	-3.2793	-4.1103
SPACA4	-0.8625	-1.6259	NA	-0.2142	-0.8783	-0.4074	0.8254	NA	NA	-1.5649	NA	NA	0.7093	0.4005	NA	-0.0469	NA	NA	NA	-0.897	-0.8494	NA	NA	NA	NA	NA	NA	NA	-4.4454	NA	NA	-0.5907	0.0101	0.3951	-0.4639	0.269	-0.6804	0.3707	-0.0043	1.0029	NA	-0.8237	NA	NA	NA	NA	NA	NA	NA
ZNF565	0.2129	-0.1844	0.1124	0.0786	-0.1681	0.4478	0.6003	0.1532	0.2253	-0.415	-0.0484	-0.0529	0.4093	-0.3328	-0.2498	-0.2775	1.0215	1.9512	-0.0291	-0.1001	0.2473	0.8106	0.9516	-0.226	0.962	0.2702	0.545	-0.2026	1.5709	0.0454	0.1349	-0.0087	-0.0559	-0.0695	-0.0574	0.4615	0.4351	0.6267	0.4147	-0.6237	0.5321	0.8805	-0.1203	0.3896	0.2485	0.5099	-0.1219	1.3879	0.2179
ZNF667	-2.0233	-2.6259	0.0827	-1.7226	-2.4189	-2.9885	-3.4517	-2.2176	-0.6967	-2.4739	-2.0116	-2.8997	-3.2934	-2.5228	-2.114	-3.3644	-1.4035	-2.1456	-2.6259	-1.3808	-0.9024	-0.484	1.5768	-4.0116	-1.6439	-3.1584	-1.9885	-2.2176	0	-2.2379	-0.5799	-3.9726	-1.9828	-1.9714	-2.2793	-1.1266	-2.1456	-1.9105	-1.5105	-2.9885	-2.5735	-0.6897	-1.6349	-3.1714	-1.2758	-2.889	-1.8059	-3.1714	-1.6171
KIR3DL2	0.8156	NA	NA	NA	NA	NA	NA	NA	NA	NA	NA	NA	NA	0.2546	NA	NA	NA	1.0179	NA	NA	NA	NA	NA	NA	NA	NA	0.8504	NA	NA	NA	NA	NA	0.0072	NA	NA	NA	NA	NA	NA	1.5869	NA	NA	NA	NA	NA	0.8797	NA	NA	NA
PTPRH	0.3369	-2.2515	-1.2584	0.9373	-4.3629	-0.4208	-3	1.4704	-0.016	-3.2243	-4.0116	-0.454	0.7303	-0.1681	-3.5632	1.8209	-1.2142	-0.1408	-3.4548	-1.2898	-1.5564	-1.2413	-1.7131	-4.319	-1.1714	-0.9686	-4.4454	-4.737	-2.3076	1.6243	-3.1329	0.3707	-4.8656	-1.0801	-2.737	-4.4173	-2.0058	-1.6943	0.2041	1.1884	-4.8489	-0.9462	-1.6259	-3.3644	-1.949	-0.5458	-0.1779	-0.3165	-1.9942
ACTN4	-0.2758	-0.4422	-0.7013	-0.5522	-0.662	-0.7298	-0.7298	-0.3492	-0.2636	-0.9105	-0.6461	-0.482	-0.7612	-0.4699	-0.8186	0.1814	-0.1203	-0.2723	-0.7959	-0.949	-0.9024	-0.2584	-0.4189	-0.8651	-0.6193	-1.2619	-0.3715	-0.6897	-0.0695	-0.1488	-1.4501	-1.041	-0.8009	-0.8651	-0.9159	-0.5105	-0.2193	-0.4189	-0.8573	-1.2723	-0.6171	0.2437	-0.9462	-0.5886	-0.7179	-0.692	-0.9024	-0.9051	-0.9686
ATCAY	-3.071	-3.3335	-3.3511	-3.1844	-3.0589	-3.0469	-2.9658	-3.0469	-3.4297	-3.2934	-3.0831	-3.0116	-2.8262	-2.8059	-2.7466	-2.6529	-3.5925	-3.2515	-2.8573	-2.9214	-2.9546	-3.2379	-2.6259	-3.1078	-3.4235	-2.9105	-3.4081	-3	-3.3959	-3.357	-3.2653	-3.0831	-3.399	-3.1714	-3.7819	-3.1584	-2.8997	-2.737	-3.4066	-2.8783	-3.1714	-3.1456	-3.2515	-3.2379	-2.9434	-3.0954	-3.1584	-3.1976	-3.2934
CLC	-0.811	NA	NA	NA	NA	NA	NA	0.1738	-1.737	NA	0.069	-2.0233	1.3791	-0.7909	1.514	1.4163	NA	0.0566	NA	NA	NA	NA	NA	NA	NA	NA	NA	-0.8339	NA	NA	NA	NA	NA	NA	NA	-1.3733	NA	0.2869	-0.486	0.5529	-0.3255	NA	NA	NA	NA	NA	NA	NA	NA
HDGF2	-1.2176	-1.4659	-1.4422	-1.5064	-1.7563	-1.2828	-1.5187	-1.5064	-0.7884	-1.662	-1.454	-0.9714	-0.8997	-1.5395	-1.4659	-1.3997	-0.7612	-1.8365	-1.7809	-1.889	-1.255	-1.2142	-1.6897	-1.0203	-1.114	-1.7131	-2.2311	-1.8468	-1.7037	-0.5649	-2.4901	-1.8943	-0.9434	-1.1811	-1.7612	-1.7612	-0.8599	-1.5564	-1.191	-1.152	-1.5437	-1.7037	-1.6394	-0.9024	-1.7084	-0.3659	-1.9942	-1.8625	-1.8211
M6PRBP1	-0.074	-0.5585	-0.6689	-0.6666	-1.4779	-0.3622	-0.6016	-0.6827	-0.5353	-1.0954	-1.0116	-0.6016	-0.1795	-0.5291	-0.281	-0.1861	0.0922	-1.1172	-0.6038	-0.6552	-0.2845	-0.221	-0.9856	-1.1746	-0.5995	-0.5799	-1.2447	-0.699	-1.2142	-0.4679	-1.0087	-1.4982	-0.6349	-1.1203	-0.949	-1.454	-0.2159	-0.8573	-0.9828	0.111	-0.5735	-0.2294	-0.7637	-0.9351	-0.8443	-0.2277	-1.3437	-0.5973	-0.6282
TSP50	1.6776	1.8282	0.6736	2.019	0.3752	1.1177	1.2504	NA	1.6897	0.6135	-0.881	0.1878	1.2179	2.0377	2.145	0.7251	-0.1746	0.4782	NA	1.8032	0.913	NA	2.6114	NA	0.6341	NA	NA	0.1519	2.0243	NA	NA	1.9646	-0.5886	0.3068	1.3039	1.0538	2.2729	3.7538	1.2546	0.4563	1.1077	NA	-0.0695	NA	2.7547	-1.5907	1.519	1.5465	NA
MRPL54	0.779	0.9123	0.4792	0.0963	0.6672	0.7207	0.856	0.852	1.1776	0.8319	1.3179	0.8984	0.7277	0.4276	0.8797	0.3907	1.0915	0.7251	0.8464	0.4447	0.4813	0.5936	-0.3548	0.606	0.7093	0.9107	0.2963	0.6763	0.2998	0.8335	0.0538	0.315	0.8335	0.9731	0.7949	0.0635	0.54	0.6079	0.6862	0.926	1.1434	0.7655	1.2963	1.0029	0.5801	0.9906	0.3584	0.4233	0.8139
FUT5	2.7874	2.6015	2.1345	1.9046	0.8758	2.4147	1.3984	3.2876	3.0759	1.3092	0.037	3.0522	2.7	1.3306	0.1204	3.4919	3.0169	2.0573	1.8343	1.6681	2.8651	2.6337	-0.5606	0.518	2.6365	1.5922	-0.662	2.128	0.6563	3.8156	0.4626	2.4136	1.9635	3.3576	1.9697	1.4552	1.5534	0.7849	1.1776	0.8278	2.005	3.0702	2.3721	1.4415	2.6805	0.3863	2.1037	1.5753	0.9237
KISS1R	-0.3346	-0.0816	-0.3111	-0.1047	0.1097	-0.1313	0.2154	0.45	-1.1779	-0.6349	-0.2898	-0.0454	-0.041	0.3696	0.3505	0.91	-1.191	-1.3255	-0.0425	0.263	0.3092	0.0635	0.1738	-0.3237	-1.4941	-0.035	-1.4228	-0.1031	-0.5692	-0.7959	-0.488	-0.4481	-0.3165	-0.0014	-0.0145	-0.4325	0.0663	-0.0604	-0.4901	-0.1456	-0.3273	-0.281	-0.2653	0.0101	-0.4016	-0.3808	-0.8651	0.281	-0.5228
SLC5A5	1.8856	1.1532	-0.4521	0.0158	0.2821	0.5499	0.7225	2.1427	-0.699	0.546	0.6012	0.5529	0.115	0.992	0.583	1.3545	0.8164	-0.4403	-0.3255	-1.1681	0.3863	-0.0439	1.3448	0.5049	0.3185	1.1322	-0.5084	0.6415	0.2203	2.0211	0.5221	0.7433	0.4308	0.4688	0.8584	0.3403	1.1077	0.7604	0.3774	0.6295	-0.1795	0.3323	0.0841	0.8319	0.1177	0.2821	0.5301	0.0243	0.926
IL12RB1	0.3741	-0.071	1.0257	0.2041	0.0115	-0.1877	-0.4344	0.1776	-0.3328	-0.6237	0.1583	-0.0116	-0.1472	0.7172	-0.0544	0.115	-0.1536	0.0786	-0.6758	1.2904	0.2066	0.546	0.294	-0.304	-0.3273	0.0922	0.622	-0.3921	-1.8943	0.4977	-0.0574	0.0745	-0.1763	0.6012	0.0635	0.0286	-0.0425	0.4255	0.0314	0.5656	-0.0087	1.1979	-0.5395	-0.2533	-0.2653	0.547	-0.3201	-0.3401	-0.484
SYDE1	-0.5907	-1.1844	0.0172	-1.2898	-1.4422	-1.3076	-1.3076	-0.8084	-0.9658	-1.1976	-0.9856	-0.9051	-0.9214	-0.771	-0.8237	-0.3364	-1.0559	-1.3328	-1.221	-0.9241	-1.3147	-0.6574	-0.4759	-1.035	-1.6038	-0.0847	-1.6082	-1.0801	-1.0831	-1.1016	-0.9024	-1.3771	-1.0174	-1.2584	-1.1172	-1.4501	-0.5458	-1.0087	-1.0954	-1.0087	-1.0862	-1.0831	-0.725	-1.0831	-0.706	-0.9942	-1.041	-0.7274	-0.6371
HPN	3.9336	3.8904	3.8258	3.2285	3.3032	3.1905	3.2396	3.3785	3.5583	3.384	4.1731	3.2663	2.0204	4.4951	3.2088	1.3945	3.8379	3.756	3.9542	3.301	1.7342	4.0505	4.9269	3.7181	3.4738	3.5373	3.4777	4.04	2.9199	2.8305	2.6278	0.5241	3.8329	4.5223	3.7845	3.7334	3.3923	4.1739	4.2772	0.4957	3.5336	2.1731	3.5957	2.9277	4.295	3.2638	3.957	3.359	2.96
ZNF14	0.7119	0.5341	0.4531	0.8213	0.7527	0.514	0.8639	-0.1156	0.6897	0.7908	0.4936	0.5869	0.5695	0.4573	0.346	-0.6781	0.3741	0.779	0.4308	0.1928	0.8254	1.1648	1.8148	0.7172	1.0022	1.3516	1.5945	0.3265	1.2209	-0.5842	1.105	1.1538	1.1395	0.5675	0.9605	1.2696	0.2485	0.7146	0.886	0.5251	0.9657	0.669	0.4875	1.0222	0.7723	0.9664	1.1184	-0.4247	0.4823
ACOX2	2.0834	2.2163	1.8488	1.4356	2.4255	2.1266	0.9891	0.545	1.4962	2.1506	1.8412	2.6924	1.8805	1.642	1.3265	-0.8916	1.4787	-0.4739	1.7778	1.9138	2.2878	1.9294	1.051	3.6415	0.9153	2.5148	0.2029	2.7822	0.779	0.7355	1.1622	5.3205	3.0995	2.6489	1.5729	2.9729	0.6826	1.5484	1.6727	0.5251	2.4465	1.5023	1.7841	1.1329	3.557	1.6253	4.0721	0.9957	2.6147
EDG4	0.9373	0.0759	0.4038	0.406	-1.0469	0.852	0.03	1.1693	0.184	0.0342	-0.3401	0.9561	1.0656	-0.2758	-0.2671	0.3242	0.6369	-0.2934	-0.3902	-1.1392	1.0029	0.9449	-0.3328	0.1878	0.4038	0.0272	-1.7612	-0.7013	-0.0247	0.9833	-0.692	-0.3183	-0.0306	0.0922	-0.3677	0.1712	0.5489	-0.5374	-0.255	0.6257	-0.3255	0.2437	-0.8443	0.2425	0.2928	0.9546	-1.5064	-0.8573	-0.9187
FBXO17	-2.4035	-3.4204	-2.9324	-3.6841	-3.6135	-4.0979	-3.2243	-3.1329	-2.6349	-2.1203	-3.4965	-3.6953	-3.6082	-2.4422	-2.8468	-3	-2.8783	-3.9479	-2.6439	-2.889	-4.2324	-2.3364	-2.4739	-3.1456	-2.699	-1.3622	-3.2243	-4.0905	-3.071	-2.5146	-3.1976	-4.5395	-2.662	-3.8427	-3.0954	-2.8783	-2.3219	-3.8826	-3.1203	-1.9214	-4.0734	-3.5262	-2.9771	-3.1203	-2.0954	-3.968	-4.1153	-2.6712	-2.4739
FBN3	-0.0365	0.3369	0.0426	0.3196	0.0115	0.5341	0.5984	0.2951	-0.4442	-0.0365	0.6951	0.4415	0.4168	0.5069	0.9396	1.4005	0.1204	-0.2881	0.2363	0.5099	0.301	0.2041	1.0614	0.512	-0.6643	0.4125	-0.4461	0.2412	-0.4247	-0.0189	-0.221	-0.0939	0.2079	0.434	0.1789	0.0229	0.5734	0.9046	0.3685	0.3852	0.4542	-0.1536	0.2666	0.3403	0.3323	0.2987	-0.1016	0.5028	0.2618
APC2	-2.5064	-3.8079	-2.9658	-3.9546	-2.9546	-3.7602	-3.0954	-3.6439	-4.1923	-3.4965	-3.3703	-2.7859	-3	-2.9771	-2.7084	-2.6082	-3.5228	-3.8427	-1.5649	-3.3076	-3.1203	-3.2109	-2.5479	-3.5995	-3.6367	-2.3511	-2.7084	-3.3868	-3.8201	-3.7293	-3.035	-3.7919	-4.0303	-3.1976	-3.2515	-3.2793	-3.1456	-3.3823	-1.8365	-3.035	-3.2379	-2.7179	-2.0831	-3.4081	-3	0.473	-2.0529	-3.3496	-1.5395
SEZ6L2	-0.0425	0.0272	-0.1266	1.1557	-0.1109	-1.7859	1.846	-0.2142	0.538	-0.6416	1.0129	-0.7202	0.91	-0.0321	-0.7884	-0.5458	-0.0985	-1.3846	-2.2243	0.8229	0.1454	0.719	-0.2828	-0.0454	1.2479	-0.3827	-2.6897	0.5859	-1.0679	-0.1552	-1.462	1.5465	1.2564	0.0129	-0.417	1.5617	-1.6897	0.4936	-0.6016	-0.706	-0.0695	-1.3076	-0.3846	-0.5105	1.2576	0.7799	0.4372	-0.1345	-0.4739
ARL5A	1.1706	0.433	0.364	0.5878	0.4751	0.3818	1.0007	0.6581	-0.2413	0.5519	1.3956	0.0058	0.301	0.5974	1.0405	-0.5332	0.2833	0.511	1.1375	0.7022	0.5588	0.5917	1.5543	0.2666	0.7849	1.2277	1.884	0.929	0.8024	0.394	1.4839	0.2179	0.1204	0.0215	0.4093	0.52	0.5039	1.0065	0.9411	0.0786	1.067	0.4813	1.0461	-0.0801	1	-0.2775	1.513	0.7172	1.2029
MDH1	-0.5146	-1.0029	-0.7539	-0.5416	-0.9658	-1.3219	-0.9856	-1.0203	-1.3696	-0.48	-0.6371	-0.776	-0.2653	-1.0923	-0.3219	-1.1047	-1.2076	0.1776	-0.5692	-0.5842	-0.5606	-0.7834	-0.9351	-0.4679	-1.458	-0.074	0.4436	-0.6643	0.1309	-1.6349	-0.3548	0.4319	-0.4719	-0.776	-0.9024	-1.0589	-1.2243	-1.221	-0.6529	-0.7418	-0.55	-0.2934	-0.4112	-1.0469	-0.7563	-0.7418	0.696	-0.0395	-0.0439
ZFP36L2	2.5266	2.5821	2.1227	3.384	2.9984	3.4436	3.2912	4.7159	1.6406	3.3923	3.175	2.2452	2.6048	4.1408	3.6404	4.0479	2.0254	2.9666	2.4857	3.3743	2.7055	2.8416	2.957	3.2632	2.4209	2.281	3.5656	2.1326	4.3023	3.1881	2.7763	1.9808	2.3948	2.9163	4.4568	3.7655	2.4854	3.214	3.0344	3.6993	2.4497	2.4544	2.7416	2.4797	3.2639	1.5888	3.2051	2.6902	3.3868
CAPN13	3.0222	5.0378	1.842	4.406	1.9084	0.7476	2.839	1.159	3.9364	2.101	2.3205	4.6035	5.3136	0.3863	0.9598	-0.191	3.2504	2.278	0.4854	1.8319	4.2935	1.9452	-1.1976	3.1421	2.2461	2.5457	-1.8314	1.0172	2.148	2.058	-0.4481	6.1404	-0.567	1.4792	1.7124	2.019	2.1003	1.7949	1.4255	-0.2345	1.6415	4.4216	3.7236	1.6485	4.1416	-0.1536	2.5644	3.4101	4.0942
MARCO	3.6611	3.9745	3.6041	4.0704	3.8934	3.007	4.0985	4.2296	2.9271	3.4155	3.9345	2.1437	4.101	3.7192	4.4731	3.0796	3.0628	3.2904	4.2456	4.5404	3.8063	3.2887	3.5286	3.7355	3.0254	1.8867	3.1341	3.9672	3.0748	3.2708	3.3561	3.5583	3.5509	3.8728	3.84	3.7038	4.0144	4.1506	3.585	3.6781	3.9644	2.211	3.9955	3.8953	4.0968	2.9258	3.4607	4.6781	3.9782
CXCR4	3.5656	3.2411	2.5474	3.4476	2.5283	1.7044	3.0025	4.0583	2.9428	4.7876	4.1867	1.7053	2.8754	5.1123	3.8063	2.5127	2.7236	3.9828	2.2573	2.9394	2.3092	4.106	0.8695	3.5286	3.2558	2.8789	4.5916	2.2848	4.9528	3.8866	3.2123	1.9738	2.5008	1.5326	5.4502	3.5398	3.6346	2.8928	3.9307	4.1667	3.6758	2.6304	3.2775	3.1939	2.8294	2.6337	2.2473	3.2698	3.3576
KIAA1189	0.7459	-0.5564	1.4563	1.2085	1.3791	NA	1.3646	1.3127	0.9753	1.5211	0.3448	1.7879	0.7084	2.0847	1.7373	0.2216	0.0922	NA	NA	1.2473	NA	1.1057	NA	0.4027	1.2104	3.3674	2.3956	NA	1.5395	0.1309	2.2268	-1.5187	0.0029	1.3242	1.4998	1.9694	0.7553	2	0.3896	1.6036	1.3674	0.4792	-0.4442	0.9007	0.9153	0.6924	NA	NA	1.9149
COQ10B	0.1953	-0.1504	-0.3255	-0.8009	-0.3456	-1.0321	-1.3183	-0.456	0.8303	0.9899	-0.6193	-0.6967	-0.8084	-0.7834	-1.4739	-2	1.3868	-1.0321	-1.0291	-2.1779	0.0115	-0.0365	-1.8625	-0.2092	1.412	-0.2793	-0.1424	0.1519	-0.6758	1.107	0.0538	0.9899	-0.1345	-0.5799	-1	0.2987	-0.8391	-0.8059	-0.1649	0.5271	0.5558	-0.6574	0.03	0.0745	-0.2602	0.3951	1.0929	-1.3622	-0.4659
MATN3	0.8852	3.1067	1.9957	0.8647	0.7799	-1.2758	1.3098	0.6229	2.7262	3.7104	2.3414	0.8914	3.0076	-0.3603	0.8608	2.0597	3.3827	-1.1266	1.1395	3.8777	1.7097	1.1421	1.1941	3.5656	3.2824	5.5717	3.7602	0.2618	2.4139	1.3351	2.5278	1.2702	1.3208	NA	4.1383	2.1286	2.56	1.0841	1.3757	1.9675	1.3045	0.1903	4.5844	4.3695	2.244	NA	1.9218	0.1454	3.0966
HAS2	2.8842	0.1648	2.8608	1.7062	2.4678	0.751	0.9015	2.9115	2.0597	4.1763	2.1	0.4626	2.1903	2.4014	1.5602	0.0621	2.8215	1.1097	0.1349	1.6055	-1.1361	3.8904	-1.4266	1.5145	1.9734	2.7485	2.7893	1.4093	3.5223	2.8709	1.7845	NA	0.5351	-0.5437	3.9819	2.6436	1.7912	0.6915	3.1194	-0.0559	1.8111	2.2519	3.3048	-0.5043	2.6565	2.2627	2.2197	2.068	3.943
SSFA2	0.8294	0.0454	-0.2498	0.184	0.123	0.4372	0.157	1.2382	-0.6461	0.511	0.2916	0.3829	-0.1313	0.123	0.5636	2.4919	0.2904	-0.3219	0.1283	0.852	-0.013	0.1635	0.3651	0.4626	0.275	0.6617	0.636	0.5811	0.3196	0.7251	0.518	-0.2845	0.1467	0.2916	0.6581	0.4168	-0.0454	0.8836	0.2928	0.3334	0.6126	1.0621	0.9935	-0.4325	0.0704	0.8624	0.8616	0.4709	0.9731
BOLL	0.6116	NA	NA	NA	NA	NA	NA	NA	NA	NA	NA	NA	NA	NA	NA	NA	NA	NA	NA	NA	NA	NA	NA	NA	NA	NA	NA	NA	NA	NA	NA	NA	-0.0043	-0.852	-0.0087	NA	NA	NA	NA	NA	NA	NA	NA	NA	-1.0203	NA	-0.173	NA	NA
TUBA1	-0.5564	-1.4501	-2.1329	-1.3921	-2.1976	-1.7563	-1.4461	-0.7155	-0.6215	-1.3183	-1.8365	-1.5146	-0.897	-0.6529	-1.415	-0.6439	-0.4961	-1.8943	-1.0801	-1.3111	-1.1584	-0.9714	-1.9942	-1.1844	0.0649	-0.9743	-1.6304	-1.1297	-1.7909	-0.5886	-0.2362	-1.1552	-1.0321	-1.5735	-1.3511	-1.1552	-1.6439	-0.8339	-1.5649	-1.0529	-1.2379	0.3242	-1.1844	-0.8009	-0.606	-1.1649	-1.6171	-0.1472	-1.0203
SLC2A13	0.1865	0.8906	0.6645	1.3004	0.6862	-0.1779	0.6772	1.067	0.6844	0.0841	2.3479	1.3907	1.1303	0.9993	1.3098	0.7816	0.2179	1.8852	3.2838	1.0335	0.3277	0.5539	1.6951	0.5089	-0.038	1.2963	0.263	2.4008	0.4865	0.7355	0.281	-0.8365	0.9069	3.7527	0.8106	1.0724	0.9964	1.3482	1.6017	1.434	2.3876	0.7476	0.8828	1.338	0.0482	1.168	0.9804	1.2618	0.9138
WNT10A	-0.3715	-0.1001	-1.9379	-1.0499	-2.2109	-2.5907	-0.3789	-0.7661	-1.2277	-0.4364	0.2534	-2.1714	-1.6215	0.542	-0.4325	-1.3884	1.6443	-0.662	-1.1329	0.2191	-1.2793	-1.6349	-1.5437	-0.9714	0.1801	-0.6574	-1.4035	-2.3959	-0.7394	-1.0679	-1.3921	-2.5479	-1.2481	-2.1392	0.0144	-1.3111	-0.9914	1.3595	-0.699	-2.0529	-0.1665	0.7198	-0.7686	1.3346	-1.9269	-1.0233	-2.8678	-0.6781	-1.3808
ARPC2	0.4782	-0.0574	0.0922	0.4885	0.517	0.2774	0.1801	0.4093	0.0538	0.0868	-0.0101	0.2678	0.4005	0.338	0.8945	-0.0847	0.6627	0.1454	0.0813	0.541	-0.1943	0.2998	0.0356	0.2412	-0.304	0.5331	0.3448	0.4372	0.3391	0.2833	0.6406	-0.6193	-0.0484	0.144	0.2522	-0.1234	0.184	0.5351	0.0186	0.4468	0.4823	0.6808	0.6608	0.2327	0.8237	0.5714	-0.7226	0.7111	1.0614
FAM82A	1.4916	1.5936	0.8961	1.1467	2.5575	0.8655	1.9226	1.5714	1.4	2.3796	1.5271	0.7527	1.7242	0.9351	2.0841	-0.2584	1.7672	1.6889	1.8612	1.5415	0.6031	2.0381	1.6503	2.3494	0.8999	0.6229	1.4367	2.5393	1.7312	1.46	1.2916	3.1436	3.3618	3.092	2.2836	2.577	0.6808	1.6636	1.5301	0.543	2.2144	1.4662	2.3176	1.629	3.091	1.2815	2.4436	1.1596	1.5912
CPO	NA	1.5341	NA	NA	0.1609	1.4436	0.1519	NA	0.9107	0.4834	NA	0.3494	0.4168	NA	NA	NA	NA	0.3774	0.3663	0.605	NA	0.4158	NA	NA	0.8049	NA	NA	0.5578	NA	NA	NA	1.4158	0.0072	0.5945	NA	NA	-0.0939	-1.0801	NA	NA	0.0257	NA	1.6512	1.2636	1.254	NA	NA	-0.417	NA
MAP4K4	-0.8757	-1.2969	-1.0116	-1.2584	-1.3846	-1.221	-1.2447	-1.2828	-1.2076	-2.1714	-1.6758	-1.3959	-1.4501	-1.0029	-1.462	-0.9914	-0.8916	-1.6439	-1.1456	-0.8546	-1.5479	-0.7037	-3.735	-1.852	-1.4901	-1.5735	-1.7515	-1.6259	-1.0954	-1.0923	-2	-1.6897	-1.191	-1.5064	-1.685	-1.8009	-1.255	-1.5951	-1.7909	-1.0954	-1.3846	-0.9658	-1.6082	-1.8943	-1.0619	-1.5692	-0.6873	-0.8365	-1.0923
MSH6	-1.3622	-1.8314	-1.5522	-0.6666	-1.5312	-0.606	-1.5146	-2.4739	-1.3474	-1.6666	-2.071	-0.4189	-1.699	-1.9105	-1.9105	-1.9434	-1.7179	-0.5564	-1.4501	-1.949	-1.2793	-1.8059	-0.1472	-1.8997	-1.9214	-1.1047	-0.6735	-1.4422	-0.6735	-2.7661	-0.9942	-1.1584	-1.6171	-1.7809	-1.7515	-2.0954	-1.5692	-1.4461	-1.4982	-2.1392	-1.3076	-0.7037	-1.8417	-2.3959	-1.3147	-1.3076	-1.191	-0.3603	-1.077
SNRPG	0.5578	0.0328	0.2339	0.3685	0.3863	0.848	0.4668	0.0201	0.107	0.0566	0.5499	0.9561	0.3885	0.1966	0.4709	0.6654	-0.0589	1.2296	0.6987	0.0759	0.384	0.2714	0.9107	0.0759	0.0976	1.3488	1.7698	0.6853	1.0922	-0.5312	0.844	1.1104	0.4158	0.1097	0.0342	-0.3255	0.1084	0.8303	0.3505	0.7146	0.7347	1.1382	0.2461	-0.2916	0.3323	0.547	1.1538	0.8821	0.6489
39148	0.3516	-0.7322	-0.3603	-0.6416	0.3219	0.103	-0.074	-0.6282	-0.3328	0.4657	-0.3474	-0.5564	-0.456	-0.4112	-0.3474	-1.3959	-0.1795	-0.4016	-0.4055	-0.5821	0.148	0.1137	0.2029	0.1401	0.1557	0.5627	0.5089	-0.243	-0.0365	-0.3129	0.1738	0.6406	-0.4921	-0.6552	-0.2688	-0.2706	-0.0725	0.1322	-0.1763	0.058	0.4179	-0.3659	0.0731	-0.949	-0.3094	0.1336	0.8098	0.1953	0.2928
MRPL53	-0.3273	-0.2671	0.0881	-0.2863	-0.2706	-0.1649	0.175	0.1801	-0.1552	-0.0589	-0.0291	-0.0233	-0.3419	0.189	0.0384	0.1865	-0.3219	0.2881	0.4563	-0.2863	-0.0649	0.1401	0.2054	-0.2243	-0.16	-0.0014	0.1801	0.2029	0.3242	-0.2042	0.33	0.2079	0.2606	-0.5929	0.0129	-0.2951	-0.1408	0.3103	-0.0484	0.3092	0.0621	-0.0439	-0.1697	0.0144	0.1257	-0.1203	0.542	0.2004	0.0663
MRPL19	-0.6666	-0.9324	-0.6349	-1.0262	-0.685	-1.1047	-1.0985	-1.3076	-1.5778	-0.9159	-0.6735	-0.5692	-1.1456	-1.0469	-1.0058	-1.0862	-1.4422	-0.6484	-0.3292	-1.0439	-0.4719	-0.9078	-0.8237	-0.8262	-1.3997	-0.2515	-0.6104	-0.5543	-0.417	-1.9434	-0.0816	-0.1844	-0.9885	-0.6282	-1.1714	-1.3183	-0.6781	-0.5564	-0.6804	-0.7298	-0.394	-0.3076	-0.6171	-1.4305	-0.6394	-0.4719	0.2582	-0.48	-0.462
DPP10	NA	2.2296	NA	0.7527	NA	1.2774	NA	NA	1.5236	NA	NA	0.1362	NA	NA	NA	NA	1.0447	NA	NA	NA	NA	NA	NA	-1.3255	NA	NA	NA	0.9942	NA	NA	NA	-0.5084	-0.4305	NA	NA	-1.462	0.119	NA	0.1648	NA	NA	NA	-0.5886	-1.5864	NA	NA	NA	NA	0.1204
LHCGR	NA	NA	NA	NA	NA	NA	NA	NA	NA	NA	NA	NA	NA	NA	NA	NA	NA	NA	NA	NA	NA	NA	NA	NA	NA	NA	NA	NA	NA	NA	NA	NA	0.0014	NA	NA	NA	NA	NA	NA	NA	NA	NA	NA	-0.6712	NA	NA	NA	NA	NA
BANK1	3.7814	1.8711	3.3491	3.5801	3.6171	0.9855	3.7236	4.3154	2.7536	4.7682	3.366	3.5072	3.4751	4.8384	3.9279	0.9753	3.366	3.6713	3.5668	2.6998	3.4983	3.7485	1.8262	3.4087	3.9098	5.1579	5.1719	4.9814	4.5981	3.359	3.3306	0.6154	1.4362	2.6895	5.4744	3.3203	2.9443	2.3294	4.9528	3.3219	5.0836	4.1522	4.1659	2.9753	1.6563	4.135	1.4787	4.2698	3.6041
NUP35	-0.889	-0.9132	-0.5886	-1.2009	-0.1266	-0.7155	-0.454	-0.7539	-1.2243	-0.3902	-0.6349	-0.3902	-0.4659	-0.897	-0.9241	-0.8135	-1.685	-1.4266	-0.3076	-0.9518	-0.3129	-0.8314	0.5888	-0.0755	-1.038	0.3918	-0.2688	-0.2142	-0.5864	-1.5522	0.7049	-0.1297	-0.2109	0.3685	-0.5864	-0.6148	-1.3808	-0.1877	-0.8417	-0.5458	-0.4228	-0.8084	-0.1681	-1.0499	0.0286	-0.5628	0.3685	-0.6873	-0.4921
CHST10	-1.9602	-1.4659	-0.7809	-1.2898	-1.6666	-1.7563	-1.9546	-2.5564	-1.6529	-1.7037	-1.9828	-0.9187	-1.8009	-1.3921	-2.3076	-1.9434	-0.8135	-2.4501	-1.662	-2.1976	-2.1844	-1.2076	-0.5951	-1.0954	-2.2042	-3.5362	-2.9214	-1.7909	-1.2619	-1.7226	-2.5395	-1.0529	-1.0559	-0.7661	-1.7809	-1.1488	-0.8468	-1.9159	-2.0116	-2.1976	-1.8468	-2.6349	-2.6259	-0.9828	0.3674	-0.415	-2.1844	-2.6259	-2.3733
NGEF	-0.7274	-1.6943	-2.6439	-2.662	-4.699	-2.7859	-2.2311	0.4865	-0.8943	-2.8365	-4.1329	0.6736	0.2327	-1.462	-3.3076	-0.0145	-0.071	-1.8678	-4.1844	-1.6038	-2.2793	-0.8211	-0.0725	-3.735	-0.3094	-1.0499	-2.816	-2.6259	-2.4901	-0.0877	0.7058	1.3144	-4.6118	-2.0291	-1.9771	-1.737	-3.1976	-2	-5.0979	-1.0087	-2.8059	-0.077	-1.077	-1.4501	-0.4679	-2.7084	-0.3201	-1.255	-2.8468
SLC40A1	4.6264	3.9709	3.373	4.0117	4.588	0.7013	4.1293	5.1177	3.433	4.1985	4.8758	1.5356	3.9514	3.9809	5.6441	5.1514	3.757	3.4087	4.3399	4.6282	3.8166	4.5975	4.5686	4.1285	4.2935	5.1667	5.1743	4.673	4.1811	4.4141	3.256	1.0279	5	4.8545	5.2192	3.6679	3.9011	3.5945	5.4806	3.2557	5.7175	3.3561	5.6982	4.7586	4.067	3.9919	6.8392	4.6094	5.4039
CCT7	-1.5228	-1.6304	-1.5395	-1.7274	-1.852	-1.8625	-2.1392	-2.152	-1.2969	-1.811	-1.8997	-1.7274	-1.7809	-1.9159	-2.1266	-1.7859	-1.038	-1.6171	-1.873	-2.3884	-2.114	-1.889	-1.9324	-2.114	-1.3076	-1.7466	-1.6304	-2.1649	-1.7466	-1.5353	-1.9942	-1.6804	-1.9434	-1.4189	-2.1649	-2.3219	-1.6215	-1.7418	-2.0529	-1.8417	-1.9159	-1.5187	-2.1392	-2.3364	-1.771	-1.2009	-1.811	-1.9658	-1.699
PLEKHA3	0.8448	-0.0893	-0.2793	-0.6082	0.1204	-0.304	-0.016	-0.1552	-0.9078	0.4563	0.03	-0.456	-0.4481	-0.1203	-0.243	-0.7834	-0.6529	-0.3492	-0.2793	-0.1633	-0.1187	0.2774	-0.6529	0.1401	-0.1203	0.4761	0.2302	0.4957	-0.041	-0.9771	0.6182	1.0065	0.1532	-0.2498	-0.0439	0.3068	-1.1234	-0.2934	0.1349	-0.1763	0.0922	-0.5649	0.4854	-0.5585	0.3528	-0.4719	0.9862	0.0384	-0.2447
CCT4	-1.8262	-2.1779	-1.7809	-1.8943	-1.9269	-2.1078	-2.3585	-2.5649	-2.0893	-1.9051	-2.152	-1.8365	-2.0174	-2.3808	-2.0174	-2.6259	-2.1203	-1.5606	-1.8783	-2.2447	-2.1714	-2.2653	-1.5995	-1.9051	-2.2863	-1.5907	-0.7013	-2.191	-1.4739	-2.8468	-1.6171	-1.2345	-2.1456	-2.2793	-2.4189	-2.5479	-2.2311	-2.0831	-2.2515	-2.3959	-1.816	-1.3364	-2.0954	-2.4982	-1.949	-1.7809	-1.4699	-1.3959	-1.3511
ASTL	-0.0189	0.1467	-0.16	0.0342	0.2166	0.2821	0.1916	0.4222	-0.606	-0.5332	0.2534	0.4988	-0.0831	0.3752	0.541	0.962	-0.3921	-0.2481	0.1776	0.2129	0.1388	0.0356	0.52	-0.2533	-0.6689	0.4772	-0.7809	-0.0014	-0.3921	0.2845	0.0328	-0.3401	-0.2706	0.1454	0.2004	-0.3677	0.1124	0.338	0.0115	0.8383	-0.074	0.037	0.0813	0.2129	0.3208	0.2116	-0.1993	0.2004	-0.4247
INSIG2	0.7093	0.144	0.1814	0.4201	0.52	0.6663	0.4114	0.0607	0.1979	0.9568	-0.0589	0.2116	0.346	-0.1504	0.2473	-0.484	0.5059	0.0524	-0.8678	0.0086	0.6248	0.1635	0.1712	1.0058	0.8711	0.5231	0.2485	1.3397	0.2154	0.6443	1.3074	0.9753	1.2654	-0.4521	0.4457	0.6388	-0.1172	-0.2775	0.9207	-0.0336	0.5018	-0.304	0.5588	0.2857	1.0029	-0.1109	0.4168	0.9546	0.2449
FLJ37440	0.7883	-1.5437	0.0496	-0.2845	-1.3401	0.9971	-1.7084	-1.0985	1.294	-0.9885	-0.6529	1.2672	-0.5543	-0.527	-0.7322	-0.8916	0.2388	-0.8009	-0.9324	-1.7466	-1.4305	-0.9132	1.3471	-1.4941	-1.2653	-0.4501	-0.3997	-1.6439	-0.3219	-1.6394	-1.3696	-1.4739	-0.3603	-2.071	-0.5043	-1.2109	-0.4739	-1.5735	-1.2142	-0.9324	-0.3771	-0.4208	-1.1877	-0.6873	-0.8678	-0.5249	-0.7784	1.1322	-0.1926
MSH2	-1.7859	-2.5821	-1.4501	-1.2828	-1.8678	-0.6897	-2.0291	-1.9714	-1.0954	-1.8262	-1.9714	-0.6827	-1.5821	-2.2793	-2.5995	-1.9159	-1.9324	-0.4901	-1.5864	-2.191	-1.2584	-2.5479	0.1545	-1.5864	-2.3733	-1.1779	-0.5084	-1.9942	-1.1109	-2.6439	-1.8997	-1.7226	-1.6215	-1.9434	-1.8417	-2.3147	-1.5395	-1.4383	-1.3959	-2.3511	-1.2277	-0.6666	-1.2653	-1.852	-1.737	-1.2413	-0.5951	-0.8211	-1.6484
CTLA4	2.5432	1.0129	NA	1.7811	1.082	0.1878	0.9538	0.636	1.606	1.487	2.0607	1.0286	2.3735	1.585	1.827	0.0412	1.5415	3.406	NA	3.0133	-0.0365	1.5768	NA	0.8464	3.0626	1.9819	3.9467	0.2179	2.1577	0.6164	2.4383	NA	0.7364	NA	1.7912	2.4727	0.9486	2.1509	2.2379	2.9001	3.4568	3.0186	1.3202	0.4383	1.6093	2.9842	NA	NA	1.9157
C2orf18	0.0759	0.069	0.0314	0.537	0.119	0.4362	-0.0695	0.512	-0.1125	-0.2243	0.1979	0.315	-0.1001	0.0922	0.9957	0.7816	0.2327	0.45	0.103	0.2339	-0.0174	-0.5756	0.1966	-0.304	-0.1408	-0.1488	-0.4247	0.1309	0.0014	0.2485	0.4404	1.2363	-0.1001	0.1699	-0.46	-0.0262	0.4233	0.3629	-0.0664	0.7596	0.1519	0.0144	0.3973	-0.394	0.7321	-0.1649	1.0786	0.2154	0.3045
SLC5A6	-1.2584	-1.816	-1.873	-1.5395	-2.2515	-1.5437	-2.1456	-2.3076	-1.7274	-1.9105	-1.9546	-1.3219	-1.699	-1.7859	-2.1329	-1.5692	-1.5023	-2.0954	-1.8997	-2.699	-2.0291	-1.8836	-0.6394	-2.0529	-1.6484	-2.9105	-2.9324	-2.2311	-1.3076	-1.7131	-2.3219	-2.3808	-2	-1.5105	-2.4501	-1.9942	-1.9269	-1.8836	-1.8211	-2.152	-2.4422	-2.3659	-2.776	-2.2515	-1.1424	-1.5479	-1.9546	-2.5995	-2.2653
PDE6D	-0.737	-1.074	-0.46	-0.897	-0.5995	-0.9024	-1.304	-1.2688	-0.1536	-0.6943	-0.9187	-0.1877	-0.3548	-1.1943	-1.1649	-2.1456	0.0014	-0.8783	-1.415	-1.6215	-1.1016	-0.6643	-1.5146	-0.6038	-0.3511	-0.4719	-0.226	-1.0985	-0.9324	-0.3511	-0.9269	-1.6349	-0.8546	-1.5187	-1.4422	-0.7661	-0.6439	-0.9434	-1.0923	-1.041	-0.7155	-0.5479	-0.8443	-0.5479	-0.6439	0.2762	-0.9051	-1.0559	-0.7661
SPTBN1	-0.0816	-0.1282	-0.2671	0.0043	0.1336	-0.077	0.1362	1.5069	0.2473	0.6369	0.3962	-0.2863	0.0356	0.308	-0.2567	1.6257	1.2863	0.3663	0.1928	0.5656	0.5331	-0.0014	0.2351	0.4038	0.2857	-0.46	0.8969	0.7294	0.4212	1.7233	-0.2311	-0.1094	0.0552	0.2582	0.5811	0.3103	0.2869	0.542	0.4297	0.1375	0.1388	-0.0306	0.9268	-0.0831	0.8703	-0.3346	1.0398	0.1583	-0.1031
AFTPH	0.4158	0.7983	0.338	0.6406	1.1947	0.1124	0.7757	1.0868	-0.1665	0.9523	1.2023	0.5936	0.3539	0.512	0.6341	1.0293	-0.0514	1.9753	1.4022	0.6425	1.1712	0.4049	0.8472	0.8229	-0.1424	0.5341	1.4335	1.3161	1.3248	0.2265	0.6526	1.8359	1.1454	1.4962	1.251	0.9906	0.1878	0.8805	1.3522	1.101	0.9366	0.9456	1.4233	0.2594	1.0834	0.3045	2.2813	0.7672	0.6978
MALL	0.4967	1.8347	0.8024	0.517	0.9891	0.8383	1.0607	-0.9159	1.7999	0.8303	2.8912	-0.5543	1.0468	-0.5564	-0.897	0.5685	1.3746	-0.7202	1.7609	-0.2447	2.2762	0.809	-3.1078	2.8274	0.384	0.7841	0.103	1.4552	-0.7934	0.8647	0.2437	1.0566	2.5208	1.8516	-0.1203	2.1792	0.0718	1.3516	0.6406	-4.1354	0.364	-0.0454	0.8286	1.067	1.7727	-1.3255	0.6135	0.3785	-0.897
SLC2A4RG	-0.0469	-1.776	0.8375	-0.1345	-0.5043	-0.7686	-0.3789	-1.3076	-0.8059	-0.5332	-0.9132	0.4875	0.0412	-0.4739	-1.1047	-0.9324	-0.7155	-0.8625	-0.5543	-0.3292	-0.8391	-0.3456	0.7991	-0.5105	-0.5249	-0.9856	-1.4779	-1.5023	-0.771	-1.2863	-0.8009	0.1336	0.099	0.9404	-1.1943	-0.2969	-0.2009	-0.2362	-1.4112	-0.7959	-1.6574	-0.3548	-1.7661	-0.7179	-0.9714	0.3929	-1.2311	-0.6758	-1.1266
C20orf24	-0.2845	-1.0954	-0.8573	-0.0529	0.0895	-0.5735	-1.5995	-1.0469	-0.7274	-0.811	-1.2723	-1.1266	-0.9942	-0.9828	-0.6897	-0.5043	-1.2969	-0.1697	-1.2934	-1.1552	-0.6259	-0.221	-1.4266	-1.3771	-0.5692	-0.8084	-0.3622	-0.7539	-0.5564	-1.1361	0.5211	-0.816	-0.9686	-1.9324	-1.415	-1.4941	-1.5312	-0.7686	-1.1617	1.0642	-1.0203	0.2339	-1.0831	-1.0499	-0.9828	-0.7084	-0.1665	-0.1001	-0.6171
WISP2	1.9015	2.7495	0.9978	2.2363	-0.8704	-0.7394	2.1638	0.9642	2.0076	3.275	1.4372	1.1257	0.9913	2.9071	3.0465	1.1421	1.4983	2.1686	0.0936	3.0854	0.7424	2.849	0.123	1.6727	1.7916	3.796	1.0766	0.7004	2.4753	1.6821	2.9568	-0.811	1.9191	-0.3884	2.7755	1.6731	2.7342	1.8821	0.8734	2.808	-0.5312	0.4016	2.1731	3.3547	2.7547	-1.9602	0.8813	2.2458	1.9594
MATN4	-0.5187	-0.3902	-0.662	0.037	0.044	0.7381	0.6098	0.1953	-0.2723	-0.3585	0.3984	-0.0203	-0.2533	0.3874	0.5361	1.543	-0.5522	-0.2584	0.8758	0.7058	0.7277	0.5028	0.8576	-0.3076	0.0759	-0.226	0.2154	0.4394	0.5859	-0.3183	-0.3715	0.3907	0.3674	1.488	0.4425	0.7207	-0.0365	0.7613	0.1084	0.4573	1.0186	0.2998	-0.462	0.5636	0.5261	-0.0233	-0.226	0.0468	0.0841
WFDC6	NA	NA	NA	NA	NA	NA	NA	NA	0.3818	2.3202	NA	NA	NA	NA	NA	NA	NA	NA	NA	NA	NA	0.2141	NA	NA	2.2549	NA	NA	NA	NA	NA	NA	NA	NA	NA	1.6929	NA	NA	1.0847	NA	NA	NA	0.2277	NA	NA	NA	NA	NA	NA	NA
MGC4294	0.4761	-1.699	1.4688	-0.0786	-1.5606	-0.771	-0.6943	-2.4035	0.696	-2.3733	-3.2379	0.3196	0.6708	0.6727	-0.4659	1.0738	-0.6282	-1.7179	0.0649	1.9038	-0.5692	0.3663	0.0524	-2.0831	-0.8836	-0.013	-2.1078	-1.7909	-2.7179	-1.3846	0.8213	-2.482	-1.5353	-2.2584	-1.2076	-0.7346	0.9694	-1.8468	-1.3255	-0.9462	-1.1266	-1.3255	-1.2934	-0.7274	0.0029	-1.9434	0.9679	4.126	0.5499
DEFB129	-0.458	0.5519	0.4626	0.0014	1.2987	0.5714	1.2351	-0.2688	-0.4016	0.7874	1.058	1.2085	0.08	0.4179	0.7128	1.037	0.2987	0.5743	0.6672	NA	2.2132	1.1972	1.0538	-0.0439	NA	0.2881	NA	-0.5606	NA	-3.6367	0.7294	0.8392	-0.417	0.338	NA	0.7916	1.3863	0.546	NA	0.7596	1.9271	1.0663	0.3161	0.8624	NA	0.9358	NA	-0.1795	0.3595
SNPH	-1.0893	-1.2515	-2.482	-2.3808	-2.1329	-3.1329	-2.3292	-1.9269	-2.2109	-1.5146	-1.8262	-2.7563	-1.5864	-0.9078	-1.5146	-1.2969	-1.527	-2.8365	-1.8836	-1.5023	-2.737	-1.4659	-2.9658	-2.482	-2.0233	-2.7859	-3.1203	-2.816	-2.1844	-1.9324	-2.071	-0.7346	-2.6897	-2.2793	-1.6804	-0.7784	-1.8573	-2.1976	-1.0174	-2.0649	-2.0291	-1.9658	-1.6712	-2.0893	-0.9602	-2.0649	-2.2042	-2.1844	-2.0174
SMOX	-0.2059	-0.3827	-0.692	-0.46	-0.9324	-0.3715	-0.8757	-0.4189	-0.4403	-0.7108	-0.949	1.0731	-0.4016	0.0786	-0.9714	0.0412	-0.6326	-1.0087	-1.074	-0.6394	-0.0619	-0.0058	-1.2076	-1.3219	-0.6484	-0.9462	-1.8009	-0.9434	-0.7959	0.543	-0.2109	-0.0908	-1.6304	-1.5649	-1.2009	-0.8573	-0.7155	-1.0559	-1.2515	-0.2987	-1.0862	-0.6597	-1.415	-1.2447	-1.1361	-1.1361	-0.8314	-0.6873	-0.9078
CGI-09	-1.2176	-1.486	-1.9105	-2.0116	-1.1552	-1.6758	-1.486	-1.6439	-1.6758	-1.873	-1.7563	0.3829	-1.5146	-1.3733	-1.7418	-1.3147	-0.5799	-1.4699	-1.5649	-1.7037	-1.6666	-1.6082	-1.8573	-1.7859	-0.8135	-1.5105	-0.6712	-1.1877	-1.3511	-1.4659	-0.527	-2.3585	-2.114	-2.7274	-2.6529	-1.9159	-1.3255	-0.9574	-1.737	-1.2413	-2.2447	-1.2447	-1.7084	-1.7515	-1.4228	-1.685	-0.1894	-2.5479	-1.2481
BTBD3	-1.1811	-1.3733	-1.2688	-1.1047	0.4308	-1.9214	-1.191	-0.2793	-0.9686	-0.6082	-1.3959	1.1814	-0.8339	-1.7959	-1.2723	0.2845	-0.5023	-0.5208	-0.4461	-0.415	-0.5437	-1.1234	-0.221	-1.0116	-1.2042	-1.2758	-0.5606	-1.1361	-0.2969	-0.0145	-0.0101	-1.3511	-1.6804	-2.0954	-1.6439	-0.685	-0.6215	-0.1001	-0.5312	-2.114	-1.699	-0.881	-0.8599	-1.0619	-0.4325	-1.0203	0.6924	-0.2951	-0.9351
C20orf72	-1.0203	-1.9379	-1.9885	-1.3659	-1.0058	-0.7108	-1.462	-1.2619	-0.8135	-2.1844	-1.5353	-0.0116	-1.5606	-1.3004	-1.6484	-1.114	-1.3622	-0.55	-1.3076	-1.4422	-2.2243	-1.6758	-1.9658	-2.3076	-1.8573	-0.9743	-0.8443	-1.9105	-1.1361	-1.5437	-1.2311	-1.889	-1.8468	-2.2934	-1.9434	-1.8943	-1.6215	-1.4112	-1.2447	-1.1681	-1.8943	-0.7539	-0.9942	-2.071	-1.7179	-1.6349	-0.3752	-1.2619	-1.2345
NAT5	-0.1697	-0.6349	-0.8757	-0.949	-0.2126	-0.7934	-0.7226	-0.7108	-0.1408	-0.3273	-0.7322	0.8544	-0.7179	-0.9296	-0.6126	-0.5543	0.115	-0.6082	-0.5778	-0.5735	-0.7959	-0.5799	-1.7563	-0.2723	-0.5628	-0.2863	-0.3292	-0.6416	-0.3771	-0.3147	-0.144	-0.7563	-0.5416	-0.9686	-0.881	-0.5208	-0.7037	-1.0559	-0.2226	-0.016	-1.3548	-0.4501	-0.4016	-0.5458	-0.7226	-0.9105	0.5251	-0.4699	-0.3808
TSPYL3	0.5965	1.2892	0.774	1.6929	0.3907	0.606	1.0079	1.4584	0.5221	0.4114	1.0398	1.1979	1.1654	1.4033	0.9819	2.043	0.433	0.2327	0.9819	1.0086	0.9942	0.5907	2.4712	1.4631	0.338	0.451	0.4447	0.6257	0.4967	0.8221	0.2461	0.8074	0.8351	1.5651	1.3724	0.8774	1.0136	1.6471	0.751	0.9553	0.4297	0.5529	0.545	1.2166	1.1985	0.6844	0.1928	0.9546	0.9508
CEP250	-0.0189	-0.2328	0.0552	0.434	-0.0786	-0.3129	-0.1877	-0.8084	0.0158	-0.2688	-0.6371	-0.2396	0.1776	-0.0043	-0.5585	-0.3004	-0.0679	0.0607	-0.4442	-0.482	-0.5735	-0.3129	-0.0203	-0.5479	-0.0262	-1.2243	-0.4016	-1.5105	0.7119	-0.4055	-0.4699	-0.9546	-0.5585	-1.255	-0.706	-0.5458	0.0482	-0.4941	-0.889	-0.2277	-0.8599	0.0186	-0.9828	-0.3659	-1	0.9855	-1.2828	-0.2758	-0.9051
NFS1	-1.1681	-1.071	-0.0939	-0.6967	-0.8599	-2.1078	-1.5951	-1.6439	-1.0831	-1.9159	-1.5312	-1.5907	-0.7466	-1.3997	-1.852	-1.2447	-1.8211	-0.8034	-0.6126	-1.3292	-0.9799	-1.0619	-1.4501	-1.2619	-1.0619	-1.699	-1.2447	-1.662	-0.8211	-1.2447	-0.685	-1.5864	-1.1943	-1.8625	-1.3511	-1.0559	-0.949	-1.0029	-1.5606	-1.3771	-2.0291	-1.0649	-1.9828	-0.9024	-1.3437	-0.4016	-0.5208	-1.3548	-1.4422
PRSS7	NA	NA	NA	0.3584	NA	-0.1926	NA	NA	NA	NA	NA	NA	NA	NA	NA	NA	NA	NA	NA	NA	NA	NA	NA	NA	NA	NA	NA	NA	NA	NA	NA	NA	-0.1976	NA	NA	NA	NA	NA	NA	NA	NA	NA	NA	NA	NA	NA	NA	NA	NA
CCT8	-1.5395	-1.4112	-1.2413	-1.415	-0.9105	-1.5907	-1.5522	-1.6126	-0.8034	-1.4901	-1.6666	-1.4422	-1.3884	-1.889	-1.816	-2.3585	-0.4739	-0.9658	-1.4901	-1.3328	-1.7563	-1.5864	-1.1844	-1.6712	-0.6016	-1.737	-1.1047	-1.5023	-1.462	-1.1266	0.099	-1.4659	-1.3147	-0.9462	-1.662	-1.2934	-1.6804	-1.5395	-1.4461	-1.5479	-1.3004	-1.3111	-1.771	-1.7515	-1.9546	-1.3733	-1.0985	-1.3659	-1.3659
SYNJ1	-0.4699	-0.415	-0.3622	-0.5564	-0.0306	0.2327	-0.9105	-0.4739	-0.2328	-0.6082	-0.4982	-0.3346	-0.6038	-0.0029	0.0635	0.3752	-0.1282	0.0342	-0.3292	0.3907	-0.1408	-0.3419	0.5811	0.3494	0.2449	-0.3292	-0.7155	-1.4422	-0.6484	-0.5146	0.6369	0.4071	0.4049	-0.7298	-0.0454	-0.4422	-0.4325	-0.3696	-0.4266	-0.2706	-0.274	0.4998	-0.2515	-0.3273	-0.9105	-0.331	0.5558	0.1763	-0.4719
MRPS6	-0.1047	0.9913	0.9642	0.6239	0.583	0.2998	2.06	-0.0499	0.3138	0.1467	-0.114	-0.1062	1.1104	-0.1568	-0.1392	-0.5842	1.1821	-0.1297	-0.0755	0.9426	0.1401	0.2798	0.7999	0.1953	1.2678	0.2869	-0.1763	-0.6193	0.2302	-0.4779	1.0014	0.9561	0.4792	1.0538	0.541	0.4212	-0.1203	-0.071	0.4212	-0.0923	0.4404	0.5069	0.1506	0.7664	-0.0786	0.127	1.5705	1.4244	0.5291
MFAP2	1.8294	0.0635	2.004	0.585	-1.0589	2.2409	-0.074	-0.3383	1.472	0.4016	0.472	1.1117	0.4823	0.7181	0.6211	1.0718	1.7634	-0.1681	0.8278	1.3994	-1.0145	1.5361	1.4222	0.1776	1.0243	1.201	-0.9942	-0.7859	0.8139	1.1263	0.6406	-1.5864	-0.243	-2.3659	-0.0454	0.5351	2.0783	-0.48	-0.7834	-0.486	-0.8135	-0.125	0.4415	0.8844	0.8464	-0.5437	-0.3959	0.6654	0.8711
CTSE	6.9507	6.1613	4.5934	3.8176	5.1342	1.082	6.4194	8.4765	4.3067	6.8667	6.297	3.0559	5.9486	5.7533	6.306	6.6977	3.8309	3.541	2.4316	5.5683	6.6084	6.2085	1.378	6.9955	5.1715	7.585	6.0297	7.6373	4.5747	6.9413	4.2063	3.9336	6.6935	7.2826	5.5892	6.6921	3.8934	4.4012	7.246	4.4283	7.3846	5.4689	6.503	5.5552	6.0538	5.6493	6.0054	6.8392	6.2228
B3GALT5	NA	NA	NA	NA	NA	NA	NA	4.5777	NA	NA	NA	-1.3437	NA	NA	NA	3.0747	NA	NA	-1.1078	NA	NA	-0.0664	NA	NA	NA	NA	NA	NA	NA	5.3716	1.1801	-0.8997	0.0086	NA	NA	-0.8863	NA	NA	NA	0.8016	NA	NA	NA	NA	NA	NA	NA	NA	NA
PWP2H	-1.114	-1.3147	-0.9241	-1.2481	-0.7909	-0.6827	-1.1172	-1.152	-0.9971	-1.2758	-1.3511	-0.9379	-0.963	-1.2311	-1.0321	-1.3846	-0.0664	-1.1456	-0.7563	-0.8391	-0.7298	-0.7686	-0.6215	-0.9379	-0.2226	-0.9574	-1.8625	-1.3733	-0.8546	-0.6827	-0.816	-1.8009	-1.1779	-0.6126	-1.1779	-0.6461	-0.5064	-0.606	-0.8009	-0.4055	-1.3183	-1.0619	-1.4112	-0.6506	-0.706	-0.7984	-0.8943	-0.6643	-1.0679
SUMO3	0.1928	-0.281	0.7066	-0.1959	0.6772	0.3629	-0.4739	-0.7131	0.3505	0.0426	-0.4501	-0.2951	-0.706	-0.5995	-0.144	-1.3959	0.7941	1.1738	-0.2396	0.4563	-0.1633	0.1699	-0.2176	-0.4189	0.7999	0.148	0.8703	-0.1345	0.406	-0.0725	1.1616	-0.1456	-0.3346	-0.5166	-0.2126	-0.097	-0.6484	-0.2159	-0.1795	-0.3827	0.0201	-0.0203	-0.2863	0.0115	-0.4016	-0.4208	0.2351	0.2594	0.0129
TSGA2	1.082	3.2018	1.8711	3.479	4.1391	-1.3733	4.1177	3.5211	3.3064	5.0347	0.5479	0.9568	3.3547	0.5059	2.2013	4.2824	4.4416	2.0946	4.1643	3.3262	1.7442	1.1583	2.3083	4.6758	4.8207	1.85	1.0108	3.7495	3.9098	3.0217	3.5298	4.5515	3.8679	3.2508	5.3158	2.2925	1.5008	4.3951	3.9059	1.8774	1.2382	4.4607	2.9061	4.5862	2.2277	2.3989	1.9332	5.3851	2.9256
BCL2L13	-0.4325	-0.6943	-0.7515	-0.5043	-0.4228	-0.281	-0.8783	-0.3328	-0.3237	-0.9546	-0.456	-1.0116	-0.2602	-0.8916	-0.2413	-0.1125	-0.482	-1.0801	-0.038	-0.2159	-0.4422	-0.7466	-1.221	-0.5187	-0.5187	-0.7013	-0.8757	-0.5778	-0.5002	-0.5606	0.0101	-0.7834	-0.4266	-0.1763	-0.5105	-0.4131	-0.1313	-0.8546	-0.5374	0.4803	-1.1172	-0.2653	-0.6326	-0.1536	-0.0559	-0.3622	-1.1877	-0.8186	-0.7394
DGCR14	-0.2345	-0.6943	-0.6643	-0.6171	-1.1456	-0.2226	-0.7418	-0.7466	-0.1568	-0.486	-0.4521	-0.1633	-0.2567	-0.3585	-0.2076	0.5321	-0.3147	-0.5125	-0.4442	-0.5023	-0.1746	-0.2969	0.4865	-0.5886	-0.4481	-0.811	-0.9462	-0.8997	-0.2226	-0.5374	-0.3201	-0.9546	-0.5864	-0.1844	-0.6371	0.037	0.3185	-0.8211	-0.6104	-0.0218	-1.0649	-0.692	-0.8494	-0.1488	0.127	-0.2362	-1.0801	-0.8365	-0.5437
TXNRD2	-1.3771	-1.5649	-0.9105	-2.4501	-1.0291	-1.3696	-2.4344	-1.7612	-0.8211	-1.4344	-1.304	-1.8417	-2.1714	-2.4266	-1.8262	-2.0058	-1.6038	-1.2109	-1.8836	-2.9885	-1.2828	-1.5606	-1.3328	-1.2481	-1.5821	-2.5395	-1.852	-0.8494	-2.2176	-1.1488	-1.0559	-1.0862	-0.458	-1.4035	-2.152	-0.6943	-1.4461	-4.1304	-1.1779	-0.9214	-1.4659	-2.152	-1.152	-1.255	-0.7859	-0.3076	-2.3076	-2.6529	-2.2109
PIK4CA	-0.415	-0.2793	-0.7274	-0.6897	-0.7934	-0.2026	-0.9914	-0.2951	0.2425	-0.6827	0.1991	-0.3219	-0.3733	-0.6371	-0.4639	-0.3771	-0.0831	-0.3997	-0.5249	-0.9187	-0.125	-0.3328	-0.0395	-0.0439	-0.1392	-2.1016	-1.8678	-1.0499	-0.1062	-0.0559	-1.5479	-0.8034	0.1776	-0.0247	-0.5312	-0.0634	0.0621	-1.454	-0.5821	-0.5756	-1.5907	-1.1584	-1.1016	0.3414	0.7198	0.0718	-2.5479	-1.3474	-1.2109
RAB36	-0.0923	0.419	-0.4461	0.2265	1.537	-0.6484	0.5079	0.2869	0.6098	0.8906	0.3663	0.1941	0.0243	-0.9078	0.1686	1.7368	0.8016	-0.7984	0.751	0.4468	0.45	-1.0679	1.6055	1.4772	0.8229	-1.1746	-2.1779	1.6785	0.4114	-0.1877	0.419	0.5221	0.7655	1.5509	1.1629	1.5008	-0.0116	1.4746	0.8718	-0.484	-0.3997	0.6107	0.0314	1.8683	1.1263	-0.8625	-1.1109	1.7617	-0.2092
CRYBA4	0.1648	0.2461	0.1916	NA	0.5578	NA	1.2066	0.406	0.3231	NA	NA	0.544	0.251	1.125	0.6276	-0.4461	0.0963	0.7816	-0.7637	0.1322	-1.7418	0.5059	0.8057	0.8016	0.9709	0.2881	NA	NA	NA	0.2216	0.0949	NA	-0.0014	0.7225	NA	-0.6304	0.9252	-0.0514	NA	-0.8997	0.5898	0.406	-0.6082	0.1686	0.7799	NA	0.4179	-0.4679	0.6107
GAS2L1	-1.3921	-1.527	-1.2345	-2.1456	-1.662	-0.2758	-2.3004	-1.2243	-1.7418	-1.5479	-1.7909	-1.6304	-1.5479	-1.3147	-0.9799	-0.7834	-1.5692	-1.7037	-1.771	-2.5064	-1.0116	-0.7442	-1.3511	-1.486	-2.2934	-0.6897	-2.114	-1.3733	-2.5907	-1.811	-0.6148	-1.6529	-2.2311	-1.7084	-1.4461	-1.9269	-1.2723	-1.3733	-1.2688	-0.6827	-1.4344	-1.1779	-1.0203	-0.7735	-1.2653	-1.191	-1.6394	-0.8059	-0.963
CTPS2	-0.6148	-0.3147	-0.6897	-0.9351	0.9575	-1.3585	-1.5105	-1.6529	-0.5778	-1.5312	-1.8943	0.1243	-1.1877	-2.0893	-2	-2.3219	-0.5023	-1.074	-1.7563	-2.8783	-1.8836	-0.7637	-1.3585	-1.0529	-0.3255	-1.9885	-1.2243	-1.6712	-1.3733	-0.7934	-0.9379	-0.6104	-1.1078	-1.8211	-1.5864	-0.7226	-1.4901	-2.4739	-1.2142	-0.889	-0.963	-0.949	-1.4982	-1.3328	-0.5564	-1.3328	-1.1779	-1.2723	-1.077
RNF185	-0.5395	-0.3346	-0.6371	-0.8599	-0.606	-0.8365	-1.1976	-0.5395	0.0663	-0.6781	-0.5043	-0.5821	-0.6484	-1.0893	-0.5995	-0.8034	-0.2059	-0.527	-1.0029	-0.9828	-0.1266	-0.737	-0.415	0.0144	-0.5395	-1.2109	-0.9214	-0.5713	-0.5043	-0.0189	-1.2311	-0.4364	0.0676	-0.1779	-0.8443	-0.1617	-0.4759	-1.6574	-0.0499	-0.0831	-1.3733	-1.2828	-1.1361	0.0172	-0.013	-0.3183	-1.6897	-1.3548	-1.1424
YWHAH	0.6906	0.0243	0.1583	0.1017	-0.1156	0.606	0.0594	1.0996	0.6906	0.3595	0.3288	-0.0277	0.2582	-0.3808	0.3092	0.3057	0.8828	0.3311	0.6069	0.2004	0.1003	0.24	-0.7539	-0.1959	0.9283	0.2786	1.1164	0.1388	-0.0544	1.1276	0.52	-0.7226	0.0922	-0.488	0.08	0.0663	0.3907	-0.7155	0.0286	0.2606	0.2228	0.4865	0.0594	-0.0484	0.1622	0.144	0.2461	0.962	0.8999
TOM1	0.2473	0.4297	0.0328	-0.6416	-0.3548	0.5271	-0.8339	-0.3474	1.0093	-0.1047	0.1648	-0.0604	-0.3921	1.0072	0.2845	-0.1828	0.7424	-0.5973	-0.2481	-0.1861	0.7268	0.7476	-1.1078	0.1506	0.0257	0.0172	-0.5756	0.7286	-1.0985	0.7242	-0.4679	-0.4699	0.6471	0.4168	-0.0425	0.3161	0.6835	-1.0649	-0.016	0.7715	-0.5564	-0.3201	1.0779	0.6617	0.3426	0.2666	-0.5332	-0.4921	0.0813
RBM9	-0.2863	-0.6735	-0.0939	-1.0649	-0.9434	-0.2533	-1.5312	-1.1943	0.1827	-0.8546	-0.7984	-1.1078	-0.484	-1.3364	-1.3292	-1.5064	0.6672	-1.685	-0.9885	-0.8546	0.3539	-0.2653	-1.2653	-1.041	0.4854	-1.1266	-1.7131	-0.949	-1	0.099	-0.7637	-1.2142	0.0172	-0.685	-1.7959	-0.9686	-0.454	-1.9269	-1.0893	-1.2379	-1.527	-0.5778	-0.6943	-0.8186	-0.9105	-0.1109	-1.3328	-1.9434	-0.9462
MFNG	1.3907	0.8797	0.0759	0.8262	0.1686	-0.5043	0.9336	0.9686	0.7004	1.1897	1.0517	-0.3789	0.6808	1.584	1.8172	2.1728	0.9268	1.2618	1.232	0.8552	0.0731	1.067	0.5597	1.237	1.2624	-0.2396	0.9092	0.0086	1.2992	1.6201	0.1966	-1.041	0.4179	-0.3492	1.4082	1.0475	0.9449	0.111	0.7832	0.9419	0.9366	-0.0985	0.7049	1.0165	1.5474	0.6996	2.069	0.5568	0.9664
MAFF	0.7493	0.8098	0.2104	0.0813	-0.2636	-0.3004	-0.4659	1.569	1.0759	0.5008	-0.0425	0.3471	0.0172	2.3199	-0.1894	0.8766	0.585	-0.1649	-0.7084	0.3818	-0.1329	0.844	-0.2533	0.346	-0.1345	-0.3183	-0.6758	-0.7809	-0.274	1.6717	0.1336	0.3403	-0.125	-0.1861	0.7128	0.4865	0.5898	-0.0014	0.9366	0.9153	-0.9971	-0.771	0.4563	0.3962	0.0384	-0.4921	0.406	-0.5929	-0.2464
GTPBP1	0.058	-0.0544	-0.3921	-0.2828	-0.5125	-0.304	-0.3622	0.3115	-0.0847	0.3426	0.2497	-0.1943	-0.1649	0.8631	-0.1861	0.8781	-0.1993	-0.1795	-0.4699	-0.0291	0.4988	-0.0189	-0.5543	0.3414	-0.1795	-0.811	-0.1943	-0.071	-0.1408	0.224	-0.4364	0.229	0.157	0.1738	0.2618	0.4114	-0.2379	-0.6126	0.044	0.364	-0.9379	-0.5125	-0.4961	0.1674	-0.0862	-0.3808	-0.3771	-0.5291	-0.417
SMCR7L	-0.6371	-0.9132	-0.8836	-1.074	-0.4639	-0.4521	-0.9686	-1.1266	-1.1779	-0.4461	-0.873	-1.0985	-0.7884	-0.8997	-0.6193	-0.7934	-1.3364	-0.8262	-0.4961	-0.4286	-0.191	-0.4325	-0.8916	-0.7539	-0.9743	-0.5437	-0.0816	-0.6712	-0.6574	-1.3328	0.33	-1.3585	-0.8237	-0.4982	-0.5043	-0.7612	-1.3255	-1.4422	-0.4131	-0.3364	-0.8059	-0.5628	-0.7784	-0.6237	-0.8237	-1.0679	-0.5973	-0.4189	-0.0634
ACO2	-0.8314	-0.8573	-1.0469	-1.071	-1.5951	-1.2243	-1.5395	-0.9771	-0.7909	-0.9518	-1.0862	-1.3183	-0.8237	-0.5395	-0.9434	-0.7346	-0.7884	-1.3004	-0.949	-0.8997	-0.7322	-0.5778	-1.5437	-0.9799	-0.9914	-1.8211	-1.415	-1.5735	-1.0954	-0.7934	-1.6897	-0.6484	-0.7784	-0.6827	-1.1649	-0.8009	-0.7202	-1.8059	-1.0831	-0.2602	-2.0291	-1.6394	-1.0174	-0.6529	-0.7834	-0.9406	-2.3364	-1.5395	-1.6171
TYW3	-1.2009	-1.3183	-0.881	-0.8916	-0.7202	-0.5395	-0.8084	-0.9132	-0.2533	-0.7637	-0.6394	-0.852	-0.9462	-0.8262	-0.5692	-1.2076	-1.3959	-0.685	-0.771	-0.4325	-0.55	-1.1297	-0.1536	-0.949	-0.897	0.1362	-0.5564	-1.0499	-0.6781	-1	-0.8546	-0.776	-0.8009	-0.6574	-0.3129	-0.7322	-0.8468	-1.1424	-0.5146	-0.6171	-0.6259	-0.8757	-0.2026	-0.9885	-0.8034	-0.46	-0.3959	0.2618	-0.6237
PNRC2	0.2129	0.4668	0.4478	0.5059	1.115	0.5714	1.058	0.6554	1.3329	1.196	0.516	0.3763	0.1814	0.1635	0.4478	-0.3364	1.3057	0.8294	0.2228	0.2104	1.0545	0.4071	-0.2863	1.1991	1.0813	0.739	1.1473	0.8074	0.8992	1.109	0.3033	1.0335	0.8961	0.962	1.1454	0.9321	0.1336	0.4573	0.7807	0.3561	1.1909	0.6489	1.3724	1.0915	1.0122	0.7908	0.4244	0.8496	0.7329
FAAH	-0.6484	1.7268	0.3403	0.4573	0.8229	1.2594	0.4478	1.4163	1.5993	0.2166	0.9753	1.7908	1.1329	0.3185	-0.7179	0.8041	0.8938	1.1865	0.1375	-0.1714	2.4016	0.8797	0.0552	1.0642	0.8472	-0.7155	-1	0.8074	-0.1187	1.4983	-1.2243	2.108	1.1037	1.6262	-0.0725	2.4764	0.6889	-0.7859	0.3918	-0.0589	-0.5886	0.4699	0.5714	1.1164	2.0043	0.9782	0.1686	-0.4093	-1.4383
DUSP23	0.4233	1.7933	2.1545	0.648	0.4168	3.6241	0.659	0.6443	1.4746	0.8319	0.5489	2.4362	1.4093	0.384	0.9107	1.0779	1.7212	1.6388	0.5211	1.1223	1.9077	1.6121	-1.1456	1.412	0.6471	0.0594	0.0201	2.3615	0.7312	0.2302	0.6727	1.908	0.051	1.4152	0.5099	1.0956	0.9069	1.5008	0.2154	-0.0923	0.7891	1.0996	0.9426	0.7999	1.1017	0.739	2.3317	1.9931	1.5321
PIGM	-0.6574	0.3618	1.2443	-0.097	0.745	0.2594	-0.2688	0.0936	0.9115	0.0594	0.1712	0.4478	-0.692	-0.6827	-0.8237	-0.7037	0.3254	0.3829	-0.417	-0.3273	0.0356	0.0566	0.473	1.08	0.3196	-0.3419	-0.041	1.1731	-0.6873	0.3068	0.148	0.4875	0.3962	0.058	-0.3827	0.058	-0.0649	0.5782	-0.3622	-1.221	0.4158	-0.3827	0.0552	-0.1456	0.6285	0.1097	1.0029	-0.0847	-0.5208
CFHR3	3.4182	5.2172	4.1473	4.2188	1.7386	3.852	3.6147	3.858	4.6508	3.7613	4.4854	3.5583	2.5041	2.4444	3.1119	1.6498	4.3277	3.9326	3.5472	5.3923	4.969	4.1227	-1.7959	2.473	4.1235	3.6949	3.2299	3.7939	3.8934	3.6064	3.064	0.3718	3.4841	2.0573	3.7247	2.5428	3.4436	4.8445	2.6443	3.1207	3.8777	3.8309	4.2196	3.6576	3.0755	3.2325	2.8458	4.4114	4.3764
LOC51336	NA	0.8286	NA	1.7163	NA	NA	NA	NA	0.7638	NA	NA	NA	NA	NA	NA	NA	0.0215	0.2029	NA	-0.6804	NA	NA	NA	NA	1.3265	NA	NA	NA	NA	NA	-1.4189	NA	NA	0.0895	0.1454	0.33	NA	NA	NA	NA	NA	NA	NA	NA	0.4093	NA	NA	NA	NA
KTI12	-0.8417	-0.6416	-0.1001	-0.5543	0.1243	-0.1746	-0.5564	-0.9406	-0.6827	-0.8059	-0.9324	-0.1828	-0.6439	-0.8997	-0.6552	-0.6416	-0.5842	-0.55	-1.2447	-0.7013	0.1454	-0.6259	-0.3884	-0.8704	-0.7563	-0.1552	-0.5166	-0.2059	-0.6827	-1.5105	-0.0029	-0.1345	-0.48	0.2642	-0.5125	1.2209	-1.0893	-1.2758	-0.5628	-0.1959	-0.6574	-0.4481	-0.0425	-0.606	0.394	-0.776	-0.1172	-0.2775	-1
TMEM59	1.1322	1.6821	1.2588	0.8805	1.715	0.7485	1.518	2.0032	2.0243	1.6475	1.3757	0.6201	1.2969	1.1947	1.0356	0.119	1.3016	1.2833	0.6572	1.281	3.05	1.5772	0.2449	1.1375	1.7424	1.2253	1.3584	1.2804	1.334	2.0022	0.9561	2.4057	1.4573	0.827	1.3225	3.6017	0.6645	0.3115	1.3852	0.5763	1.2815	1.4125	2.0973	1.8428	1.7321	0.8774	1.3885	1.3242	1.105
S100A7	0.8139	-1.8059	-2.5479	-1.6126	-1.9379	2.1104	-1.6038	-1.5395	-0.1219	-2.7466	-1.5395	6.3909	-2.071	-1.7226	-1.0985	-0.3419	-1.3585	0.5878	-1.3255	-2.5146	-2	-1.8573	-0.8211	-3.1844	-2.5479	-1.9602	-2.1016	-2.8262	-1.5228	-1.852	3.366	-2.2723	-2.0469	-2.4739	-1.889	-2.6712	-0.7013	-0.6439	-1.8211	-0.873	3.6392	-0.9828	-1.7179	-1.3997	-2.6712	-1.8678	-3.1976	-2.9324	-0.1078
PTGER3	1.412	NA	4.204	-0.0262	NA	NA	NA	NA	-0.4501	0.2774	0.4792	NA	1.4016	1.4725	0.7757	1.1609	1.2969	NA	2.1395	NA	-0.9914	2.3225	3.3674	NA	0.544	1.8957	0.7974	NA	NA	NA	0.184	NA	-0.0072	NA	NA	0	1.679	NA	NA	NA	0.6378	NA	0.3852	NA	NA	NA	2.6469	NA	NA
RC3H1	1.3196	1.1972	1.6145	2.0018	1.7035	2.5158	1.8659	1.6178	1.0022	0.1789	1.4792	1.8695	1.3951	1.952	1.7137	2.0426	1.294	2.0243	1.5826	1.8616	0.8608	1.257	1.346	0.6098	0.9804	1.1903	2.0208	2.0728	1.442	1.3374	1.6803	0.3674	1.0093	1.7238	1.9601	1.7693	1.1057	3.2124	1.9855	0.8969	1.9764	1.7163	1.6658	0.844	2.3755	0.8254	1.8774	1.5597	1.3057
OCLM	NA	0.2654	NA	NA	NA	NA	NA	0.5588	NA	NA	NA	NA	NA	0.6663	0.0496	1.7307	NA	NA	NA	0.6173	NA	1.1674	0.144	0.4926	NA	NA	NA	NA	-0.5023	NA	NA	0.2203	0.0072	NA	NA	0.9123	0.0029	NA	0.5519	NA	0.0718	NA	NA	NA	NA	NA	0.959	NA	NA
LCK	4.6094	3.4141	2.2774	3.8836	2.9144	2.5069	3.5546	3.6668	3.3052	4.2403	4.04	3.1355	3.2991	4.0678	3.3854	2.994	3.0813	4.9126	1.4673	2.9011	3.2259	3.706	2.4877	4.0798	4.3937	3.2737	4.843	2.0377	4.6685	3.8875	3.0397	1.3962	1.9535	2.5208	4.4019	3.8699	2.7047	2.9071	3.845	4.5699	4.6696	3.3519	3.3448	3.7506	3.6017	4.9439	0.962	1.9829	2.9581
ADC	0.346	0.7485	0.0257	-0.6689	-1.1016	-1.8468	-0.4961	-1.2934	0.538	-0.6758	0.6627	-0.9187	0.0745	-0.5332	-0.9324	-1.1203	0.2833	-1.0893	-0.6597	-1.3733	0.6276	1.3796	-1.0321	-0.4461	-0.3511	-0.0619	-1.699	-1.0893	-0.9856	-0.6873	-1.5312	0.6107	0.6772	-0.3401	-1.3511	-0.3292	0.0398	-0.5395	-1.5353	-1.482	-0.2758	-0.9434	-1.2142	1.5301	0.1467	1.0186	0.1674	-0.706	-1.4189
PSEN2	-0.0831	-0.0262	0.3573	0.3539	0.3323	0.5646	0.2041	1.0614	0.275	0.7049	-0.0454	-0.2142	0.2449	0.1622	0.4531	0.7216	0.3127	0.2892	0.3863	0.1953	-0.46	0.8327	-0.486	0.2437	0.5984	-0.2481	0.0635	-0.2533	0.3595	0.52	-0.2076	0.0314	-0.5416	-0.3997	-0.3419	0.2558	0.3516	0.9283	-0.6237	-0.1424	-0.173	-0.2898	-0.3165	0.5801	1.1003	0.1401	0.8914	-0.0247	0.1903
CNIH3	-0.685	0.2738	-0.7394	-1.221	-0.48	0.8464	-0.0619	0.0058	-1.3364	0.4319	0.058	-1.3659	-0.1219	-0.2969	1.0165	-0.2845	-0.8339	-0.0695	-0.1234	1.8258	1.3951	0.3138	1.6924	0.4125	-0.3585	-0.8863	1.2247	-0.3846	0.8695	-0.013	0.6772	2.0514	1.5748	1.2576	1.3437	0.2473	0.7681	0.5917	-1.3147	0.1493	-0.221	-0.8339	0.4865	0.2041	0.5241	-1.0203	0.0524	0.2054	-0.0923
YTHDF2	-0.0425	0.0963	0.0868	0.4584	0.2302	0.4244	0.3785	-0.2076	0.0356	0.1545	0.0854	0.4255	-0.0816	-0.1472	0.1137	-0.3585	-0.1617	0.1763	0.5361	0.2449	0.4394	0.3426	-0.3827	0.1941	-0.0321	0.4276	0.1427	0.257	0.3774	-0.4699	0.0827	0.5734	0.1003	0.0342	0.111	0.4957	-0.4325	0.2869	0.2666	-0.3808	0.6817	0.5617	1.1903	0.3785	0.1596	0.3874	0.3663	0.7163	0.224
RGS8	NA	NA	NA	NA	NA	NA	NA	NA	NA	NA	NA	NA	NA	NA	NA	NA	NA	NA	NA	NA	NA	NA	NA	NA	NA	NA	NA	NA	NA	NA	NA	NA	-0.0029	NA	NA	NA	NA	NA	NA	NA	NA	NA	NA	NA	NA	NA	NA	NA	NA
C1orf102	-0.0664	0.8448	0.3138	0.4678	1.7062	0.1349	1.2594	0.394	0.9694	1.1322	0.0086	0.2004	0.4005	-0.0395	0.2327	-0.3004	1.1454	0.4168	1.177	0.4244	1.6074	-0.1861	0.251	1.0208	1.0461	0.3437	-0.3058	0.6173	0.5907	0.7155	-0.873	1.8801	0.827	1.0335	1.1947	0.2216	0.6951	1.9107	0.5539	-0.4659	-0.3273	1.201	0.8311	1.6374	0.45	0.6906	0.3741	1.0272	0.3763
C1orf149	-0.3846	0.0949	0.33	0.1493	0.4136	-0.5842	0.5539	-0.1001	0.301	0.2079	0.0356	-0.0072	-0.458	-0.4461	-0.6193	-1.2584	0.1003	0.0272	-0.4189	0.3185	1.2845	-0.4481	0.8278	0.4657	0.189	-0.3292	-0.3492	-0.013	0.0621	-0.4659	-0.4093	0.4688	0.4071	-0.2775	0.1941	0.7111	-0.1031	0.0566	0.0043	-0.5649	-0.2481	-0.0469	0.7119	1.0129	0.4854	-0.3183	0.512	-0.038	-0.4719
NBPF3	-0.0116	-0.0058	0.6699	0.9986	0.5321	-0.0072	0.4255	0.1686	0.33	0.1827	0.0482	0.2104	0.3265	0.4751	0.2339	-0.144	0.5341	-0.1779	0.7277	0.6781	-0.5105	0.0731	-0.173	0.8164	0.4998	-0.1329	0.2821	-0.2042	0.6257	0.0356	-0.2345	-0.4189	-0.0043	0.5529	0.2998	0.8416	0.8718	0.7765	0.1979	0.8552	0.0243	0.3471	0.1776	0.9176	0.9723	-0.3094	-0.1001	0.3196	-0.0469
PLA2G5	2.7617	2.3231	5.314	3.6041	2.251	2.2975	2.515	3.3799	2.4589	3.5814	2.6922	2.5869	2.3057	2.1843	2.3813	3.0635	2.8327	1.1197	1.6327	3.3576	1.3863	2.5423	1.8078	2.5338	3.1939	2.7532	2.4988	2.0482	2.5862	2.5743	3.2208	0.9971	3.3646	2.5442	3.5236	3.1145	3.3964	1.6893	2.4008	2.1814	1.0264	0.7493	3.2132	2.662	3.2901	1.451	2.6839	2.517	1.7995
UBIAD1	-0.8651	-0.9462	-0.8288	-0.9159	-0.8651	-0.8573	-0.9743	-1.1714	-1	-1.0559	-1.1047	-0.8186	-1.3076	-0.8468	-1.1976	-0.7394	-1.3004	-0.7563	-1.3997	-1.1617	-0.816	-0.7984	-1.0321	-1.041	-0.963	-1.1552	-1.3622	-1.1456	-0.963	-1.2619	-1.0619	-0.5084	-1.1172	-0.7686	-1.0649	-0.8757	-1.5649	-0.7226	-0.4325	-1.1266	-1.2863	-1.1456	-1.1943	-0.5228	-0.5395	-0.8443	-0.6712	-1.0145	-0.9714
CYP2J2	-0.0484	-1.077	0.8528	0.4626	0.5597	0.3323	-0.1031	1.9731	0.7933	-0.281	-0.331	1.4552	1.2768	0.1916	-0.4131	1.0545	0.739	1.9449	0.2738	-0.1016	1.7004	-1.482	0.4276	1.4276	1.0144	0.6462	-1.4189	0.6608	1.1998	0.044	1.2612	1.5145	-0.4739	0.7433	0.543	1.9811	1.3545	0.4926	1.0628	1.2827	-0.4035	0.7621	-0.255	0.1776	1.1991	-0.0877	0.9516	1.1434	0.7022
GBP4	4.3205	2.5346	1.6929	4.7054	3.8934	3.5729	4.1252	4.8738	2.5806	2.114	4.1367	3.7082	4.3277	4.757	4.696	5.384	2.7602	5.6915	3.5008	3.5311	2.4795	3.516	3.2339	2.1339	2.2913	4.3681	5.2935	2.5497	5.0892	3.7334	4.0321	2.1398	2.9773	2.5595	4.0548	2.0061	2.873	4.6843	3.9736	5.406	3.4983	4.2133	3.6171	2.2351	3.3519	4.2979	1.5666	3.4383	3.849
MDM4	0.3774	0.051	1.4436	0.8343	1.0328	1.5003	0.8082	1.4457	0.5039	0.6563	0.5821	1.3306	0.4957	1.7294	0.6313	0.5984	-0.3419	1.9328	2.7698	1.6012	0.0676	1.0969	2.5403	0.7146	0.6257	0.6164	1.8821	0.394	1.4787	0.3161	1.177	0.7638	-0.0336	0.679	1.1408	1.2023	1.058	2.7968	2.6551	0.6192	0.8836	0.6135	0.3606	0.3092	1.3039	-0.1552	2.1982	1.3109	0.8131
SELL	3.0421	NA	NA	2.6915	0.7242	0.3219	1.7916	2.5509	2.2669	2.9657	1.8887	2.8647	2.4388	4.1538	1.4287	0.1814	1.8404	3.2755	1.2558	0.6145	0.4521	2.4273	NA	0.3962	3.9136	NA	4.3547	NA	3.4893	2.9919	2.2815	NA	-0.0336	NA	3.9307	2.5168	0.0286	2.456	2.2916	3.7115	4.1699	2.7666	0.8758	1.5714	1.1243	2.5663	NA	NA	2.7383
GPR161	-0.16	-0.3346	-0.0395	-0.7784	-0.897	0.2762	-0.1714	-0.0574	-0.5564	-0.6827	-0.3456	0.3414	-0.4189	0.1648	-0.0174	0.5008	0.058	-1.0985	-0.5929	-0.9771	-0.9658	0.0426	-0.2109	-0.5564	-1.5187	-0.9856	-1.458	-0.9105	-0.7442	-0.9051	-1.0559	-1.1844	-1.035	-0.8186	-0.3752	-1.1203	-0.2042	-0.3978	-0.4739	-0.5416	-0.3165	-0.55	-0.4228	-0.4016	-0.4921	-0.5228	-1.3292	-0.7884	-0.6282
ADAM28	3.3533	4.0045	1.461	2.8258	0.9855	2.7557	3.3306	4.0453	3.5898	2.989	1.5917	2.7729	2.3978	4.985	2.5263	3.4828	2.5455	2.513	0.2522	2.9527	3.2144	3.1424	0.8375	1.4308	3.2766	2.2528	4.2227	1.742	3.706	4.8207	3.466	3.9837	-0.0029	0.5018	3.5398	1.3595	0.9479	2.9982	2.782	3.3505	3.146	2.1567	1.2594	1.7803	1.6093	1.1519	1.6731	2.344	2.3389
NAV1	1.2116	1.0711	0.8528	2.0215	0.8367	1.766	1.6415	1.3907	0.9664	0.1043	0.6041	1.3045	1.6392	1.3907	1.4217	2.2699	0.965	1.1622	1.9627	2.5148	1.067	1.3885	1.3896	0.419	1.0115	1.8659	1.8528	1.3086	0.9366	0.827	1.8945	1.6168	-0.0072	0.2351	1.1401	-0.0014	1.1998	1.2185	0.5878	1.2534	1.123	1.6341	1.5646	0.4699	1.9742	0.1204	2.5388	3.3604	2.16
MAN1A2	0.4179	0.2963	0.4977	0.4823	0.5859	1.2004	0.8311	0.6369	-0.1297	-1.2653	0.6987	0.8781	-0.1203	0.2066	0.1725	-1.5951	0.2928	1.5936	0.4875	0.7698	0.5548	0.5878	1.3651	-0.4982	0.7765	0.0356	1.8359	1.2016	1.0956	0.1084	1.5105	0.8663	0.3874	0.6663	-0.3997	0.0029	0.0314	-0.144	0.7883	-0.8059	1.0065	0.0731	0.2376	-0.3511	0.726	-0.4501	0.9061	0.157	0.175
HMGCS2	-2.0589	-2.2863	-1.9658	-1.7131	-0.9658	-2.1456	-1.8211	2.4712	-2.2793	-1.3622	-1.3771	-2.1844	-2.737	-2.3733	-2.1456	-1.6215	-1.662	-1.3328	-2.5479	-1.811	-1	-2.4189	-0.6597	-1.3959	-2.6439	-1.3808	-2.776	-1.9828	-2.0174	2.3981	-0.7274	0.1243	0.2702	-1.6484	-2.6804	2.4136	-2.5995	-2.5064	-1.7226	-1.7959	-1.6666	-1	-2.1329	-1.9771	-1.5821	-1.2934	-1.5146	-2.4112	-1.5735
MAN1C1	1.3785	2.0858	0.4823	1.972	0.9153	-0.6416	1.4217	0.8592	2.129	1.8655	1.1782	1.0236	1.3403	1.487	1.8139	0.3369	1.3357	1.4367	0.2203	1.546	0.2951	1.4016	-0.3978	2.2101	1.0704	-0.221	1.3443	0.2041	1.8383	0.3505	0.6817	3.7602	1.884	1.8584	2.0007	2.4797	1.2296	0.8552	1.6772	1.1699	0.8488	0.5898	2.0969	1.518	1.8094	0.7373	0.2546	1.1237	2.009
ANXA9	-0.9828	-1.8678	-1.7859	-1.071	-0.527	-1.3401	-2.5146	-0.4442	-1.5606	-1.771	-1.2934	-2.191	-2.1329	-2.2653	-2.3364	1.2004	-0.7084	-1.4305	0.1545	-2.5821	-2.816	-2.9434	-0.4093	-2.0233	-1.4501	-4.195	-2.4982	0.0496	-0.7274	0.3874	-3.2109	-2.2311	-1.7084	0.4222	-1.9602	-1.9324	-0.482	-1.8468	-1.0923	0.5607	-0.0365	-0.6171	-1.304	-1.6804	-1.7418	-3.3525	-0.1746	-0.125	-2.2243
HEATR1	-1.9771	-1.9771	-0.5023	-1.8262	-1.3921	-0.4208	-1.7959	-1.5522	-0.7637	-1.6666	-1.8009	-1.1392	-1.7661	-1.5479	-1.8262	-0.8916	-1.5821	-1.071	-2.0649	-1.7037	-1.6529	-1.4112	-0.8599	-1.8211	-0.8443	-1.074	-0.9351	-1.8314	-1.2653	-1.486	-1.1746	-2.2723	-1.8783	-1.2793	-1.7909	-1.4228	-0.9771	-1.0923	-2.0893	-1.6574	-1.0499	-1.486	-1.6529	-1.6038	-1.1649	-0.9105	-0.1001	-1.1203	-1.2969
EBNA1BP2	-1.3292	-1.255	-0.963	-1.0233	-0.9602	-0.949	-0.9799	-1.5105	-1.3328	-1.3733	-1.6349	-1.1456	-0.6597	-1.5735	-1.5649	-1.1877	-1.3147	-0.9105	-1.2311	-1.0619	-0.5416	-1.3147	-0.8314	-1.2723	-1.1297	-0.8704	-0.9024	-1.1361	-0.7108	-2.071	0.1217	-0.5692	-1.2481	-1.3733	-1.3292	-0.606	-1.4901	-0.5886	-1.3292	-1.7563	-1.2447	-0.7346	-1.3255	-0.9024	-0.9602	-0.9942	-0.881	-0.6643	-1.2934
YY1AP1	-0.7418	-0.7784	0.4114	-0.6735	-0.2636	-0.0893	-0.7084	-0.5249	0.1454	-0.6215	-0.8704	-0.3201	-0.9462	-0.4921	-0.9856	-0.3733	-0.4699	0.434	-0.7984	-0.692	-0.7179	-0.3419	-0.7959	0.0286	-0.2723	-0.963	0.3561	-0.5907	0.0827	-0.4286	-1.0923	-0.6666	-1.0116	-0.8863	-0.9241	-0.1109	-0.462	0.1827	-0.8573	-0.1313	-0.4779	-0.8211	-1.1424	-0.7612	-0.364	-0.7884	-0.0454	-0.567	-0.9518
NES	0.8164	0.1583	0.4233	0.5311	-0.1844	0.4027	-0.0145	1.1388	0.5568	0.9738	0.545	0.0257	0.513	0.7883	0.8528	0.0412	0.726	-0.6148	-0.5353	0.4844	-0.7155	1.1237	1.5023	-0.1297	0.1557	-0.1746	0.3482	0.301	0.1928	1.4163	-0.2706	-1.152	-0.1047	-0.5756	0.5926	-0.0043	1.4206	-0.0604	-0.4639	-0.4719	0.0786	0.2762	0.3369	0.03	1.6225	0.5945	1.3004	0.099	0.6022
C1orf2	-1.5479	-1.7226	-0.8034	-1.1234	-1.3111	-1.1488	-1.7418	-1.2413	-1.0439	-1.5951	-1.7515	-0.9241	-1.7084	-1.458	-1.737	-0.7515	-1.8009	-0.9241	-1.3437	-1.873	-1.462	-1.7466	-0.852	-0.8678	-1.6171	-1.7859	-1.685	-1.3921	-1.4074	-1.3147	-1.8997	-1.6712	-1.9105	-1.6804	-1.699	-1.3659	-1.0203	-1.0559	-1.4035	-0.9714	-1.4228	-1.2277	-1.7037	-1.5907	-0.9105	-1.3004	-0.8009	-1.3959	-1.949
MAPBPIP	-0.0087	0.1296	0.5079	0.2041	0.7891	0.5231	-0.4961	0.4834	0.7689	0.4233	0.4372	0.584	0.2762	-0.0174	0.099	0.2253	0.8416	-0.2987	0.3346	-0.2396	0.2833	0.538	0.0718	1.1144	0.5907	0.2016	0.8624	0.5714	0.3741	0.7545	-0.6148	0.3494	0.3208	-0.2636	0.0043	0.3516	0.5489	0.538	0.2845	1.0222	0.1699	0.3185	-0.0786	0.5039	0.5945	0.6544	0.3918	0.4319	0.519
HSPB7	0.7207	3.3138	3.1765	2.3727	2.2357	NA	2.4722	2.6859	3.2972	4.2758	1.5632	0.8953	0.8852	2.2645	2.3699	1.3351	2.1912	NA	NA	1.6196	0.5221	1.4457	NA	1.1164	3.6893	1.9161	0.7723	1.85	1.4885	3.4236	NA	NA	0.7527	NA	2.7562	3.4449	3.5135	1.8363	0.6452	NA	NA	0.9046	3.366	2.731	3.796	NA	1.6717	1.7233	2.0496
AGMAT	-1.0203	-3.3793	-1.8211	0.513	-0.2226	-1.1943	-1.816	-0.7346	-3.2515	-2.4266	-2.8678	-1.6943	-0.6193	-1.3292	-1.5692	1.3196	-2.3959	-0.5353	-0.2723	-2.3659	-3.3899	-0.3437	-0.488	-3.7622	-0.8237	-0.7909	-0.5907	-2.0649	-0.3364	-1.8009	-1.8365	-3.4454	-4.1923	-0.4093	-1.9379	-2.9546	-3.1844	-2.2447	-1.4901	-0.0306	-1	-0.394	-2.8997	-2.8783	-2.4344	-0.1016	-1.2109	-1.0801	-0.221
R3HDM2	-0.4208	-0.1219	0.1427	0.1506	-0.1408	-0.4189	-0.0262	0.2327	-0.3237	0.3022	0.4563	0.0086	-0.2243	0.2546	0.2642	1.0875	-0.2863	0.3907	0.8335	1.5806	-0.4403	-0.4055	0.0454	0.5558	-0.3511	0.0868	0.472	0.1583	0.0115	0.0566	-0.5125	-0.2671	0.0676	0.103	0.547	0.5955	0.3907	0.4201	0.3323	0.584	0.1827	0.3741	0.175	0.2388	0.0186	-0.2009	0.4372	-0.0619	0.8327
OVGP1	-1.3959	-1.1877	0.1674	-0.7442	1.4547	0.175	-0.3111	0.9935	-0.6282	-0.2481	-1.071	-0.3237	-0.0574	0.5734	-0.699	-0.3492	-0.6304	-0.9942	0.3323	1.1037	-0.9051	-0.6259	1.8456	-0.0058	0.9716	0.2016	1.6563	-1.1424	-0.4481	0.3471	-0.2447	-1.9602	0.0172	1.7133	0.5859	1.3214	0.1738	-0.0574	-0.6016	-0.3808	-1.0291	-0.8599	-0.1266	-0.1125	0.6699	-0.9546	1.5455	0.058	-1.816
FCER1A	4.5242	6.04	5.0219	3.3082	5.9953	1.6327	7.0345	5.6159	4.7415	5.5656	6.2178	0.605	3.1053	3.86	6.3461	1.4552	5.0444	2.2639	5.1894	5.6147	5.1759	3.433	0.5743	6.2065	4.7115	4.5059	3.7835	5.9392	2.4217	5.1243	4.6398	5.0501	5.5024	3.847	5.8495	5.4702	6.3813	5.4419	5.9357	1.4356	6.1008	5.4803	4.8728	6.6261	5.6282	4.8089	3.6496	4.5741	5.4867
LRRC8C	0.5018	-0.3328	-0.685	0.4875	-0.0043	-1.0619	0.175	-0.8211	0.5714	1.3294	0.3573	1.0022	-0.3733	-0.0189	1.2455	-1.2413	0.8891	1.2363	0.8639	0.1137	-0.9686	0.886	-2.3292	0.8999	1.1897	0.2654	2.0742	-0.3129	1.0642	0.583	0.5656	-1.3585	0.4308	-1.2311	0.9336	-0.144	-0.5416	0.1177	0.4436	0.2004	1.2135	-0.4739	0.4255	-0.0619	0.779	0.3918	-0.0816	1.3618	0.959
HIPK1	1.4222	1.1972	1.6369	2.656	2.3868	1.5787	2.1483	1.9653	0.8213	1.1564	2.1528	1.5816	1.8945	1.674	1.988	1.2898	1.1859	1.4249	1.3612	2.2669	1.4998	1.2179	2.0514	0.8082	1.2618	1.196	1.6835	1.8258	2.1253	1.3482	1.1104	1.1808	1.3713	1.8176	2.2357	1.5724	1.4292	2.4273	1.6969	1.2185	1.5039	1.389	1.3369	1.2798	1.7403	1.4022	1.8957	2.2869	1.1661
VANGL1	-0.7859	-1.6082	0.0813	-0.4521	0.4287	0.3505	-1.114	-1.1681	-1.1714	-1.5735	-1.4305	-0.1203	-1.1746	-1.4228	-1.3959	-1.7226	-0.4941	-1.1584	-1.3921	-0.6781	-1.7179	-1.2898	-0.6282	-1.6038	-0.6082	0.1763	-0.2775	-1.0985	-0.2934	-1.0954	-0.606	-0.5929	-1.3364	-0.9269	-2.0469	-0.4035	-0.4779	-1.9159	-1.5995	-0.9296	-0.873	-0.5522	-1.771	-1.4383	-1.458	-0.0893	-0.6597	-0.2294	-1.2311
JARID1B	0.0072	0.2461	1.5115	0.7329	0.7883	0.5291	0.3863	0.3437	0.6563	-0.2092	-0.152	0.6304	0.4201	-0.0939	-0.5228	0.3161	0.622	0.308	1.9096	-0.1313	0.5617	0.8319	0.8424	0.0949	0.5568	-0.2126	0.2987	0.3907	0.4998	0.4563	-0.9971	0.4626	0.0827	0.3448	-0.8494	0.0607	0.9862	0.583	-0.1665	-0.5973	0.1243	-0.5735	-0.7226	0.2798	0.7102	-0.3004	0.45	-0.5995	-0.4639
FCRL3	0.0786	0.069	NA	NA	NA	NA	0.5519	NA	0.338	NA	NA	NA	NA	0.5607	NA	NA	NA	1.0861	NA	NA	NA	0.2928	NA	NA	0.7527	NA	0.8278	NA	1.3757	0.5772	NA	NA	NA	NA	NA	NA	NA	NA	NA	0.4605	0.2869	-1.2142	NA	NA	-0.4055	0.54	NA	NA	NA
FAM5C	1.2147	1.7424	2.7331	1.2922	0.9283	0.6041	1.9396	2.6969	1.6717	2.2741	2.4284	1.7698	0.0215	1.5984	0.6489	1.4526	2.1104	0.8148	1.2327	2.742	0.542	0.6871	1.211	1.2491	1.8699	3.2963	0.4158	0.763	0.4751	0.5792	0.9061	NA	0.0841	0.3426	2.5743	1.434	2.8311	0.5321	NA	NA	1.2172	1.1718	1.7933	1.5145	2.9224	0.7562	1.8584	1.1789	0.9716
UBAP2L	-1.7612	-1.7466	-1.1649	-1.0029	-1.9546	-1.3622	-2.0649	-1.6082	-1.1811	-1.9771	-1.8625	-1.2515	-2.1329	-1.8997	-1.9379	-1.486	-1.9602	-1.5228	-1.8997	-2.3959	-2.0058	-1.5312	-1.3004	-0.9379	-1.8211	-2.3147	-2.035	-1.7661	-1.2481	-1.685	-2.5395	-1.8625	-2.0291	-1.5353	-2.191	-1.0954	-1.5735	-1.6439	-1.7274	-1.3585	-2.0116	-2.1392	-2.6349	-1.6529	-1.6126	-1.6126	-2.1714	-1.8262	-2.4739
DTL	-2.4901	-4.3868	-1.7466	-0.4325	-1.5778	-0.4982	-2.776	-2.4189	-1.304	-3.968	-3.1584	-0.3419	-1.9214	-2.1203	-2.3959	-0.482	-3.0831	-1.1392	-2.4422	-2.3004	-2.7661	-3.7524	-0.013	-4.5362	-3.5362	-1.3183	-0.9406	-2.0174	-1.5735	-3.9368	-2.3292	-3.9931	-2.2723	-2.9434	-3.1844	-4.1431	-1.8365	-1.4383	-3.1456	-1.4779	-1.2515	-0.8546	-3.0469	-3.4612	-2.8678	-1.0058	-1.5778	-0.3752	-0.9406
TTC13	0.0058	0.103	0.6182	0.8624	1.1609	1.5018	0.0144	-0.0877	0.751	0.9583	0.0243	0.6699	-0.4442	0.4699	-0.3456	0.2786	0.4383	1.224	-0.4074	0.5974	-0.4035	0.7216	-0.114	0.0384	1.8053	0.3918	2.0993	0.069	1.3179	0.5529	0.3277	-0.0908	-0.2533	-0.1329	0.7433	1.4657	-0.1297	0.9627	-0.2916	-0.1001	0.3173	0.1991	0.1557	-0.2723	0.5311	-0.4941	1.9686	0.1164	0.1164
LRRC38	1.9222	-1.2243	-0.5585	NA	NA	0.3829	-1.152	NA	0.4521	0.474	NA	NA	-0.2193	0.6126	-0.0649	-1.2793	0.8351	1.4281	1.8456	-1.6082	NA	0.3539	NA	NA	0.4071	0.6889	3.0707	0.5753	NA	NA	-0.9434	-0.8546	NA	NA	NA	-1.2447	-0.8009	-0.4208	-0.9132	1.6494	-1	2.7115	-0.5713	0.7596	0.0043	NA	0.6192	1.8315	1.8164
AURKAIP1	-0.5929	-0.4305	-0.6873	0.539	-0.4422	0.0635	-0.2294	-0.6781	0.0129	-0.8262	-0.7539	-0.0574	-0.2042	-0.6193	-0.685	-0.1828	0.1296	-0.8262	-0.6104	-0.2076	-0.4779	-0.2636	-0.5125	-0.8573	0.1941	-0.771	-1.0862	-1.1552	0.1532	-0.4639	-0.6304	-0.1536	-0.7909	-0.7013	-0.8314	-0.3456	-0.4422	-0.2092	-0.4266	-0.0014	-0.8365	-0.2396	-0.4016	0.3414	-0.3548	-0.1456	-0.9241	-0.3771	-0.881
SPATA1	0.0841	-0.0058	1.4244	-0.2584	1.3265	0.9351	0.5984	0.0158	0.6763	1.3115	0.7866	0.3829	-0.0218	0.0745	0.8432	0.8197	-0.0831	0.4265	0.2786	1.2382	1.044	0.3022	1.3323	2.1878	1.0072	1.346	-0.1156	2.0353	-0.0247	0.384	-0.771	0.4626	1.7146	2.4319	-0.4442	3.0314	0.745	0.6817	1.1757	0.8106	0.7312	-0.1697	2.7788	-0.0862	0.8836	0.9738	0.3311	1.8131	0.7137
UFC1	-0.2723	0.1336	0.7181	0.0129	0.2833	0.4926	-0.2845	0.7198	1.0136	0.6003	-0.1795	0.2821	-0.4982	-0.3808	-0.458	-0.6689	0.9928	0.0314	-0.6349	-0.7274	0.2351	0.4265	-0.8314	1.419	0.8836	0.0635	-0.6967	0.7355	0.1686	0.8367	-0.3328	-0.1078	0.2041	-0.3677	0.1506	0.5627	-0.1392	-0.1001	0.0538	-0.3219	0.4926	0.127	0.263	0.7858	0.5529	0.5519	0.8229	0.1137	-0.0939
COL5A2	3.0844	0.1583	3.122	2.4033	0.4844	1.9237	0.9358	-0.0029	1.9913	1.0587	0.5548	2.4103	1.7403	2.2681	2.0628	2.1702	2.5658	0.8528	3.1873	2.9471	-0.3997	3.5497	-0.3846	0.1283	1.9501	4.0704	0.9767	0.1401	1.8608	1.1473	3.3757	-0.1408	0.9328	-1.5187	-0.0058	0.827	3.3505	-0.2533	-0.0247	1.8671	0.4751	1.5854	1.4803	1.4584	1.3746	-0.1552	2.3542	1.8274	3.5789
B4GALT3	-0.5628	-0.6349	0.5801	-0.3846	-0.5821	-0.4266	-0.8443	-0.2828	-0.1959	-0.3183	-1.0679	-0.3585	-1.2109	-0.4286	-1.2176	-0.7859	-0.4208	-0.2328	-1.041	-1.3364	-0.7959	-0.0514	-0.0908	0.384	-0.4035	-1.152	-0.2193	-0.9406	-0.3437	-0.1266	-0.7394	-0.5395	-1.1297	-1.035	-0.8916	-0.3255	-0.1376	-0.3715	-0.9269	-1.0058	-1.2042	-1.5479	-1.6804	-0.6104	-0.5084	-0.2619	-0.6126	-1.2758	-1.1361
FAM20B	-0.3978	-0.6689	0.1738	-1.0233	-1.0499	0.3103	-1.4941	0.0496	-0.1047	-1.1584	-0.7984	-0.2498	-0.9658	-0.7226	-0.9051	0.2916	-0.9771	0.434	-1.2176	-0.7539	-1.074	-0.5084	-0.662	-1.3548	-0.3603	-0.5907	-1.2688	-1.2828	-0.8678	-0.7735	0.1814	-1.0262	-1.4699	-1.3511	-0.7834	-1.3183	-0.7686	-0.0939	-1.4074	-1.6259	-0.8997	-0.8443	-1.1109	-1.1392	-0.7959	-0.2076	-1.3147	-0.0484	-0.9971
FGR	5.6124	5.2772	5.4067	5.7568	5.3975	4.742	5.804	5.839	4.7398	5.6305	5.5674	4.7597	5.8848	5.6279	6.6851	4.6582	4.6814	5.1667	5.4725	6.8367	5.0934	5.1835	4.9026	5.8537	5.3434	5.4199	5.4403	5.7819	5.2998	5.3334	5.2384	5.5771	5.4222	5.6264	5.7936	5.7764	5.9004	5.77	5.4555	5.6915	5.1595	4.9764	5.8112	5.3498	5.8622	5.1659	5.5059	6.2823	5.8878
DNAJC11	-1.038	-0.725	-0.685	-0.3346	-0.776	-0.417	-0.6304	-0.8997	-0.4422	-1.2142	-0.9051	-0.4901	-0.7515	-0.6484	-0.949	-0.125	-0.5353	-0.3492	-0.9269	-0.6897	-0.5395	-0.8625	-0.8443	-1.2413	-0.8365	-1.3771	-1.6804	-1.1943	-0.8417	-0.8314	-1.3846	-0.8625	-1.0589	-0.5713	-1.077	-0.8651	-0.6735	-0.5416	-0.48	-0.5105	-1.1203	-0.7984	-0.9828	-0.415	-0.2413	-0.1714	-1.7515	-0.7037	-1.2413
AKR7A3	-1.4982	-0.9885	-1.1203	-1.077	-1.7274	-1.6439	-1.4941	0.517	-0.4739	-1.3585	-1.3696	-1.0469	-0.7108	-1.5437	-1.4779	0.0922	-0.9241	-1.3076	-1.8468	-1.8365	-1.221	-1.6126	-1.6215	-1.041	-0.6326	-2.1016	-2.2515	-1.5105	-1.4982	0.7111	-2.0233	-1.2076	-0.4383	-1.2584	-1.3255	-1.2243	-1.4112	-1.8783	-1.6943	-1.811	-1.7959	-1.6304	-1.527	-0.5543	-0.7735	-0.7612	-2.5995	-1.7084	-1.6394
CYP4Z1	1.111	3.5801	1.3179	0.4936	3.7049	1.7198	2.3443	1.3829	2.7577	2.854	3.4236	4.4957	0.1609	1.2504	3.1698	NA	0.7128	5.841	0.6808	3.5789	2.3159	5.2468	NA	6.5975	2.1303	NA	0.8671	2.2485	2.6161	2.2409	NA	4.2087	1.4271	2.5195	2.7506	5.503	3.0259	3.3688	1.0257	NA	2.6371	4.0295	5.2176	4.0418	3.8787	0.6201	NA	0.9343	0.4447
HIST2H2AA3	-0.8211	1.2684	1.7862	2.7011	0.4647	0.8432	-0.776	1.275	-1.1488	-0.5249	0.2327	0.8024	0.6853	0.8303	0.0759	0.4201	0.3741	0.5888	0.9381	0.926	1.6595	0.9283	1.7407	-0.5778	0.5089	0.0676	0.6295	1.3929	1.301	0.0129	0.8327	2.6327	1.275	-0.6016	-0.3237	-1.3771	0.9583	0.6817	0.1414	3.4316	0.4803	1.107	-0.1488	0.6397	-0.7934	1.5636	0.2228	1.8742	-0.304
GCLM	-1.9602	-2.5821	-1.852	-2.1392	-1.4344	-2.3004	-2.2515	-2.3292	-2.5228	-2.2934	-1.2515	-2.2515	-2.2934	-2.6349	-1.1234	-2.4344	-2.5735	-1.3364	-1.9714	-1.454	-1.7037	-2.5479	-2.662	-1.8365	-1.415	-1.816	-1.6897	-1.1552	-1.699	-2.8573	-0.9241	-1.2311	-1.9546	-2.0831	-2.4189	-3.1078	-2.6804	-1.699	-2.3076	0.189	-0.8443	-2.2515	-2.0831	-2.9434	-2.2934	-2.2176	-1.2345	-0.567	-2.0893
PPP2R3A	0.7373	-0.0029	0.1204	-0.9132	0.2963	-0.0469	0.0718	-1.152	-0.692	-0.7539	0.2016	-3.422	-0.1844	-1.2413	-0.527	-1.8468	-0.6148	-2.071	1.2839	0.0426	-0.3492	-0.0574	-0.4921	0.1322	0.1725	0.648	0.3785	0.6708	-0.3022	-1.4901	1.4573	0.4276	0.4425	0.3208	-0.2584	0.3219	-0.3978	0.3161	-0.3201	1.4098	0.3918	0.2216	0.3068	-0.5332	-0.2619	-1.2481	0.6844	0.669	-0.4921
C1orf19	-0.9658	-0.811	0.2546	-0.4659	0.251	-0.458	-0.6215	-0.1172	-0.8237	-0.2567	-0.737	-0.8443	-0.6666	-1.1456	-1.0262	-0.7442	-1.0649	0.3482	-0.5995	-0.7834	-0.7959	-0.2898	-0.038	-0.2934	-0.9828	-0.415	0.6239	-0.0014	0.1953	-0.7037	0.1789	-0.1552	-0.484	-0.8997	-0.8599	-0.462	-0.458	0.0286	-0.662	-1.0116	-0.5628	-0.3771	-1.1234	-0.4501	0.0243	-0.2706	-0.0174	-0.5146	0.0215
BPNT1	-0.5951	-0.3076	1.1635	0.7347	-0.7884	-0.4016	-1.737	0.5646	0.8359	-0.816	-1.2969	0.7476	-1.3255	-1.4035	-1.7959	0.7424	-0.6873	-0.077	-2.0831	-1.6804	-0.9799	-1.2653	-0.8009	-1.6574	-0.3094	-0.3827	-0.8391	-1.0439	-0.7394	-0.0189	-1.3292	-0.6282	-1.1844	-1.2653	-1.5951	-0.7984	-0.9214	-1.0087	-1.7563	-1.114	-0.6643	-0.9518	-1.4422	-0.5084	-0.7226	-0.749	0.3962	-1.0087	-1.4305
C1orf9	-0.3921	-0.3771	0.7459	0.8969	0.9493	0.4201	0.0718	0.269	0.2437	0.1057	-0.6967	0.5251	-0.2142	0.08	-0.2176	-0.1828	0.0215	0.8726	-0.725	0.6192	-0.4189	0.123	-0.0321	-0.4131	0.1017	-0.074	0.9298	0.8836	0.7974	-0.3827	1.2992	0.4542	-0.5395	-0.1361	0.1596	0.8383	0.3796	0.1979	0.3022	-0.5799	0.3437	0.4071	0.4813	0.2079	0.6772	-0.3364	1.0433	0.5578	-0.0923
ICMT	-0.2934	-1.2934	-0.5437	-0.1894	-0.7612	-0.4208	-1.3255	-1.6126	0.4977	-1.7809	-1.771	-0.3659	-1.1649	-0.9602	-1.5023	-1.4344	0.1283	-1.2515	-1.7661	-0.8288	-0.5649	-0.9799	-1.1456	-2.1329	-0.8783	-0.3219	-1.1266	-1.7084	-0.8009	-1.1617	-0.3659	-1.0985	-1.1976	-0.873	-1.6349	-1.6304	-1.1811	-0.6461	-0.5821	-1.6349	-0.9214	0.0936	-0.6082	-0.771	-0.8783	-0.1094	-1.071	0.0086	-1.0499
S100A3	-1.8625	-2.2653	-2.2863	-2.0469	-2.3959	-1.6126	-1.7037	-0.725	-2.0058	-2.2515	-2.0291	-1.0174	-1.5522	-1.8365	-1.4501	-0.9771	-2.3585	-2.3147	-2.0174	-1.685	-2.152	-1.6943	-1.7274	-2.4189	-2.4035	-1.9214	-2.1392	-2.1016	-1.9379	-1.9546	-2.0058	-2.1584	-1.9379	-2.2863	-2.0291	-2.3585	-1.6574	-1.662	-2.3437	-1.5395	-1.852	-0.2969	-2.2243	-2.2934	-2.152	-1.3511	-2.3437	-1.0893	-1.3474
CROCC	-0.0247	-0.0291	0.1519	-0.2863	-0.3004	0.1097	0.4265	-0.0395	-0.0589	-0.1031	-0.125	-0.0559	0.1217	0.4761	0.1467	0.4563	0.0663	-0.527	0.2191	-0.2092	0.2928	0.1493	0.069	0.3426	-0.0262	0.08	-0.7179	-0.1584	-0.3022	0.0172	-0.2379	-0.5043	0.2786	0.474	0.3208	0.3595	0.5539	-0.0939	0.4093	-0.0262	0.0881	-0.2723	0.0426	0.364	0.3346	0.3929	-0.4521	-0.3237	-0.5353
SYT2	-1.1584	-0.2584	-0.9856	0.4038	0.8375	-1.3921	-1.3004	-1.1016	-0.9434	-0.9351	0.7527	0.3539	-1.1016	-1.304	-0.776	-0.5249	-1.5023	-0.8059	-1.4779	-0.2413	-0.8836	-1.1552	1.168	1.4441	-1.482	-0.0043	-1.6666	0.0144	-1.4189	-2.0589	-1.8468	-1.5606	-1.1392	-0.963	-1.0321	1.751	-0.8365	-0.152	-1.1779	-0.3789	-1.0589	-1.1266	-0.9051	-0.3022	2.0314	-1.074	0.0813	-0.3733	-1.1234
RPS6KC1	-0.2092	-0.4921	0.7268	-0.1047	-0.0725	-0.1408	-0.2775	0.2892	0.0663	-0.8757	-0.1811	0.2461	-0.5187	-0.3771	-0.46	-0.458	-0.2481	0.2904	-0.3585	-0.152	-1.1361	-0.2076	0.688	-0.7984	-0.0877	-0.074	0.9862	-0.226	0.1953	-0.1993	0.5945	-1.0619	-1.0649	-0.8391	-0.6016	-0.6827	0.1322	0.4394	-1.1811	0.051	-0.125	-0.2109	-0.7442	-0.2671	0.0398	-0.5395	0.3391	0.107	-0.255
RBM8A	-1.4779	-1.6082	-0.3696	-0.7612	-0.5564	-0.6371	-1.6304	-1.4422	-0.5084	-1.0439	-1.9324	-0.281	-1.2688	-1.3292	-1.7084	-1.6126	-1.1297	-0.6016	-0.8365	-1.1746	-1.8625	-1.2379	-0.1172	-1.191	-1.1779	-1.038	-0.4759	-0.7637	-0.7539	-1.2758	-1.071	-0.482	-1.6126	-1.9714	-1.4305	-0.6827	-1.1047	-0.6082	-1.4779	-0.4982	-1.1681	-1.0145	-1.5606	-1.0087	-0.5208	-1.3959	-0.3328	-1.1746	-1.2277
MGC15634	-1.0291	-0.0786	0.8695	0.9826	1.082	1.546	0.2928	0.0922	0.7974	0.7084	0.539	0.622	-0.016	0.3265	-0.2584	0.3984	0.9819	-0.1811	-0.949	0.1878	0.7941	-0.243	1.511	0.745	0.5231	0.6098	0.1309	-0.3401	0.3663	0.7022	-0.8391	-0.2533	0.2786	0.7664	0.1852	1.5969	-0.0439	-0.5084	-0.6967	0.0412	0.2951	-0.2602	-0.5628	0.4803	0.2141	0.8999	1.4367	-0.5208	0.1903
ZMYM4	-0.1282	-0.0908	0.3752	0.6489	0.7031	0.6987	0.9957	-0.1297	-0.077	0.1789	0.1057	0.3818	0.0909	0.1467	0.2154	0.0759	-0.0321	0.4372	0.5993	0.6933	1.5763	0.2179	0.4362	0.2363	0.3033	0.6817	0.583	0.5724	0.7242	-0.7274	0.4605	0.7974	0.2558	0.8115	0.3918	0.5859	0.0566	0.5211	0.3173	-0.3959	0.5099	0.301	0.5695	0.3437	0.8115	0.0468	0.4699	0.688	0.1454
TMEM69	-1.074	-0.8943	-0.7984	-1.1361	-0.8237	-0.8314	-0.8365	-1.304	0.037	-0.9241	-0.7563	-1.0145	-1.041	-1.071	-1.1203	-0.9269	-0.281	-0.3201	-0.662	-1.3292	-0.0116	-0.8262	0.5261	-1.1584	-0.5649	-0.0072	-0.4739	-0.8034	-0.4639	-0.6326	-0.6735	-0.7466	-0.699	-0.1472	-1.1649	-0.1828	-0.5064	-1.1811	-0.9574	-0.7037	-0.6597	-0.8997	-0.4521	-0.852	-0.4719	-0.3237	-0.8573	-0.6827	-1.1266
ELF3	0.4082	1.4673	1.2104	1.4526	1.0426	1.005	0.0286	1.6281	2.5016	1.0029	-0.1763	1.569	1.232	1.0186	-0.6643	1.739	1.8363	1.6211	0.3437	-0.1297	1.6535	0.3437	-0.3201	1.6415	1.051	-0.9296	-0.1926	0.8544	1.1382	2.7908	-0.7179	2.359	0.9664	1.2576	0.6808	1.9557	2.266	1.3578	1.373	0.779	-0.1219	0.3127	0.7689	1.2516	1.568	1.1661	1.4206	0.6535	-0.8599
ITGB1	0.7807	-0.038	0.9084	0.6871	-0.2533	0.9404	0.3885	1.0079	0.2558	0.6462	0.4854	0.2141	0.0129	0.8734	0.5926	1.0144	1.1903	0.1349	0.6397	1.5888	0.037	1.111	1.0151	-0.2602	0.8568	0.9664	1.1545	0.1725	0.2928	1.2277	1.3567	-0.2951	0.0922	-1.1844	-0.1779	-0.48	1.1545	-0.0954	-0.0058	0.3265	-0.1392	1.8294	0.3796	0.1414	0.5221	-0.7418	0.5059	1.1821	1.6645
YME1L1	-0.255	-0.6394	-0.5105	-0.6082	-0.9406	-0.0559	-1.1361	-0.6394	-0.7784	-0.7442	-0.3771	-0.7037	-1.1746	-0.8417	-0.5585	-1.0174	-1.2109	-0.3437	-0.6326	-0.692	-0.5735	-0.1552	-1.0499	-0.7539	-0.725	-0.2076	0.5509	-0.4403	-0.7108	-1.2009	0.0909	-0.3511	-0.527	-1.9434	-1.0954	-1.2898	-0.9132	-1.2447	-0.8288	-1.0058	-0.3346	-0.6552	-0.5084	-0.4901	-1.1943	-0.4305	-0.48	-0.4961	-0.0634
ACF	-4.227	-4.399	-4.7331	-4.0116	-3.3219	-2.8262	-2.6712	0.8774	-5.673	-4.3899	-2.3219	-3.7027	-3.6047	-2.9546	-2.191	1.0573	-4.9839	-4.257	-2.9214	-4.2189	-4.7447	-4.1103	-2.8365	-3.776	-5.8448	-3.5278	-5.6511	-5.2821	-4.9794	-3.2934	-4.071	-3.9192	-4.3133	-4.093	-4.161	-3.6547	-3.2243	-1.5228	-4.1053	-2.9771	-3.3467	-3.6135	-3.6971	-3.4438	-4.028	-3.1203	-5.0445	-4.5873	-3.716
GPAM	-1.1329	-1.1584	-0.3622	-2.1649	-1.7322	-2.7661	-3.3437	-1.4941	-0.9187	-3.1078	-1.5821	-2.6259	-3.735	-1.9658	-3.1844	-3.3974	-2.3364	-2.1016	-1.5064	-2.2584	-1.4228	-1.3437	0.1401	-1.4779	-2.077	2.1928	-1.3622	-1.7037	-1.0291	-2.6171	-1.6574	-2.0954	-0.2379	-1.0291	-2.0233	-2.6529	-1.1172	-2.2723	-1.2311	-1.7226	-0.737	-2.5312	-1.458	-1.5105	-1.8417	-1.8783	-0.7809	-1.5437	-1.9214
ITIH5	1.3323	-0.6758	-1.8211	-0.0877	-0.4779	-3.5446	0.4936	0.7424	-0.5886	1.7904	0.3426	-1.8625	-0.7909	0.8278	0.7553	-0.897	-0.6304	-0.9971	-0.6484	-0.3183	-1.7959	0.069	-2.9771	0.6471	-0.0908	-1.2758	-0.1697	-0.9379	1.129	-0.567	0.3334	-2.3733	0.127	-2.0529	1.9888	0.8797	-1.5821	-0.9885	-0.3255	-0.5395	-0.811	-1.0954	0.5281	0.7093	-0.3058	-2.7959	-1.7418	-1.9269	0.3437
SLC16A12	NA	1.3757	NA	-1.8783	NA	NA	NA	NA	0.0257	NA	0.2079	NA	NA	NA	NA	0.636	0.2497	NA	NA	NA	NA	NA	NA	NA	NA	NA	0.8464	0.8392	NA	-0.16	0.6313	0.2277	NA	NA	NA	NA	NA	0.0895	NA	0.6022	0.2029	NA	NA	NA	-0.4286	NA	NA	NA	0.1928
C10orf6	-0.3346	-0.5166	-0.7563	-1.038	-0.6758	-0.9406	-1.0439	-1.1746	-0.9799	-0.5105	-0.7442	-0.5437	-1.5353	-0.8546	-0.5649	-2.1329	-1.0145	-0.7131	-0.5084	-1.0058	-0.6394	-1.0679	-0.3165	-0.5479	-0.035	-0.173	0.1827	-0.5479	-0.9434	-0.4941	0.5049	-0.5907	-0.6506	-0.9324	-1.2277	-1.2243	-0.2176	-1.3437	-0.8651	-0.2916	0.0072	-0.255	-0.0336	-0.8997	-0.9434	-0.0291	-0.9241	0.2302	-0.2362
FBXW4	-0.5395	0.1635	-0.5564	-1.4266	-1.2793	-1.4422	-1.4659	-0.3659	0.33	-0.4208	-0.3474	0.069	-0.5864	-1.0087	-1.1016	-1.3808	0.103	-1.6259	-1.0801	-1.9771	0.6599	-0.9856	-0.8494	-0.3548	-0.897	-2.0529	-2	-0.6597	-1.2758	0.3796	-2.7179	-0.7202	0.4521	-0.7013	-1.5064	-0.394	-0.2498	-1.4699	-0.3022	-1.3659	-0.9602	-1.4901	-0.6712	-0.3147	-0.4921	-0.6781	-0.9269	-2.035	-1.699
C1orf106	1.1532	1.2648	2.1164	2.4639	2.8012	2.5912	0.7058	4.2623	3.187	2.362	1.3265	2.5223	1.5145	1.2957	0.7908	3.7257	2.4494	1.6131	2.9111	0.069	0.3618	1.4457	2.3357	2.7424	2.6048	1.9884	1.569	2.1187	1.7424	3.9607	0.8671	1.5893	1.9088	1.3978	0.5519	1.4212	0.516	1.9084	-0.2311	2.5683	1.6902	1.9862	1.4319	2.2645	1.7916	1.9742	2.0409	1.606	1.0628
DDIT4	-0.2636	1.8663	-0.1313	0.3448	-2.2109	1.3533	-0.8704	0.1801	1.441	-0.8573	0.2916	1.5893	0.8383	1.2552	0.6378	0.987	0.9501	0.5888	-1.6038	-0.2447	1.6415	0.7941	1.1596	-1.2109	1.0335	-0.6416	-1.5995	-1.6259	0.1043	1.364	-0.3094	1.1077	0.4103	0.7137	-0.3978	-0.5929	1.1184	-0.486	-0.7563	0.4383	0.0384	0.5666	-0.7442	0.4457	-1.3921	0.4265	0.3208	0.4865	-0.6597
MGMT	0.3752	0.679	0.8504	0.1124	0.0426	-0.1282	-0.041	0.7874	0.9351	0.8584	-0.071	0.3471	-0.0439	0.4114	0.6636	1.0342	0.4071	0.0963	0.308	-0.1172	0.8286	0.5251	0.7816	0.7198	0.745	-0.6394	-0.3978	0.3651	0.2798	1.216	0.2975	1.0321	0.8544	0.1322	0.4813	0.1725	1.121	0.0786	0.4865	0.0014	0.6313	-0.0664	0.2881	0.4709	-0.1203	0.0043	-0.0043	0.2869	0.1467
FAM13C1	NA	NA	NA	NA	NA	NA	NA	NA	NA	NA	NA	NA	-0.5886	NA	NA	NA	NA	NA	NA	NA	NA	NA	-1.0291	NA	NA	NA	NA	NA	NA	NA	NA	NA	NA	NA	NA	NA	NA	NA	NA	NA	NA	NA	NA	NA	NA	NA	NA	NA	NA
PIP5K2A	1.1414	1.0594	1.2016	1.9149	0.3448	0.9222	1.3885	1.2666	-0.2294	0.5627	1.2302	0.7604	0.7655	1.6003	1.7398	1.4988	0.3629	1.7757	1.2768	2.0813	0.8938	0.8813	1.3074	0.2857	0.1388	1.308	1.8972	0.7949	1.4383	0.6862	1.7194	0.2582	0.0172	-0.0604	1.8057	0.0909	1.2594	1.8813	0.9434	0.9038	1.5246	0.9115	1.2934	0.4792	0.9252	0.8278	0.8392	1.546	1.6253
FAM45B	-0.1861	-0.3529	0.3288	-0.4208	0.1322	-1.0174	-0.6873	0.4082	-0.9518	-0.3659	-0.3846	-0.6827	-0.5649	-0.1617	0.1699	0.111	-0.6758	-0.2396	0.1414	-0.074	-0.6304	-0.6038	0.7329	-0.3752	-0.6967	0.2016	0.189	0.0895	0.3994	-0.6259	0.6978	-0.454	-0.5756	-0.873	-0.5692	-0.699	-0.3677	-0.071	-0.0321	0.4005	0.0718	-0.0574	-0.1282	-0.4659	-0.5522	-1.3364	0.537	0.0813	0.184
ECHS1	-0.8417	-0.3997	0.2376	-0.6304	-0.7298	-1.3437	-1.1488	-0.364	-0.3566	-0.5907	-0.3364	-0.3997	-0.8237	-0.7346	-0.3771	-0.1282	-0.2602	0.3196	-0.274	-1.1746	-0.4403	-0.9324	-0.0336	-0.4719	0.069	-1.1649	-1.0589	-0.7515	-0.8836	0.1991	-0.5649	-0.6371	-0.3492	-0.7298	-1.3548	-0.7108	-0.486	-1.2413	-0.5043	-0.6873	-0.7155	-1.1456	-1.0174	-0.1993	-0.8314	-0.4481	-1.2934	-0.7013	-1.0469
DNAJC9	-1.0862	-1.3884	-1.1681	-1.1746	-1.6082	0.069	-1.5146	-1.5522	-0.6781	-1.1877	-1.3292	-0.1172	-1.2481	-1.1584	-1.3474	-0.897	-1.6126	-0.1329	-1.1392	-1.5606	-1.1109	-1.5907	0.3796	-1.4501	-1.4266	-0.486	-0.0189	-1.527	-0.4344	-1.6712	-0.685	-1.6349	-0.9462	-2.0649	-1.5228	-1.9658	-1.2009	-1.8625	-1.3696	-0.2362	-0.852	-0.5799	-1.5105	-1.3959	-1.6897	-0.8034	-1.0985	-0.5543	-0.9856
GHITM	-0.9241	-0.3827	-0.706	-1.3292	-0.4941	-0.5332	-1.1617	-0.6804	-0.7179	-0.417	-0.5821	-1.1172	-1.191	-0.8757	-0.3696	-0.5799	-1.1392	-0.6529	-0.8211	-1.114	-0.6643	-0.7784	-0.5735	-0.6259	-0.725	-0.7959	-0.749	-0.5606	-0.9105	-0.7346	-0.1584	-0.5023	-0.4016	-1.3622	-0.9942	-0.9799	-1.1976	-1.4112	-0.7784	-0.1976	-0.173	-1.1297	-0.3419	-0.7686	-1.1329	-0.8757	-0.1746	-0.486	-0.706
DUX4	-0.3219	-0.2026	-0.2413	-0.1552	0.1283	-0.1047	0.0412	0.1204	-0.6712	-0.48	-0.2934	-0.0291	0.0827	-0.0336	-0.016	0.0868	-0.5995	-0.6758	-0.2584	0.1097	0.0243	0.0922	-0.1329	-0.1094	-1.2042	-0.2193	-0.897	-0.0786	-0.4035	-0.3715	-0.1926	-0.0695	-0.2311	-0.2828	-0.0679	-0.5312	0.0086	-0.0589	-0.5416	-0.035	-0.3771	-0.2193	-0.2688	-0.038	-0.144	-0.3129	-0.8365	0.2079	-0.2688
OSBPL1A	-0.2793	-0.2533	0.4977	-0.3733	1.1223	-2.0058	0.6022	0.2869	-0.255	0.3357	0.1648	-1.454	0.7207	-0.2447	1.051	-0.8573	1.0875	-0.1943	0.0043	0.6799	-0.9574	-0.5416	1.7753	0.1097	-0.2345	-1.2447	-0.0277	0.4489	0.5499	-0.0218	0.3561	0.1712	-0.0101	-1.0862	0.4895	0.5251	0.2216	0.0649	0.3403	-0.486	-0.2243	0.5519	0.9679	-0.2413	0.3829	-0.0072	-0.6967	0.7216	0.8836
MYPN	-1.482	-3.4917	-3.1329	-2.7661	-3.7661	-3.7999	-3.9105	-4.0541	-3.6675	-3.9302	-3.4097	-3.9062	-3.5278	-3.7065	-4.458	-0.0087	-2.9546	-2.6897	-3.5047	-1.074	-2.6804	-2.9546	-3.4127	-3.1584	-4.257	-1.5353	-3.3452	-2.8468	-2.2584	-3.4884	-2.6529	-2.3733	-2.5064	-3.0589	-2.2584	-4.7065	-3.1203	-3.0589	-2.3364	-1.9159	-1.8059	2.5148	-2.7959	-3.4884	-3.3219	1.8643	-0.7661	-2.4659	-0.7394
PIK3AP1	3.6893	3.012	2.5281	3.373	2.1674	0.6229	2.1612	2.5777	1.5509	1.1368	2.3106	1.8789	1.515	2.5193	3.5729	2.6095	3.1263	2.9977	2.1786	1.8616	2.3989	0.9767	2.6171	2.3135	3.8217	1.2945	4.0347	2.121	1.8396	3.5509	3.3882	1.2815	2.1467	1.5845	2.3587	1.9351	3.4634	1.7181	2.2504	3.1707	3.1827	2.4008	3.0102	2.3185	0.2425	2.6627	0.3618	2.7457	3.1127
DDX50	-0.6758	-0.46	-0.1488	-0.5146	-0.3147	-0.0058	-0.4403	-0.5064	-0.3622	0.3231	-0.2653	-0.6171	-0.7013	-0.1763	-0.2464	-0.3865	-0.9187	0.3173	-0.0306	-0.3585	-0.2619	-0.3529	0.4319	-0.0985	-0.0058	0.6211	0.9493	-0.1016	0.1966	-0.4131	0.5018	-0.2413	-0.2193	-0.949	-0.0454	-0.2723	-0.3511	-0.3183	-0.1329	-0.1811	0.1966	-0.3659	-0.0664	-0.243	-0.4759	-0.6282	0.4605	-0.0695	-0.0218
ALOX5	3.4155	3.1152	2.5539	2.7119	2.5504	3.6949	2.6371	3.4515	2.3403	3.3937	3.2135	1.1382	2.7086	2.9614	3.9136	3.9973	2.7954	3.2068	3.5814	3.6554	2.4665	2.9464	0.6041	3.6747	2.9345	2.1792	2.8912	2.7194	2.7828	3.4155	2.6112	1.6257	3.0295	1.7723	3.1912	3.0542	2.6877	2.3774	2.5313	2.386	3.5033	2.0104	2.9993	2.9209	2.5658	2.6196	1.2461	3.4005	3.797
DUSP13	0.5008	-2.6259	-2.1456	-2.4982	-3.1329	-2.8059	-3.1203	-2.3004	-3	-3.035	-3.0469	-2.816	-2.6804	-1.4035	-0.8546	-2.2863	-1.776	-2.7859	-1.7274	0.5907	-3.1714	-1.6439	0.511	-3.1976	1.0718	-2.0589	-3.4297	-3.4066	-2.5064	-3.3076	3.176	-3.1714	-3.3393	-4.1103	-2.191	-3.5446	-2.6082	-1.2515	-1.7859	-1.3921	1.9404	-2.8262	-2.2793	-1.2723	-1.9159	-2.8059	1.8225	-0.0908	-3.5942
PAPSS2	-0.7037	0.6201	-0.0087	0.127	-1.3511	-1.2863	-0.4189	-0.041	1.1538	-0.897	0.1401	1.2887	0.1878	-1.0321	-0.1282	0.144	0.3573	-1.1877	-1.7959	-0.8599	1.959	-0.4461	-0.281	-0.6016	0.175	-1.3183	-1.0029	-0.8863	-0.8034	-0.1779	0.8616	1.3618	0.0115	0.848	-0.3865	-1.7131	0.099	-1.1617	-0.4383	-0.0043	-0.725	-0.5929	0.6969	-1.2176	-1.3771	-1.4901	0.3334	0.4308	-0.3094
FAM53B	0.8408	0.4168	0.6406	0.3874	0.3092	0.5724	0.7999	0.5705	0.472	0.3663	0.7799	0.4885	0.4542	0.856	1.0321	1.3161	-0.6873	0.5772	0.7983	0.9899	0.4016	0.8584	0.7312	0.3231	0.0704	0.6012	0.0384	0.5714	-0.1219	0.2881	0.2774	0.3874	0.5869	0.8156	0.7485	0.2881	1.0236	0.9381	0.3785	1.4141	0.6452	0.4699	1.2154	0.6257	0.4489	0.6126	0.5231	0.5753	0.6079
NEBL	1.4761	-0.364	0.8074	-0.8468	-2.0529	-1.2009	-0.0725	1.069	-0.5606	-0.3383	-0.5479	0.0772	-1.1552	0.4478	-0.5929	1.0621	-1.3147	2.6962	-2.4112	-0.3237	-0.6304	-0.8546	-0.1266	-0.4639	-0.9658	1.6512	1.908	-0.144	-0.7637	-0.152	1.0426	1.4114	0.0482	-1.7418	-1.3474	-0.1361	0.107	-0.737	0.0314	-1.1456	-0.173	-0.9828	-0.0203	0.6126	-1.0174	0.0786	-1.3111	-0.5312	-0.2126
ANKRD2	-1.6758	-1.6259	-1.9546	-1.7179	-1.889	-1.1552	-1.737	-1.6804	-1.8009	-2.2515	-1.6666	-1.8059	-1.9602	-1.3183	-1.2688	-1.1203	-0.8573	-1.7612	-2.0529	-2.3437	-0.725	-1.5228	-1.8678	-2.4501	-2.5064	-1.5105	-3.1456	-2.5479	-2.3147	-1.5105	-1.458	-1.7274	-2.3733	-2.4344	-2.2109	-2.2934	-2.0649	-1.4266	-1.6574	-1.1078	-1.3076	-0.8757	-0.9406	-1.1329	-2.035	-1.8262	-2.3511	-2.5146	-1.5995
CPT1A	-0.3733	0.8278	-0.0203	0.0158	-0.281	-0.9942	-0.4266	0.8726	-0.3921	-0.7394	0.6341	-0.5951	0.1725	0.0215	0.0731	0.8821	-0.9159	0.7849	0.3369	-0.0786	-0.3865	-0.4461	0.7545	-0.6082	-0.2413	-0.685	0.364	-0.1361	-0.5312	0.2388	0.5291	0.779	-0.2951	-1.077	0.5617	-0.6416	0.0454	-0.2898	0.051	0.3103	0.1296	0.0552	0.4125	-0.5564	-0.1062	-0.3511	0.2351	-0.462	0.1557
CDK2AP2	-0.1697	0.739	-0.0574	-0.8084	-0.9241	-0.281	-0.0544	-0.1959	0.2951	-0.3237	0.5099	-0.3456	-0.1156	1.1144	-0.6666	0.5519	-0.2584	0.2461	-0.8573	-1.2934	-0.0816	0.2351	-0.9799	0.7225	-0.3383	-1.1779	0.9664	0.3718	-0.7108	-0.2294	-0.1959	-0.7539	1.4141	0.8262	-1.035	0.4457	-0.2277	-1.0439	-0.6126	1.1763	-0.749	-0.8135	-0.776	0.355	-0.5995	0.6192	-0.7418	-1.737	-1.6304
C22orf26	-1.8009	NA	0.5743	-0.9078	NA	-0.7515	-2.3147	-0.2533	-0.2277	-0.4016	NA	-1.2828	-1.6215	NA	-1.035	-1.5105	0.2116	-2.0649	NA	-1.4228	-3.1329	-0.5125	NA	0.0922	-0.6827	-0.6484	-0.5649	-1.1488	NA	-0.3511	-0.5023	-0.6461	-0.0087	NA	-0.6148	-2.9105	0.547	-0.1172	NA	-0.662	-2.0589	-1.0559	-1.4941	NA	-1.3808	NA	-0.6758	-1.191	-0.881
CORO1B	-0.527	-0.3165	-0.2723	-0.8339	-1.482	-0.6712	-1.1811	-0.7515	-0.3827	-0.9324	-0.5821	-0.692	-0.4403	-0.2951	-0.5084	-0.8084	-0.4112	-0.3997	-1.2176	-1.4383	-0.7298	-0.8339	-1.5995	-1.1016	-0.8573	-0.9686	-0.5951	-0.6171	-0.8211	-0.4055	-0.6171	-1.1172	-0.5002	-0.9324	-0.7588	-0.9942	-0.3585	-1.1297	-0.5585	-0.5735	-0.3437	-1.0058	-0.7202	-0.5973	-0.771	0.1725	-0.9296	-1.4659	-1.1456
SCT	1.3208	-0.7466	1.0447	0.8867	0.2376	0.433	-0.6827	-0.8443	0.0594	-1.1877	-0.5064	0.0566	0.545	0.3896	0.6069	1.1744	-0.5332	-0.2775	0.4834	0.6645	-0.7131	0.8552	-0.2447	-0.662	-0.8211	2.6868	-0.4422	-0.7155	-0.3752	-0.9024	0.9245	-1.0029	-0.9914	-1.3622	0.058	-0.7346	1.57	0.2833	-0.5778	0.6088	0.3505	-0.2294	-0.6148	0.0909	-0.6237	-0.2311	0.0172	-0.4921	-0.3959
PSMC3	-1.3659	-1.1779	-1.1361	-1.7322	-2.077	-1.5995	-2.4344	-2.114	-0.3997	-1.3696	-2.2311	-0.9546	-1.255	-2.1976	-2.2243	-2.4659	-0.7108	-1.1392	-2.3959	-2.5146	-1.1424	-1.4461	-2.5995	-1.6304	-1.0893	-2.1584	-2.2793	-1.9214	-1.6484	-0.8651	-1.7612	-1.7661	-1.4659	-1.6804	-2.1584	-1.7274	-1.1109	-2.6439	-1.816	-1.6439	-2.0116	-1.8365	-2.3004	-1.2379	-1.4982	-1.2515	-2.3004	-2.5312	-2.2934
GYLTL1B	-0.4286	-0.6484	0.4179	-0.2379	-0.4383	-0.776	-0.2142	-0.7179	-1.1172	-0.7563	-0.394	-0.9132	-1.0262	-0.456	-0.5416	-0.16	-0.9324	-1.1488	0.0101	-0.8546	-0.4442	-0.7612	0.3896	-0.4941	-1.1047	-0.2243	-0.1926	-0.5458	-0.685	-1.4228	-1.415	-0.8997	-0.6371	-0.2653	-0.281	-0.6326	-0.2916	0.0201	0.5211	-0.9296	-0.5146	-1.1297	-0.7686	-0.3129	0.1941	-1.0831	0.4468	-0.8034	-0.9602
NDUFS5	-2.6897	-2.8997	-2.6171	-2.1392	-1.9051	-2.482	-2.2447	-3.1329	-1.8678	-2.7084	-2.737	-2.0529	-2.4739	-3.0954	-2.6439	-3.2653	-2.4901	-1.8997	-2.4659	-2.1714	-1.6712	-2.7179	-0.963	-3.0469	-2.3884	-2.7466	-2.3076	-3.035	-2.191	-2.9324	-2.3004	-1.9658	-2.9658	-3.1584	-2.7859	-1.4422	-2.5228	-2.4422	-3.071	-3.035	-2.776	-2.1016	-2.152	-2.662	-1.9942	-3.1714	-2.0831	-2.3585	-2.3437
C11orf2	-0.114	0.5291	0.229	-0.8237	-0.9187	-0.0514	-0.1552	-0.1811	0.1686	0.0243	0.0144	-0.2533	-0.0529	-0.1203	-0.3111	-0.0985	-0.0985	-0.304	-0.3058	-0.6326	0.0552	-0.3808	-0.6643	-0.1203	-0.2706	-0.5064	-1.1746	-0.3808	-0.5929	0.0014	-0.4699	-0.1877	-0.226	0.0398	0.1017	0.0868	-0.041	-0.2845	-0.2515	-0.3789	-0.1329	-0.749	-0.114	0.103	-0.2863	0.2786	-0.5084	-0.9214	-0.7612
CDCA5	-2.4901	-4.5496	-2.2723	-2.5228	-3.3644	-1.1329	-3.7779	-4.8489	-2.482	-4.2109	-3.9236	-1.6529	-1.8059	-2.9771	-3.889	-1.3733	-3.9726	-1.486	-2.5735	-3.1844	-3.9703	-4.3808	-1.3585	-4.7255	-3.4454	-1.5995	-2.4422	-3.9954	-2.3511	-5.1028	-1.9159	-4.2821	-4.2109	-3.5977	-4.0856	-4.4643	-2.4901	-3.0233	-3.7959	-1.2142	-2.7274	-1.6038	-3.4344	-4.0493	-4.6915	-1.5312	-3.662	-2.2653	-2.6897
SF3A1	-0.9828	-1.0499	-1.0619	-1.3219	-1.4112	-1.0262	-1.5105	-0.9024	-0.6082	-1.2828	-0.7686	-1.1617	-1.2142	-1.3511	-1.3292	-1.4461	-1.1617	-1.3111	-1.5778	-1.6439	-0.5002	-1.1714	-0.6237	-0.7539	-1.2345	-1.7274	-1.0589	-1.2109	-1.1047	-0.949	-1.873	-1.7418	-0.897	-1.5105	-0.9518	-1.1361	-1.2969	-2	-1.2723	-1.304	-1.4901	-1.3548	-1.3255	-0.6758	-0.6943	-1.1109	-1.9269	-1.3401	-1.4383
RELA	-0.3585	-0.1681	-0.1472	-0.9942	-1.2009	-0.5864	-0.7934	-0.6016	-0.3419	-0.7131	-0.7179	-0.5799	-0.3978	-0.6126	-0.7563	-0.3511	-0.5479	-0.5821	-1.2447	-1.1617	-0.4982	-0.6597	-1.0116	-0.7298	-1.2688	-1.1016	-1.7037	-0.8625	-0.9686	-0.3771	-0.8625	-0.9574	-0.662	-0.662	-0.8034	-0.4074	-0.5778	-0.8417	-0.7084	-0.4325	-0.963	-0.9828	-1.0087	-0.4679	-0.8573	0.2066	-0.9771	-1.1779	-1.2758
PELI3	0.0895	0.2642	-0.0604	-0.3978	-0.4481	-0.173	-0.2934	-0.3846	-0.7037	0.1865	-0.5735	-0.8135	-0.3219	-0.6371	0.0552	-0.0043	-0.7612	-0.7934	-0.1329	-0.3659	-0.8237	-0.3884	-0.7084	0.24	-0.6712	-0.5522	-1.2042	-0.48	-0.5692	-0.5606	-0.038	0.2166	-0.4759	-0.488	0.03	-0.173	-0.1861	0.0384	-0.7394	0.1609	-1.0649	-0.3865	-0.6304	-0.5713	-0.5023	-0.725	-0.963	-0.3419	-0.0801
SLC29A2	-0.9686	-0.5929	-0.7661	-1.3585	-1.4422	-1.3884	-0.8237	-1.1976	-0.3383	-0.852	-0.4422	-0.2092	-0.3659	-0.8262	-0.9269	-0.243	-1.304	-0.4325	-0.8943	-1.5649	-0.7274	-1.0954	-0.1234	-0.6506	-1.3292	-1.0619	-1.3733	-0.3715	-1.0291	-1.2042	-0.8863	-1.0529	-0.3058	0.069	-1.6394	-0.2447	-0.2688	-1.0801	-0.9078	-0.5458	-1.0862	-1.2142	-1.5649	-0.7959	-0.5084	-0.6506	-1.1047	-1.8678	-1.1552
STT3A	-0.4131	0.189	0.3863	-0.1203	-0.7834	0.745	0.0412	-0.2092	0.2166	-0.4501	0	-0.016	-0.5249	-0.3808	-0.4759	-0.4305	-0.0923	0.1283	0.0468	-0.6148	-0.3383	-0.3328	-0.7442	-0.3548	0.3573	0.8992	-0.1763	0.2449	-0.662	-0.16	1.1538	-0.2706	0.0014	0.1283	0.3471	0.7502	0.0949	-0.5585	-0.243	0.0014	0.544	0.5321	0.4699	-0.3419	-0.3004	-0.3752	0.1243	-0.1552	-0.0786
YAP1	0.7407	1.168	1.0573	0.2738	0.6544	1.272	0.8592	0.6434	-0.0439	-0.2345	0.9404	0.6717	0.1519	0.3651	0.0243	0.2191	0.2881	0.4813	0.8139	0.8074	0.6987	0.0115	-0.0029	0.4016	0.4319	0.1257	0.9501	1.0029	-0.2159	0.3561	0.987	0.8631	0.7137	0.8875	0.3403	1.0942	0.5059	0.4584	0.6022	-0.0277	0.516	0.7303	0.8359	0.7066	0.5251	0.5221	0.9054	0.1814	0.1336
IL18	-0.0939	-0.5395	-0.1001	-0.7155	-0.9351	-2.0649	-0.1976	0.257	-1.1681	-0.3292	0.9298	-2.3884	-0.6827	-0.567	0.4233	-0.016	0.583	0.5685	-0.706	-0.7909	-0.5735	-0.9214	-4.2905	-0.1488	1.3431	-0.2533	1.2804	-0.1001	0.157	1.3561	1.4103	-1.2653	-0.1094	-0.7909	-0.4961	-0.3492	-1.0529	-1.9159	0.346	0.7681	0.8631	0.5685	0.913	0.844	-1.5105	0.451	0.0827	-0.6038	0.5211
ZBTB16	0.2654	2.8742	1.1237	0.9493	0.9321	1.1998	2.8488	2.8637	1.4212	2.2004	1.0759	-0.5564	2.3211	2.9833	3.1245	-0.0469	1.8793	0.5028	0.4468	1.9675	1.8639	0.8197	0.0854	1.8003	1.0697	-0.2515	1.0482	2.116	1.1237	2.6135	-1.1943	1.8588	3.0585	1.8856	2.8223	2.6076	1.6978	3.9345	1.2916	0.6572	1.2522	0.2265	1.326	1.7744	2.7086	1.1622	2.0339	0.8536	0.5311
TREH	NA	NA	NA	NA	1.1648	NA	0.1164	3.0946	NA	NA	1.6978	NA	1.1821	0.2066	0.6397	1.8127	0.547	0.3448	0.1003	NA	NA	NA	NA	NA	NA	NA	NA	NA	NA	2.0032	NA	0.779	0.0014	NA	0.5489	0.3796	NA	0.5675	0.8327	2.9096	1.2624	-0.6643	0.184	NA	-0.458	NA	NA	NA	-0.0189
CHRM4	0.0718	NA	NA	-0.6215	NA	-0.0395	-0.7884	0.4967	-0.776	NA	NA	0.2054	-1.6038	0.2351	-1.035	0.4265	NA	-0.881	0.2079	0.0384	-0.9686	-0.9914	NA	NA	-0.1714	0.0718	NA	-0.5929	NA	NA	-0.4639	NA	-0.0145	NA	NA	-0.5628	0.5926	-0.6148	NA	-1.3733	NA	0.1827	0.08	NA	NA	1.2642	NA	NA	NA
SPA17	-0.7466	-0.0893	-0.191	-0.8573	0.5361	-2.1976	0.1545	-0.0203	0.8616	0.2314	-0.3902	-0.2567	0.0356	-0.7466	-0.1681	-0.0247	0.4834	-1.2515	1.2129	0.4308	-0.4112	-0.852	-1.0649	0.037	0.8213	0.9731	-0.1681	0.8303	-0.3752	-0.0203	-0.9574	0.7698	0.2702	-0.4074	0.2833	-0.3771	0.3103	0.6654	0.4854	-0.6506	-0.8468	1.2708	0.5221	0.4319	-1.3401	-0.4759	0.2928	0.8139	-0.1584
ROBO4	1.2636	0.7119	1.2636	1.2762	0.4668	0.8631	0.54	2.1332	1.0614	2.0353	1.4362	0.827	0.6681	0.6645	1.8131	0.5763	1.7442	0.4082	0.5361	1.1635	0.543	2.0912	-0.8084	1.5231	0.648	0.6654	0.517	0.648	1.6327	1.8707	-0.3004	0.2079	1.0022	1.2123	1.4787	1.5955	1.8176	1.3039	1.1519	0.3288	0.7866	1.0342	0.5341	2.0803	1.9877	1.2845	0.4404	0.8115	1.1104
EIF4G2	-0.4961	-0.816	-0.811	-1.035	-0.5146	-1.6484	-1.1844	-1.2076	-0.4699	-0.963	-0.949	-0.897	-0.9828	-1.5395	-1.2009	-2.3959	-0.4982	-1.1456	-1.3659	-1.3219	-0.6827	-0.9379	-1.3255	-0.9799	-1.1172	-0.9132	-1.1109	-1.152	-1.1297	-1.2898	-1.3183	-0.7155	-0.8997	-1.0087	-1.5735	-0.7809	-1.0321	-1.2176	-1.3511	-1.3659	-0.7784	-0.4501	-0.9132	-0.5929	-0.9856	-1.1329	-1.6304	-0.5353	-0.8678
TXNDC14	-1.0029	-0.4941	-0.7131	-1.3255	-1.2934	-0.6735	-1.1109	-1.0649	-0.417	-1.2076	-1.2109	-1.2688	-1.1016	-1.4941	-1.304	-1.5105	-0.9269	-0.9379	-1.415	-1.4344	-1.3328	-1.6484	-1.255	-1.4699	-0.5821	-1.1649	-1.1203	-1.3959	-1.3846	-1.1297	-0.5864	-1.4035	-1.4189	-1.7274	-0.9241	-1.3292	-1.191	-0.7418	-1.3401	-0.6038	-0.9686	-0.6873	-0.685	-0.4364	-0.8943	-0.2758	-0.7108	-1.077	-1.0679
ATP9B	0.8416	0.1043	0.1622	-0.3419	1.0335	-1.5395	0.3752	0.0468	0.4957	0.7163	0.4415	-0.1714	-0.1109	0.4936	0.6462	-0.5735	0.9884	0.2425	0.8576	0.7424	0.4027	0.5898	0.8836	0.9686	0.8172	0.229	1.3785	0.751	0.6257	0.6517	-0.7274	0.669	0.8953	1.412	-0.035	0.5221	0.2558	-0.2176	0.5028	1.6022	0.0538	0.9237	1.0573	-0.0514	-0.3328	0.2892	1.3482	0.1414	0.6508
MS4A5	NA	NA	NA	NA	NA	NA	NA	0.0949	NA	NA	NA	NA	NA	0.3796	0.6173	0.1699	NA	NA	NA	NA	NA	NA	NA	NA	NA	-0.6259	NA	NA	NA	NA	NA	-0.2092	-0.0072	NA	-0.016	NA	-0.6804	-1.6349	-0.5105	NA	-0.6215	-1.7084	-0.7131	NA	-1.0203	NA	NA	-0.1811	NA
VMD2	0.0342	-0.527	-0.5146	-0.3846	-0.7013	-0.9324	-0.6804	-1.0116	-0.7735	0.3185	-0.4131	-0.7834	-0.5886	-0.1959	0.7782	-1.454	0.1583	-0.0043	-0.3094	0.103	-0.4719	-0.0291	-1.1329	-0.2092	0.0072	-0.7686	-0.567	-0.7612	-0.1297	-0.0923	-0.2969	-0.7909	-0.8059	-2.191	-0.2243	-0.4055	0.0243	-0.6371	-0.6215	0.5792	-0.5166	-2.071	-0.3921	-0.5166	-0.816	0.0398	-3.5113	-0.527	0.5945
ROM1	0.3516	1.1966	0.8899	0.7485	0.7596	0.257	0.8734	0.0745	0.9252	1.113	1.4335	-0.3094	0.7899	-0.1926	0.4678	0.2582	0.2054	-0.1392	1.4346	1.2437	2.0254	0.115	-0.4679	1.3208	0.8568	0.5811	-0.3752	1.4179	0.301	0.373	-0.2916	1.9328	1.1757	1.7066	1.0293	1.4	0.0895	0.7216	1.4276	0.1322	0.1003	0.852	0.9479	0.984	1.2904	0.3103	1.9069	0.4844	0.3068
HRASLS2	2.5026	-1.6943	-2.0649	-1.5522	-1.6712	-2.1456	-2.4422	1.8012	-0.1746	-1.0529	-2.2723	-1.9885	1.1043	0.4436	-0.6484	0.7883	1.6466	0.6987	-3.0116	0.0029	-1.5951	-1.9269	-3.0831	-0.5228	-1.1811	-1.8783	-1.5821	-1.0116	0.0813	0.7715	-0.6873	4.0312	-2.0893	2.2588	-0.2142	-0.6827	0.1296	-0.7108	0.5898	3.373	-1.4074	1.9191	-0.7588	-0.9187	-0.699	-0.8314	-0.7661	-0.5735	-2.0649
DKFZP564J0863	-0.4035	-1.3884	0.0468	-1.2758	-1.255	-0.3733	-1.816	-1.949	-0.1456	-1.8836	-2.1649	-0.6897	-0.8783	-1.6897	-1.3328	-2.1649	-0.8916	-0.4074	-1.2828	-1.2277	-1.4901	-1.9214	-1.191	-1.9214	-1.191	-1.038	-1.1714	-1.9714	-1.1078	0.0158	0.7459	0.148	-2.3004	-1.5864	-1.5907	-2.1203	-1.0439	-1.3997	-1.5437	-1.3364	-1.3364	-0.7909	-1.3219	-1.8573	-1.9885	-1.4982	-0.456	-0.5312	-1.0529
MRPL23	-0.6804	0.144	-1.1844	-0.9078	0.3334	-0.6259	-1.038	-0.4461	0.1137	-0.2243	-0.3865	-0.5146	-0.699	-0.7539	-0.5735	-0.482	-0.4131	-0.0574	-0.3752	-1.1552	0.1814	-0.7394	-1.1078	-0.1408	-0.2934	-1.191	-0.4247	-0.5353	-0.5756	0.0086	-0.3474	-0.035	-0.1976	0.514	-1.1016	-0.3255	-0.4779	-0.4422	-0.1361	0.6239	-0.1203	-0.3846	-0.5543	-0.5778	-0.3364	-1.1266	0.5984	-0.527	-0.6943
PGDS	2.3239	2.7976	1.4217	-0.3094	0.4605	-0.6371	1.6267	1.5484	1.6857	2.4284	3.0213	-2.3511	0.2963	-0.1943	3.7301	-0.0604	2.0115	-0.3997	3.3491	3.0561	1.8428	-0.3511	-2.5649	2.8024	2.7141	0.7858	0.4027	2.6853	1.1342	1.6168	1.6107	0.3785	2.7643	1.6471	3.0286	2.4759	2.7693	1.058	2.1023	-1.3622	1.8914	0.959	3.3964	2.3766	1.57	2.4386	0.263	2.6622	3.2599
ILK	-0.1993	-0.1376	-0.173	-0.7735	-0.3884	-1.041	-1.3511	-0.7179	0.4168	-0.7346	-0.7202	-0.6689	-0.5692	-1.0203	-0.6873	-1.3004	-0.1993	-0.4521	-1.2345	-0.5291	-0.3219	-0.811	-1.6439	-0.7588	-0.9574	-1.1392	-0.816	-1.2688	-0.8863	-0.1488	-1.0233	-0.9159	-0.6349	-1.5649	-0.9024	-0.8009	-0.0218	-1.0893	-1.1266	-0.8599	-1.1617	-0.816	-0.6349	-0.3273	-0.2413	-1.0087	-1.1203	-0.852	-1.0087
ASCL2	-0.1665	-0.1392	-1.3659	-0.5437	-0.1016	-0.1811	-0.6643	0.2079	-2.1203	-1.4501	-0.2758	-0.725	-0.6371	-0.1392	0.1017	1.2228	-1.0029	-1.0174	-0.7226	-1.6943	-0.2515	-0.2345	0.2881	-1.5437	-2.0831	-0.3511	-0.9159	-0.685	-1.5353	-1.2653	-0.6148	-0.4779	-0.8678	-0.5649	-0.4383	-1.1681	-0.3111	-1.5564	-0.5166	-0.8288	-0.5064	-1.2863	-1.0203	-0.4016	-0.8314	-0.5778	-0.7274	0.2314	-1.662
OR51G1	NA	NA	NA	-0.0454	NA	0.1596	0.4542	0.1164	0.1814	-0.4074	NA	-0.0831	0.1454	0.4168	0.9199	0.1903	0.543	NA	NA	NA	NA	-2.3511	NA	NA	NA	0.0468	NA	NA	NA	-0.0831	-0.0058	NA	0.0014	NA	NA	-0.7202	-0.685	NA	0.7355	0.9775	0.5008	NA	0.622	NA	NA	0.5597	0.5341	-1.1811	NA
CAT	0.8536	1.1641	0.7832	1.1349	2.5707	0.5859	1.6951	1.4505	1.082	1.9579	2.5286	0.5801	1.148	0.8781	2.2048	-0.125	1.5588	1.6897	1.9579	1.3863	1.0475	0.6535	-1.1297	2.4433	1.0594	1.4662	1.3668	2.5348	0.8953	2.3485	0.3022	1.6327	2.6631	1.8906	1.6776	2.0183	0.8319	1.206	1.7983	1.2618	2.4265	0.9283	1.6452	1.1667	1.7937	0.7373	1.4782	1.3161	1.94
SCUBE2	4.382	0.6388	5.5844	2.0193	3.1991	NA	5.0264	3.5286	4.7038	3.3771	3.7666	5.7647	6.143	2.7069	1.7832	2.0032	3.1493	3.6462	2.2129	4.8605	3.6241	1.1808	3.0369	5.3252	2.9203	3.4101	4.4581	5.8736	3.5223	4.7506	2.9616	-0.9379	4.8997	-0.5821	3.2585	5.723	4.7829	3.7793	5.0193	0.6672	3.0407	2.1362	2.2943	3.1554	5.3089	1.1104	1.4174	2.5816	3.4209
TFDP3	-2.5228	-2.5395	-3.4266	-2.1584	-3.2653	-0.0862	-3.772	-3.4949	-0.2758	-3.0589	-3.1203	-0.7686	-2.035	-2.7084	-2.6259	-1.9051	-1.699	-1.5735	-5.2653	-4.2461	-2.1844	-3.0954	-4.3688	-2.7859	-1.8997	-3.8741	-2.7466	-2.9214	-2.6439	-2.6259	-3.7389	-2.3808	-2.9658	-2.4422	-3.6313	-2.7661	-2.8997	-3.1456	-3.5113	-2.2723	-2.3585	-1.2481	-3.6584	-3.1203	-3.5838	-1.4901	-2.7466	-3.071	-4.3778
CENTD2	0.7587	0.384	0.3334	0.5724	0.2833	0.3674	1.0391	0.2004	0.2869	0.8359	0.7294	0.4383	0.8327	0.6229	1.4415	0.3254	0.688	0.7321	0.8766	0.5568	0.111	0.9568	-0.2793	0.7277	0.9023	-0.2758	0.6248	0.5888	0.3852	0.5714	0.123	0.3414	0.8213	0.5878	1.0335	0.9419	0.8813	0.513	0.5211	0.8448	1.2479	0.346	1.168	0.6211	0.4834	1.6955	0.3984	0.8883	1.0307
CAPN5	-0.0544	-0.3058	-0.2898	-0.2311	-0.4639	-0.4266	-0.3752	0.726	-0.1894	-0.7084	-0.2793	0.051	-0.5756	-0.4131	-0.4403	0.7093	-0.5973	-0.4286	-0.4461	-0.6597	-0.2653	-0.3058	-0.2706	-0.8468	-0.5842	-0.2009	-0.9462	-0.5886	-0.6394	0.4255	-0.4112	-0.3419	-0.7108	0.2892	-0.9743	-0.7588	-0.0484	-0.567	-0.5105	0.1827	-0.3846	-0.1993	-0.6326	-0.2671	-0.8237	0.269	-0.7298	-0.8494	-0.9771
THRSP	0.4093	0.6897	0.4688	-0.5228	NA	2.2848	1.3454	NA	0.7799	0.3068	0.3874	3.0435	NA	0.1283	-1.7037	NA	0.7398	1.8156	NA	-0.2602	NA	0.3357	NA	NA	NA	0.2642	NA	NA	0.4834	NA	2.082	NA	0.9701	-0.2413	NA	1.3505	0.0538	NA	NA	NA	-1.5564	0.4093	1.3629	0.6599	NA	1.9456	NA	NA	0.1596
ME3	-1.6082	-1.152	-2.4901	-2.1266	-3.2934	-1.7909	-1.6126	-1.7959	-1.7274	-1.4941	-2.2723	-2.1649	-1.9159	-2.4035	-1.6038	-1.7959	-1.1779	-2.114	-2.0954	-2.0291	-1.699	-1.2311	-1.9828	-2.2176	-0.9546	-2.3511	-3.6953	-2.7661	-2.2934	-1.5228	-0.4699	-0.8034	-2.114	-0.9885	-2.5395	-2.3076	-1.2723	-1.9942	-2.699	-3.0589	-2.4901	-1.6758	-2.8997	-1.8417	-1.6171	-1.6804	-0.8757	-2.2109	-2
GLI1	0.8221	0.1583	-1.9885	-0.0544	0.7858	-2.1779	0.3437	1.4515	-0.2653	0.4977	0.6942	0.1979	1.3791	1.2461	0.8953	1.2516	-0.4901	-0.811	-2.3884	1.669	-1.1488	0.2654	-0.7322	-0.3865	0.4447	0.7233	-0.6781	-2.1844	0.1903	0.8311	0.5558	-0.9686	-1.2828	-2.1584	0.8065	-0.0559	-0.2193	0.0854	-0.0559	0.7723	-0.4112	-0.6461	1.7307	0.275	1.0545	-0.949	-1.5864	-0.8443	2.6246
ETV6	1.5326	1.0193	0.7225	1.2302	0.4372	1.359	0.8718	0.4521	1.1017	0.5917	0.5311	1.2376	1.275	0.6304	0.7476	1.1878	0.4531	1.5965	0.6708	0.913	1.0996	1.2035	0.058	0.5251	0.545	0.6173	0.6772	0.3818	0.8584	0.8813	0.6508	1.2708	0.6978	0.3829	0.7128	0.4383	1.0328	0.9731	0.3718	1.2216	0.7502	0.1814	0.0841	0.24	0.6508	0.962	0.9479	0.4854	0.3311
ZNF84	-0.889	-0.6804	0.0286	0.263	-0.097	0.3173	-0.5228	-0.5332	-0.7179	-0.5543	-0.5628	-0.4719	-0.8237	-0.7131	-0.2863	-1.9942	-0.963	-0.2328	0.3068	-0.3111	-0.2602	-1.0529	0.8836	-0.4325	-0.5332	-0.0189	-0.3456	-0.394	-0.2379	-1.071	-1.6304	-0.5995	-0.6304	-0.1714	-0.1062	1.4931	-0.0908	0.6517	0.0215	-0.3771	0.5211	0.5656	-0.4719	-0.1504	-0.3603	-0.3921	0.0101	0.2277	0.0158
DGKA	0.4957	-0.1282	-0.4035	-0.2515	-1.114	0.0841	-0.8836	0.6978	1.0807	-0.221	-0.488	-0.4961	0.0314	1.1017	-0.6943	2.0065	0.148	0.394	-1.5228	-0.4901	0.451	-0.1016	-0.9914	-0.2243	0.2987	-1.3696	-0.2828	-1.3147	0.4179	1.4489	-1.0831	-0.2969	-0.2109	-0.1617	0.2191	0.4179	-0.1203	-0.4501	-0.2934	0.0058	-0.1376	-0.1047	-1.7809	-0.5756	0.4158	0.8156	-0.0087	-1.4699	-1
EIF2B1	-1.0029	-0.8494	-1.0529	-1.2277	-1.2653	-0.7612	-0.8678	-0.8494	-0.5416	-1.0145	-0.692	-0.8678	-0.9799	-1.2009	-0.7809	-1.3255	-1.0469	-0.881	-0.6873	-0.963	-0.7784	-1.2758	-0.3292	-0.7515	-0.9971	-1.1746	-0.5395	-0.8314	-0.9771	-0.8391	-0.1828	-1.5146	-0.484	-0.6171	-0.771	-1.152	-0.4779	-0.488	-0.9351	-0.6712	-0.2009	-0.6326	-0.7346	-0.4325	-0.7084	-0.8009	-0.816	-0.8704	-1.038
MGC16384	0.4394	0.852	1.1991	0.518	-1.462	-1.6349	1.117	0.1097	0.3796	0.5568	0.3584	-0.2987	0.111	1.8444	-0.4266	-0.1156	-1.1203	0.5558	-0.725	-1.2653	1.7198	0.5028	0.6526	-0.0939	0.9161	-1.1266	0.2845	-1.415	-0.0454	1.6281	-0.2584	-0.8678	0.2928	0.9419	-0.1993	-0.9971	1.1596	-1.685	-0.4228	1.2406	0.6415	-1.1649	-1.5437	0.6951	0.6443	-1.0321	-1.4461	-0.8836	1.0286
THAP2	-1.2109	-1.077	-0.4719	2.3423	0.7664	0.6452	0.5763	-1.1779	-0.4383	-0.897	-0.4189	0.2666	2.4816	-0.0574	-0.881	-1.7661	-1.3328	-0.8468	0.3505	-0.7226	-0.7834	-0.873	-1.771	-0.5187	-1.7909	-0.8084	-0.2243	-0.486	-0.1633	-1.5395	-0.7637	0.0243	-0.8494	-0.4921	-1.0116	0.1878	-0.8339	-0.7563	-0.152	-0.2671	0.1003	0.0243	-0.5692	-0.0649	-1.0589	-0.6873	0.659	-0.3058	0.3196
CCT2	-2.0116	-2.0529	-0.8417	2.5654	-1.6038	-1.8009	-1.6304	-2.4739	-1.9434	-1.4982	-2.2934	-1.7563	3.1577	-1.2042	-1.8625	-1.7131	-1.7037	-1.462	-1.9269	-2.4035	-2.191	-1.949	-1.304	-1.6758	-1.7959	-1.7515	-0.9658	-1.8009	-1.5649	-2.2447	-0.6126	-1.5023	-2.0174	-1.3733	-2.0893	-1.2076	-1.7661	-1.9942	-1.811	-1.3733	-1.2379	-1.2863	-2.1779	-1.8943	-2.1456	2.2023	-1.1681	-1.7037	0.3288
MAP3K12	-0.5208	-0.725	-0.8494	-0.8314	-1.7226	-1.4074	-1.1877	-0.9574	-0.7202	-0.7394	-1.221	-1.3771	-0.7418	-0.3255	-0.771	-1.527	-0.5929	-1.2723	-1.0649	-1.2311	-1.5023	-0.7637	-0.4719	-1.3733	-1.221	-1.255	-2.3808	-1.2619	-0.9914	-0.7859	-2.482	-0.5125	-1.4383	-1.191	-0.8757	-1.0679	-0.1617	-1.7612	-1.3437	-0.8288	-0.9602	-1.7859	-0.9743	-0.816	-0.3219	-0.9379	-1.9269	-1.1329	-1.0116
HTRA3	3.4316	0.5965	3.359	1.6452	0.7621	1.6955	0.4287	0.6835	3.3219	1.119	0.8679	3.2216	1.9964	2.6875	1.7159	2.6769	2.2179	1.0165	2.8627	2.6276	0.2388	3.8924	-1.4739	1.0766	1.8416	2.6112	0.1137	0.5519	2.2869	0.9283	1.6763	-0.1329	0.9479	-1.0469	1.4131	2.0282	3.2426	-0.2934	-0.4901	1.5519	0.6173	2.1273	1.8895	2.9725	1.4	1.3403	2.7031	1.5321	2.4247
PTPN11	-0.5249	-0.2706	-0.038	-0.2277	0.3022	0.5331	-0.0664	-0.1219	-1.1844	-0.4639	0.24	0.0043	-0.4982	-0.3492	0.0454	1.2351	-0.6897	0.7966	0.6003	0.4425	-0.2881	-0.3401	1.0635	-0.5995	-1.4659	-0.0831	0.5917	0.9092	-0.3789	-0.9885	0.8631	-0.4481	-0.3183	0.2066	0.355	-0.6038	-0.1282	0.6517	0.0786	0.0482	0.315	0.2881	0.6462	-0.4093	-0.038	-0.8211	1.54	-0.3183	-0.3884
GRASP	0.037	-0.281	-0.5713	-0.1266	-0.1203	-1.527	-0.8757	0.3929	-1.1203	0.9015	0.119	-1.6126	-0.7346	0.7958	0.3092	-0.9771	-0.0831	-0.7612	-0.8783	0.3584	-1.3328	0.547	-1.6215	-0.0786	0.269	-0.5249	0.7502	-0.9885	0.3138	0.0072	-0.456	-0.7013	-0.5649	-1.462	1.7769	0.4584	0.5361	0.2461	0.2774	0.2154	-0.5146	-0.4035	0.9146	-0.1504	0.0398	-1.415	-0.8651	-0.7984	0.3707
K6IRS3	NA	NA	-0.7515	NA	NA	-1.4112	NA	-2.3004	NA	NA	-1.1681	NA	NA	-0.9105	NA	-1.4501	NA	NA	-1.4112	NA	NA	NA	-1.0499	NA	NA	NA	-1.1016	NA	NA	NA	NA	NA	-0.016	NA	NA	NA	NA	NA	NA	NA	NA	NA	NA	NA	NA	-1.074	NA	NA	NA
CMKLR1	5.5367	4.1747	3.4087	5.1235	4.3778	3.1011	4.6809	4.1375	1.9115	3.856	4.7511	2.8514	4.073	4.5154	6.517	3.7782	3.3813	5.1938	3.6565	4.9307	3.2088	3.4046	4.2861	3.1261	2.6958	3.61	5.4383	3.8924	4.7949	3.7126	4.7708	2.7405	3.5546	2.2175	5.8271	3.5993	3.8359	4.1522	4.009	4.9598	4.2987	4.3384	6.1171	3.7366	4.101	3.9203	1.9516	5.4748	5.5494
SLCO1B3	1.9042	-1.7274	-5.3104	-5.6082	-3.0831	-2.1203	3.1611	-3.8826	0.6526	-3.3306	-3.7447	-6.0493	0.4678	2.0827	-5.6367	3.3045	2.6886	-3.2109	-4.0256	-2.2584	-0.8339	2.692	-5.3929	-5.7642	0.9146	3.3377	3.6311	-5.4235	-5.939	-5.9568	2.0029	-4.9885	-4.3868	-5.4297	0.119	-3.851	-5.6224	-1.1488	-4.8406	0.9642	-6.1078	-0.0087	-3.8448	0.08	-4.8741	2.7327	5.8174	1.2437	-5.6878
TAS2R14	0.058	-1.2481	-0.9799	0.5907	0.0881	0.543	1.0086	0.5734	0.1177	-0.2636	-0.0634	0.1043	1.2079	0.6267	0.7832	1.3265	-0.2294	-0.3715	1.3098	1.4109	-0.2243	-0.1001	1.4615	-1.3585	0.1124	0.3718	0.355	-0.3383	1.3426	0.8049	0.6572	-0.9518	-0.1016	0.2845	0.0384	0.9054	0.6332	1.5241	-0.2092	-0.4074	0.4782	0.5291	-0.7155	-1.2413	0.4308	1.0072	-0.8391	-0.5228	-0.2793
WBP11	-0.4364	-0.963	-1.074	-0.8365	-0.9159	-0.5228	-0.8836	-1.2413	-0.8314	-1	-0.7515	-0.889	-0.6827	-0.963	-0.7108	-0.5312	-1.1681	0.08	-0.6897	-0.488	-0.9828	-1.2863	-0.7274	-1.2009	-0.9379	0.0854	0.4255	-0.692	-0.8288	-0.7612	-0.4679	-1.152	-1.0029	-1.2934	-0.3383	-0.7809	-0.7346	-0.364	-0.417	-0.5458	0.1124	-0.6781	-0.7131	-1.6484	-1.1943	-0.191	-0.1633	-0.7539	-0.484
PLCZ1	NA	NA	NA	NA	NA	NA	NA	NA	NA	NA	NA	NA	NA	NA	NA	NA	NA	NA	NA	NA	NA	NA	NA	NA	NA	NA	NA	NA	NA	NA	NA	NA	0.0115	-1.6215	NA	NA	NA	NA	-1.041	NA	NA	NA	NA	NA	NA	NA	NA	NA	NA
WDR51B	-0.488	-0.6552	0.0072	-0.699	-0.2934	-1.2969	-0.9078	0.1467	-0.6897	-0.1926	-0.3585	-0.6016	-0.7322	-0.6148	-0.2464	0.3595	-0.8651	-0.4779	-0.281	-0.5821	-0.5291	-0.8916	0.1097	-0.5973	-0.8546	1.2969	0.3173	-0.144	-0.2916	-0.3201	-0.4403	0.1243	-0.3846	-0.5023	-0.4266	-1.3511	-0.6038	-0.5249	-0.097	1.2504	0.3115	0.0976	-0.4131	-0.897	-1.3696	-0.0786	1.708	-0.6104	-0.3346
VAMP1	-0.6461	-2.2653	-0.8391	-1.0321	-1.6126	-1.7515	-0.2277	-1.5228	-0.9406	-2.6804	-1.2688	-2.5479	-0.949	-0.484	-1.5821	-0.2567	-0.0574	-0.9942	-2.6712	-2.2723	-0.7612	-0.454	-1.2447	-2.0233	-1.0559	-0.9324	0.3288	-1.4266	-1.2176	-0.8704	-1.1392	-1.8997	-0.0695	-1.4035	-0.816	-2.2042	-1.8262	-1.9714	-0.8546	-0.852	-0.6897	-2.2311	-1.6215	-1.776	-2.0174	-1.0439	-1.2723	-1.1779	-1.5312
VWF	5.0751	5.4259	4.6129	5.5647	5.3363	3.9964	5.6602	5.9544	5.4205	5.7554	5.7015	4.6871	5.1305	5.8053	6	3.5801	5.3698	5.0742	5.3266	5.9141	4.7159	5.4604	4.04	5.4162	5.3248	5.0308	5.4712	5.4343	5.4189	5.3834	4.5248	4.3709	5.2675	5.2668	6.2028	5.2861	5.8755	5.9267	5.3565	4.6112	5.2468	5.5125	5.7227	5.8271	5.8364	5.0126	5.3359	5.3681	5.9359
CHPT1	-2.0469	-1.0862	-3.2243	-1.8417	-1.3474	-2.3292	-2.041	0.2351	-0.8573	-1.3147	-1.8365	-1.5735	-1.3959	-1.811	-1.5735	-1.3733	-1.462	-0.6148	-3.2515	-2.2447	-1.0262	-2.662	-0.071	-2.2109	-1.6349	-2.9214	-1.0087	-1.7466	-0.9714	1.1941	-1.3076	-1.0499	-1.3511	-1.6943	-1.2009	-2.3004	-2.0893	-3.5328	-1.074	-1.4305	-1.5864	-2.699	-2.2243	-1.2898	-1.4266	-3.2793	-2.5564	-2.4659	-1.5522
C12orf32	-1.5778	-2.1584	-1.6897	-2.1266	-2.0954	-1.6349	-2.7274	-2.2653	-1.7809	-2.3659	-2.0233	-1.5522	-1.3696	-2.3511	-2.191	-2	-2.077	-1.873	-1.9269	-2.4739	-2.1016	-2.5649	-1.8468	-2	-2.1649	-1.4189	-2.1584	-1.6529	-2.776	-1.9658	-1.873	-2.9214	-1.9105	-1.9885	-2.2584	-1.6529	-1.6439	-1.8783	-1.8211	-1.5778	-1.2311	-1.9942	-1.8365	-1.8943	-1.6943	-0.6304	-2.1456	-2.1584	-1.7515
AATK	2.7634	0.0129	0.4308	0.119	1.2247	-0.3346	2.8113	3.5509	0.5231	3.0878	4.1691	-0.7563	1.5375	2.2225	2.4314	5.2075	0.9336	0.5311	3.9736	1.2904	1.3277	3.0595	3.246	2.2095	1.0412	0.6906	2.3386	0.1953	1.5074	3.2406	0.3829	1.3679	3.4005	4.2365	1.7807	2.2684	0.8123	1.461	4.6177	0.537	3.5472	-0.3076	2.6846	2.5809	1.6955	1.858	2.5722	0.9657	1.8339
MVK	-1.4699	-1.2828	-0.8757	-2	-1.4112	-1.4982	-1.6943	-1.5692	-1.5228	-0.881	-1.0862	-1.737	-1.2277	-2.0469	-1.5778	-0.5146	-1.458	-1.0233	-0.7909	-1.6712	-1.4035	-1.9602	-1.2515	-0.7661	-1.0649	-2.0589	-1.737	-1.0649	-1.5522	-1.4739	-1.9602	-1.1297	-0.6237	-0.6016	-1.4383	-1.6666	-1.3511	-1.5479	-1.2584	-0.0544	-0.9241	-1.2863	-1.3846	-0.4921	-1.2723	-1.3659	-1.3511	-2.1779	-2.1078
GPR89A	-0.9856	-0.6148	0.2857	-0.071	-0.3183	-0.9799	-1.3622	-0.5995	0.189	-0.7298	-1.6171	-0.4779	-1.221	-1.1649	-1.5864	-0.8997	-0.5332	-0.8468	-1.5187	-1.4699	-1.077	-0.5458	-0.8034	-0.3419	-0.4759	-0.5973	-0.7202	-0.6038	-0.7013	-0.4131	-0.6804	-0.9051	-0.7612	-0.7108	-1.1234	-0.5166	-0.6148	-0.3677	-0.852	-0.3677	-0.4383	-0.454	-1.0203	-0.1282	-0.3511	-0.2159	-0.3004	-0.4779	-0.749
TMEM116	-0.9658	0.4383	0.3403	-0.0619	2.2138	-0.3004	-0.3292	-0.2243	1.9601	0.1852	1.473	0.1725	-0.4779	-0.5353	0.1388	-1.4035	-0.0425	0.229	-0.0087	-0.1408	0.0328	-0.7661	-0.0336	1.5405	-0.0058	-0.5606	-0.484	1.4834	0.0813	0.24	-0.749	-0.144	1.0614	1.3016	0.2079	0.4082	-0.1001	0.4027	0.584	0.1545	1.5969	0.6572	0.8828	0.6871	0.7706	-0.5907	-0.7563	-0.0087	-0.3622
COQ5	-1	-0.776	-0.6689	-1.0831	-0.6082	-0.9187	-1.114	-0.8678	-0.5649	-1.1811	-0.6666	-0.8625	-0.8573	-0.9324	-0.725	-0.6758	-0.7784	-0.4982	-0.2951	-1.035	-0.7202	-1.3292	-0.6416	-0.606	-0.8009	-1.816	-0.9914	-0.8494	-1.0174	-0.7442	-1.2934	-1.2515	-0.2934	-0.7637	-0.9885	-1.1877	-0.5606	-1.041	-0.9971	-0.0649	-0.6237	-0.5023	-1.2584	-0.1926	-0.9324	-0.8625	-1.1877	-1.1203	-0.8417
ATF1	-0.8783	-0.3004	-0.4461	-0.8704	-0.4961	0.0172	-1.1234	-0.417	0.2702	-0.48	-0.1219	-0.6666	-1.3004	-0.2396	-1.1779	-1.074	-0.1861	0.1336	-0.6215	-0.8573	-0.2653	-0.6171	-0.2619	-0.1156	0.0663	-0.0847	0.5548	-0.6104	-0.9159	-0.1156	-0.3884	-0.9351	-0.4901	-0.7784	-1.0233	-0.2828	-0.8059	-0.5692	-0.6461	0.1738	0.0976	-0.9159	-0.6461	-0.4208	-1.2584	-0.6712	-0.1313	-1.1172	-0.3201
PDZRN4	-1.5735	0.84	3.4607	-0.6304	-1.4699	-2.0529	0.4552	-0.6689	0.4875	0.751	NA	-1.2413	1.4916	-0.685	1.9084	2.3437	0.9855	-0.2481	1.3951	2.8166	-0.852	1.9366	1.5922	NA	-0.4921	2.8558	NA	NA	0.8424	1.4967	NA	-0.243	0.0014	NA	2.1941	-0.3884	1.4605	-0.6394	0.148	-1.9214	-0.4639	0.6745	1.3567	0.0426	-1.1361	-1.9269	-1.3997	-0.9132	-0.4501
CCDC59	-1.0801	-1.0559	-0.3183	-0.7539	-0.7298	-0.7418	-0.8468	-0.8757	-0.8625	-0.3419	-0.7539	-0.7226	-1.0559	-0.9406	-0.8573	-0.7735	-1.4112	0.0101	-0.5228	-0.9714	-0.9714	-0.9462	0.0286	-0.5458	-0.7859	0.1712	0.2654	-0.4325	-0.3346	-1.035	-0.1001	-0.6873	-0.6394	-0.6735	-0.3865	-0.9406	-0.7226	-0.3808	-0.3789	0.2029	0.1789	-0.3752	-0.7418	-0.6439	-1.038	-0.417	-0.1376	-0.737	-0.5374
GPRC5D	-0.6781	0.4016	0.4425	NA	NA	0.0745	0.2129	2.0915	-0.4461	0.123	0.4865	NA	0.3219	0.976	NA	1.5563	NA	0.3618	0.541	NA	NA	0.0229	0.2388	NA	NA	0.346	NA	NA	-0.3437	1.224	NA	-0.2706	0.0072	0.6645	0.1953	0.544	0.8456	0.4823	NA	NA	0.4179	0.0949	NA	NA	NA	0.6295	NA	NA	NA
FGF6	-1.3328	NA	NA	NA	NA	NA	NA	NA	NA	NA	NA	NA	NA	NA	NA	NA	NA	NA	NA	NA	-2.4344	NA	NA	NA	NA	NA	NA	0.111	NA	NA	NA	NA	0	-0.7539	NA	-2.3511	NA	NA	NA	NA	NA	NA	NA	NA	NA	NA	NA	NA	-0.6484
MDM1	2.4003	0.144	0.2461	2.8084	-0.3401	0.4678	0.965	-0.3456	-0.1779	-1.458	0.4005	0.4265	4.0426	1.6448	-0.811	0.2339	3.7247	0.433	0.5984	0.2339	0.1097	-2.035	-1.3622	-0.6943	-0.5479	-0.1926	1.0321	-0.3846	-0.4442	0.4844	-0.1861	-1.2619	-0.0544	0.7102	0.3022	-0.7984	0.3907	0.1674	0.3127	0.3573	-0.144	-0.6237	0.7338	-0.6259	-0.5995	2.2606	-0.8546	-1.2379	0.9782
DIP13B	-0.9602	-1.0058	-0.2126	-1.074	-0.749	-1.4659	-1.889	-0.1125	-0.8135	-0.6781	-1.0439	-0.6506	-2.2311	-0.7322	-0.6326	0.2166	-0.5125	0.7251	-0.5564	-0.8391	-1.1617	-0.462	-1.4266	-0.6597	0.2881	-1.4228	0.7381	-1.5522	-0.6461	0.2522	-0.737	-0.3978	-0.5312	-1.4901	-0.7784	-1.5821	-1.4228	-0.5312	-1.2828	-0.3328	-0.6552	-0.9546	-0.7346	-1.5187	-1.1329	-1.7809	-0.7909	-1.1811	-0.5353
EPSTI1	3.4114	1.0151	0.9138	3.1723	1.281	3.0067	1.7651	2.848	2.3654	2.2333	1.0144	2.6283	2.6717	2.3411	2.5298	4.3916	1.9866	3.433	0.886	2.6455	0.7587	1.5023	-0.4286	0.3752	3.0954	2.497	3.4182	0.8294	3.6299	3.5765	2.9944	0.4136	0.1953	0.4394	1.3115	0.1941	2.754	1.6276	1.918	5.1534	2.4898	3.3854	2.5838	1.766	0.7816	2.5617	-0.0189	2.0093	2.4033
FGF9	-2.3511	-1.2653	0.5588	-0.3696	0.0229	-1.4074	0.1674	-0.3959	2.0363	0.4222	2.9115	-1.8009	0.8742	-0.1943	-0.7202	-1.8783	-1.3219	-2.8997	1.6915	1.7999	1.9153	-1.3585	2.12	1.9664	0.4351	1.4103	0.0286	1.3951	-1.2934	-1.1047	1.5266	2.2729	2.8594	2.5926	1.232	1.7	-1.2934	-1.1392	-0.5692	-1.415	-1.7226	-1.889	2.3618	1.2302	2.5398	0.6154	-2.5064	-1.1681	0.1545
BIVM	-1.2447	-1.0619	-1.6529	-1.482	-0.9771	-1.662	-1.6171	-1.1552	-0.191	-1.2243	-1.0291	-0.685	-2.2723	-1.3292	-1.6574	-1.0985	-0.8084	-2.2934	-1.5353	-1.4305	-0.8943	-1.0619	-2.8678	-1.1361	-1.2619	-1.5649	-1.6666	-0.737	-2.3219	-0.8391	-1.7084	-1.0174	-0.7984	-0.9187	-1.1203	-0.776	-1.5821	-2.6529	-1.0291	-0.8783	-1.0589	-0.6827	-0.7298	-1.0499	-0.662	-0.6259	-1.9602	-1.2176	-0.7179
LOC283537	1.5281	2.0036	-0.0514	0.184	0.229	-0.9051	0.5059	1.0158	0.7364	1.696	2.2119	-0.9942	-0.0203	0.6554	2.4926	1.159	2.0912	2.6549	2.0587	0.0676	1.206	-0.1976	-2.3959	1.7446	2.0388	0.4936	1.26	1.24	1.5356	1.583	1.06	3.2633	0.8687	2.079	2.0952	0.9268	1.3752	0.4615	1.9422	1.8631	1.8809	0.7587	2.9009	1.5064	2.1421	-0.7131	1.7778	-0.486	1.8984
FRY	2.1994	3.3291	2.6264	2.2951	2.6551	3.5886	2.8383	4.1177	2.224	3.314	2.5263	2.1372	3.1349	3.3377	2.8254	1.2191	2.1385	2.6309	2.657	3.7803	4.359	3.247	2.7619	3.9001	2.5331	3.1912	2.9432	2.9443	2.7268	3.5185	1.4217	3.1598	4.0108	4.1795	3.279	3.8094	2.9694	2.7196	2.9884	1.7626	2.2705	2.2969	4.4989	2.2113	2.9902	0.7128	3.437	2.9413	2.9214
TRPC4	1.1596	-0.1172	-0.9462	0.9077	-0.7661	0.3752	-0.2226	0.33	1.2461	0.0731	-0.3715	0.0426	-0.1714	1.5435	-0.1811	0.809	1.5864	-1.3659	-1.0954	0.1699	-0.6506	2.8701	-0.6171	NA	-0.7984	-0.5187	-1.0619	-0.1047	0.7562	1.2382	1.2833	-1.3255	-1.3884	-1.9105	NA	-1.4266	0.3829	0.2363	1.0398	-0.1959	-0.4325	0.7381	1.0854	-0.1584	-0.725	-0.2636	1.8065	0.6116	0.7519
LOC387911	NA	5.0687	1.1124	NA	1.4668	NA	NA	NA	0.5869	0.5646	NA	NA	NA	NA	NA	NA	NA	0.7519	NA	NA	NA	NA	NA	NA	0.856	NA	NA	NA	NA	NA	NA	NA	-0.016	NA	NA	3.294	NA	NA	NA	NA	0.08	NA	NA	NA	1.2963	NA	0.9694	NA	NA
METRNL	1.0718	0.3068	1.0559	0.6332	-0.852	-0.3585	0.4688	0.5301	-0.0395	1.0433	-0.3401	0.1801	0.7004	0.5241	1.4756	1.5797	1.2732	1.0779	-0.4286	1.0186	0.3403	1.4962	0.5869	0.5993	1.189	0.3403	0.622	0.1493	0.6617	0.6462	-0.2026	0.364	0.1941	-0.7588	1.1421	0.3505	1.3144	0.8867	0.2642	1.7916	-0.4364	0.0841	0.7022	0.959	0.4404	-0.2092	0.7493	1.0922	0.9942
DIO3	2.157	0.8416	1.7342	0.7824	-0.484	-0.6643	1.8492	1.4378	2.0321	1.9837	-0.2916	1.2726	2.3584	0.1622	2.0147	2.6116	1.3807	0.0342	1.1223	2.5957	1.1903	0.6572	-1.3437	1.1057	2.2684	2.8858	-0.0649	1.6012	0.606	0.7233	1.7924	-1.0679	1.111	0.8392	2.8452	2.2004	0.2041	-0.2898	-0.5416	2.4249	-0.2447	0.4699	1.1635	1.4399	1.3623	-1.8009	-0.5973	1.8115	0.6434
ACTN1	-0.1926	-1.1109	0.364	-0.6529	-1.1016	-0.417	-1.2413	-1.0321	-0.3696	-1.0831	-1.5105	0.7604	-0.685	-0.8863	-0.7155	-0.3346	-0.013	-1.2042	-1.2379	-0.5146	-1.7661	-0.9658	-1.0145	-1.7131	-0.7155	-0.7322	-2.3147	-1.873	-1.4422	-0.6758	-0.5821	-0.9771	-1.685	-1.7274	-1.4383	-1.7661	0.0072	-1.7037	-1.7661	-1.3474	-1.3219	0.0115	-1.0649	-0.897	-0.9518	-1.3846	-1.7859	-0.881	-0.1877
AK7	-1.7466	-0.8997	-3.2243	-1.4501	1.3623	-2.3364	-0.5084	-2.4422	0.9605	0.7941	-2.2109	-1.852	0.2079	-2.1016	-2.0174	0.3674	0.2191	0.5917	0.1686	-1.482	-2.035	-1.5437	-0.077	0.1648	1.8679	-3.61	-3.4112	-2.071	-0.3865	-0.1109	-0.5146	1.2726	-0.4093	-0.221	0.2104	-1.1172	-0.488	0.1852	-2.1329	-0.3364	-2.6804	1.2957	-1.5105	0.5221	-0.963	-2.2176	-2.071	1.8895	-1.7418
SERPINA11	-0.7394	NA	-1.6804	NA	NA	-0.9714	NA	-1.1844	NA	NA	NA	NA	NA	-2.0649	NA	NA	NA	NA	NA	-1.3659	NA	NA	NA	NA	-0.9187	NA	NA	NA	NA	NA	-0.5332	NA	NA	NA	-1.2413	-1.6804	-0.6082	NA	NA	-1.6038	NA	NA	NA	NA	-0.8863	NA	NA	-1.0233	NA
USP33	-1.0262	-1.071	-0.1125	-1.1943	-0.1504	-0.1779	-0.6461	-0.5458	0.7031	0.3471	-0.3201	-0.3383	-0.9799	-1.2653	-1.2076	-1.3771	0.6681	-0.3273	-0.8288	-1.1234	-0.2723	-0.4719	-1.482	0.4647	0.6627	-0.1219	0.0718	-0.0985	-0.415	0.809	-0.7155	0.5211	0.0496	-0.304	-0.7661	-0.0218	-0.7179	-1.041	0.364	0.1043	0.2314	-0.6758	-0.5374	-1.0893	-0.7322	-0.1456	-1.1172	-0.6712	-0.304
NFKBIA	1.4558	1.384	2.0342	1.113	2.0426	3.1588	0.544	0.8899	0.86	1.5094	0.9396	2.7398	1.7416	1.934	1.0759	-0.4208	0.269	2.8655	0.0718	1.5806	1.6893	1.5758	0.6434	1.9486	1.1037	1.8303	2.025	0.7207	2.5023	0.9862	3.1303	1.3254	0.8576	0.5878	1.9096	1.6383	2.6633	2.1897	1.7761	2.0837	1.6902	1.113	1.7286	1.0179	1.3929	2.1988	3.0423	0.6369	1.6969
PRKD1	0.0014	0.6257	1.3573	0.2916	1.4484	-0.3715	0.7233	-0.8836	0.9804	0.6229	0.3918	1.7	1.1966	0.4147	0.1454	-0.9602	-0.1016	-0.0365	0.3471	1.6517	0.2166	0.5519	-3.3808	0.7493	0.4823	0.6599	-1.0831	1.8592	-0.0306	-0.4035	0.0029	0.6853	1.9119	-0.1877	0.2928	1.6736	1.08	-0.4659	0.4436	-0.4266	-0.1203	0.4657	0.6717	0.9023	1.766	-0.2142	-0.7108	-0.1943	0.9949
JAG2	-0.7037	-2.3364	-0.685	-0.8997	-1.685	-2.1779	-1.5649	-1.5522	-0.8546	-1.0831	-1.458	-1.7563	-0.3622	-0.6104	-1.6171	-0.5564	-0.685	-2.1078	-0.5907	-1.7515	-0.6712	-0.4035	-0.0306	-1.3921	-1.1943	-0.5692	-1.0499	-1.1877	-0.949	-0.8943	-0.6781	-0.9743	-1.3696	0.9456	-1.5778	-1.2413	-0.5228	-1.889	0.4823	-0.9518	-1.4659	-0.3437	-1.0559	-1.1976	-0.6082	1.1871	-1.0954	-1.7809	-0.8391
CMTM5	-1.737	-1.685	-1.2653	-1.114	-1.8625	-1.699	-2.071	-0.8916	-2.1016	-0.9132	-1.1779	-1.5995	-1.6171	-1.1456	-0.8211	-0.6282	-2.2243	-1.5951	-1.5951	-1.5353	-2.3733	-1.6215	-1.3004	-1.8211	-1.3808	-1.3696	-1.2758	-1.9379	-0.8625	-0.8288	-2.1266	-1.9324	-1.2969	-2.4344	-1.074	-1.454	-0.9971	-1.4739	-1.9051	-1.8365	-1.1078	-2.191	-0.8546	-1.4982	-0.9574	-1.7809	-1.191	-1.3696	-0.8943
DAD1	-0.3165	-0.5187	-0.1078	-0.3659	0.2116	0.051	-0.8059	-0.7108	0.3196	-0.4403	-0.5064	0.4531	-0.1001	-0.5353	-0.5628	-0.3111	-0.1001	-0.6394	-0.662	-0.3846	-0.699	-0.2109	0.0868	-0.3622	-0.281	0.5627	-0.6304	-0.4016	-0.2828	0.037	0.2963	-0.2758	-0.3771	-1.1584	-0.8034	-0.5864	-0.3771	-0.7515	-0.6082	-0.4093	-0.7588	-0.1844	-0.7588	-0.3827	-0.4759	-0.4305	-0.7515	-0.1361	0.0029
RNASE7	0.5361	-0.8365	NA	0.2363	-2.041	0.7416	-0.1877	0.107	1.6159	0.175	1.1124	0.294	1.4875	0.0482	0.3674	0.9583	0.2998	-0.3884	0.2845	NA	0.8544	NA	1.2726	0.1674	-1.7274	0.3057	NA	NA	NA	0.2473	NA	0.2642	-0.2277	0.2582	0.3663	-0.1424	NA	1.7575	0.0243	-0.9434	1.6318	0.0328	1.1184	NA	-0.3237	0.3288	0.4854	NA	1.2744
AKAP5	-1.2142	NA	NA	NA	NA	NA	NA	-2.1584	-0.4521	NA	NA	NA	NA	NA	NA	NA	NA	-0.1926	-0.8288	NA	NA	NA	NA	NA	NA	-0.8599	-0.173	NA	NA	NA	NA	-0.4344	-0.0116	NA	NA	-1.9434	NA	-1.3959	NA	NA	NA	NA	NA	NA	NA	NA	NA	NA	NA
SIX6	-2.6712	-2.8059	-1.9714	0.6126	-2.7466	-2.3004	-2.3219	-3.4391	-3.3219	-3.4564	-3.1844	0.103	-3.7505	-2.5395	-1.454	-1.8365	-1.1392	-2.8262	-2.889	-2.9324	-2.2584	-2.8059	-2.1714	-1.9771	-3.3321	-2.4035	-2.5312	-2.4266	-1.8625	-2.2863	-2.3364	-0.2311	-1.6666	-1.2076	-1.2934	-3.5212	-2.4344	-2.7563	-1.0893	-2.889	-3.8448	-2.6171	-2.3364	-2.5479	-3	-1.9051	-0.255	-1.8314	-2.6349
KIAA0586	-0.5929	-0.5479	0.1712	-0.2898	0.107	0.6754	-0.0619	-0.2916	-0.1959	-0.725	-0.456	0.4594	-0.4016	-0.5084	-0.0604	-0.2243	-0.7809	0.157	0.3265	0.7198	-0.48	-0.2706	0.844	-0.5821	-0.3752	0.2678	-0.0247	-0.3715	0.45	-0.9462	1.0731	-0.3419	-0.6597	-0.6304	-0.1926	-0.4461	-0.041	0.0963	-0.1568	-0.9434	-0.2193	0.3505	0.0129	-0.6259	-0.038	0.037	-0.5374	0.0215	-0.2243
KTN1	0.1583	0.3448	0.7748	0.3707	0.9738	1.291	-0.1472	-0.0203	0.0594	0.1283	0.6608	0.6617	0.2833	0.2869	0.3918	-0.1763	0.0229	0.8115	0.5079	0.763	-0.0755	0.0635	0.9038	0.0813	-0.2969	1.0222	0.4865	0.4657	0.7049	0.127	1.6969	0.5241	0.5548	0.6462	0.355	0.5529	0.2179	0.4699	0.2702	-0.4501	0.2091	0.992	0.3357	0.4792	0.8016	0.115	0.4865	0.0086	0.4936
PDK1	0.2904	-0.0877	-0.7637	-0.9159	-1.4941	0.3685	-0.1078	-0.5864	-0.0058	-0.0985	-1.9828	0.0621	-0.8417	0.9479	-2.1456	-0.9574	-0.8391	0.6654	-3.3076	-2.4739	-0.7563	1.4478	-1.1078	-2.3147	-0.5458	0.0976	0.52	-2.0116	0.6351	-1.2076	1.5316	-0.2277	-1.2142	-0.2619	-1.3219	-1.2311	-0.9743	-3.035	-0.3165	0.275	-0.1681	-1.0203	-0.3401	-1.3474	-1.9546	-1.1811	-1.8468	-0.9546	-1.4422
ERO1L	1.0915	-0.5951	1.1725	0.1966	0.5489	2.639	-0.8339	-1.458	0.7485	-1.3292	-1.7322	1.8098	1.6323	-0.074	-0.1536	-1.2379	-0.4325	1.7229	-1.482	1.0272	0.8875	-0.1844	1.0222	-2.1584	1.0014	1.4573	-0.226	-1.041	0.3045	-0.5973	3.5311	1.26	-1.3183	0.107	-1.5907	-1.5437	0.069	-0.7959	0.1776	1.1827	-0.1156	2.1444	0.0257	-1.482	-0.749	0.4222	0.0101	0.9199	1.5049
L2HGDH	-1.9658	-1.9771	-0.889	-2.3808	-2.3659	-1.5778	-3.5064	-3.3335	-0.6529	-3.0831	-3.1078	-1.0262	-2.3437	-2.737	-3.0233	-3.3076	-1.8625	-1.5564	-2.3147	-3.0116	-1.816	-2.114	-1.5564	-2.6529	-1.482	-1.6484	-2.4982	-2.3884	-2.0529	-2.1266	-0.7661	-1.9434	-1.7131	-1.2447	-3.1329	-2.1266	-1.9051	-2.9105	-2.3004	-2.8678	-1.7084	-1.3219	-2.9546	-1.7909	-2.9546	-1.1779	-3.4787	-3.0831	-2.9105
C14orf106	0.9077	0.2302	0.7416	1.4351	0.7536	2.009	1.4885	0.6627	0.514	-0.5628	1.0711	1.0834	0.9199	1.4998	1.2821	1.0566	0.1738	1.9007	1.6911	1.7592	0.3161	0.4212	1.8906	-0.2916	-0.226	1.037	1.9362	1.278	1.364	-0.1219	1.9635	0.0482	0.774	1.2792	1.0996	0.4688	0.7958	1.6938	0.8805	0.2265	1.0888	1.3962	0.543	-0.0679	0.9214	0.3618	0.9115	1.0186	0.9169
PSEN1	-0.5291	-0.7539	-0.0514	-0.7735	-0.0029	0.0086	-1.152	-0.6394	0.4233	-0.9187	-0.8059	-0.1844	-0.255	-0.2602	-0.6758	-0.3884	0.1414	-0.2328	-0.3659	-0.1234	-0.5799	-0.5002	0.5548	-0.6304	-0.1894	-0.5146	0.0186	-1.0679	-0.6689	0.3763	-0.3165	-0.0877	-0.5778	-0.5995	-0.749	-0.4189	-0.3978	-0.3622	-0.8943	-0.3511	-0.7515	-0.5125	-0.9159	-0.3111	0.0976	-0.035	-0.48	-1.3846	-0.5374
FOS	4.712	6.0032	4.934	5.5868	4.7766	2.5821	5.4617	5.804	5.2828	5.3523	5.9873	4.6651	4.9556	5.9479	5.1823	3.1739	4.6194	2.9475	4.3903	4.8659	5.5043	3.9809	3.8001	6.015	4.9509	4.6381	5.0635	5.7244	5.111	5.488	2.9587	6.0314	5.6029	4.6769	5.6545	5.7255	5.8777	5.753	4.8807	3.8728	3.3688	4.847	5.5601	5.511	5.6525	3.0856	4.1867	4.4744	4.7538
GSTZ1	-0.4016	-0.5756	-0.304	-1.1172	0.1003	0.3674	-1.2413	-1.6304	-0.5929	-1.0233	-0.4921	0.0043	0.0115	-1.0893	-0.8443	-1.3696	-0.6735	-0.1763	-0.6349	-0.456	-0.9686	-0.5756	0.6378	-1.3474	-0.4344	0.7874	-2.3659	-0.4422	-1.889	-0.331	-1.4035	-1.1844	-0.725	-0.0425	-1.5907	-0.1536	-0.2916	-0.9324	-1.1746	-1.2828	-0.9828	-0.3111	-0.1811	-0.0365	0.1336	-0.7959	-2.5064	-0.852	-0.6712
CHMP4A	-0.2898	0.394	0.2594	-0.2916	0.384	-0.3959	-0.7037	-0.6371	0.8448	0.0704	-0.462	0.539	0.0186	-0.2567	-0.1714	-1.0985	0.0976	-0.3094	-1.2619	0.1296	0.5945	-0.0619	-0.3566	-0.3076	0.6323	-0.3004	-0.6781	-0.3808	-0.1392	0.648	-0.3058	-0.1552	0.0201	-0.4093	-0.0786	-0.281	0.1243	-0.1877	-0.4247	0.0936	-0.1697	0.2388	-0.2277	0.2714	0.2191	0.3752	-0.3273	-0.4961	-0.2379
PRO1768	-0.4131	NA	NA	NA	NA	NA	NA	NA	NA	NA	NA	NA	NA	NA	NA	0.2141	NA	-0.2396	NA	NA	NA	-0.0189	NA	NA	NA	NA	NA	NA	NA	NA	NA	NA	-0.0101	NA	NA	NA	NA	NA	NA	NA	NA	NA	NA	NA	NA	NA	NA	NA	NA
TRIP11	0.4394	0.1349	0.7933	-0.0559	1.2418	0.8883	-0.2345	-0.1504	0.5221	0.3896	0.2302	1.1622	0.1941	0.394	0.0621	-0.4055	2.4257	1.6599	0.3516	1.1375	0.6003	1.0136	1.0621	0.4383	0.6708	0.3277	0.1519	0.6996	0.6581	-0.1361	0.7672	1.3578	-0.1125	0.3951	0.2437	0.5878	0.5878	0.2351	0.4615	0.1699	0.4792	1.1401	0.696	0.2091	0.9942	0.2461	0.5685	0.8805	0.472
C14orf68	-0.1828	0.1583	-0.1681	-0.0862	-0.2396	0.0384	-0.0679	0.2522	-0.5585	-0.331	-0.3147	0.148	-0.0725	0.2473	0.364	0.6736	-0.2602	-0.1424	0.1953	-0.0559	-0.041	-0.2092	0.6164	0.3057	-0.7884	-0.1266	-0.5416	0.3663	-0.9856	-0.4901	-0.4481	-0.2567	-0.3529	0.1454	-0.4325	-0.0365	0.069	0.6107	0.2154	0.1991	-0.0877	-0.1681	-0.2294	-0.2328	-0.0425	0.0144	0.119	-0.2515	-0.2396
FLJ10038	-0.1266	-0.1584	-0.7346	-0.8997	-0.1993	0.0963	0.2845	-0.077	0.6012	0.3323	-0.1779	-1.0116	-0.9799	-0.2294	-0.1746	-0.5332	0.1243	0.0676	-1.074	0.0524	0.2582	0.3528	-1.1047	0.3785	0.037	-0.9885	-0.6439	-0.8651	-0.2176	0.7111	-1.2042	0.0356	0.6942	0.1648	0.1878	-0.2294	-0.7637	-0.776	-0.4055	-0.1763	-0.5929	-1.0619	-0.3255	-0.6126	-0.2109	-0.3733	-1.035	-0.9574	-0.7202
SERF2	0.8351	0.929	0.9575	1.3057	1.1349	0.6088	0.7613	1.2654	1.1795	0.929	1.2708	1.3646	0.6425	1.082	1.346	1.2485	1.0942	1.0363	0.5539	1	0.9935	1.441	0.6799	0.7596	0.9381	0.9833	0.8821	1.4813	0.9434	1.3863	1.0915	0.6563	0.9222	-0.0649	0.8123	1.4797	1.1329	0.8383	0.8914	1.4839	1.2702	1.4568	1.4076	0.992	1.0335	1.2412	0.7364	1.2786	1.3098
CPEB1	-1.8836	-3.035	-2.7859	-2.5564	-2.8783	-3.7065	-0.0589	-2.4501	-3.6638	-1.3959	-1.6349	-3.4771	-2.6804	-2.041	-1.1584	-2.5479	-2.8997	-2.9658	-2.7084	-1.6804	-3.3659	-1.8943	-2.6897	-2.5228	-2.3147	-2.0233	-1.4074	-0.6215	-1.816	-2.8059	-2.2447	-3.3763	-2.9324	-2.8997	-1.0589	-3.4235	-2.0893	-1.8625	-2.6349	-3.4204	-2.9434	-2.4739	-1.8314	-2.5146	-2.4344	-3.9127	-2.1584	-0.8237	0.3242
AQP9	6.2673	6.0538	6.595	7.5699	6.2034	5.4666	6.067	4.9112	4.7698	7.1548	4.6064	6.5925	5.0631	3.5993	8.0246	4.5311	6.5736	7.1558	6.7184	7.499	4.9212	6.068	3.8329	5.3466	5.4555	5.7233	5.5264	6.2363	4.7131	4.6781	6.7602	5.3663	4.6741	3.6622	4.8644	4.7586	6.6511	4.6467	5.7538	7.8536	6.8777	2.2339	6.7866	3.9165	4.6685	4.6668	6.671	7.3443	7.975
GOLGA	2.1875	1.6821	2.1322	1.4626	1.5898	-0.125	1.0058	0.7119	0.6489	1.6857	1.0683	0.1017	1.4936	2.6588	0.7084	1.6154	0.6397	0.8718	0.0922	0.9738	1.8448	3.4621	3.5311	1.4942	2.8303	-0.6038	1.5709	-1.0262	3.0365	2.2657	0.8742	1.4647	0.739	1.082	-0.0574	2.3182	1.3857	1.7022	-0.6237	1.9305	1.5205	-1.2969	-0.3566	1.1725	-0.9406	3.3547	0.7013	1.3829	0.704
SEMA7A	-0.1078	-2.5821	-0.7108	-0.6897	-2.8365	-0.5799	-1.2758	-0.8863	-0.3273	-0.949	-1.3808	-0.9971	-1.5522	0.2376	-0.1488	0.2363	0.3161	-0.3959	-1.6394	-0.0862	-2.2934	-0.0816	-1.1714	-3.2515	-0.7909	-1.3076	-0.243	-2.7466	-0.5799	0.1979	1.1342	-1.8314	-2.5479	-1.5951	-1.0145	-1.255	-0.331	-2.7563	-1.811	-0.3328	-0.2881	0.8899	-2.035	-2.3437	-2.1266	-1.3733	-1.8262	1.5539	0.2845
THAP10	-1.3733	-2.1714	-2.071	-2.2723	-1.7179	-0.7155	-1.527	-2.0174	-1.6394	-1.5228	-1.662	-0.7084	-1.1746	-2.9885	-1.6126	-0.9771	-1.6349	-0.6326	-1.6304	-1.4422	-1.2688	-3.0589	-1.9324	-1.3696	-2.4189	-2.9658	-0.486	-0.9324	-2.041	-2.6439	-2.9324	-1.6082	-1.5864	-1.7037	-1.8365	-2.0233	-2.1203	-2.2243	-2.3076	-1.7466	-1.1297	0.3696	-1.6126	-1.1488	-2.1392	-2.5735	-1.0923	-1.2379	-1.5995
ENPP7	0.058	-0.3846	1.0314	-0.3733	0.7841	0.1699	0.2339	-0.5064	-0.4442	-1.2243	-0.5084	0.4114	-0.1811	0.1941	0.2998	0.4626	-0.0203	-0.038	0.1322	1.0243	0.6415	-0.1031	0.119	1.2259	-1.2009	0.5059	-0.8494	0.6369	-0.3921	0.355	0.0976	0.1349	0.7723	1.4983	-0.1424	-0.749	-0.0203	0.3918	0.5772	0.2904	0.4383	0.7949	-0.3437	0.451	0.4813	0.3068	0.9336	0.9884	-0.3255
NDN	1.0363	1.7786	1.3533	1.4158	-0.4228	1.8359	1.648	0.648	0.8695	1.7242	1.4957	-0.1203	-0.4699	1.2696	1.3477	-0.0649	1.0963	-0.1844	-0.1811	0.7303	1.4998	2.225	-2.3364	1.7604	0.6462	1.7312	0.1097	1.719	0.9935	1.0272	1.6636	-1.5064	1.8984	1.0454	1.1263	1.7277	0.8139	-0.0029	0.2786	-0.5756	1.058	-0.0291	1.1667	1.858	0.3539	-0.6781	0.9978	-0.0306	1.4746
C15orf38	1.5064	1.5806	0.4678	0.6313	0.9169	1.5632	1.4526	0.9184	0.8246	0.8213	1.7303	1.0813	1.0621	0.4049	1.6187	1.3173	0.809	1.472	1.0264	1.5346	1.7744	0.856	1.3746	1.5602	0.5974	0.0072	0.1454	0.9138	0.3138	1.3173	0.0229	2.0014	1.792	0.364	0.8844	0.24	0.9804	0.8098	0.8953	1.3868	1.0356	1.1395	1.2827	0.9237	0.54	0.3696	0.8568	0.7119	1.1204
RCCD1	-0.7515	-1.685	-1.6038	-1.8468	-1.6484	-0.3566	-1.6082	-1.9828	-1.5821	-1.454	-1.2009	-1.1172	-1.1266	-1.486	-2.2109	-0.3622	-2.3585	0.1097	-1.6758	-1.8314	-0.8704	-0.9971	-0.6237	-1.0923	-1.2176	-2.0649	-1.6259	-1.9546	-1.482	-2.0649	-1.8997	-0.8573	-1.035	-0.0014	-2.3808	-0.7809	-1.8059	-2.5735	-1.7274	-0.456	-2.2723	-1.2243	-2.5395	-1.2934	-2.0469	-1.2619	-2.2042	-1.5312	-1.9159
OAZ2	-0.0321	-0.1568	-0.2793	-0.3437	0.2277	-0.5778	-0.097	-0.5125	0.0468	-0.1894	0.144	-0.4739	-0.7784	-0.331	-0.1345	-1.1617	0.3115	-0.6967	-0.16	-0.776	0.4308	-0.0469	-0.462	-0.1125	-0.3548	-0.9051	-1.6259	-0.1861	-0.6439	0.0272	-1.2828	-0.1552	0.4447	0.1725	-0.4247	0.1414	-0.1552	-1.1361	-0.8599	-0.889	-0.3921	-1.1047	0.0868	-0.0877	-0.456	0.1814	-1.2277	-0.5842	-0.7037
CYTL1	3.2875	1.3386	2.3912	1.5256	1.1506	1.7638	0.8711	1.1362	3.3547	4.3583	1.984	0.3208	0.5069	2.1339	4.0277	NA	3.6064	1.1821	4.4841	3.2406	0.294	3.3277	NA	1.6704	3.0419	3.2838	1.9123	1.0861	1.1821	3.235	1.2762	NA	1.5845	NA	2.4141	3.2766	3.0545	1.0766	2.3086	2.1493	3.0663	2.7933	2.3066	3.0602	2.8282	0.115	2.8974	2.3414	4.2817
DNM1DN8-2	-0.0559	-0.038	-0.0695	0.0607	0.2845	-0.1536	0.1309	0.3265	-0.304	-0.4035	-0.1681	0.1467	0.0676	0.1164	0.1309	0.1622	-0.3603	-0.6148	-0.191	0.1852	0.069	0.1493	0.1177	-0.2126	-1.1234	-0.1795	-0.8288	-0.0664	-0.3511	-0.3237	-0.1763	-0.0145	-0.1552	-0.2159	-0.0679	-0.4247	0.2179	-0.0877	-0.4286	-0.1424	-0.3401	-0.0954	-0.1408	0.0663	-0.1472	-0.2793	-0.6016	0.2154	-0.281
TMEM85	-0.5353	-0.2636	-0.0058	-0.8186	-0.5735	-1.152	-1.191	-0.3292	0.4415	-0.2328	-0.5886	-0.3165	-1.5649	-0.7588	-1.0233	-1.0801	0.0909	-0.7394	-1.7322	-1.5228	-0.1062	-0.1746	-0.1329	-0.0847	-0.1472	-1.5606	-0.749	-1.1329	-0.7322	0.0936	-0.9971	-0.7809	-0.0649	-1.5312	-1.5778	-0.1697	-0.5585	-1.7226	-1.0174	0.0482	-0.9885	-1.6215	-1.2863	-0.0469	-0.9518	-0.1062	-1.4383	-1.4305	-0.9771
IREB2	-0.3255	-1.0469	-1.0529	-0.699	-0.5778	-0.2498	-0.749	-0.8288	-0.5649	-1.152	-0.7563	-0.2653	-1.0469	-0.484	-0.48	-0.2636	-1.1297	0.3022	-0.9574	-0.8365	-0.8997	-0.7084	0.1763	-0.9159	-0.4403	-0.8237	-0.2413	-0.889	-1.035	-0.8262	-0.7784	-0.5479	-1.1047	-0.8059	-0.8084	-0.7884	-0.7784	-0.6326	-0.484	-0.3696	-0.3492	0.0566	-0.5778	-0.881	-1.1297	-0.7298	-0.5437	-0.5951	-0.6126
LCMT2	-1.1617	-0.2193	-0.5821	-0.4521	0.3984	-1.0923	-0.7131	-0.4403	-0.2481	-0.4659	-0.5043	-0.2758	-1.1779	-1.0893	-0.9799	-1.1078	-0.7539	-0.4941	-0.7588	-1.1746	-0.2602	-0.1861	-1.1234	-0.3511	-0.8573	-0.9351	-0.7466	-0.2464	-0.7563	-1.041	-1.035	-0.0014	-0.1376	-1.1552	-0.699	-0.1746	-1.3959	-0.9051	-0.4074	-1.5995	-0.3255	-0.0029	-0.5043	-0.4228	-1.1617	-0.5628	-0.9462	-0.527	-0.3715
INOC1	-0.5735	-0.4383	-0.4383	-0.0574	0.2869	-0.527	-0.4228	0.1309	-0.9269	0.037	0.1712	0.2079	-0.8836	-0.2584	-0.2059	0.3288	-1.1047	-0.4442	-0.3921	-0.0514	-0.1203	-0.2481	-0.5585	0.5519	-0.5951	-0.7202	-0.2498	0.229	-0.1552	-0.3004	-0.3566	-0.144	-0.1779	-0.486	-0.1943	0.7527	-0.3997	-0.1926	-0.0247	0.175	-0.0203	-0.4982	-0.417	0.0868	-0.1488	-0.4481	-0.0058	-0.4344	-0.1062
D4ST1	-0.6574	-0.8186	-0.5166	-0.3603	-0.2311	-0.9914	-0.6461	-0.7155	-0.6484	-0.6781	-0.4659	-0.2396	-0.6827	-0.5374	-0.4961	-0.5374	-0.8997	-1.1234	-0.6735	-0.1219	-0.8211	-0.4189	-0.1714	-0.3603	-0.9241	-0.9379	-1.8365	-0.685	-0.8365	-0.897	-1.0203	-0.9971	-0.4461	-1.2042	-0.4659	-0.3364	-0.114	-0.456	-1.0029	-0.8288	-1.038	-0.7637	-0.7661	-0.488	-0.191	-0.5543	-1.2619	-0.4779	-0.6237
C16orf61	-0.6827	-0.4639	-0.5907	-0.0985	-0.2193	-0.9051	-1.304	-0.9351	-1.0923	-0.771	-0.6082	-1.1047	-0.3022	-0.5353	-0.462	-0.4699	-0.9159	-0.4325	-0.5692	-0.3603	-1.0291	-0.7661	-0.488	-1.0499	-0.8237	-0.4422	-0.1313	-0.0695	-0.6967	-0.6781	0.514	-0.606	-0.6237	-0.5064	-0.6484	-0.949	-1.0469	-0.5312	-0.331	-0.1329	-0.5002	0.0043	-0.462	-1.0058	-0.0877	-0.5951	-0.3492	-0.3383	-0.0365
GALNS	-0.8237	-0.4779	-0.7859	-1.2584	-1.7131	-1.7274	-1.2828	-1.2619	-1.5228	-1.1424	-1.0954	-1.5353	-0.6873	-0.8135	-0.8211	-0.9132	-1.0203	-1.6758	-1.074	-1.5606	-0.811	-0.8009	-0.8443	-0.9078	-0.4982	-1.7226	-2.5907	-1.1779	-1.1943	-0.9051	-1.6394	-0.7959	-0.2567	-0.9828	-1.5187	-1.0087	-0.6506	-1.3997	-1.2619	-1.0029	-1.7084	-1.4461	-1.3076	-1.0058	-0.8237	-0.1976	-2.1779	-1.7274	-1.3328
GOT2	-2.3219	-1.5821	-1.6259	-1.6666	-1.6484	-2.8573	-2.6804	-2.3147	-2.3959	-2.6082	-2.0589	-2.4659	-1.9546	-2.2311	-2.5064	-2.1329	-2.1266	-2.7179	-1.7959	-2.0529	-1.527	-2.6082	-2.0291	-2.458	-1.4189	-2.6349	-3.2653	-2.3292	-2.5907	-2.1392	-2.2311	-1.8573	-1.4659	-1.7418	-2.816	-1.7612	-2.3733	-2.3076	-2.4344	-1.5821	-2.4344	-1.816	-2.5312	-2.3292	-3.2109	-1.1109	-3.2109	-2.5821	-2.3147
CRISPLD2	2.7797	0.6397	2.3228	2.0179	0.7242	1.03	0.7075	1.044	1.9332	2.6889	0.6526	2.0169	0.8828	1.6271	0.9723	0.0594	2.6754	0.2678	0.0482	0.903	-0.8573	3.4738	-0.4719	1.2863	2.195	1.2504	0.3391	-0.6193	1.0963	1.9015	0.6248	-0.1172	0.8592	0.0101	1.9107	2.9132	2.5122	0.3561	0.7824	0.8828	-0.5002	0.7824	0.9107	1.442	2.2057	0.7398	1.6055	-0.1993	1.8926
WFDC1	2.014	3.0951	4.025	2.1718	2.8622	1.2467	1.6243	4.1739	2.4792	3.5248	3.2787	1.7916	1.7342	2.2287	3.1867	3.8359	3.3547	-0.5907	1.9738	3.0374	1.9642	2.7011	1.46	2.6211	2.5378	3.268	1.9723	0.8961	2.2019	3.6369	3.07	1.2314	1.8864	2.2041	2.5678	2.4455	4.3978	2.5929	2.1564	0.7536	2.0169	2.4316	3.8866	3.1344	4.3957	1.6826	2.4507	0.044	2.7991
IGSF6	5.2739	6.7879	5.5317	6.4157	5.439	3.9165	6.4643	6.7735	6.234	5.8887	6.2606	4.2869	6.4733	5.9995	6.879	3.5185	5.7377	5.797	6.0841	7.0433	5.9198	5.2854	2.636	5.825	6.0553	4.435	6.5851	6.0538	5.6488	5.3484	6.1583	4.0461	6.0909	4.295	5.4809	5.6868	6.1212	5.4145	6.5509	6.2003	6.7087	4.7339	7.5415	6.6907	6.1469	6.1315	3.8972	5.8728	7.0011
DDX28	-0.8678	-0.2916	-0.2294	-0.1861	0.338	-1.3884	0.127	-0.7563	-0.3789	-0.3659	-0.8599	-1.041	-0.7013	-0.8288	-0.0725	-0.4208	-0.9187	-0.4286	-0.3771	-0.1031	0.2066	-0.7298	-1.1552	-0.454	0.03	-0.8059	-0.9856	-0.2671	-0.3865	-0.6282	-0.4442	0.2714	0.0328	-0.4208	-0.5374	-0.0262	-1.0589	-0.48	-0.4266	-0.16	-0.417	-0.5353	-0.5778	-0.6827	0.0426	-0.3827	-1.152	-0.4719	-0.3383
CA7	NA	NA	-0.2533	-1.5951	NA	NA	NA	0.6098	NA	NA	NA	NA	NA	NA	NA	0.4531	NA	NA	NA	NA	NA	NA	NA	NA	NA	NA	-0.4093	NA	NA	0.745	-2.1329	NA	-0.0336	-0.699	0.8679	-1.2277	NA	NA	NA	NA	-0.816	NA	NA	NA	NA	NA	NA	NA	NA
CMTM1	0.6844	0.275	-0.1811	-0.4403	-0.4901	0.4854	0.6498	0.4854	1.4103	0.4027	-0.3603	0.33	2.1852	-0.3789	0.1712	0.9501	-0.6304	-0.0145	-0.2059	1.7816	1.5768	-0.7013	-0.2142	-0.2009	0.4594	0.5898	0.6173	2.3448	-0.7298	0.1454	0.5734	1.0772	-0.5416	-0.484	-0.3511	-0.3076	-0.013	-0.1329	0.0538	0.2869	0.6276	1.1499	0.9797	-0.3622	0.0286	-0.1665	0.3852	0.54	0.2363
PLCG2	2.3948	1.6088	0.8343	1.5306	1.5553	0.3584	2.3559	1.9924	1.5675	2.4563	1.9123	0.7866	1.0419	2.8718	2.1263	1.3516	1.6736	1.9778	0.9328	1.8274	0.679	2.7759	-1.6804	1.7579	2.2357	1.54	2.6794	1.1362	2.5064	2.3237	2.3785	0.1699	0.7999	0.4168	2.6157	2.5636	1.3934	0.6663	2.0437	1.952	2.6459	1.3545	2.269	1.8659	2.3115	1.5739	0.8953	1.669	2.5845
EMP2	1.196	1.7176	1.3138	1.0461	2.8464	1.0635	2.4396	2.0993	2.3581	2.3366	1.9764	1.8139	1.988	1.2284	2.0594	1.8119	1.5195	1.5216	2.0356	2.0976	1.2804	0.9538	-1.3437	2.4082	2.0514	1.9092	1.6378	1.9635	1.3351	1.9975	1.1859	2.9443	2.7805	1.6022	2.5782	2.2869	0.9479	2.9262	1.9377	-0.2159	2.2669	2.1836	1.5685	2.2391	2.9073	1.2863	2.676	1.8953	1.3668
PCOLN3	-1.0029	-0.3255	-0.6506	-0.2881	-1.0559	-1.1877	-1.3004	-0.3219	-1.1297	-0.6943	-0.6193	-1.1078	-0.5002	-0.7155	-0.8288	0.2079	-0.6016	-0.771	-0.749	-0.4901	-0.7563	-1.1047	-0.6873	-0.9546	-0.3401	-1.7131	-1.816	-0.3959	-1.2379	-0.0544	-1.2109	-0.3094	0.3752	-0.8997	-0.9296	-0.706	-0.6967	-0.9379	-1.1552	-0.0649	-1.4035	-0.8391	-1.3696	-1.1488	-1.5522	-0.3529	-1.7859	-1.2109	-0.7515
RPS2	-1.0174	-0.963	-0.7298	-1.0262	-1.8678	-1.077	-0.9885	-1.6394	-0.0649	-0.191	-0.6666	-1.1649	-1.0321	-1.1203	-1.1617	-1.7418	-0.4719	-0.0145	-0.0801	-1.4501	-0.4228	-1.191	-0.7394	-0.5951	0.511	-0.7784	0.3984	-0.5585	-1.035	-0.8288	-0.482	-0.4501	-0.3884	-0.1795	-0.9914	-0.4759	-1.255	-1.3921	-0.0619	-1.1649	-0.2026	-1.3255	-0.9078	-1.1681	-0.737	-0.1488	0.7338	-0.5458	-0.6237
TBL3	-1.6943	-0.7155	-1.1297	-2.1266	-1.9324	-1.5353	-1.486	-1.873	0.0384	-1.7466	-1.9828	-0.9714	-1.6126	-2	-2.1456	-2.041	-0.873	-1.2379	-2.0954	-2.6804	-0.9462	-1.737	-2.7661	-1.8836	-1.5395	-3.0233	-2.4739	-1.6304	-2.0831	-1.2379	-1.8059	-0.9241	-0.7834	-1.8943	-2.3364	-1.7322	-0.889	-1.9714	-1.5778	-1.7563	-1.2934	-1.7809	-1.8417	-0.9132	-0.9241	-0.0174	-1.816	-2.1649	-2.5821
RAB11FIP3	-0.0985	0.5627	0.281	0.45	0.3907	-0.4901	0.6517	-0.6643	0.4114	-0.097	-0.0908	0.9862	0.6508	-0.0499	-0.1617	0.2714	0.3471	-0.0755	0.24	0.4626	0.4114	-0.3255	0.1124	0.2141	-0.035	-0.5291	-1.415	0.5331	-0.3585	-0.482	-0.2076	1.0503	0.774	0.1583	0.3907	0.338	0.4436	0.2079	0.1362	-0.6082	0.175	0.5724	-0.1047	0.0813	1.1084	0.4926	-0.038	0.4082	-0.1282
LUC7L	0.4709	1.1782	-0.0725	1.434	0.818	1.2197	1.9826	1.0976	0.8914	0.0718	0.6835	1.369	1.3179	1.6996	0.8007	1.5336	0.5714	0.5018	1.6489	2.1561	0.827	1.2998	1.792	0.2449	0.9613	0.6211	0.6853	0.9007	1.0524	0.5782	1.1097	1.5777	0.8655	1.3357	1.2455	1.1557	0.5079	1.4016	0.7312	0.3718	0.8327	0.6871	0.0552	0.9199	1.9866	-0.2515	1.3323	1.6978	0.7899
PSMD7	-0.8494	-0.4501	-0.8034	-0.6666	-0.035	-1.2898	-1.4035	-0.9574	-1.5606	-0.8704	-1.0499	-1.3076	-0.6506	-1.071	-0.8678	-0.9885	-1.3147	-0.9269	-1.4305	-0.8943	-1.1943	-1.3292	-1.3733	-1.1078	-1.2447	-0.8443	-1.2042	-0.5249	-1.0649	-1.3004	-0.8468	0.0649	-0.6171	-1.0801	-1.1456	-1.2863	-1.2447	-1.0529	-1.3771	0.2066	-0.7394	0.0881	-0.5864	-0.9942	0.6145	-1.0439	-1.5479	-0.5778	-0.3997
CORO1A	2.748	2.3699	2.3716	2.3545	1.109	1.3374	2.3323	2.3334	2.0307	2.5271	2.6537	2.1424	2.4174	3.0275	2.5135	1.679	2.3103	2.4813	1.0531	1.6346	2.3054	2.5575	1.0697	2.4425	2.5731	1.1084	1.8938	1.3612	2.7325	2.2188	1.101	1.5806	2.2714	1.5069	2.7088	2.1329	2.4576	1.6658	2.5794	3.0065	2.736	1.6785	1.818	2.6971	2.0004	3.0914	0.8758	1.2696	1.4141
SULT1A2	1.0384	2.0949	0.6745	1.6415	2.5455	-0.2126	1.5931	1.7803	1.6045	1.6462	1.8781	1.5685	1.8612	1.2473	1.7381	1.6599	0.8608	1.0847	3.2429	1.9978	1.0454	1.272	0.7066	2.5316	1.308	1.5965	0.9381	2.3297	0.9826	1.6159	0.0356	2.5263	2.3211	2.858	1.8667	2.3793	1.5059	1.8821	1.6835	1.9745	2.4388	1.2588	2.2101	1.7995	2.1855	1.2073	1.9638	1.2666	1.7207
SIAH1	0.3219	-0.1094	0.2179	0.0086	0.6239	-0.1536	-0.4759	-0.0939	0.7545	0.6772	-0.2723	-0.7909	0.2327	-0.3419	-0.4961	-0.8916	0.3103	-0.1488	-0.4208	-0.0336	0.2998	-0.0029	-0.2863	0.4709	1.2898	0.3092	-0.3585	0.4415	-0.041	0.8432	-0.1125	1.1362	0.9107	0.4244	-0.3733	0.5974	0.0286	0.2191	-0.0559	0.543	0.301	0.119	0.4005	0.1309	0.585	0.3573	0.1164	-0.6038	0.52
PRSS27	0.3685	-0.4501	-0.8783	0.1283	0.2762	1.4431	-0.8211	-1.0116	-0.1329	-1.3255	-0.5023	0.8278	-0.0589	-0.2243	-1.0985	-0.0893	-0.243	-0.4501	-0.6016	-0.2688	0.1283	-0.2567	-0.0649	-0.8678	-1.1329	-0.8678	-1.5778	-0.9546	-0.5208	-0.7418	-1.6215	-0.8391	0.5231	0.976	-1.3147	-0.013	0.4147	-0.5064	0.5089	-0.881	-0.3474	-0.462	-0.0893	-0.9771	0.2666	-1.0203	0.4489	-0.7612	-0.9546
NOB1	-1.5649	-0.8863	-2.0831	-1.3921	-1.5479	-1.8783	-0.5756	-1.527	-0.6461	-1.8625	-1.221	-2.2723	-1.3884	-1.5023	-1.7322	-1.3328	-1.527	-1.6897	-1.4189	-1.5606	0.103	-1.811	-1.3585	-1.462	-0.4639	-1.486	-2.077	-1.2009	-1.6758	-1.1329	-1.5606	-1.1361	-0.331	-0.1408	-1.7661	-1.3733	-1.5778	-1.6897	-0.8573	-0.9743	-1.3511	-1.5606	-1.9942	-1.5353	-2.1392	-0.5023	-2.3808	-2.2863	-1.9434
BBS2	0.2054	0.5917	0.419	0.7225	1.2975	-0.3058	0.5018	0.6341	-0.3401	0.5724	0.9694	-0.7735	0.6645	0.4276	0.7347	-0.1488	-0.3201	0.2104	1.0875	1.115	1.1928	0.0412	-0.0544	0.8164	0.9411	0.3674	0.4114	1.315	0.5241	0.3092	0.5898	1.6875	1.6658	1.148	0.5792	1.3499	0.3584	1.1667	0.6041	0.6145	0.4957	0.5965	0.6295	0.3323	1.4536	1.2618	0.1801	0.4573	0.9328
MT2A	-0.3328	0.5945	-2.4739	-1.074	-1.0145	-0.0679	-1.6171	-1.9771	-1.4266	-0.1976	-1.3511	-0.1219	-1.3808	-0.6215	-0.2934	-2.4501	-0.46	-0.3603	-2.3219	0.0186	1.1744	-0.706	0.224	-2.0291	-0.2863	0.2881	-1.0233	-1.9379	-0.8211	-2.077	0.992	-0.2533	-0.7084	-2.1976	-1.191	-1.0058	-1.1488	-0.415	-1.1976	-0.3364	-1.852	0.9797	-0.963	-1.3696	0.0594	-0.5043	-1.3959	0.7181	1.6017
HSPBP1	-0.5312	-0.4228	-0.7784	-0.2969	-0.484	-0.2934	-0.0218	-0.1016	-0.8034	-0.5585	-0.2828	-0.1617	0.0963	0.0201	-0.0619	0.6164	-0.6712	-1.041	-0.3328	-0.2009	-0.0604	-0.5799	0.2054	-0.1828	-0.6439	-0.415	-0.9686	-0.4679	-0.8391	-0.4679	-0.6552	-0.5105	-0.5821	-0.4286	-0.0277	-0.5713	-0.0291	0.051	-0.3183	-0.0262	-0.3511	-0.2009	-0.2345	-0.0218	-0.4779	-0.0365	-0.8288	-0.304	-0.3659
COX4NB	-1.5353	-1.1361	-1.5649	-1.1203	-1.038	-1.9324	-1.9771	-1.771	-2.3585	-1.5564	-1.6304	-1.7612	-1.4266	-1.5951	-1.6666	-1.3364	-2.1266	-1.7322	-1.4344	-1.1552	-1.3147	-1.6082	-1.3846	-1.6126	-1.5105	-1.4699	-1.7959	-1.0649	-1.7563	-2.1649	-0.9574	-0.1062	-0.8417	-1.114	-1.8783	-1.5951	-1.949	-1.3696	-1.8468	-0.7884	-1.7179	-1.2619	-1.8009	-1.8211	-2.1844	-1.482	-2.5564	-1.4383	-1.3548
PMFBP1	1.6164	1.3242	0.9283	1.6947	0.1953	0.0731	1.0524	1.2654	0.0257	1.3724	0.6164	0.0827	1.3386	0.7681	2.8096	0.5734	0.8875	1.342	0.8408	2.0704	1.0909	0.7102	0.8392	0.4016	1.6586	-0.685	1.8383	0.779	0.3254	1.9931	-0.1109	0.0468	1.7093	1.7185	1.1808	0.5724	1.144	0.3785	1.3242	1.1401	0.3311	-1	1.9789	0.7974	0.8082	1.8098	1.125	2.0454	2.3306
FUS	-1.6259	-1.3511	-1.041	-1.3846	-1.8678	-1.3076	-1.8625	-1.8314	-0.4679	-1.7037	-2.6897	-0.4208	-1.3696	-1.662	-2.2379	-2.8365	-1.1078	-2.0589	-1.8783	-1.9546	-1.5353	-1.3437	-1.8314	-1.6259	-0.7809	-2.2723	-2.5146	-2.077	-1.2898	-1.0679	-2.3808	-1.6758	-1.1976	-1.1552	-1.4699	-1.0145	-1.3474	-1.7131	-1.2447	-1.6574	-1.8009	-1.7612	-2.3808	-1.4699	-0.897	-1.1266	-2.2934	-2.0058	-1.7959
TMEM142C	0.6041	0.2054	-0.16	-0.3004	-0.114	-0.6712	-0.1001	0.2066	0.1941	-0.243	-0.0514	0.2869	-0.3147	-0.462	-0.2636	0.0115	0.5695	-0.2793	0.2963	-0.2226	0.1827	-0.1665	0.229	-0.1125	-0.3771	-0.8391	-1.2688	0.8408	-0.7418	0.473	-1.1681	-0.1361	1.0377	-0.1976	-0.3474	-0.1504	-0.1345	-0.3237	-0.3255	0.127	-0.1894	0.0813	-0.0291	-0.0469	0.384	0.1375	0.1979	-0.0755	-0.6439
PPL	0.9493	2.2945	1.0208	0.0398	-0.3219	0.8938	1.0036	1.0314	1.4916	0.6285	1.1693	0.9568	1.0328	1.08	0.0058	0.6452	1.8094	0.224	0.7824	0.8139	2.2919	0.3896	0.7004	1.2135	0.7172	0.3774	-0.3383	1.0676	-0.3111	1.854	-1.3771	2.0317	1.848	0.9701	-0.074	1.0398	1.3584	0.4573	1.2091	0.8448	0.7093	0.1003	-0.2515	1.4983	1.3092	1.9833	-0.0072	-0.2026	-0.5606
CHST6	-0.2345	2.8856	2.3394	3.7719	2.9088	1.7626	-0.737	-1.8314	2.5972	0.8608	-2.4189	2.0115	0.8875	1.2863	1.2916	1.9088	0.294	1.0976	0.1532	2.3303	3.4141	0.0718	1.4558	0.0144	1.6369	1.4255	-2.0954	-1.0985	0.6126	-1.771	3.0887	4.0045	-1.035	-4.0541	0.91	1.0573	0.3092	-0.4364	-2.3076	-0.3419	1.1063	2.8442	1.0461	0.3951	3.6415	1.937	1.8242	2.9048	0.7883
ACSM1	1.4558	2.8508	1.9358	0.7485	1.7194	3.497	4.784	3.8679	3.9635	3.8629	5.4012	2.1213	3.3716	1.4054	0.5049	1.5617	3.8924	2.0426	3.8156	3.3978	4.5342	3.6679	NA	2.5583	3.8797	2.6767	0.2253	5.1779	0.0257	2.7386	0.0129	2.9712	4.4216	2.5943	1.168	4.6548	1.342	3.2227	3.1375	4.5868	3.5729	4.204	5.1301	4.6741	4.7049	2.058	3.5789	3.0875	3.757
ADCY7	1.0129	-0.304	-0.2969	0.3219	0.5627	-0.4286	0.0129	-0.2362	-0.2934	0.3629	1.0475	-0.7588	0.03	0.4854	1.3414	0.8953	0.7303	0.3852	0.5656	0.7562	0.0257	-0.1746	1.1401	0.9389	1.0086	0.1414	0.3231	0.7698	0.5724	0.5301	0.2774	-0.9296	0.8552	0.5782	0.4038	1.6253	0.7732	0.0718	0.5607	1.4563	0.6201	0.0621	0.3231	0.2449	1.4725	0.4813	-1.9942	0.6572	1.0029
39334	-0.0336	-1.0801	-0.4461	-0.1649	-1.1779	-0.3511	-1.2176	-1.0262	-0.1844	-0.5023	-0.852	-0.4016	-0.3529	-0.6712	-0.8494	-0.4679	0.3185	0.0172	-1.4422	-0.2619	-0.9518	-0.7909	-0.7394	-0.5564	-0.1714	-1.3548	-1.0801	-0.9296	-0.3474	-0.5799	-1.5023	-0.816	-0.2277	-1.2277	-0.9296	-0.6171	0.1596	-0.8757	-1.2969	-0.4982	-1.2898	-0.3884	-0.8494	-0.2602	-0.488	0.224	-1.0145	-1.1681	-1.255
MRPS23	-0.6967	-1.0529	-0.4901	-0.9971	-1.2515	-1.1392	-1.152	-1.3733	0.119	-0.9546	-0.7131	-0.7539	-0.488	-1.3255	-1.3808	-2.1203	0.8781	-0.8059	-1.3255	-1.304	-0.9105	-1.1297	-0.0939	-0.5002	0.0398	0.6192	-0.3659	-0.4383	-1.1488	-0.8417	-0.6666	-1.041	-0.0336	-0.462	-0.8417	-0.6643	-0.725	-1.0589	-0.5522	-0.482	-0.6643	-0.4442	-1.3959	0.1878	-0.4422	-0.2881	0.3629	-0.6193	-0.7155
APBB2	-0.1234	-1.3474	-0.606	-0.3959	-0.8468	0.4542	-0.7563	-0.1219	-1.2109	-0.9518	-0.6038	-0.3383	-0.9771	0.08	-0.304	-0.8237	-0.3789	-1.4901	-0.1345	0.5782	-2.2109	-0.1219	0.7596	-0.3474	-0.5864	0.0144	-1.1617	-1.5437	-0.7959	-1.2793	-0.074	-1.482	-1.4659	-2.071	-0.4266	-0.8443	0.0922	-0.7108	-1.2042	-1.527	-0.8391	-0.0801	-0.725	-0.1536	-0.0679	-1.8211	-1.1617	0.512	-0.0174
TMEM11	-1.0439	-1.3292	-1.3548	-1.4901	-1.3147	-1.6484	-1.1649	-1.2653	-1.6171	-1.5821	-1.7322	-0.8599	-1.5437	-1.2653	-1.4305	-1.4112	-1.1584	-1.6574	-1.1552	-1.3255	-1.6215	-1.4659	-0.4247	-1.5023	-1.6394	-1.5564	-1.4699	-1.527	-1.3659	-1.3474	-1.2793	-1.5564	-1.4501	-1.0499	-1.6897	-1.071	-0.816	-1.5907	-1.6171	-1.3585	-1.3921	-0.811	-1.6897	-0.6643	-1.3437	-1.0985	-0.7784	-1.3328	-1.415
TCAP	0.0976	-0.3511	0.0029	-0.0634	-0.4055	-0.1976	0.24	0.148	-0.7588	0.3752	0.0813	-0.0877	0.0314	0.0243	0.7075	3.1957	0.0186	0.0704	0.1979	-0.0529	-0.2916	-0.2294	0.175	0.1674	0.4803	1.119	0.1545	-0.1125	-0.1617	0.6826	0.1043	-0.5649	-0.4383	0.5945	0.9283	-0.1828	0.3219	0.7732	0.1941	0.1686	0.0922	0.1776	0.4276	0.7715	-0.0589	0.229	-0.5125	0.4647	0.539
TNK1	-0.6506	-0.0801	0.4005	-0.4305	-0.3511	-0.4112	-0.8625	0.583	-0.2688	-0.3456	-0.456	0.3277	-0.0939	-0.4699	-0.9241	-0.041	-0.4383	-0.3364	-0.5864	-1.8468	0.2702	-0.2498	-0.6643	-0.2277	-0.3364	-0.776	-1.4422	-0.0277	-0.274	-0.016	-0.5907	0.3606	-0.2328	0.8647	-0.7884	0.0936	-0.2898	-1.1392	-0.8314	-0.2671	-0.5312	-0.488	-1.9658	-0.2653	0.6257	0.7799	-0.1779	-1.0174	-0.8916
RPA1	-1.8997	-1.5064	-1.1234	-1.7418	-1.4779	-2.0233	-1.7274	-1.5735	-1.482	-1.0954	-2.0831	-0.7959	-1.4501	-1.6758	-1.7515	-1.8262	-1.1016	-1.3437	-1.4461	-1.6943	-1.6038	-1.5864	-1.7226	-0.9241	-1.6126	-1.3548	-1.0529	-1.3846	-1.1976	-1.7418	-1.5692	-1.4699	-1.0116	-2.1203	-1.4266	-1.1714	-1.5951	-1.8468	-1.662	-1.816	-1.3437	-0.7515	-1.0116	-1.5778	-1.6126	-0.3715	-0.5713	-1.1329	-1.038
TSR1	-2.3808	-2.1976	-1.5649	-2.0831	-2.2723	-2.458	-3.0233	-2.5821	-2.4982	-2.5228	-3.0954	-1.7563	-2.8365	-2.6529	-2.9885	-2.776	-1.9602	-2.0058	-2.1976	-3.0589	-2.4901	-1.9602	-1.8365	-2.1844	-1.304	-2.2379	-1.4941	-2.4422	-1.9942	-2.2515	-1.0893	-2.662	-2.2243	-2.6529	-2.482	-1.9885	-2.4266	-3.0116	-2.3884	-2.3364	-1.811	-1.5692	-2.3733	-2.9658	-2.5649	-1.2969	-1.2688	-2.3437	-1.7909
KIF2B	NA	NA	NA	NA	NA	NA	NA	NA	NA	NA	NA	NA	NA	NA	NA	NA	NA	NA	NA	NA	NA	NA	NA	NA	NA	NA	NA	NA	NA	NA	NA	0.1177	NA	NA	NA	NA	NA	NA	-1.2413	NA	NA	NA	NA	-0.3129	NA	NA	NA	NA	NA
ZNF179	-1.4344	-1.8943	0.3796	-0.8546	-1.6484	-1.1488	-0.3328	-0.5249	-1.6304	-0.1234	-1.4501	-1.6304	-0.9971	-0.3383	-1.5228	-0.2881	-1.1811	-0.0087	-0.2126	-0.7274	-1.7859	-1.1746	-0.8339	-1.1329	-0.8573	-1.7179	-0.6461	-2.2653	0.08	-1.1078	-0.3622	-1.8365	-1.4228	-0.1746	0.2129	-0.6148	-0.9406	-1.3219	-1.7037	-0.7884	-1.1617	-1.1746	-1.2584	-0.8034	0.7621	-2.4982	-1.2515	-0.527	-1.3884
RCV1	NA	NA	-1.9434	NA	NA	NA	NA	-0.2584	NA	NA	-0.0695	NA	NA	-0.2142	-0.482	0.2461	0.08	NA	NA	NA	NA	NA	-1.5907	NA	NA	NA	NA	NA	NA	-3.0589	-0.1763	NA	0.0058	NA	NA	NA	NA	NA	NA	NA	NA	-0.9078	NA	NA	NA	0.2998	NA	NA	0.547
USP32	-0.4286	-0.9159	-0.5458	-0.8494	-0.606	-0.5522	-1.2898	-1.1681	-0.0029	-1.2413	-0.6643	-0.3022	-0.7984	-0.8084	-0.4403	-1.152	0.0426	-0.2109	-0.9105	-0.737	-1.5778	-0.8084	-0.1361	-0.8599	0.275	-0.0559	-0.6574	-0.6735	-0.9434	-0.5458	-0.1392	-1.1681	-0.8573	-0.4461	-1.2413	-0.7588	-0.2688	-0.3978	-0.6394	-0.0306	-0.5332	-0.6439	-0.6552	-0.4208	-0.8443	-0.4383	-0.1266	-0.0043	-0.6827
ACBD4	0.0412	0.2339	-1.0058	-0.606	-0.5886	-0.6506	0.3741	-0.2969	-0.144	0.0594	0.4468	-0.5353	0.2253	0.4699	-0.1361	0.3685	-0.527	-0.1552	0.0286	-0.2828	0.515	0.5271	-0.152	0.1257	-0.1313	-0.6827	-0.6689	-0.1282	-0.5395	0.3494	-0.8573	0.2654	0.9207	-0.0189	0.0524	0.0201	0.144	0.184	-0.0365	0.0909	-0.2009	-0.6552	0.1532	0.7155	0.4071	0.3852	-0.6461	-0.8468	-0.9379
MEOX1	0.3718	-1.1297	NA	0.5331	-1.077	-2.3585	-1.5735	-3.2793	0.4792	-0.0043	-0.7539	-0.1795	-1.6804	-0.9241	-0.3921	-1.2243	1.1616	-0.5312	-0.5166	-1.255	-1.4035	NA	-2.8573	0.9848	0.3057	-0.5064	-1.9269	-0.7984	0.0201	-1.0145	-1.462	-1.4982	-0.482	-0.9159	0.2702	0.4114	-0.4364	-2.1844	-0.1361	-0.7155	-1.1681	-2.1392	-0.243	2.2098	-0.1078	-0.2396	-0.749	-1.6484	-1.2828
ATP1A1	-0.0574	0.547	0.7874	0.5261	0.9782	-0.4305	-0.0469	0.4936	0.3663	0.0854	0.3288	0.4201	0.4308	-0.3129	0.1017	-0.5778	0.1414	-0.2723	-0.4982	-0.1329	1.3214	-0.5437	-0.3566	0.5646	0.2618	-1.3401	-0.8237	0.9351	-0.0877	0.7381	-1.3147	1.2412	0.7251	0.7459	-0.4208	1.3735	0.3852	0.0827	0.7459	-0.8084	0.281	-0.5002	-0.2515	0.7004	1.0243	0.8616	-0.9241	-0.1552	-0.6827
HAP1	NA	NA	NA	NA	NA	NA	NA	NA	NA	NA	NA	0.3929	0.1362	NA	NA	NA	NA	NA	NA	NA	NA	NA	NA	NA	-0.5437	NA	-1.1877	NA	NA	NA	NA	-0.2758	0.1204	NA	NA	NA	NA	NA	NA	NA	NA	NA	NA	NA	NA	NA	NA	NA	NA
RAB5C	-1.2481	-1.3846	-1.1172	-1.5064	-1.8468	-1.7909	-1.7859	-1.4739	-1.304	-1.6394	-1.0649	-1.3147	-1.3771	-1.7418	-1.0559	-1.3255	-1.7909	-1.4383	-2.077	-1.7612	-1.3255	-1.4982	-1.6943	-1.6943	-1.8009	-1.3255	-1.1617	-0.9828	-2.1078	-1.2311	-1.5228	-1.8573	-1.0679	-1.8314	-1.6038	-1.6126	-1.3733	-1.8059	-1.2481	-1.8009	-1.1877	-1.3921	-0.9105	-0.8237	-1.1584	-1.2311	-1.0862	-1.458	-1.2345
MBTD1	0.6636	1.7596	1.3391	1.7765	NA	2.0072	3.2091	2.0451	1.1237	NA	2.2543	0.696	1.5926	2.8504	2.3323	1.7325	NA	1.4	3.5311	3.0145	1.3918	0.0043	2.6756	0.7908	0.9546	NA	2.4457	NA	1.726	0.518	0.03	0.6154	0.1609	1.4044	-0.0189	1.4957	1.3685	2.2274	NA	1.4163	0.3973	NA	NA	1.7553	NA	NA	0.1763	NA	-0.9214
CACNA1G	-1.5778	0.4071	-2.3585	-1.527	-1.4739	-1.7466	-0.3884	-1.3255	-2.1779	-1.2515	1.473	-2.0529	-1.4779	-1.2345	-0.6781	-0.776	-1.0985	-2.4422	-1.2863	-0.6461	-1.486	-0.897	0.8286	0.0607	-1.8678	-1.9051	-3.5162	0.1661	-2.1392	-1.816	-1.9434	-1.8625	-1.1329	-2.5064	1.0036	0.5734	-1.1779	-1.2898	-1.7661	-1.1976	-1.0954	-1.9269	-2.776	-0.6804	-1.2688	-1.527	-1.7322	-1.2723	-1.2277
SPOP	-0.1472	-0.038	0.1137	-0.3022	-0.3827	-0.5208	-0.1156	-0.4055	0.2029	-0.2109	0.0949	-0.3219	-0.417	-0.2464	-0.4921	-0.8135	-0.1779	-0.3865	-0.226	-0.699	-0.3548	-0.3902	-0.0544	-0.3865	0.4038	-0.4422	-0.7612	0.1941	-0.4982	0.3994	-0.7834	-0.8997	0.2166	0.1635	0.0881	-0.0847	0.0745	-0.484	-0.1361	-0.4779	-0.0544	-0.2277	0.08	0.3763	-0.1584	0.3561	-0.8443	-0.5084	-0.4679
HOXB2	1.1197	4.2479	1.4478	0.3618	2.0377	-1.304	-0.7274	-0.3696	0.6996	0.8774	0.3584	-0.1078	0.3115	0.9493	0.745	1.6093	0.0086	2.6422	0.6012	1.3068	0.7613	0.5926	-2.6897	-0.1552	-0.4442	0.5898	-0.1329	-0.9546	0.9092	-0.6506	0.7536	4.5521	-0.2934	-1.5564	1.1859	0.5241	1.6897	-0.567	-0.4325	0.0976	0.1622	0.8065	0.8828	0.4038	0.9613	1.1276	-0.6349	-0.1094	0.6772
LRRC37B	-0.5886	-0.897	-0.1408	-0.7515	-0.8211	-1.077	-0.3456	-0.949	-0.6148	-0.7859	-0.1746	-0.9658	-0.1926	-0.4383	-0.7637	-1.0291	-0.6873	-0.0954	-0.1861	-0.6735	-1.2515	-1.1234	-0.0262	0.4158	-0.4422	-0.2076	0.3277	-0.3147	-0.4074	-0.7661	-0.3997	-0.9241	-0.3094	-0.0755	-0.5023	-0.0336	-0.4035	-0.041	-0.8546	-0.7539	-0.8704	-0.2636	-0.1062	-0.2109	-0.1536	-0.4208	-0.304	-0.4982	-0.5606
SLC13A2	0.8016	0.518	0.08	0.3494	0.338	1.0279	0.2437	0.5519	0.7347	0.3311	0.5028	0.7562	0.7233	0.9054	0.7924	1.157	0.6699	0.4957	0.7084	0.6003	1.2179	0.8229	0.3346	0.7866	0.6003	0.4478	-0.4982	0.7286	0.0257	0.6844	-0.394	0.08	0.8703	0.3219	0.84	0.848	1.4605	0.8961	0.7596	0.4998	0.1545	1.157	1.1953	0.8544	1.0813	1.2546	-0.1456	0.9358	0.2534
SDF2	0.0356	-0.0725	0.4854	-0.5166	-0.5437	-0.243	-0.2793	-0.394	0.7004	-0.226	0.1349	-0.0679	0.0909	-0.2775	-0.7179	-0.4442	0.6572	-0.0649	-0.7442	-1.0262	-0.486	-0.4208	0.2203	0.107	-0.041	-0.5864	-0.8546	0.1928	-0.5995	0.2678	-1.415	-0.7202	0.4308	-0.0786	-0.5395	-0.0218	0.3265	-0.5458	-0.8494	-0.3585	-0.4035	-0.1959	0.0881	0.7732	0.54	0.3022	-0.2898	-0.9379	-0.8704
CORO6	0.7638	-0.1877	0.0144	0.111	-0.0425	0.1635	0.2461	0.7459	-0.3346	0.3254	0.2253	-0.1943	1.378	0.5984	0.7715	1.6355	0.2857	0.0058	0.8821	0.4125	0.0936	0.515	1.6022	-0.0218	0.7841	0.6201	-0.2413	0.0635	0.1712	0.5955	0.538	-0.1568	-0.3022	-0.2688	0.9899	0.4027	0.5965	0.7286	-0.1926	0.7774	0.7225	1.3573	0.08	0.7442	0.546	-0.1488	-0.1633	1.0888	0.8016
CENTB1	3.3868	3.4634	2.2216	3.6599	2.7277	3.4647	4.0036	3.2343	3.03	3.3391	3.9955	3.6404	2.1087	4.0339	2.9149	4.1035	3.0286	3.2599	2.0447	3.0335	3.1494	3.6264	1.103	2.8426	2.9117	4.0626	3.7236	1.6627	2.537	3.8972	3.479	1.4751	1.8941	1.5907	4.2357	3.0607	3.3632	2.3199	3.8227	4.1069	3.848	3.8758	4.3176	3.4182	2.1431	3.406	NA	0.8221	2.9507
SLC2A4	-2.9105	-3.1203	-2.2109	-2.5564	-2.041	-2.2243	-2.2863	-2.2793	-2.6804	-2.5064	-2.458	-3.1078	-2.7466	-2.071	-1.7909	-2.1392	-2.9105	-3.0116	-2.0291	-2.2515	-3.2109	-3.0469	-1.5353	-2.5395	-3.482	-3.2934	-3.3748	-2.7661	-3.4998	-3.4266	-2.662	-2.035	-2.458	-1.9658	-2.2176	-1.852	-3.0469	-3.776	-1.9658	-2.1329	-2.4189	-4.3277	-2.7563	-2.3219	-1.5437	-2.7959	-2.7466	-2.3808	-2.4501
NALP1	0.2461	0.0412	-0.0058	0.1097	-0.2916	-1.415	0.0841	0.4415	-0.2898	1.3144	0.0704	-1.221	-0.3474	0.2582	0.24	-0.6416	-0.4461	0.24	0.9298	0.7824	-0.5395	0.4404	-1.6804	1.0607	0.7604	-0.191	0.0043	-0.2076	0.7321	0.3346	0.2314	0.5499	0.3231	0.7364	1.269	1.5455	-0.1472	-0.152	0.1725	-0.3201	0.0854	0.0745	-0.274	-0.1894	0.6425	-0.8391	0.2975	-0.1926	0.1349
KIF1C	0.0649	0.0243	0.2302	0.0881	0.2216	-0.013	0.1177	0.6173	-0.5564	-0.1047	-0.2464	0.1296	-0.0679	0.3426	0.3426	0.7031	-0.0831	-1.1016	0.0949	0.384	0.308	0.0841	0.384	0.0029	-0.7346	-0.0862	-1.2076	-0.0336	-0.2533	-0.0589	-0.55	0.2363	0.1865	0.269	-0.1456	0.103	0.3219	0.3918	-0.3022	-0.2396	-0.2379	0.1296	-0.0574	0.0172	0.0201	0.0101	-0.1297	0.1309	-0.3566
NMT1	-0.6461	-1.3364	-1.3219	-1.1617	-1.7909	-1.3884	-1.4659	-1.4305	-0.8916	-1.5312	-1.221	-1.2042	-0.9462	-1.1297	-1.2863	-0.8211	-1.5395	-0.7202	-1.0923	-1.5395	-1.5821	-1.2793	-1.1844	-1.4699	-1.415	-1.1714	-1.776	-1.4659	-1.6712	-1.074	-1.486	-1.9051	-1.8783	-1.6758	-0.9885	-1.7661	-0.699	-0.8863	-1.3548	-0.9856	-1.2447	-0.9574	-0.7563	-0.7735	-0.9462	-0.5973	-1.0649	-1.0923	-1.0801
HES7	-0.2328	-0.0831	-0.2009	0.0257	0.0649	-0.1828	-0.0014	0.1991	-0.4901	-0.417	-0.2828	0.0072	-0.0923	-0.0087	0.0676	0.24	-0.5228	-0.7298	-0.3094	0.1257	0.0384	0.1177	-0.0145	-0.4016	-1.0954	-0.3111	-0.8009	-0.243	-0.2653	-0.394	-0.1926	-0.0014	-0.2828	-0.2723	-0.1894	-0.3865	-0.1109	-0.2311	-0.6016	-0.1779	-0.5043	-0.3715	-0.3771	-0.0786	-0.3677	-0.5907	-0.7322	0.119	-0.3677
TIMP2	1.1037	-0.2845	0.5018	0.8254	-0.6193	0.9949	0.3852	0.3863	-0.3789	0.3528	-0.3622	-0.2328	0.4436	0.4709	1.898	0.3448	0.5811	-0.0634	0.1953	1.1801	-1.0116	-0.0877	-0.4659	-0.3201	0.4071	-0.1408	0.3173	-0.6529	0.1217	1.1979	1.3144	-1.1266	-0.7563	-1.3696	-0.0679	-0.3022	1.516	0.263	-0.1714	1.2516	-0.3219	-0.486	1.0676	0.2762	0.3573	-0.3401	-0.488	1.0531	1.2951
P4HB	0.0854	-0.074	0.5079	0.127	-1.2379	0.984	-0.8186	-0.4679	0.0356	-0.8135	-0.0336	-0.0174	-0.281	-0.6943	-0.8757	-0.4364	0.6107	-0.3401	-0.7934	-0.3183	0.4308	0.0272	0.0172	-0.5374	0.4803	-0.8573	-1.9051	-0.3094	-0.7226	-0.0425	-1.2584	-0.8494	0.2678	0.3505	-1.2009	-0.1714	0.2339	-1.041	-0.4699	0.2265	-0.5312	-0.4016	-0.0233	0.2339	-0.3696	0.4125	-1.4074	-0.5585	-0.8084
TK1	-1.9269	-3.8826	-1.7037	-2.5649	-3.3076	-0.873	-3.1329	-4.3808	-2.7084	-3.7583	-3.1203	-1.8783	-1.1976	-2.8783	-3.4532	-0.9518	-3.0116	-1.3659	-2.7274	-2.8365	-2.5312	-3.5047	-1.482	-4.1636	-2.8783	-1.7274	-3.2934	-3.5047	-2.776	-4.8201	-3.7486	-3	-2.2379	-2.4112	-4.4836	-3.8386	-1.9434	-2.7179	-3.4143	-0.2345	-3.0589	-2.2447	-3.3496	-2.7859	-4.1253	-0.9885	-3.8448	-2.4035	-2.776
PDE6B	0.7732	-1.0649	0.4967	-0.0679	-1.3921	-1.527	-0.6259	-0.8391	1.3707	1.051	-0.873	-0.4481	-0.2567	0.0384	0.0101	-0.5208	1.4147	0.9381	1.4103	-1.3548	0.6526	-0.1408	-0.114	0.9396	0.1738	0.8828	0.0566	0.2363	-0.0755	0.3829	-1.1617	0.688	1.1884	1.3879	0.0854	0.9906	0.1414	-1.1844	1.8045	-0.7131	-0.5332	0.5578	-0.9971	-0.1156	1.6069	0.4615	1.1362	0.5351	0.5907
FLJ35934	-2.458	-2.699	-2.4659	-1.1361	-2.9105	-3.1714	-2.9214	-2.5064	-0.5973	-2.662	-3.2379	0.1454	-0.3111	-1.9546	-2.2447	-1.3921	-2.5312	-1.152	-1.4189	-1.9885	-0.9241	-2.5649	-1.3076	-3.0469	-2.776	-2.2584	-3.0589	-2.2653	-1.9546	-2.8783	-2.4035	-0.4921	-2.0058	-3.8741	-1.873	-2.5735	-1.8678	-2.8468	-4.2136	-2.114	-1.852	-1.2653	-4.1228	-3.6822	-1.7131	-2.077	-2.2723	-1.5522	-1.8365
KRTAP9-8	NA	NA	NA	NA	NA	NA	NA	NA	NA	NA	NA	NA	NA	NA	NA	NA	NA	NA	NA	-1.074	NA	NA	NA	NA	NA	NA	NA	NA	NA	NA	NA	0.2314	-0.0014	NA	NA	NA	NA	NA	NA	NA	NA	NA	NA	NA	NA	NA	-0.4344	NA	NA
KRTAP3-1	0.6906	0.774	2.54	0.1738	0.7277	0.2166	-0.1094	0.1177	-0.152	0.3516	0.3907	-0.0816	-0.1329	0.2904	0.2678	0.1941	0.4233	-0.2076	0.1738	0.5291	0.1137	-0.2345	1.2702	-0.1926	-0.2916	1.7364	2.8343	0.2904	1.6439	-0.2159	0.123	-0.3884	0.6554	0.5079	1.782	0.1362	1.7273	-0.1078	0.6924	-0.5886	-0.0262	-0.9296	-0.1795	-0.0893	-0.4074	0.1738	-0.1329	-0.8573	-0.0725
KRT31	-0.1504	0.0635	0.229	0.0172	0.0014	0.8197	0.7347	0.9986	-0.8468	-0.3771	0.4936	0.2302	0.1941	0.745	0.7013	1.4415	-0.527	-0.4035	0.3863	0.4457	0.584	0.2228	0.8082	0.3288	-0.8365	0.5646	-1.2042	0.2054	-0.5649	-0.1746	0.0538	0	0.0963	0.1164	0.4201	-0.0559	0.4168	0.7277	0.1941	0.7424	0.2881	0.1725	0.3918	0.2449	0.294	0.394	-0.7298	0.4201	0.1941
OR3A3	0.8891	0.5936	1.111	-0.6259	1.5666	1.6466	1.2079	0.1801	-0.0559	1.9993	0.1057	0.6745	0.1506	0.8392	1.2179	1.2412	0.115	0.926	0.6599	0.6608	1.4076	0.1953	1.2975	1.2945	0.4383	0.5039	1.1204	0.5558	0.9679	0.636	0.545	0.338	-0.016	1.5758	1.2636	0.8148	0.373	0.5079	1.1177	1.2271	0.6452	0.2963	0.9635	0.4636	0.2857	0.6285	1.5059	0.2265	0.4699
CBX1	-0.1219	0.0552	0.7424	0.9978	-0.016	1.3391	0.8576	-0.2775	-0.4521	-0.7226	0.2582	0.5926	0.6323	0.3852	-0.1376	0.8032	-0.6943	-0.7563	0.8098	1.0573	-0.2845	-0.0908	1.8307	-0.7084	-0.4247	-0.5649	-0.5995	-1.3622	0.6924	-0.6552	-0.4422	0.2786	-0.2934	-0.038	-1.1649	-0.3076	0.8496	0.4351	-1.5395	-0.4403	-1.1779	-0.6038	-1.4982	0.3323	-0.949	-0.6552	-0.963	-0.3677	-0.7298
CEP76	-0.6597	-1.8468	-0.9241	-1.4112	-0.8009	-1.1078	-1.3401	-1.6394	-0.7884	-1.2584	-1.5864	0.2582	-1.4305	-2.0649	-1.771	-1.6394	-1.1844	0.2265	-1.4982	-1.5312	-1.6574	-1.3959	0.6708	-1.5864	-1.1681	-0.1016	1.0922	-0.9324	-0.7131	-1.7226	-1.4305	-0.6506	-1.6259	-0.8237	-1.6171	-1.0174	-1.3437	-1.6126	-1.1297	-1.7418	-0.699	-0.5353	-0.9885	-1.2863	-1.5064	-0.6781	-0.725	-0.8211	-1.3147
LOXHD1	NA	0.0621	NA	0.5772	0.103	1.0122	NA	0.6498	0.4362	NA	0.2951	NA	-0.486	-1.458	0.513	-0.3328	0.9419	-0.243	NA	NA	0.0854	0.0772	NA	0.1243	NA	NA	-0.1584	0.2091	NA	NA	NA	NA	NA	NA	NA	-0.4035	0.3403	-0.2533	NA	NA	NA	NA	NA	0.7476	NA	NA	NA	NA	NA
KIAA1012	0.4468	-0.0801	0.7119	0	1.334	-0.0174	0.6717	0.7459	0.7757	1.0072	0.8254	-0.041	-0.0469	0.6498	0.9138	-0.274	0.8976	0.9007	0.8504	0.6871	0.2339	0.3437	1.3511	0.6563	1.2792	0.9664	1.4699	1.0151	1.0573	0.9214	1.0969	0.7424	0.8568	-0.0847	0.7146	0.8032	0.175	0.4605	0.8922	0.2951	0.9222	0.8254	0.9523	0.1388	-0.2653	0.2845	1.4399	0.6351	1.144
AQP4	3.9117	4.3298	5.2836	3.3519	3.6769	NA	5.532	5.1069	4.3792	6.4451	4.9819	0.5231	3.5509	3.5886	5.3074	NA	6.9355	3.6171	4.4489	3.4995	4.5981	4.0144	NA	6.4002	5.6387	NA	4.5527	5.8194	5.4266	6.332	4.4561	6.4423	4.9274	3.4686	3.4931	5.7054	3.5185	5.4283	6.8567	1.472	6.9841	0.6808	6.371	2.5852	5.3082	2.9614	5.0286	2.7264	6.0268
FLJ11996	-0.2026	NA	NA	NA	NA	NA	NA	NA	NA	NA	NA	0.2029	0.2998	NA	NA	NA	-1.2758	NA	-1.0589	NA	-1.3921	NA	NA	NA	NA	NA	NA	0.3311	NA	NA	NA	NA	0	0.0243	NA	0.4016	0.0759	-0.3346	NA	0.2327	NA	NA	NA	NA	NA	NA	NA	NA	NA
NPC1	-0.6529	-1.255	-1.038	-1.4228	-0.5458	-1.8365	-1.221	-1.6259	-0.4739	-1.2142	-0.9351	-1.4189	-0.6781	-1.1617	-0.4719	-1.9942	0.7493	-0.7346	-0.6259	-0.9078	-1.3401	-1.7226	-0.1976	-0.5105	-0.6148	-2.0116	-1.5649	-1.0087	-1.0439	-0.3147	-1.1456	-1.1016	-0.5886	-0.7298	-1.9771	-0.2602	-0.7563	-1.0233	-0.7859	0.0963	-1.3255	-1.5353	-0.749	-1.0291	-1.3076	-0.6237	-1.662	-0.776	-0.706
ATP8B1	-1.7909	-2.114	-0.606	-1.7809	-2.6529	-2.5995	-1.9942	-0.4961	-0.9296	-1.4422	-1.1172	-1.1078	-1.3111	-1.3585	-2.1649	-1.5479	-0.2969	-0.0619	-2.2176	-1.3437	-0.6804	-1.1584	-1.9828	-1.2009	-1.2413	-1.0559	-1.8678	-1.873	-1.415	-0.1156	-1.7226	0.0841	-1.6804	-1.8783	-2.4422	-1.1016	-1.6038	-3.5064	-1.4699	-2.5228	-1.3255	-1.2653	-1.7612	-3.2243	-0.6897	-1.3808	0.1124	-2.9885	-1.8262
RAB27B	0.1283	-0.1697	-0.4739	-0.3733	-0.7037	-0.304	0.5099	2.381	-1.8314	0.719	-0.1472	-0.8757	0.3265	-0.2109	0.3033	-1.3846	1.4683	-1.527	-0.3771	0.1801	-0.2533	-3.2515	-0.9914	-1.7037	-1.2379	1.4281	0.3311	1.5306	-1.7084	1.216	-0.2176	-0.3808	-1.2619	-2.9324	-1.2793	-1.1844	-0.5606	-0.699	-0.013	0.8576	0.127	2.3366	1.2234	-0.8314	-1.3884	1.5281	0.9464	1.3086	0.1596
SERPINB12	NA	NA	NA	NA	NA	NA	NA	NA	NA	NA	NA	NA	NA	NA	NA	NA	NA	NA	0.6906	NA	NA	NA	NA	NA	NA	NA	NA	NA	-0.8186	NA	0.547	NA	0	NA	NA	NA	NA	NA	-0.7442	NA	NA	NA	0.0676	NA	NA	NA	NA	NA	NA
SNRPD1	-1.5479	-2.0233	-1.4779	-1.3771	-0.8599	-1.304	-1.4659	-1.5606	-1.1016	-1.4901	-1.8417	-0.5374	-0.2969	-1.6529	-1.5522	-1.1811	-1.4739	-1.1649	-1.3696	-1.1552	-2.114	-1.7563	0.0014	-1.7418	-1.3004	-0.417	-0.55	-1.454	-1.0439	-1.5778	-1.0862	-0.8783	-1.7909	-2.3511	-1.7274	-1.5312	-1.3437	-0.9743	-1.4901	-1.191	-1.0174	-0.3022	-1.3328	-1.8783	-1.662	-0.9574	-1.3696	-0.7984	-0.9799
ETFB	-0.6038	-0.417	-1.0499	-0.692	-0.221	-1.0831	-0.8494	-0.2498	-1.074	-0.3921	-0.3076	-0.9885	0.0356	-0.692	-0.6574	-0.0985	-0.3437	-1.0529	-0.1697	-0.1828	-0.6038	-1.0174	-0.8391	-0.5543	-0.173	-0.8135	-1.685	-0.2951	-1.0469	0.3185	-1.3474	-0.0291	-0.2379	-0.5043	-0.2584	-1.0203	-0.5799	-0.0985	-0.2009	-0.5585	-0.3419	-0.2934	-0.7131	-0.4639	-0.6597	-0.1828	-1.1424	-0.6506	-0.4679
PPP2R1A	-1.0087	-1.1844	-0.9546	-1.077	-1.3004	-1.1172	-1.2413	-1.1844	-1.3733	-1.4035	-1.1424	-0.9024	-1.2688	-1.1329	-1.152	-1.0954	-0.8757	-1.816	-1.4383	-1.4266	-1.4228	-1.6712	-0.8494	-1.2793	-1.6897	-1.462	-1.8365	-1.3437	-1.5995	-0.897	-2.041	-1.7859	-1.0801	-0.9351	-1.5864	-0.963	-0.6038	-1.1329	-1.304	-1.3548	-1.3255	-1.2969	-1.6943	-1.0801	-1.0203	-0.567	-1.9434	-1.6304	-1.5437
ZFP28	-1.2969	-1.0029	-0.2881	-0.9942	-1.1297	-3.2515	-1.3696	-2.2793	0.3161	-1.662	-1.0589	-1.9546	-1.1617	-1.7322	-1.1779	-3.1203	-0.1001	-1.454	-3.9083	-1.3364	-2.0649	-0.8417	0.875	-1.3364	-0.5332	-0.5437	-1.1649	-1.7274	-0.2328	-1.776	-1.6126	-0.749	-1.1016	-0.9743	-1.7037	-0.5228	-0.9799	-1.4228	-1.9771	-1.8836	-1.9602	-0.8625	-2.1976	-2.8573	-0.7013	-3.1078	-1.152	-1.6171	-1.1943
ZNF324	-0.394	-0.1746	-0.7298	-0.2328	-0.5084	-0.4961	0.2869	-0.1714	0.2339	-0.2076	-0.3884	0.0813	0.2928	-0.2671	-0.5543	0.115	-0.2498	-0.3884	-0.2898	-0.2311	-0.0634	-0.3255	0.5888	-0.1828	-0.484	-0.699	-0.889	-0.1234	-0.2076	0.0272	-1.074	-0.4442	-0.1345	0.5281	0.301	0.2327	0.0144	0.099	0.0772	-0.6038	-0.3147	-0.4521	-0.8599	-0.0755	0.4114	-0.0634	-1.041	-0.7108	-0.6597
ZNF586	-0.125	-0.2243	-0.1488	-0.4228	-0.5821	-0.9658	-0.8997	-0.5312	0.5821	-0.0816	-0.6552	-0.5799	-0.8757	-0.243	-0.873	-0.6781	0.1506	-0.077	-0.9885	-0.6349	-0.1408	-0.9771	1.0559	-0.4422	-0.2969	0.099	-0.8757	-0.3696	-0.4403	-0.1361	-0.8468	-0.173	0.5089	-0.4501	-0.364	-0.0985	-0.2636	-0.4112	-0.2567	-0.4679	0.0072	-0.2723	0.5008	-0.5479	-0.3094	-0.0439	0.1309	-0.3346	-0.3383
ERCC1	-0.9942	-0.6758	-0.8365	-1.2009	-1.737	-0.3585	-0.811	-1.1779	-1.0469	-1.1811	-0.7563	-0.6371	-0.7588	-0.3419	-0.9658	-1.3846	-1.0439	-1.1844	-0.6873	-1.0174	-0.8186	-0.5353	-0.949	-1.1329	-1.1203	-1.1361	-1.071	-1.0801	-1.3364	-1.0029	-1.685	-1.0499	-0.7588	-0.9269	-0.8625	-1.1456	-0.3511	-0.9743	-0.6506	-1.4422	-1.0801	-0.816	-1.2898	-0.9351	-0.9462	-0.2706	-1.5864	-1.1329	-1.1047
MARK4	-0.2226	-0.2026	-0.5522	-0.125	-0.2294	0.1401	0.148	-0.1861	-1.3328	-0.9462	-0.1408	-0.1681	-0.1943	0.5341	0.224	0.6508	-0.5628	-0.6416	0.1243	-0.2533	-0.2362	-0.0425	0.7476	-0.5821	-1.4035	0.0922	-0.2619	-0.3921	-0.706	-0.5395	-0.3183	-0.6643	-0.5479	-0.3978	-0.1993	-0.3827	-0.0589	-0.0634	-0.1795	-0.7346	-0.3022	-0.3419	-0.4481	-0.3183	-0.304	-0.1568	-0.1828	-0.4344	-0.3456
ZNF228	0.4457	-0.5756	0.338	-0.0101	0.0922	-0.0425	0.6544	0.1583	-0.7539	-0.0679	0.2473	0.474	0.5529	0.518	-0.5864	-0.7084	-0.1926	-0.482	0.4885	-0.3902	0.3528	0.2546	0.7991	0.2104	-0.3401	0.4362	0.0663	0.355	0.1776	-0.48	-1.038	0.2166	0.8065	-0.7013	0.099	-0.3273	-0.2916	-0.3292	-0.2533	-1.0893	0.512	0.8496	-0.7226	-0.2671	0	1.0949	0.3763	0.3357	0.4319
CD79A	0.6211	0.5341	0.0813	0.3573	0.4605	0.4531	1.0718	0.9501	0.0482	0.4103	0.1283	0.4854	0.5271	1.1388	0.6041	1.168	-0.5543	0.0854	0.3138	0.6627	0.5772	1.2963	0.4415	0.0649	0.2339	0.6526	0.605	0.3426	0.6154	-0.1062	0.5588	-0.5084	-0.0291	0.3818	0.8544	0.1674	0.5965	0.4906	0.4168	0.6351	0.5965	0.4158	0.5695	0.546	0.24	0.2449	-0.662	0.7207	0.0215
EDG8	-3.0233	-3.0954	-3.0116	-1.8625	-3.3733	-0.2176	-3.035	-2.458	-0.9296	-2.191	-3.2243	-2.776	-1.8059	-1.9159	-2.776	-3.071	-1.4074	-2.1329	-2.3364	-2.2176	-3.5769	-1.7466	-1.0619	-3.422	-1.737	-2.2243	-2.4035	-3.5769	-2.1203	-2.5146	-2.2584	-2.8365	-3	-4.3452	-1.9105	-3.0954	-2.2109	-2.1078	-3.6712	-2.2723	-2.9658	0.2869	-3.2243	-2.5995	-2.5479	-0.9462	-1.7859	-0.2916	-0.9743
ZNF266	0.2029	-0.0649	-0.0831	-0.097	0.1852	0.6608	0.3173	0.1865	0.4594	-0.1361	-0.1568	0.1674	0.1532	0.5898	0.7732	0.434	0.2558	0.0229	0.1322	0.9464	0.3357	-0.1861	0.6708	-0.173	1.0014	0.5782	0.1506	-0.6897	0.8098	0.1454	-0.1665	-0.2636	0.7732	0.3448	0.7329	0.294	0.0676	1.4425	-0.0425	-0.2009	0.7225	1.1197	0.6351	0	0.058	0.5519	-0.4305	0.7698	1.1519
MDAC1	0.84	1.9126	1.7321	2.7198	1.8953	-0.0233	3.4463	1.4683	2.2345	3.216	-0.0262	0.3391	0.4895	0.2363	2.8442	1.996	1.5583	1.636	3.3896	0.1928	0.2351	0.4573	1.5074	0.3907	3.851	1.8992	0.6471	0.5509	0.9389	1.9609	1.5622	2.0868	1.9731	0.0186	2.8916	-0.0101	1.8789	3.7071	0.1865	-0.1779	0.2726	3.5447	1.8476	3.3547	0.6164	-0.4383	0.3092	3.2787	2.107
FLJ10241	-0.8783	-0.9296	-0.9105	-1.1877	-0.963	-1.3004	-0.816	-1.0862	-1.1172	-0.692	-0.8625	-0.9132	-0.7346	-0.5735	-1.0116	-1.0203	-0.8573	-1.3183	-0.6758	-0.9942	-0.5799	-0.5353	-0.3147	-0.6967	-0.6148	-0.7884	-0.6552	-1.0058	-0.9546	-0.699	-1.4779	-0.5951	-0.6643	-0.7108	-0.8314	-0.5735	-0.6326	-0.8314	-0.9024	-0.9024	-1.3292	-0.7859	-1.4344	-0.4422	-0.6326	-0.4521	-1.3076	-1.3474	-1.0262
C19orf44	-0.3771	-0.2109	-0.125	0.2881	0.2987	-0.0247	0.3185	0.4222	-0.16	0.1878	0.3595	-0.1094	0.6835	0.1966	0.115	1.1043	-0.3659	-0.55	0.6654	0.2762	0.1057	-0.0649	0.338	0.5878	0.1966	-0.1649	-0.8186	0.1164	-0.0985	-0.2294	-0.527	-0.0908	0.1852	0.9107	0.9358	0.3674	0.4647	0.7621	-0.0908	-0.3147	-0.0365	0.3346	0.1506	0.8703	0.9169	0.6443	-0.1016	0.7698	-0.4422
LILRA5	2.9073	0.4563	0.774	2.4903	0.3369	1.067	1.4808	1.8492	1.4044	2.852	1.0545	1.6365	1.992	1.326	3.3799	0.1903	1.7698	2.0419	0.7459	1.5003	0.585	1.1878	NA	2.5502	2.4647	-2.458	0.54	1.1043	0.3369	1.1789	1.3329	NA	0.037	NA	1.9034	2.2699	2.201	1.6126	1.7887	2.6211	1.4808	1.3277	1.7455	1.797	1.8817	0.6862	NA	1.9771	2.1814
VTI1A	0.6581	0.4761	-0.4286	0.1674	0.0496	0.0072	0.0607	0.4626	0.3277	-0.013	-0.0634	0.4875	0.2678	0.6351	0.9568	1.0215	-0.1714	0.6182	0.4936	0.7891	0.3022	0.3573	0.1467	-0.1536	0.1467	0.472	1.2154	0.419	0.5089	0.3103	1.3016	-0.077	-0.2109	-1.0499	0.269	-0.3585	0.184	0.679	0.3311	0.3231	0.9268	0.4201	0.2845	-0.1109	0.0759	-0.2775	1.4494	0.6826	0.7172
FLJ14768	-0.114	0.127	-0.2226	0.2166	-0.1552	0.1375	0.2141	-0.0484	0.103	-0.6689	0.0129	0.4926	0.0635	0.0129	-0.2413	0.3863	-0.4325	-0.4719	-0.0425	-0.0484	-0.0087	-0.567	0.6853	-0.3474	-1.0029	-0.4481	-0.725	-0.1779	-0.4364	-0.226	-0.8237	-0.4403	-0.0336	0.0552	-0.2969	0.1852	0.1852	0.1375	-0.2026	-0.3401	-0.3771	-0.3022	-0.7934	0.0058	0.1124	0.2845	-0.3437	-0.2567	-0.4383
ZNF563	0.6452	-0.0218	0.4751	-0.1266	0.0229	-1.6666	0.4425	-0.0514	1.1237	0.6031	0.2191	-0.5522	-1.1392	-1.699	-0.9914	-2.7859	1.3237	0.4233	0.4792	-0.6215	0.7545	0.1467	-1.7179	0.7732	1.4147	0.5018	0.5993	0.6581	0.5965	1.1814	2.0025	0.9061	1.9859	1.4885	1.103	0.9848	-0.1993	-0.4442	0.2253	-0.7934	1.3573	1.0929	1.117	0.2079	0.1699	1.9968	2.5445	-0.3997	-0.1649
YIPF2	0.5578	0.4457	0.5079	0.0552	-0.1959	-0.0321	0.3863	0.3718	0.4636	-0.1568	0.6164	0.229	0.3606	0.2004	0.2203	0.3951	0.5568	0.2041	-0.243	-0.2898	0.5231	0.3707	0.3618	0.0663	0.7723	0.2998	-0.3921	0.1865	-0.0262	0.6808	0.3426	0.03	0.5049	0.6378	0.2762	1.0186	0.4404	0.0552	0.224	-0.1424	0.2216	0.0101	0.1467	0.2786	0.4103	0.8213	0.0607	0.0014	-0.1697
KLK10	-0.3364	1.8294	-2.9324	-1.2481	1.0731	-4.2681	-0.9159	4.1627	2.1998	1.1808	-2.699	1.1814	-2.1976	2.2274	0.2179	5.5053	2.3431	0.1164	-2.0058	1.8074	-2.7859	5.8255	-3.0831	0.8953	1.5617	-3.9817	-0.5332	-1.5395	1.2928	3.9672	1.3802	0.3471	-1.1714	2.6987	-0.1697	-0.2793	0.6996	0.6969	-1.1047	-2.191	-2.8997	2.0036	0.8695	1.3511	0.2857	-1.5522	3.1848	-1.2345	2.0419
VRK3	-0.2193	-0.6304	-0.4442	-0.9885	-0.9241	-0.9914	-1.077	-0.1746	-0.5166	-1.0029	-0.152	-0.8916	-0.4074	-0.8651	-1.152	-1.1392	-0.173	-0.7179	-0.9187	-1.7226	-0.6484	-1.5187	-1.2653	-0.5973	-0.7686	-1.2447	-0.7959	-0.5821	-0.8468	-0.0831	-1.6529	-1.5649	-0.226	-1.1877	-0.8059	-1.2584	-0.8943	-0.963	-0.3346	-0.699	-0.0203	-0.6529	-1.5564	-0.4364	-0.8546	-0.3292	-0.9743	-1.699	-0.8704
ZNF473	-0.6597	-1.811	-1.041	-1.5735	-1.5864	-1.3846	-0.737	-1.4501	-1.1297	-1.6038	-1.6126	-0.6873	-0.5228	-1.3511	-1.462	-1.3959	-1.0679	-1.5735	-1.1424	-1.8625	-1.4982	-1.5995	-0.3511	-1.2345	-1.6943	-0.304	-1.1488	-1.527	-1.3808	-1.6804	-1.4699	-1.8997	-1.3997	-0.6552	-1.2311	-1.3585	-1.1844	-0.3273	-0.6943	-1.5564	-0.7394	-0.7809	-1.2311	-0.6943	-1.0203	-0.456	-1.1361	-1.4422	-1.0233
NOSIP	-0.6259	-0.7202	-1.035	-0.6148	-1.0893	-0.8262	-0.5606	-0.488	-0.8262	-0.706	-0.7934	-0.2793	0.0663	-0.7298	-0.4982	-0.7084	-0.7784	-0.6282	-0.8211	-0.7515	-0.5585	-1.0469	0.3103	-0.6304	-0.8863	-0.6282	-1.1976	-0.7686	-0.9051	-0.152	-1.3997	-1.114	-0.816	-0.9434	-0.191	-0.8757	-0.1976	-0.3511	-0.6126	-0.8135	-0.5353	-0.4901	-1.0233	-0.4035	-0.1993	-0.1877	-1.2793	-1.0439	-0.5023
FUT1	-2.0649	-1.1746	-0.5799	-1.1297	-0.0725	-3.1844	-1.4901	-0.2584	-1.2584	-0.4461	-0.2951	-1.9771	0.1349	-1.1877	-1.5907	-1.5864	0.0043	-1.6574	-0.3183	-0.6781	-2.8678	-1.9434	0.8065	0.3606	-1.6082	-0.2042	0.7119	-0.8468	-1.6529	-1.4266	-0.9078	-0.0101	0.1827	0.4049	-0.2653	-0.3529	-1.6082	-0.255	-0.4739	-0.1109	-0.685	-0.7539	-0.9105	-0.2706	0.3829	-1.4266	0.2104	-1.7131	-1.6897
FUT2	2.16	3.3618	3.591	2.1382	2.791	3.184	0.9709	4.0435	2.6371	1.1427	2.6395	3.7004	3.3058	1.893	1.346	4.8364	3.2496	3.546	0.8512	1.1512	3.9523	3.2347	1.6875	1.9964	2.3271	1.8082	1.1603	2.6204	1.7446	3.8227	2.9313	3.6334	3.2566	3.0619	0.745	2.9011	1.7416	2.308	2.6998	3.7452	3.0444	3.226	2.6422	2.8057	3.1275	1.2839	2.9819	2.236	0.8552
CNP	-1.1779	-1.889	-1.4112	-1.5187	-2.1584	-1.2379	-2.458	-2.3437	-1.0893	-1.9885	-1.527	-0.9885	-1.4305	-2.0174	-2.4422	-1.8009	-0.852	-1.2142	-2.0649	-2.1266	-1.5395	-1.6215	-3.1844	-2.035	-1.9105	-1.811	-1.3808	-1.5564	-1.8211	-1.2863	-1.5395	-2.5479	-1.3959	-2.3808	-0.6781	-1.5995	-1.2481	-1.7322	-1.852	-1.852	-1.4112	-1.3846	-1.8059	-1.3696	-1.9269	-0.1828	-1.5522	-2.114	-2.2176
SULT2B1	0.4297	-0.9942	-2	-2.4501	-2.6259	1.8242	-2.9214	-1.8573	-1.5864	-0.2723	-2.5064	-0.5649	-0.7418	0.3448	-1.3733	1.5306	-0.0985	-0.9885	-0.4266	-2.4112	-0.4228	-3.0589	-0.7909	0.2987	0.5695	-0.692	0.4297	-1.6484	-2.2042	-0.9214	-3.4235	-1.1649	-0.8314	-3.035	-1.949	-1.3183	-0.4093	-1.7466	-1.2584	1.346	0.4688	-0.0604	-3.4517	-1.8314	-1.5821	-1.2142	0.3185	-1.6574	-0.8943
TMEM160	-0.6148	-0.2533	0.0215	-0.074	-0.2226	0.0813	-0.0664	0.1928	-0.6237	-0.1392	0.1322	0.0086	0.2473	0.0594	0.2412	0.8647	-0.1203	-0.6082	0.1991	0.1941	-0.1993	-0.458	0.8552	-0.3219	-0.6171	0.3323	0.144	-0.3902	-0.394	0.1801	-0.191	-0.6529	-0.2758	-0.5437	0.3674	-0.4779	0.8703	0.6304	-0.0277	-0.0101	0.1776	0	0.0058	0.4351	-0.0499	0.107	-0.3437	-0.1313	-0.1943
ZNF146	-0.8916	-1.3292	-0.6038	-0.6126	-1.0954	-0.6282	-1.1203	-1.7959	-0.6897	-1.0679	-1.3808	-0.7735	-0.8678	-1.2042	-1.9885	-2.1976	-0.1993	0.4947	-1.0954	-1.3959	-0.9914	-0.6193	0.5069	-1.4461	0.546	-0.2092	-0.5692	-1.1844	0.7066	-1.6666	-0.1329	-1.2243	-0.9241	-0.9885	-1.1649	-0.5778	-1.1943	-1.2277	-1.2009	-1.6897	-1.2009	-0.5105	-1.7612	-0.9105	-0.9518	-0.5886	-0.7909	0.0426	-0.8678
NCR1	3.8885	0.5069	-0.8237	1.614	0.5695	1.9486	2.3153	2.2937	0.8568	1.8584	0.0043	1.7954	1.3431	3.4316	1.9829	2.4641	0.5627	4.1977	NA	0.7765	1.3685	1.9638	NA	NA	1.123	2.0264	5.4192	NA	2.0079	0.54	2.6668	1.9294	NA	NA	1.9157	0.1454	NA	2.4011	0.5321	3.5072	2.4576	1.1903	1.1789	NA	NA	2.8846	0.5578	1.3156	2.1124
TMEM86B	0.1057	-0.5125	-0.6461	0.1427	-1.0649	-0.7346	0.3323	-0.1844	-1.1746	0.2079	0.4772	-0.4055	0.2203	0.0072	-0.2176	0.745	-0.173	0.0072	-0.2277	0.4158	0.0072	-0.3659	0.3127	-0.3058	-0.1376	-0.0203	-0.4266	-0.699	0.1596	0.1375	-1.2863	0.2904	-0.2602	0.6772	0.3346	-0.1536	0.189	0.373	-0.3292	-0.016	-0.3022	-0.3111	-0.1424	-0.0029	0.2016	0.544	-0.6943	-0.2619	-0.816
LGALS7	-1.4941	0.3707	0.1084	-0.7346	-1.3548	-1.4189	-1.221	-0.5332	2.6164	-0.7834	-1.3696	2.3057	-1.3921	2.3741	-0.6758	0.7924	-1.3364	-0.1568	-1.4461	0.0745	-1.5105	-0.3978	0.6098	-0.0923	-0.3456	0.0854	-3.0954	-0.9714	1.5797	-1.5023	1.1473	-0.706	-2.5995	-1.6304	-1.0233	0.8836	0.4823	-0.7959	-1.8678	-1.5312	-0.9462	2.4607	-0.9828	1.8476	-1.8783	-1.5778	0.7715	-0.6082	0.8703
SLC7A10	2.1322	1.412	5.0126	2.4054	2.146	0.8528	2.5967	-1.6349	-0.4779	1.3208	-0.4344	-0.6461	2.1424	3.8248	2.0204	-0.0247	4.3147	1.3907	4.6859	2.1528	NA	2.7604	6.2102	1.6862	3.8319	2	5.7525	1.6149	5.4748	0.1878	NA	1.2253	0.099	1.4875	3.6404	3.6288	0.2277	3.0695	2.3937	-1.1172	1.1789	-0.2498	1.3098	0.5089	2.9613	-1.3585	1.5064	1.0391	2.7729
CREB3L3	-1.5821	-3.2109	-1.0087	-2.2515	-2.4982	-3.7389	-3.8531	2.8602	-3.4933	-3.9258	0.044	-3.4564	-1.9379	-1.7084	-3.1456	1.5099	-1.7612	-2.9324	-2.7466	-3.5412	-2.9885	-2.8573	-2.0893	-3.4804	-2.8059	-3.0831	-3.6475	-3.2243	-2.1078	2.2345	-2.7084	-1.662	-2.2584	-3.1584	-1.7563	-3.1714	-2.5064	-2.2042	-2.6171	-1.041	-1.9434	-3.2793	-0.3401	-2.5564	-3.3838	-1.1844	-2.889	-2.114	-2.2042
ZNF223	0.2327	-0.4383	-0.1376	-0.5023	0.0538	0.1309	-0.2498	-0.3292	0.7031	0.1865	-0.488	-0.0469	1.1316	0.538	-1.0589	-0.6804	0.7251	-0.1844	-0.5628	-0.8211	0.4005	0.1164	0.4573	-0.0985	1.0029	0.2116	0.4782	-0.2898	0.4584	0.7974	-0.4461	-0.1472	0.6672	-0.6897	-0.488	0.8115	0.2798	-0.255	-0.3058	-0.1456	0.2277	-0.0985	-0.2362	-0.0985	0.5898	0.4049	-0.0862	-1.1424	-0.035
AP3D1	0.33	-0.1078	-0.1078	0.3173	0.4531	-0.1187	0.0552	-0.2464	-0.0247	-0.5125	-0.2076	0.0976	0.308	-0.1861	-0.3827	0.0621	0.583	-0.5166	0.1991	0.3584	0.0482	-0.0893	-0.5973	-0.5564	0.3685	-0.2584	0.2016	0.1506	0.2857	-0.2311	-0.226	0.1427	-0.3255	0.6987	-0.5312	-0.0454	-0.0816	0.3196	-0.016	0.0229	-0.0589	0.1928	0.1043	-0.1943	0.1375	-0.5187	0.2762	-0.2653	0.1953
GAMT	-1.2176	-1.304	-1.1779	-2.4035	-1.7226	-2.4189	-1.811	-2.3511	-1.304	-1.5778	-2.816	-3.1203	-1.2584	-1.8943	-2.2934	-2.816	-2.4982	-1.8625	-0.2413	-2.1329	-1.1943	-2.0529	-0.3058	-0.9574	-2.3884	-0.9686	-2.1203	-1.8625	-1.9546	-2.3959	-2.1078	-1.7612	-0.725	-0.1062	-1.0439	-2.2723	-0.8546	-0.3237	-0.6873	-2.7179	-1.1811	-1.3808	-1.1203	-2.6082	-1.0831	0.2376	-1.191	-1.6082	-1.5479
PUM1	0.127	0.3929	0.3208	0.605	0.5529	0.4936	0.818	0.2363	0.9336	0.3528	0.263	0.1609	0.2363	0.2116	0.1801	0.0286	0.5479	0.315	0.2642	0.472	0.3334	0.2726	0.0868	0.3595	0.6471	0.3391	0.3718	0.2079	0.6295	0.3929	0.0468	0.9723	0.4678	0.6211	0.3707	0.3763	0.0854	0.3674	0.1257	-0.2533	0.33	0.3663	0.4803	0.6332	0.5936	0.3561	0.7698	0.6645	0.1084
TJP3	0.5656	1.3488	1.1204	-0.125	0.3651	0.9321	0.3896	1.787	1.6817	0.4647	0.4875	1.1197	0.5261	0.6201	-0.9214	1.6164	0.6889	1.4735	0.1725	-0.9214	1.5743	0.9419	-0.737	0.7621	0.4027	-0.55	-0.4208	0.3426	-0.1894	1.5965	-0.9214	1.0165	1.1276	1.5787	-0.1376	0.1827	0.7031	0.2277	1.0976	0.984	0.6736	-0.3273	1.0201	1.082	0.5291	1.251	0.301	-0.6237	-1.5821
PSG6	-6.6439	-6.6439	-6.6439	-6.6439	-6.3688	-6.6153	-5.5735	-5.9931	-6.6439	-6.6439	-5.7799	-6.6439	-6.0303	-5.8448	-5.7103	-6.2324	-6.0783	-6.6439	-5.4051	-6.6439	-6.6439	-5.8614	-1.8365	-6.6439	-5.3219	-6.4051	-6.6439	-6.6439	-6.6439	-6.4548	-1.3997	-6.1897	-6.0493	-6.2216	-4.3959	-6.6439	-5.6953	-6.6439	-6.4297	-6.1688	-6.6439	-4.4081	-4.6082	-2.3437	-6.3452	-5.1128	-5.8039	-6.0589	-6.4548
GRIN3B	-0.3419	-0.48	-0.7394	NA	NA	-2.6897	-0.2636	-1.1746	-1.6259	0.1217	-1.4383	-0.4739	-0.2243	-1.2277	-0.8468	-0.1456	1.4457	-0.2345	-0.1746	-0.8135	-1.3771	0.6608	0.9486	0.2066	-0.0544	1.4552	-0.7661	-0.685	NA	-1.4779	-0.3921	-0.1472	0.1164	NA	1.0656	-1.5395	-0.6666	-0.2567	0.6088	-1.5312	-0.0544	-0.013	NA	-0.5187	-0.2277	2.0875	1.0328	-0.8494	-0.8651
RAB3A	-2.3808	-2.4344	-2.0893	-3.4884	-2.737	-2.6171	-2.7084	-1.5105	-2.7859	-2.7661	-2.737	-2.0174	-2.7859	-2.5228	-2.8365	-1.9434	-2.114	-2.9546	-2.2863	-3.4612	-1.5951	-2.6529	-0.3696	-3.4612	-3.3778	-2	-2.8997	-2.1078	-3.5328	-2.9771	-2.9434	-1.776	-1.4189	-0.9914	-2.5564	-2.458	-2.0893	-2.7959	-1.9658	-2.4659	-2.6897	-2.6712	-2.2042	-2.8573	-2.4982	-2.2243	-2.1584	-2.8573	-2.889
FXYD1	1.516	3.2777	1.7879	1.8945	1.4808	0.7225	3.0907	3.6473	3.3349	4.7745	3.0204	0.9268	1.1909	2.3083	3.1311	2.0694	2.2116	1.736	0.5089	2.3331	1.5553	2.3879	NA	2.91	1.7398	0.5714	2.1177	2.3144	2.1411	3.0512	0.6617	0.0922	2.3885	0.2714	4.257	3.3477	2.8363	2.6738	2.0724	0.9598	1.4265	1.7837	3.3349	3.7655	3.8319	NA	1.754	NA	1.5768
TSSK6	-0.897	-0.7612	-0.3808	-1.1976	-0.0985	-0.852	-1.2863	-0.5649	-0.9942	-2.2793	-1.1617	-0.415	-1.0923	0.659	-1.1746	-0.8186	0.0813	-1.771	-1.3111	-1.9828	-0.3328	-0.243	-0.1219	NA	-1.3474	-1.0174	NA	-0.6484	-0.4074	1.0426	0.0963	-2.0116	0.0172	0.514	-1.5353	-1.5564	-1.2311	-0.881	-1.3921	-0.1361	-1.3659	-0.8443	-1.1552	-0.7013	0.1349	-0.2396	-0.0725	-0.9379	-1.771
COX6B1	-0.3492	-0.737	-0.8237	-0.2126	-0.771	-0.2775	-0.3058	-0.4501	-0.5043	-0.7274	-0.3383	-0.1376	0.2179	-0.0954	-0.3603	0.1532	0.4372	1.6215	-0.4208	-0.5886	-0.9686	-0.3548	-0.016	-1.0559	-0.456	-0.0619	-0.3492	-0.6259	0.541	-0.662	-0.3622	-0.8262	-0.8084	-0.685	-0.6193	-0.6439	-0.2142	-0.0877	-0.7298	-0.3183	-0.2193	0.3584	-0.7108	-0.6552	-0.5023	-0.2828	-0.6082	0.6636	-0.1617
OR7C2	1.8832	1.7146	2.8502	2.6443	2.4103	1.8412	1.8817	0.5945	1.2079	1.4082	1.84	1.1833	2.3948	1.8895	1.257	3.0654	0.7119	2.4263	2.0482	2.2163	2.3417	-0.2706	2.4222	2.4168	1.1661	1.0983	1.1486	1.4983	1.5524	1.8726	1.5094	2.2534	2.024	1.1725	2.0384	1.7242	2.3237	3.0428	2.0388	1.237	0.545	0.9906	1.0043	1.4484	1.3623	-0.2009	2.0542	1.517	1.3283
CYP4F12	0.4027	-2.5228	-4.776	-4.7331	-4.2379	-4.4643	-2.2584	0.7638	0.2253	-2.2379	-1.4501	-4.7103	-1.6259	-2.662	-3.4884	0.4875	-4.6188	-3.7389	-5.5598	-4.402	-0.8704	-1.0203	-4.1329	-3.9794	-2.6897	-3.5718	-4.8283	-3.8019	-2.699	1.5898	-4.3104	-1.6394	-3.1714	-1.4305	-3.8468	-0.5291	-4.3047	-2.0233	-1.2969	0.7757	-1.3111	-0.9269	-1.8262	-3.0954	-3.1976	-4.0979	-1.7612	-4.0093	-4.8741
PPAP2C	-0.2845	1.105	-0.1062	-1.1234	-1.3808	-1.486	-0.3566	0.0976	0.6498	-0.3511	-1.5312	0.8797	-0.7037	-1.6897	-1.7563	-0.776	0.472	-0.7131	-1.3364	-1.7959	1.355	-1.9324	-0.3474	-0.1329	-0.4941	-0.7859	-2.5649	-0.1234	-1.0499	0.308	-3.2243	0.5028	-0.9658	-0.7809	-0.852	-1.035	0.0868	-0.2881	-1.5023	-0.6804	-0.7686	0.1699	-0.8783	0.5548	0.2666	-0.1584	-0.8997	-0.8288	-1.7859
GJA4	4.292	3.7027	4.1235	4.0268	4.5814	4.9841	3.5509	4.9855	4.4886	5.1424	4.6622	5.0492	3.4828	4.319	3.844	3.6758	4.7517	4.3169	4.7312	4.995	2.7843	4.4679	3.037	4.591	4.6479	5.7233	4.8099	4.7495	3.857	5.0117	4.5826	3.6147	4.218	3.6542	5.4033	4.8495	5.3501	3.6005	4.3533	4.0798	4.126	5.4253	4.9117	4.7808	4.7425	4.4718	6.0248	4.1579	5.1123
NDUFA7	-0.1376	-0.4639	-0.5864	-0.5166	-0.3201	-0.3328	-0.1125	-0.1062	-0.4093	-0.1504	-0.0291	-0.2969	-0.2793	-0.6506	-0.3997	0.175	-0.3165	-0.0862	0.5211	-0.5799	-0.4383	-0.2481	-0.9296	-0.2277	0.0356	0.0029	0.5763	0.0868	-0.3129	-0.1795	-0.1746	0.3138	-0.0985	0.3138	-0.5291	-0.8757	-0.3865	0.111	-0.0801	0.2154	0.1362	-0.0116	-0.243	-0.3273	-0.4521	-0.1681	-0.1488	-0.5628	-0.2328
ADAMTS10	-0.1172	0.3951	1.0405	-0.3474	-0.2688	-0.0514	0.4998	-0.5799	0.4688	0.1852	-0.0801	-0.3273	0.4351	-0.5713	0.4895	0.6663	-2.191	-0.1456	1	1.3741	1.3868	0.8359	0.1532	1.3757	-0.1424	0.8742	0.962	0.0029	1.2357	-0.4739	-0.7984	0.2497	-0.1877	0.2618	0.4792	0.123	0.5993	0.6229	-0.0725	0.7146	0.4615	0.0272	0.4071	0.8655	1.3956	0.4265	0.3068	1.1808	0.7999
NR2F6	-0.4131	-0.3978	-0.6827	-0.6897	-1.3076	-0.1633	-1.2481	-0.0755	-0.3529	-0.9856	-0.6304	-0.0277	-0.5522	-1.3585	-1.3696	-0.7037	-0.2934	-0.9269	-1.1392	-1.9051	-0.1746	-0.8059	-0.706	-0.6416	-0.5023	-0.0589	-1.8836	-1.071	-1.5951	-0.1714	-1.5821	-0.5332	-0.5312	-0.3622	-1.2934	-0.8443	-0.3237	-1.4228	-0.7155	-0.9105	-1.0831	-0.5821	-0.9574	-0.0801	-0.9051	-0.1926	-1.2758	-1.2243	-1.4461
SGTA	-0.5166	-0.5458	-1.0203	-0.7834	-0.8365	-0.7084	-0.3058	-0.5995	-0.4286	-0.5416	-0.5249	-0.3529	-0.3094	-0.5043	-0.5353	0.1204	-0.3548	-0.5374	-0.191	-0.4739	-0.5821	-0.484	-0.482	-0.7959	-0.4325	-0.3771	-0.9241	-0.699	-0.725	-0.4074	-1.2481	-0.692	-0.6827	-0.6193	-0.2688	-0.6506	-0.1345	-0.1266	-0.7202	-0.1078	-0.6439	-0.2362	-0.462	-0.3733	-0.4659	-0.0939	-1.1943	-0.5208	-0.6282
ZNF571	0.2951	-0.2126	0.1609	-0.0336	0.5018	0.2079	0.9023	-0.1361	0.4573	0.6636	0.5763	0.406	1.0614	0.2302	0.2116	-0.6712	1.2191	0.433	0.5008	-0.488	0.4362	0.6681	1.3635	0.394	1.1991	1.6982	1.2951	0.433	2.2179	-0.5249	0.257	0.5539	0.4179	0.1738	0.4233	0.4626	0.3929	0.5907	0.4709	-0.949	0.5955	1.2839	0.3277	0.8424	0.1467	1.0384	1.1388	0.2987	0.1712
THADA	-0.1016	-0.1345	-0.1861	-0.3383	0.1164	-0.5692	-0.0189	-0.1297	0.1941	-0.3622	-0.0862	0.127	-0.1617	-0.0439	-0.0544	-0.1504	0.2534	-0.6574	-0.3183	-0.527	0.1674	-0.3255	-0.1329	0.0058	0.0936	-0.5606	-1.3474	-0.5023	0.474	0.2594	-0.811	-0.7859	0.069	-0.0514	-0.1697	-0.071	0.1776	0.3185	-0.3529	-0.3566	-0.3076	-0.3529	-0.4921	-0.0725	0.0854	-0.0058	-0.5332	-0.3959	-0.3827
39327	-0.1746	-0.3585	-0.041	0.0158	0.0314	0.1467	0.1204	-0.0725	-0.1746	-0.6873	-0.4442	0.189	0.1204	-0.0679	-0.1297	-0.0499	-0.2126	-0.8365	0.1979	0.4813	-0.2793	0.3103	0.3528	-0.5458	-0.1234	0.058	-0.881	-0.1959	-0.2584	-0.5479	0.058	-0.6259	-0.662	-0.5332	-0.3474	-0.5735	0.4885	0.2104	-0.6394	-0.1633	-0.1488	-0.1031	-0.2142	0.1686	0.419	0.5859	-1.0203	0.1017	-0.0454
CENTG2	-1.1552	-0.2567	-0.1926	-0.7539	-0.0087	-0.3659	-0.3808	-0.7202	0.8528	-0.9462	-0.6804	-0.0877	-0.5002	-0.7612	-1.3884	-1.4344	0.6498	-0.7346	-0.725	-0.8443	-0.6148	-0.5146	-0.9714	-0.8836	-0.5312	-0.9024	-0.6104	-0.8494	-0.9024	-0.3585	-0.2413	-1.3585	-0.2881	0.0718	-1.2277	-0.699	-0.6735	-0.725	-0.1697	-2.3585	-1.2277	-0.8943	0.2558	-0.1568	0.3663	-0.3165	-0.9434	-0.8678	-1.0469
DARS	-0.3548	-0.7298	-0.6967	-0.5522	-0.6758	-0.2758	-0.3292	-1.1649	-0.0755	-1.0262	-0.9914	-0.5208	-0.7934	-0.4422	-0.7959	-1.2688	-0.3733	-0.6259	-0.6712	-0.6574	-0.7226	-0.692	-0.5125	-1.2969	0.4936	-0.3401	-0.2277	-0.2934	-0.3548	-0.692	-0.1552	-0.0072	-0.6552	-0.4659	-0.8863	-0.9132	-1.0649	-1.0262	-0.7346	-0.8468	-0.881	-0.8916	-1.0801	-1.5995	-0.9051	-1.2447	0.2786	-0.5735	-0.4461
C2orf31	0.0029	1.0349	0.9811	0.7251	2.286	-0.8339	1.4271	2.1664	0.9237	1.0222	2.4626	1.3901	0.4977	-0.2126	0.8303	1.6045	1.2981	-0.3328	2.1846	0.1966	1.3369	-0.5799	2.8976	2.1612	0.0029	1.4049	0.6295	1.5069	0.2762	1.9264	1.3879	-0.2277	1.8484	2.2141	0.301	1.3545	0.1712	1.7924	1.6799	-0.4344	1.6884	-0.2723	1.3179	2.2194	1.206	1.1124	0.719	0.0356	1.109
WDR35	-1.3884	-1.1877	-0.725	-1.3219	-0.2881	-1.482	-1.3808	-1.0619	0.0936	0.144	-1.5692	-1.1016	-2.1779	-1.6038	-1.4305	-1.776	-0.3548	-2.3585	-0.8836	-1.4344	-2.5564	-1.1681	-0.1408	-0.8625	0.2363	-0.9269	-1.1844	-1.9771	-0.1313	-0.8573	-1.3622	-0.1894	-1.7179	-0.5907	-2.8059	-1.5187	-0.8211	-0.1811	-1.9159	-1.3733	-1.3733	-1.4383	-1.9159	-0.8757	-1.7859	-0.949	-1.1392	-0.3383	-1.5735
MARS2	-2.4901	-1.0529	-2.2653	-2.1649	-0.9686	-2.2243	-3.2934	-3.5649	-0.9971	-1.1617	-2.4739	-2.8573	-2.8059	-2.7466	-3.3899	-2.4189	0.257	-2.8059	-2.8365	-2.6439	-1.737	-1.9105	-2.8059	-2.8262	0.2179	-1.1266	-1.6712	-2.5064	-1.7274	-1.2379	-2.0589	-0.3978	-1.2243	-0.3865	-1.816	-1.2723	-2.4422	-1.8625	-2.4501	-1.7037	-1.2142	-2.889	-2.041	-2.737	-2.8783	-0.5973	-1.0954	-1.2934	-1.816
EPHA4	0.8867	1.9561	2.0307	1.5003	1.9434	-1.7179	1.5539	1.7307	1.715	1.0697	1.5479	0.757	2.0405	2.0555	1.2314	-2.1203	2.3651	-0.897	1.6192	3.0303	1.0676	0.9184	-3.8059	1.2821	0.7338	3.0817	1.6821	2.4452	0.1124	2.2531	0.7181	1.0079	1.8785	0.472	0.852	2.3981	1.2104	2.0535	2.0707	-1.3846	1.8375	1.7945	1.0656	1.4615	2.3377	2.3898	1.1309	0.263	1.4834
STK16	-0.7959	-0.2969	-0.527	-0.3456	-0.1376	-0.606	-0.4189	-0.3383	-0.6371	-0.8494	-0.0439	-0.1763	-0.2619	-0.3201	-0.4325	-0.5064	-0.6215	0.3874	-0.035	-0.6416	0.3774	0.0594	-0.0559	-0.5437	-0.9051	0.1916	-1.454	0.2534	-1.2515	-0.364	-0.8546	-0.692	-0.074	0.315	0.037	0.127	-0.7226	0.3138	0.2702	-0.527	-0.1617	-0.3183	0.0868	0.2534	0.9486	0.2987	-1.0801	-0.2775	-0.3529
C2orf17	-0.2226	0.1852	0.4865	-0.2898	-0.0619	-1.0087	-0.0529	0.2314	-0.1172	0.4404	0.1941	-0.2636	-0.0559	-0.0908	0.0594	-0.6371	0.2363	-0.567	-0.1219	0.0243	0.4103	0.3807	-0.4521	0.739	-0.1172	0.0895	-0.3846	0.2166	0.123	0.0841	0.0772	0.3242	0.5734	0.2666	0.069	0.5361	-0.2828	0.394	0.1204	-0.3076	-0.1894	-0.5564	0.3471	0.6313	0.7502	0.4093	-0.5606	-0.2845	-0.1746
REGL	NA	NA	NA	NA	NA	NA	NA	NA	NA	NA	NA	NA	NA	NA	0.3907	NA	NA	NA	NA	NA	NA	NA	NA	NA	NA	NA	NA	NA	NA	NA	NA	NA	0.0058	NA	NA	NA	NA	NA	NA	NA	NA	NA	NA	NA	NA	NA	NA	-0.6126	NA
DDX1	-2.4501	-2.4901	-1.8943	-2.662	-2.191	-2.7179	-2.5564	-2.2934	-2.2042	-1.9885	-2.3959	-2.191	-2.2934	-2.6082	-2.3808	-2.1203	-2.3004	-2.0116	-2.776	-2.3511	-2.7084	-2.5312	-2.5564	-2.2042	-2.8678	-1.8836	-2.3147	-2.0589	-2.0116	-2.699	-2.2723	-2.2042	-2.3219	-2.4422	-2.3511	-2.5735	-2.2109	-2.4189	-2.2042	-2.3585	-2.0174	-1.7084	-1.873	-2.7084	-1.3846	-2.1016	-2.2042	-2.0291	-1.9214
B3GALT1	NA	-1.6712	-0.8009	NA	NA	NA	NA	-1.699	NA	NA	NA	NA	NA	NA	NA	NA	NA	NA	-1.776	NA	NA	NA	NA	NA	1.2382	NA	NA	NA	NA	NA	NA	-0.9351	0.0086	NA	NA	NA	NA	-1.1456	NA	NA	NA	NA	NA	NA	-1.9942	-0.5291	NA	NA	NA
PRKD3	-0.7418	-1.5312	-0.9828	-1.4228	-1.3328	-0.0365	-1.852	-1.6758	-1.152	-1.1392	-1.6349	-0.3401	-1.6038	-1.1943	-1.4344	-2.3959	-0.9856	0.0881	-2.2311	-1.6758	-1.7084	-1.1234	0.1217	-2.041	-1.4422	-0.3058	-0.3147	-1.5105	-0.1297	-1.5907	-0.2328	-1.3997	-2.0529	-2.041	-1.2109	-2.0893	-1.5692	-1.2619	-2.191	-1.6394	-0.488	-0.5479	-1.3771	-3.035	-1.3548	-2.1203	-1.1361	-0.2345	-0.8573
KIAA0692	-0.4305	-1.0985	-0.9942	-0.6193	-1.041	0.2066	-0.9379	-1.0649	-0.5886	-0.4461	-0.8059	-0.7588	-0.9105	-0.776	-0.8704	-0.3959	0.0909	-0.7418	-1.1424	-1.4305	-0.4719	-0.4035	-0.5886	-0.5799	0.0412	-1.0029	-0.8237	-0.8943	-0.6259	-0.1844	-0.4739	-1.304	-0.5084	-0.6804	-1.3733	0.2154	-0.3677	-1.0029	-1.1617	0.0356	0.0086	-0.484	-1.8059	-0.8678	-1.458	-0.8262	-0.5995	-0.3529	-0.46
PPP3R1	-0.2396	-1.5606	-0.7637	-0.415	-0.7394	-0.4208	-0.6666	-0.6827	-1.1584	-0.7735	0.4699	-1.0116	-1.8365	-1.1078	-0.5353	-0.0619	-1.3292	0.175	-0.6193	-1.6304	0.281	-1.8211	-0.454	-0.5713	-0.9743	-0.8186	0.1401	0.2963	-0.6259	-0.527	-0.3846	-1.6712	-1.4461	-1.2481	-1.4383	-1.2142	-0.2328	-0.4521	-0.0247	-0.4305	0.1414	-0.2481	0.1362	-1.3511	-0.152	-0.7442	-0.0233	-0.5084	0.1903
FLJ14668	-0.9105	-1.2584	-1.0529	-0.6781	-0.6148	-0.3622	-0.897	-1.4422	-1.486	-1.1203	-0.7084	-0.776	-0.8034	-0.9187	-1.1714	-0.5628	-1.2009	-0.5543	-0.486	-0.7959	-0.3997	-1.0233	0.0881	-1.0923	-1.1488	0.0745	-0.0514	-0.5886	-0.2345	-1.7809	-0.4364	-0.7037	-1.0893	0.03	-1.1172	-0.9743	-1.2723	-0.5395	-0.8468	-0.0058	-1.0116	-0.6038	-1.0679	-1.8262	-0.16	-1.1552	-0.3585	-0.488	-0.9434
WDSUB1	-0.4074	-1.2277	-0.7108	-1.5564	-0.2793	-1.6439	-1.0923	-1.0291	-1.0862	-0.8211	-0.7202	-1.5437	-0.897	-1.3004	-0.5437	-2.4501	-0.3548	-1.415	-1.0087	-0.9269	-0.9379	-1.9051	-0.8836	-0.1665	-1.2584	-0.5312	-0.2987	0.0468	-0.9714	-0.9828	-0.8546	-0.5628	-0.3094	-1.074	-0.8186	-0.7784	-1.0058	-0.6148	-0.7226	-1.4035	-0.9743	-1.1714	-0.2828	-0.9714	-0.1016	-0.9714	-0.0395	-0.9914	-0.7466
GCS1	0.0129	-0.1016	-0.1811	0.0412	-0.3273	-0.1844	0.099	-0.0847	-0.5166	-0.482	-0.1109	0.1124	-0.1156	0.0594	-0.1376	0.3022	-0.2584	-0.2379	-0.1078	-0.1361	0.1493	0.111	0.8156	-0.2828	-0.1681	-0.4921	-1.0923	-0.3364	0.0158	-0.4941	-0.5735	-0.0233	-0.2969	0.123	-0.2619	-0.274	0.2363	0.2654	-0.5125	-0.0014	-0.4461	-0.152	-0.2758	-0.1697	0.583	-0.1633	-0.6574	-0.0058	-0.662
FLJ13391	1.6848	1.3403	1.1603	-0.0908	1.7225	0.9949	1.9756	-0.9269	0.6933	1.5301	2.0201	1.03	1.9851	-0.1681	1.9873	-1.6082	1.6871	-1.5951	1.719	1.7137	2.4292	0.275	2.4712	2.2922	1.1434	2.5333	-0.152	2.9044	0.848	-0.0469	2.4125	2.2762	2.1319	1.2147	1.5089	1.5375	0.7364	0.9023	0.4552	-1.6943	0.547	2.0353	1.2023	0.4222	2.5806	0.4372	0.6041	1.518	2.0614
FSHR	0.0827	0.0963	NA	-0.7155	0.4447	-0.2379	0.8695	0.157	-0.5735	0.3057	0.5529	-0.3511	NA	0.3208	-0.0262	0.384	0.1609	-0.484	NA	NA	NA	NA	0.6116	NA	-0.1313	0.1865	NA	-1.038	NA	0.1801	0.4136	0.3161	0.0029	NA	0.4478	0.144	NA	NA	1.4082	0.4351	0.3254	NA	0.0963	-0.2481	NA	NA	NA	NA	-0.3921
TMEM15	-0.2092	-0.7084	-0.6082	-0.8443	-0.0939	-1.0087	-0.8211	-0.9743	-0.4521	-0.7539	-0.8546	-0.3165	-1.0559	-0.881	-0.9828	-0.7155	-0.2277	-0.8678	-1.3511	-1.114	-0.8237	-0.5458	-0.0695	-1.0801	-0.8288	-0.6506	-0.9743	-0.4422	-0.811	-0.7131	-0.6643	-0.9856	-0.6804	-1.191	-1.2413	-1.3959	-0.5043	-0.4481	-0.9914	-0.8211	-1.3846	-0.3346	-1.2969	-0.8443	-0.5735	-0.3865	-0.8836	-1.152	-0.9159
LOC51255	0.7373	0.3962	0.7519	0.8922	0.585	0.3138	0.5811	0.3573	0.6781	0.6173	0.6369	0.7689	0.7242	0.5666	0.7172	-0.2863	1.2437	0.7949	0.4947	0.2582	0.2004	1.0279	1.3584	0.512	0.9283	1.1434	0.2203	0.5792	0.3516	0.6003	0.5782	0.7974	0.6871	0.2821	0.2054	0.6599	0.4038	0.6378	0.8734	0.6378	0.7866	0.4049	0.373	0.4552	1.0909	0.3242	1.5524	0.8262	0.8383
TLR1	2.9275	1.7088	1.7044	2.5415	1.2425	0.8416	2.2327	1.9415	1.7579	2.7095	1.6498	2.2345	2.4011	2.106	3.2135	-0.0574	1.3545	3.3477	1.9501	2.3813	1.515	2.3561	-0.3129	2.3962	1.584	1.9497	3.2932	1.9279	2.7828	2.099	3.4568	0.3334	1.4478	1.3028	2.9195	1.8532	2.3649	1.7978	2.2308	3.0545	2.7562	2.5536	3.1595	2.0969	1.4206	2.0391	0.1827	3.7225	3.5898
ALLC	NA	NA	NA	NA	NA	NA	NA	NA	NA	NA	NA	NA	NA	NA	NA	NA	-0.1617	NA	NA	NA	NA	NA	NA	NA	NA	NA	NA	NA	NA	NA	NA	-0.0145	-0.0321	NA	-0.0218	NA	NA	NA	NA	1.3488	NA	NA	NA	NA	NA	NA	NA	NA	NA
CMYA3	-1.8625	-1.6439	NA	NA	0.0524	-1.6943	-1.8783	-1.7909	-1.6712	-1.2076	-1.5312	-2.1329	NA	-1.4501	-2.7274	-2.2653	NA	NA	-2.4501	-1.2176	-0.7563	NA	-1.889	-0.9462	-1.041	-1.0559	NA	-0.7515	-1.6038	-3.4548	-1.415	-0.811	-0.3902	NA	NA	-2.3884	-0.4074	-1.8678	-0.417	-2.0649	-2.5064	-1.737	-1.4074	-1.811	-0.7084	NA	NA	-0.8059	2.1862
FHL2	0.984	0.8065	0.9351	0.1941	-1.8211	0.0243	-0.9971	2.0566	0.7774	1.6658	-1.1746	0.605	1.9226	0.5568	-0.0604	1.3494	1.5185	-1.1811	-0.5886	-0.1714	0.9993	1.7974	-4.1456	-1.0862	0.8024	1.9302	-2.4035	0.1557	0.5888	1.7437	1.5787	3.6724	-1.1488	-3.2793	-0.5064	-0.1187	0.7866	-1.6215	-0.9686	0.7031	-0.9078	1.1538	0.184	0.2253	0.2869	1.742	3.0832	0.9184	1.6332
ACTR3	0.3674	-0.1828	-0.071	0.2904	-0.035	-0.2042	-0.458	-0.0923	0.0538	0.051	-0.3846	0.037	-0.0604	-0.1456	0.0356	-0.1203	0.5221	0.2129	-0.2515	-0.2142	-0.3715	-0.0072	-0.5821	-0.2881	0.6257	0.4027	0.6107	0.1427	0.3663	0.2327	0.6617	0.4222	-0.5973	-0.8237	-0.1779	-0.2396	-0.013	-0.2898	-0.1649	0.1725	0.3741	0.2998	0.1738	-0.6552	-0.125	0.257	0.419	0.4478	0.5801
SFXN5	-0.5778	-0.2951	NA	0.0841	0.9501	0.251	-0.8757	-0.5002	0.0072	-0.8135	0.7732	0.3785	-0.2898	-0.0831	0.648	-0.4131	-0.5416	-0.5973	0.2642	-1.2311	-0.6712	-1.0029	-0.3529	0.7398	-1.0893	-0.2951	NA	-0.2584	NA	0.5685	-0.1345	0.0384	0.5955	NA	-1.3328	-0.9885	-1.0529	-0.2009	0.3561	-0.7179	0.7866	0.0895	0.4751	-0.5842	-0.0499	0.4584	-0.1763	0.2054	1.101
OSBPL6	-2.2723	-1.5437	-1.4035	-0.8339	2.0129	-2.5479	-2.3585	-1.889	-0.889	-1.0954	-0.7108	-3.4328	-2.3219	-2.1649	-2.3292	-1.9546	-2.4982	-2.3884	-0.725	-0.6689	-2.3004	-2.5312	-3.1584	0.189	-1.3921	-1.9051	-2.482	1.1117	-0.0816	-1.3659	-2.3808	-1.1779	-0.3566	-1.5023	-0.0816	0.4351	-1.2653	0.0786	-0.304	-1.9714	-1.8783	-0.5543	-1.4901	-1.5995	-2.1078	-2.035	-3.035	-0.5332	-0.2226
YPEL5	1.4431	1.4657	0.9833	0.8319	1.4694	0.044	1.2253	1.1583	0.9396	1.659	1.4787	0.2546	0.9993	1.441	1.3074	0.5685	1.308	1.3561	1.4563	0.7757	1.1157	1.8663	0.069	1.7824	0.9848	1.2792	1.6599	1.9042	1.7689	1.03	1.0335	1.9756	1.704	1.0683	1.8307	1.2827	0.5782	0.8172	1.8233	1.117	1.5641	0.8821	1.3431	0.9804	1.6915	-0.1552	1.9096	0.7941	1.4834
DUSP2	0.5714	0.3539	-0.2243	0.4782	-0.3978	-0.9351	0.2522	0.9928	-0.1125	0.9657	1.1137	-0.7131	0.0426	1.4849	0.1814	-0.5416	0.0963	0.6763	-0.3884	0.8106	-0.3827	0.364	0.1454	0.2129	0.7329	-0.46	1.1355	-0.963	1.2881	0.4844	-0.041	-0.3733	-0.5821	-0.1746	1.9237	0.2425	0.4594	0.2666	1.3386	0.8568	0.669	-0.4941	0.1583	0.451	-0.2311	0.5241	-0.6016	-0.685	-0.0058
ZC3H8	-1.2009	-1.3004	-1.1617	-0.963	-0.8494	-0.662	-1.3884	-1.5146	-2.0291	-1.5105	-1.462	-1.7612	-0.8186	-0.9105	-1.221	-1.7084	-1.7037	-1.3622	-0.662	-1.0029	-1.5146	-1.3076	0.1928	-1.3659	-1.1649	0.0909	-0.3865	-1.7084	-0.5395	-1.6215	-0.7884	-0.8573	-1.3328	-0.8034	-0.8943	-1.0116	-0.9462	-0.255	-1.2413	-1.4901	-0.8034	-0.5585	-1.077	-1.527	-0.8836	-0.4016	-0.5995	-0.4481	-0.6282
KCNK12	2.7086	-1.4228	0.6116	1.1124	-1.6712	-0.6529	0	-0.2362	-0.7442	-0.771	-1.0439	0.4136	0.7476	0.3516	-0.3733	0.1375	2.5948	-0.5002	-1.5778	-1.5606	-1.0954	0.4457	0.9268	-1.9105	-0.1584	-1.8573	-1.9828	-0.6484	0.3763	-1.0801	-0.5166	-2.3959	-1.816	-2.2653	-2.3004	-0.9132	0.514	-0.0679	-0.5564	0.7874	0.1814	-1.5564	-0.8678	-1.4982	-0.7179	0.543	0.1609	-1.041	-0.7226
TRIM54	NA	NA	NA	NA	NA	NA	NA	NA	NA	NA	NA	NA	NA	NA	0.0594	-1.2619	NA	NA	1.6586	NA	NA	NA	NA	NA	NA	NA	NA	NA	NA	NA	NA	NA	-0.0101	NA	NA	NA	NA	NA	NA	NA	0.3696	NA	NA	NA	0.1467	NA	NA	NA	NA
MOBK1B	1.2443	0.538	0.6781	1.1349	0.8024	1.0243	1.3161	0.9826	-0.4189	0.4425	1.5008	0.5578	0.9493	0.9553	1.8016	1.433	0.127	1.9389	1.0022	1.129	0.1827	0.8639	0.9305	-0.2026	-0.3255	1.1217	2.0465	1.5226	1.1629	0.0649	1.3978	0.5341	0.8416	0.4222	1.3618	-0.1219	0.2265	1.3852	1.0827	0.7442	1.3595	1.3414	1.1538	0.4782	1.1084	0.6462	1.779	1.3763	1.5578
RPL23AP13	1.1801	2.0793	0.3185	2.0065	2.1303	1.5627	3.0599	3.3334	1.1686	2.5765	1.8065	0.8914	3.9146	3.1674	2.8018	4.1946	2.0514	0.2642	2.4351	3.3196	2.5477	2.7592	2.7772	2.8655	2.5828	-0.5522	1.5898	2.4273	2.9407	2.99	1.4468	3.706	2.6832	3.5423	3.3306	2.954	2.5241	4.916	2.7662	2.4044	0.8592	1.3115	0.8655	1.5874	3.5509	1.1947	-0.1877	2.9264	2.7723
DSU	1.4694	1.0122	1.3271	1.1648	2.0225	2.145	1.6681	1.0538	0.3573	1.696	1.4885	1.3663	0.9942	1.5474	2.5998	0.4103	1.1434	0.9949	1.2467	0.7163	1.6677	1.1124	0.3334	2.0475	0.3185	3.3277	1.9019	2.4003	0.5489	1.0676	1.0122	0.1124	2.3089	2.067	1.1922	1.6243	1.0405	1.4515	2.4947	1.4276	1.7786	0.913	2.025	1.7974	1.9336	2.0193	1.6848	0.8687	1.7128
NPHP1	0.0868	0.0058	-0.0939	-0.3364	1.1795	-0.0174	1.2135	-0.4739	0.1097	2.2744	1.3173	0.3231	-0.0514	0.1738	0.0922	-0.1844	0.3426	0.1827	1.9727	0.5039	-1.074	-0.417	0.8805	1.9222	1.3989	-0.1488	0.103	1.0307	0.8367	0.8213	0.0144	0.636	1.2821	0.4071	0.4605	1.0158	-1.1392	1.107	0.8616	-0.1031	-0.3219	1.3254	0.069	1.0888	0.6799	2.1355	0.175	0.4916	-0.1488
RPN2	-0.6735	-0.7859	-0.4639	-1.0649	-1.5864	-1.7612	-1.8365	-1.3696	-0.6082	-1.3808	-1.4901	-1.1584	-1.9051	-1.458	-1.9546	-1.9214	-1.2413	-1.1617	-2.4501	-2.4901	-1.1109	-0.7809	-0.8997	-1.2688	-1.114	-2.3959	-2.0233	-1.7859	-1.3659	-1.1266	-1.4035	-1.6304	-0.8237	-1.6484	-2.152	-1.2723	-1.0589	-2.482	-1.7959	-1.5778	-2.2653	-1.7466	-2.0831	-0.9771	-1.462	-0.482	-2.5312	-2.1266	-2.1976
KIAA0406	-1.9942	-1.7322	-1.4501	-1.873	-2.5735	-1.6758	-2.8997	-2.8997	-1.415	-2.816	-2.4739	-2.0058	-2.5146	-2.4659	-3.589	-2.4739	-2.5064	-1.9942	-2.6712	-3.0831	-1.9105	-2.1392	-2.3076	-2.5312	-2.2379	-2.9546	-2.8678	-2.9434	-2.482	-2	-2.3292	-2.5995	-1.4941	-2.9434	-2.889	-2.3959	-1.9379	-2.2934	-2.4739	-1.9051	-2.9546	-2.4112	-3.4998	-1.8417	-2.4422	-0.9105	-2.8468	-2.4501	-3.1584
SFRS6	-1.0529	-0.5951	-0.5187	-0.1203	-0.4344	-0.9885	-0.9462	-0.5166	-0.6371	-1.5064	-0.5756	0.7093	-1.1779	-0.5208	-0.454	-1.1203	-0.692	-0.9406	-0.725	-0.7418	-0.8314	-0.3529	-0.8135	-1.1361	-0.6574	-0.6897	-1.5395	-0.3511	-1.662	-0.0985	-1.9885	-2.071	-1.4112	0.275	-0.152	-0.7784	-0.0985	0.5993	-0.4305	-1.1811	0.4287	-0.486	-0.3255	0.2029	-1.3111	-1.1844	-0.144	-0.1282	-0.5543
FRZB	1.6262	2.2354	1.7035	1.7929	0.9993	1.7321	2.4947	1.7381	2.6124	3.0211	2.9607	1.3718	0.5211	2.4131	2.1207	0.6951	1.9233	1.7698	1.6549	2.5415	0.5743	3.6358	-0.364	2.6494	2.0186	1.2023	2.2308	2.4821	3.4276	1.9913	0.2425	-0.3548	2.9079	0.7715	3.6938	2.8349	2.496	1.2702	2.4212	-0.2775	2.1365	2.1683	2.918	3.4249	2.2054	1.2588	2.6313	1.2606	1.4901
KCNK15	0.0215	-0.0321	-0.2671	0.1043	-0.1617	-0.0247	0.3448	0.3231	-0.55	-0.417	0.1097	-0.1361	0.2054	0.542	0.472	1.0086	-0.3808	-0.4739	0.1966	0.3448	0.2004	0.1763	0.539	-0.0174	-0.5437	0.044	-0.48	-0.1297	-0.2515	-0.2688	-0.125	-0.4901	-0.2828	-0.0454	0.2116	-0.114	0.2904	0.5221	0.0356	0.144	-0.1408	-0.074	-0.035	0.0976	0.6211	-0.1424	-0.2481	0.3057	-0.152
SDC4	1.0963	1.8556	0.547	0.5351	1.9913	0.0976	0.9935	0.9123	1.7247	1.4688	1.5998	-0.5995	-0.0365	0.5361	0.6154	-0.2584	1.0766	0.1137	1.0861	0.9613	1.5054	0.5479	0.688	1.6951	1.4125	-0.5756	0.2425	1.9287	0.1712	2.0535	0.1916	1.7075	2.1632	0.4287	0.9523	0.8106	0.7004	2.229	1.5326	0.5281	0.7013	1.0461	1.1117	1.4573	0.5568	2.6076	-0.1313	-0.0574	0.2522
TP53RK	-0.3715	-0.486	0.2253	-0.3183	0.2166	-0.8468	-1.482	-0.5713	-0.1795	-0.1976	-1.5395	-1.0529	-1.6943	-1.3328	-1	-1.8783	0.0607	-0.5353	-0.5564	-1.5228	-0.5353	-0.1568	-1.3004	-0.9324	-0.0203	-0.6439	-0.4699	-0.364	-1.221	-0.6416	0.1878	1.4005	-0.0454	-1.9714	-0.4093	-0.221	-1.3511	-1.2688	0.0426	-1.8314	-0.7984	-0.7539	-0.9187	-1.0923	-0.7735	-0.2447	0.5271	-1.1584	-0.1665
SALL4	-0.3959	-2.6439	0.0621	-1.8573	-1.5821	-1.071	-0.6689	-3.0469	-1.454	-2.3659	-2.482	1.8007	0.622	-0.1584	-1.1488	0.8164	-1.0619	-1.4344	0.2892	0.107	-2.1392	-0.9602	1.0101	-0.889	-1.2619	0.696	-2.2723	-0.8186	-0.4759	-2.6439	-1.0985	-0.0395	0.8789	-0.8237	0.3707	-1.221	0.7416	0.1467	-2.3364	-2.1266	-1.7959	-1.6529	-1.5692	-0.5187	-1.1681	-2.4112	-1.2042	-2.152	-0.46
LOC196463	0.7807	0.3829	0.4404	0.2702	-0.1943	0.2116	0.2425	0.0144	-0.2193	0.037	0.4404	0.2041	-0.2311	0.1362	1.1375	-0.0634	-0.0679	0.5888	-0.0695	0.545	-0.1109	-0.4461	0.08	-0.2009	0.0186	0.2928	0.7355	-0.016	-0.013	0.1336	0.1725	-0.5146	0.3254	-0.281	-0.3383	-0.2413	0.6462	-0.1584	0.1674	0.1738	0.0342	0.0058	0.5028	0.1322	-0.038	0.2485	0.3852	0.3254	0.1827
RP5-860F19.3	0.0029	0.3448	0.0229	-0.013	0.4573	0.1622	0.7774	0.7655	-0.7108	0.0243	0.1878	0.4233	0.5089	0.636	0.606	1.1538	-0.417	-0.881	0.2963	0.8311	0.6154	0.2339	0.3918	0.2618	-0.6282	0.24	-1.1779	0.3774	-0.3585	-0.2311	-0.3401	-0.4131	0.148	0.0676	0.6425	0.0186	0.8592	0.8049	0.0718	0.2461	0.0772	0.0621	0.2594	0.3288	0.6889	-0.0218	-0.6237	0.5636	-0.0365
AVP	0.269	-0.0544	-0.3733	0.0043	0.2265	0.148	0.6285	0.7698	-1.2345	-0.5585	0.1852	-0.097	-0.3058	0.7128	0.8343	1.7163	-1.255	-1.0087	0.2928	0.4977	0.542	0.2302	0.8351	-0.5332	-1.5228	0.4605	-0.7934	0.03	-0.2159	-0.7686	-0.2584	-0.2636	-0.4189	0.0468	0.2821	-0.2723	-0.1617	-0.0014	-0.2533	-0.2159	-0.191	-0.5291	-0.3585	-0.0954	-0.4383	-0.7515	-0.1584	0.9313	-0.488
PRNP	-0.1665	-0.3419	-0.7108	-0.9269	-0.5929	-1.0439	-0.8314	-1.2109	-1.6259	0.0786	-0.6506	-0.9885	-0.6259	-0.9828	0.338	-1.6484	-0.5585	-0.3111	-0.3677	-0.1219	-1.0262	-0.749	-5.1688	-0.4112	-0.3696	-0.0395	-0.3364	-0.0634	-0.1861	-1.0233	0.4447	-0.1031	-0.4247	-1.5778	0.0356	-0.255	-1.1047	-0.9546	-0.2379	-1.152	-0.9743	-0.144	0.3334	-0.8599	-0.5458	-1.2898	0.2388	-0.2671	0.8805
BFSP1	-1.6897	-0.776	-1.462	-0.1329	1.2642	-0.7735	-1.1203	-1.3076	-1.2413	-1.0862	0.0328	0.7251	-0.2793	-1.3364	-1.3328	-1.1779	-0.7784	-1.2584	-0.873	-0.4739	-1.5437	-0.8599	-2.114	-1.2447	-1.7959	-1.5146	-1.7037	-0.606	-0.6349	-1.9434	-1.5479	-1.1329	-2.0058	-1.458	-1.5437	-1.5821	-0.5166	-0.1031	-0.9799	-0.3733	-2.2447	0.542	-1.1109	-1.1943	-1.255	-2.0529	-0.5585	0.2203	-0.1219
INSM1	-5.3277	-5.7331	-6.299	-5.7179	-5.673	-5.6367	-5.5598	-5.3219	-6.2543	-5.7642	-5.4548	-5.9658	-5.5598	-4.9977	-5.3511	-5.035	-5.6012	-6.0303	-5.5735	-5.7255	-5.357	-5.939	-4.9346	-5.6082	-5.673	-5.5129	-5.9568	-5.7027	-5.7331	-5.5666	-5.772	-5.8365	-6.3808	-6.0209	-5.399	-5.4675	-5.1792	-5.5395	-5.5804	-5.138	-5.3047	-5.0398	-5.2056	-5.6367	-5.6878	-5.7642	-6.3688	-5.3629	-5.1584
NAPB	-2.816	-2.071	-2.2447	-1.7084	-2.2311	-3.0831	-3.8283	-1.9942	-2.3004	-3.2793	-3.3219	-2.4035	-3.2243	-2.0529	-3.1078	-2.9105	-2.5995	-2.3076	-2.2243	-3.035	-2.1016	-1.4901	-3.0589	-1.9658	-2.5228	-1.9714	-1.6038	-2.5821	-2.0589	-1.3511	-1.3696	-1.6529	-1.4422	-1.7515	-1.8836	-2.0954	-2.6349	-1.7959	-1.949	-1.9885	-2.1266	-3.1456	-1.462	-2.9658	-2.2243	-2.6171	-2.3959	-2.0831	-2.2584
C20orf3	0.1763	0.0963	-0.0939	-0.1001	0.1903	-1.4739	0.0043	-0.6237	-0.484	-0.114	-0.2464	0.9146	-0.4461	-0.1456	0.2091	-0.7984	-0.7612	-0.1203	-0.3884	0.0496	-0.6349	-0.3076	-0.1536	0.1953	-0.3771	-0.2176	-0.3733	-0.2396	0.5489	-0.6016	0.2762	0.3539	0.1043	-1.3111	-0.6215	-0.125	-0.0247	-0.3147	-0.6758	-0.8546	-1.3622	-0.331	1.0229	0.0922	0.4038	-0.8034	-0.8262	-0.1424	0.1124
SPAG4L	-0.3292	-0.5543	NA	-0.567	0.3606	0.2066	-0.0306	-0.5187	-0.9518	NA	-0.0664	-0.1504	-0.6326	0.1596	-0.0233	-0.3401	0.0086	-0.2969	NA	NA	-0.9078	-0.7686	-0.9658	-1.458	NA	0.0426	-0.1062	0.3185	NA	0.2437	-0.2126	0.24	NA	NA	-0.6781	-0.7226	0.0676	-0.6416	NA	NA	0.5936	-0.6038	-0.1779	NA	-0.7155	NA	NA	NA	-0.364
RALY	-0.7037	-0.897	-0.5166	-1.1456	-1.0469	-1.0529	-1.1456	-1.2176	-0.5692	-0.7784	-1.2109	-1.0954	-0.5886	-1.1617	-1.3808	-1.077	-0.4982	-0.5842	-1.6126	-1.771	-0.6038	-0.8059	-1.462	-0.8863	-0.9269	-1.6804	-1.3622	-1.114	-0.9296	-0.6689	-1.8836	-1.2863	-0.5332	-1.5395	-1.1877	-1.1779	-0.488	-1.482	-0.9686	-1.2688	-1.6897	-1.4266	-1.7084	-0.5929	-0.6349	-0.3094	-1.7418	-1.6439	-1.737
RBM39	0.394	0.3092	0.3973	0.6471	0.1296	0.0058	0.1661	0.6022	0.6135	0.2116	0.1852	0.2951	-0.3094	0.8139	0.2339	-0.1031	0.0328	-0.016	0.2485	0.5917	0.263	0.2066	0.184	-0.0291	0.4751	-0.3492	-0.0816	-0.3846	0.9672	0.1336	-0.3789	0.1401	0.6663	-0.1392	0.2129	0.3482	-0.0233	-0.0365	-0.2379	-0.3733	-0.3511	-0.0218	-0.5353	0.1852	-0.3978	0.0144	0.0676	-0.0087	-0.2447
LAMA5	-0.0174	-0.6529	0.3674	0.9935	-0.1584	0.5099	0.5588	0.2314	0.127	-0.3677	-0.2951	1.7583	-0.0816	0.6663	-0.3771	0.9978	0.8246	-0.5043	-0.2026	-0.1456	0.2066	0.1362	2.1843	0.5568	-0.221	-1.2311	-0.737	-0.8262	-0.1926	0.1017	-0.5374	0.2116	0.2951	2.2597	0.0086	-0.0877	0.6126	-0.0604	0.3618	0.7874	0.0745	0.6781	-0.4719	0.175	0.1283	1.3746	-0.6689	0.3288	-0.2109
TM2D2	-0.1456	-1.7037	-0.0725	-1.9159	-0.6597	-1.486	-2.5395	-1.4501	-0.0544	-0.2775	-2.3808	-1.4112	-1.3474	-2.7274	-2.5649	-3.5328	-0.0439	-0.7884	-3.8365	-2.8783	-0.897	-0.7934	-3.8468	-0.8651	0.1966	-0.2828	-0.9971	-1.9214	-0.2498	0.355	-0.9024	-0.454	-1.7859	-2.0893	-2.0529	-1.3884	-2.3219	-2.8059	-1.7037	-1.221	-0.881	-0.9078	-2.0233	-0.7108	-1.8836	-1.0649	-0.706	-2.1779	-0.5929
GRIK1	-0.9658	-2.5735	-1.873	-1.7563	-1.9546	-2.8997	-3.4532	-2.5312	-3.4787	-3.0954	-2.8262	-1.9159	-3.0233	-3.2515	-3.4548	-3.1584	-2.1016	-2.1714	-3.4173	-1.9771	-1.1078	-1.4941	-1.1649	-1.077	-3.8201	-2.2042	-2.4659	-2.7274	-2.0649	-0.9942	-2.5649	-2.0529	-1.0529	NA	-1.3733	-3.7681	-3.0469	-2.3511	-2.1266	-2.5146	-3.3748	-1.4074	-2.2379	-2.5479	-2.662	-2.6897	-2.3808	-1.6394	-1.9105
SLC5A3	0.6295	1.7545	2.0076	1.5311	1.1871	1.4746	3.2575	0.9268	1.0208	-0.3273	1.2491	0.5926	1.7643	1.4152	0.8024	2.1935	1.1991	1.4356	1.3989	3.1806	1.7207	0.6069	3.4594	-0.9324	1.848	0.739	1.175	0.1852	1.5059	0.9268	2.3063	1.722	1.2624	3.0433	2.1003	0.4647	0.9731	0.5607	1.3115	0.4103	0.757	1.3556	0.6517	0.2762	0.6654	0.6107	3.0088	2.1355	0.9222
DSCR6	-1.4228	-3.8847	-4.5907	-1.2009	1.4378	1.8667	-4.0783	-4.3219	0.3057	-3.3823	-4.3929	-0.7959	0.9731	-2.5821	-3.5925	-2.1779	-0.9132	-1.1681	-3.4438	-2.2379	-2.8573	-3.6295	1.5724	-3.8262	-4.0233	-5.0445	0.6844	-1.2076	-1.3733	-4.4297	-2.035	-2.071	-1.3147	-2.7274	-2.889	-2.6897	-3.5462	-2.4266	-4.6584	0.433	-3.5683	-0.4941	-4.319	-3.8079	-1.1016	-0.5187	-2.0589	-2.071	-1.9105
PCP4	-0.0262	1.825	1.2172	2.147	0.0827	-0.3585	2.4074	0.7958	2.8504	1.6267	-0.9269	-0.4016	1.5597	0.4998	2.519	-0.0877	2.5731	3.1473	-0.9241	0.8016	-0.144	3.8972	-1.5649	2.9294	2.0503	-1.152	0.1427	1.1998	3.3146	1.0222	2.0861	1.0433	-1.2934	3.5435	-0.4325	-1.1584	-0.6282	-0.8651	2.019	0.9986	3.1683	-0.2863	-1.2379	2.5914	1.474	-0.5735	2.5673	0.5984	3.9439
C21orf33	-0.0725	0.0772	-0.2294	-0.0336	1.0607	0.2154	0.2203	-0.1488	0.111	0.037	0.2654	0.0101	0.0895	-0.3346	0.229	-1.3255	0.7841	0.2363	0.6126	1.0129	-0.1926	-0.2619	0.0201	0.0426	0.7748	-0.3529	-0.737	0.2892	-0.3548	0.3741	0.4947	-0.4074	0.4297	0.5627	0.1991	0.3403	-0.1313	0.115	-0.1078	0.406	0.3277	0.2845	0.6041	0.4114	0.2437	0.2066	0.275	0.5331	0.2774
PTTG1IP	0.518	0.4626	0.965	0.1852	0.8327	0.52	0.5801	0.9479	0.6951	-0.0043	-0.125	0.3796	-0.0014	0.0229	0.4125	-0.2636	1.6576	0.1738	-0.0101	1.5758	0.3219	0.2166	-0.3548	-0.3255	0.6554	0.8205	-0.6171	0.0129	-0.2898	0.8899	1.3785	-0.0425	0.0426	-0.4422	0.0524	0.2821	0.7841	0.5588	-0.0604	0.7774	-0.038	0.6745	0.4834	0.4394	0.5231	0.0745	0.739	1.4854	0.394
KRTAP4-10	-2.5821	-2.2723	0.4573	-0.152	2.8972	-2.8468	-3.1329	-2.7563	-1.9434	-2.8678	-2.7859	-2.889	-3.4282	-2.5821	-2.662	-2.3659	-0.6171	1.3334	-3.1203	1.24	-1.3474	-1.7179	3.0604	-2.041	3.4764	-2.3219	3.4699	-1.4074	-2.2042	-2.5821	0.1414	-1.7131	0	-0.7637	NA	1.8209	-2.4112	2.1197	-1.4112	2.0111	-2.3659	-2.3076	-1.0469	4.1882	-0.8262	-2.4901	4.6582	-1.7515	-1.5821
GSCL	NA	NA	NA	-0.3884	0.8408	1.0642	0.519	0.9731	-0.8836	NA	1.0079	0.451	0.7364	1.4168	1.0704	1.1699	-1.1779	0.0813	-1.2076	0.5221	NA	0.2004	0.0552	NA	NA	0.1427	-0.6461	0.9084	NA	NA	1.06	-0.4961	0.0895	NA	0.2029	-0.7735	0.54	0.6763	0.1243	0.3045	-0.191	NA	NA	0.1414	NA	0.4699	NA	0.8906	0.3196
ARVCF	-0.7274	0.3323	0.1204	0.0745	-0.889	1.1395	-0.0291	-0.6038	0.6681	-0.4442	-0.6781	0.6772	0.0936	-0.6597	-0.5353	-0.5842	0.263	-0.8573	-1.415	-0.304	0.8836	-0.0649	0.518	-0.0218	-0.5125	-1.8365	-2.1078	-1.0058	-0.5002	-0.3733	-1.454	-0.0145	-0.0499	0.0676	-0.0877	0.4584	0.4082	-0.9714	-1.0233	-1.5649	-1.486	-0.6349	-0.7661	0.3219	1.0093	0.4573	-1.7418	-1.4228	-1.2277
THAP7	-0.9658	-0.7013	-0.8365	-1.5735	-1.1649	-0.1472	-1.1746	-1.2311	0.0454	-1.2009	-0.8494	-0.8288	-1.2969	-0.8135	-1.1617	-1.1456	-0.771	-0.6873	-1.1172	-1.415	-0.255	-0.6804	-0.5353	-1.2345	-1.2515	-1.2515	-1.6038	-0.7834	-0.6282	-1.2619	-0.897	-1.2828	-0.364	-0.6712	-0.7515	-0.6943	-0.8573	-1.9885	-0.8916	-0.9024	-1.3921	-1.0058	-0.6597	-0.1109	-0.5951	0.1725	-1.7274	-1.3733	-1.415
LOC96610	-0.2688	-0.0291	-0.5208	-0.4982	-0.1424	-1.0116	-1.3959	-0.8757	0.1725	-1.0291	-0.4901	-1.0499	-0.9241	-1.3659	-1.1424	-1.462	-0.4521	-1.5864	-1.3219	-0.1361	0.2253	0.1789	-0.274	-1.1746	0.115	-0.7179	-0.5821	-1.0649	-0.5713	-0.46	1.125	-0.5353	-0.725	-1.2934	-1.1047	-0.3752	-0.771	-0.6666	-0.9602	-1.1329	-0.6529	-0.2793	-0.9799	0.0398	-0.3715	-0.3902	-0.8997	-0.394	-0.484
GSTT2	1.1408	1.4362	2.5826	0.406	0.2339	-1.0321	0.4636	0.5049	0.4478	-0.1763	-0.2636	-0.8599	0.8624	-0.1861	-0.2567	-0.2026	0.6323	-1.1392	2.1696	1.5743	0.8813	-0.071	2.5777	1.9535	0.4885	1.2228	0.157	1.5336	-0.2619	0.7664	-0.8009	-0.5291	1.1243	1.8856	1.5695	1.5524	1.7398	0.4372	0.8237	-1.3111	-0.5437	-1.2584	2.281	0.6022	1.3774	2.228	-0.5416	1.0538	2.1963
ADORA2A	0.2904	0.0963	-0.9574	0.0772	-0.7735	-0.3094	0.2951	-0.0014	-0.0604	0.257	-0.3165	0.6378	-0.2362	0.9826	-0.173	0.0101	-0.1266	0.704	-0.9546	-0.6394	-0.1763	0.923	0.3357	-0.1844	0.2522	-0.2159	-0.1408	-0.6552	0.542	0.6572	0.1738	-1.152	0.6736	0.1017	0.4212	1.0566	0.4447	-0.5735	0.1814	0.9775	-0.1001	-0.8034	-0.7108	0.1622	0.2425	0.779	-1.5105	-1.5951	-0.6259
HPS4	-0.9799	-0.6781	-1.0529	-0.811	0.1827	-0.737	-0.9574	-0.7784	-0.737	-0.125	-0.2653	-1.1392	-0.415	-0.6082	-0.3364	-0.1746	-0.9546	-0.567	-0.3789	-0.2294	-0.2109	-0.394	-0.331	0.0594	-0.7588	-0.5208	-0.2076	-0.3752	0.2473	-0.454	-0.5973	0.3057	-0.2109	0.3219	-0.2159	-0.1472	-0.7834	-1.6574	-0.4266	-0.3566	-1.6038	-0.7884	-0.9856	-0.5208	-0.394	-1.4344	-0.889	-0.8417	-0.6171
CHEK2	-1.3437	-2.2042	-1.038	-0.8573	-0.6597	1.044	-0.5395	-2.3292	-0.2533	-1.221	-1.7859	-1	0.2116	-0.8314	-1.1456	0.364	-1.486	-1.0233	-0.3129	-0.5735	-0.749	-0.3771	0.3674	-1.8365	-1.1361	-0.0862	-0.097	-0.4208	-0.3715	-1.8365	1.005	-2.6082	-1.0203	-1.7809	-0.9214	-0.5756	-0.2706	-1.482	-1.1617	1.2191	-1.2653	-0.2671	-1.7563	-0.7202	-0.0695	-0.3201	-1.041	-0.5713	-0.5064
STAC3	0.9913	1.123	0.6517	0.7163	-0.038	-0.0306	0.2016	-0.191	0.8432	0.6145	0.5675	0.4158	0.4351	0.4678	1.7803	1.2209	0.7022	0.9964	1.473	0.2642	1.1263	0.1322	-0.2379	0.3741	0.2963	0.2179	1.3663	0.8294	0.5049	1.5489	0.1519	-0.2567	0.8797	0.294	0.7321	0.4668	0.8969	0.6295	0.518	-0.0619	0.8456	-0.3292	1.3601	1.1197	0.5926	0.5984	-0.949	0.8766	0.6388
THOC5	-1.9771	-2.2109	-1.9942	-2.699	-2.5312	-2.0116	-2.9885	-2.3292	-0.9885	-1.8211	-2.5907	-2.3076	-1.9324	-2.5995	-2.3292	-2.5995	-1.114	-2.4982	-2.6082	-2.3733	-1.1016	-1.816	-2.077	-2.0649	-1.873	-3.2515	-2.8262	-2.889	-2.1779	-1.7515	-2.6897	-2.1392	-1.5064	-1.6439	-2.4344	-1.9434	-1.7179	-3.1976	-2.1976	-2.3659	-2.5735	-2.9546	-2.9658	-1.7322	-1.3328	-1.8678	-3.1078	-3.2934	-2.8997
MGC17330	1.6677	1.6411	0.4372	0.538	0.9441	0.6581	1.3752	1.9497	2.0898	1.5607	2.2403	0.4372	1.6754	1.3539	2.5082	1.6875	2.2305	2.2612	1.965	2.5931	1.3984	0.7398	-0.737	1.7799	1.6041	0.0158	1.2594	1.4292	1.4292	2.873	0.9336	1.4255	2.5198	0.7049	2.2228	1.6102	1.542	1.2845	1.9211	0.7638	1.7	0.7765	2.0803	1.8164	2.3746	0.9782	0.6663	0.7338	1.294
NCF4	3.8379	4.3847	3.6427	2.2887	3.6485	2.559	4.2265	3.6993	3.3757	4.6565	4.0652	3.957	3.9011	4.327	4.3709	2.5709	3.3406	4.797	3.6848	3.8207	4.0875	4.2079	NA	4.4976	3.5741	2.2491	3.7918	3.9001	3.5211	3.4995	3.8359	3.4182	4.3716	4.2203	3.7793	4.991	4.5656	2.9939	3.706	4.849	4.3031	3.4489	4.0925	4.7431	4.3736	4.5122	1.3516	4.0295	2.951
PGM5	-0.3997	0.1375	-0.1633	-0.4247	2.6683	-1.6529	0.2618	0.4584	-0.3201	0.4906	-0.737	-1.852	-0.8757	-0.7155	-0.0365	-2.152	-0.274	-1.3255	-0.6016	-1.5522	-0.6171	-0.6259	-2.3733	-0.5291	0.2594	-1.2042	2.3141	-0.2142	0.9546	0.6915	-2.7179	-1.304	0.8938	1.8918	1.6902	1.364	-0.3147	-0.873	0.6041	-1.0439	-2.2379	-0.1313	0.6267	0.2302	0.3973	-1.1584	0.8671	0.1375	0.0635
TBC1D22A	0.4147	0.4362	-0.1078	-0.0203	-0.6193	0.0243	0.2116	0.959	0.364	-0.0101	0.5763	-0.4247	0.3265	0.6897	0.8544	1.0377	0.2821	0.0101	0.229	0.926	0.7562	0.1674	-0.3585	0.2228	0.1966	-1.077	-0.6171	0.0257	0.0186	0.9583	-0.3201	0.3618	0.5782	0.2558	0.0101	0.0144	0.547	-0.4266	0.2166	0.4772	-0.5187	-0.6643	0.1217	0.2461	0.0731	0.184	-0.9105	-0.364	-0.3622
SBF1	-0.2413	-0.9132	-1.152	-0.9771	-1.8211	-0.8916	-1.2447	-0.5799	-0.3677	-0.7959	-0.7515	-0.7637	-0.6827	-0.0847	-0.488	-0.1361	-0.0469	-1.1329	-1.1943	-0.8599	-0.5479	0.1916	-1.0649	-1.1392	-0.364	-1.6758	-1.5692	-1.4035	-0.816	-0.2294	-1.2176	-0.8417	-0.9942	0.5666	-0.5842	-0.5606	-0.304	-1.5312	-0.6666	-1.3437	-1.2009	-1.3076	-0.5606	-0.2092	-0.4779	-0.2193	-2.2109	-1.3255	-1.6215
MOBP	NA	NA	NA	NA	NA	NA	NA	NA	NA	NA	NA	NA	NA	NA	NA	NA	NA	NA	NA	NA	NA	NA	NA	NA	NA	NA	NA	-0.7394	NA	NA	NA	NA	-0.0029	NA	NA	NA	NA	NA	NA	NA	NA	NA	NA	NA	NA	NA	NA	NA	NA
LRIG1	0.7849	1.5336	0.9373	0.7664	-0.3622	1.595	1.6116	0.6717	1.9084	1.3173	1.3852	1.107	0.6388	0.4584	0.6069	-0.456	1.4065	1.4044	1.3482	0.2702	1.7329	1.342	0.659	1.6337	1.1648	0.7638	0.4906	1.8003	0.4709	0.6154	0.5361	1.4174	1.3663	2.1875	1.5079	2.0317	1.1329	1.473	1.8627	-0.4961	0.9441	0.7672	2.1332	0.9411	1.3277	0.1878	1.0482	0.688	1.0022
ABTB1	0.6164	0.0594	0.123	-0.0029	-0.2042	-0.191	0.7706	1.2425	-0.0439	0.6351	0.433	-0.0985	0.1852	0.3561	0.5898	1.2636	0.2714	0.3785	0.5548	0.1557	-0.038	0.7858	-0.2076	0.6672	0.0663	0.157	0.5656	0.2166	0.058	0.9775	-0.3884	0.2987	0.6173	0.294	0.8984	0.6526	0.33	0.7715	0.4233	0.3277	0.0745	-0.1714	0.3785	0.0663	0.6826	-0.1282	0.5607	0.7373	0.1388
TMEM22	0.3265	-2.7084	-3.1714	-3.3219	-3.9368	-2.5146	-2.152	-2.1078	-2.7661	-2.3659	-1.8468	-3.2515	-2.6259	-1.5228	-1.5353	-1.2009	-2.4739	-3.5513	-1.3959	-2.8365	-3.2653	-0.0604	-2.1649	-3.7486	-2.9771	-1.3997	-2.4982	-2.2379	-2.6349	-2.4901	-1.8009	-5.0541	-1.8314	-2.6712	-2.1203	-2.6171	-2.662	-2.7661	-3.0469	-1.9658	-1.1779	-2.1976	-2.2515	-2.9105	-3.2653	-1.2828	-1.776	-1.3076	-2.2379
GABRB3	-5.6878	-2.4501	-1.071	-3.2109	-4.673	-2.662	-4.9214	-2.3884	-2.4901	-3.3614	-1.1203	-1.454	-4.6439	-2.8783	-4.3838	-5.4675	-1.2653	-4.7642	-4.0856	-5.7255	-2.1584	-0.1424	-2.4266	-1.5064	-5.7879	-4.7255	-5.3511	-0.0043	-5.673	-3.4723	-2.9214	-1.9214	-4.3335	0.2702	-2.889	-0.8237	-0.458	-4.0661	-1.5606	1.2576	-0.6016	-5.6953	-3.5786	-1.8314	-2.458	-4.8826	-0.776	-0.7784	-3.9523
AZI2	0.7958	0.33	0.1427	0.3505	0.2916	1.0915	0.622	0.4457	-0.3383	0.9411	0.648	0.1814	0.338	0.704	1.2339	-0.816	0.2904	0.5993	0.8774	0.8969	0.3482	0.9434	0.6079	0.7207	0.3414	0.7732	1.7013	0.7587	0.9107	-0.2881	0.6636	1.157	0.4875	0.3718	0.8205	0.4255	0.123	0.3265	0.537	0.4265	0.976	0.0058	0.9456	0.2154	0.1243	-0.6104	0.9627	0.7715	1.1184
CCDC52	0.4688	0.0482	0.8984	0.1401	0.3311	0.0963	1.5945	0.281	-0.0101	0.1865	-0.6038	0.1137	0.4998	-0.0877	-0.1172	0.8254	-0.2969	1.3219	0.3426	-0.1376	0.5772	0.0594	0.4233	-0.3328	-0.3401	0.8278	0.7207	0.4287	-0.3094	-0.1926	0.1467	1.5236	0.8969	0.2265	0.0704	0.3173	-0.0544	0.2654	0.4626	0.08	0.2821	-0.6016	-0.7563	-0.488	-0.2845	-0.0816	1.3623	0.1852	0.263
RNF7	0.1776	-0.3548	0.1661	-0.3456	-0.4461	0.3311	-0.2481	-0.2059	-0.0218	-0.2176	-0.3219	-0.1844	-0.0725	-0.4344	0.0229	0.364	0.8375	0.5734	0.0201	-0.3696	-0.4364	0.2497	1.105	-0.5353	0.1322	0.3595	0.0356	0.1991	0.0129	0.0676	0.1903	0.0868	-0.2934	0.0058	-0.2934	-0.4286	-0.3237	-0.0203	0.051	0.3254	0.0704	0.6003	0.2654	-0.692	-0.2362	-0.5821	0.3391	0.0272	0.1928
ZBTB11	-0.484	-0.3696	-0.2969	-0.3346	-0.2706	-0.0425	0.3173	-0.3255	-0.3752	0	0.251	-0.6326	-0.2934	0.2473	0.3022	-0.191	-0.3401	0.1928	0.6041	0.03	0.0745	-0.3566	0.0014	-0.2277	-0.3237	0.044	1.2904	-0.243	-0.0755	-0.7686	-0.0072	0.2016	0.0115	-0.3346	0.189	-0.2706	-0.3566	0.281	0.119	-0.415	0.3774	-0.3437	0.0172	-0.5002	-0.4982	-0.1047	0.544	-0.1062	-0.013
NR1I2	0.5656	NA	NA	NA	NA	NA	NA	6.4474	NA	0.8496	NA	NA	4.2464	NA	0.099	6.4637	NA	NA	NA	NA	NA	NA	NA	NA	NA	NA	NA	0.9069	NA	4.3597	NA	NA	-0.0277	NA	-0.0101	0.7604	NA	0.0257	NA	NA	0.3561	NA	NA	NA	NA	NA	NA	NA	0.2892
ANKRD28	-0.2026	-0.5312	-0.7013	-1.2793	-1.2009	-0.8391	-0.8757	-0.9828	-0.5416	-0.7466	-1.2345	-0.8365	-0.5105	-1.4035	-0.482	-0.7084	0.2497	-1.1203	-0.7515	-1.3808	-0.1001	-0.1472	-0.1078	-1.5778	-0.5929	-1.2653	-0.4442	-0.8211	-1.4422	-1.1681	-0.6712	-0.2688	-1.041	-1.5479	-2.7859	-1.5692	-1.304	-0.6282	-1.0291	-1.5778	-0.9743	-1.0649	-0.8494	-1.6038	-1.5692	-1.2723	1.2839	-0.6237	-0.7394
LPHN3	-5.0398	-2.8678	-2.6082	-1.9714	-2.7084	-3.1584	-1.3474	-1.1779	-3.335	-0.6967	-1.8009	1.2857	-2.7859	-2.2109	-2.8678	-4.2821	-2.5821	-4.1028	-3.4612	1.0559	0.518	-2.889	-4.9885	-2.041	-2.0174	2.8683	-0.1828	-1.6574	-0.699	-1.0893	-4.9214	-2.5312	-2.0649	-4.8954	-0.3111	-2.1203	-0.071	-1.4305	-3.0469	-5.6657	-3.5925	-1.2828	-1.4901	-2.7466	-1.5951	-2.8573	-0.8573	-1.5105	-1.1844
SYN2	-3.7879	-4.5328	-4.2849	-4.5942	-4.5295	-3.939	-4.816	-3.1329	-4.4485	-5.0783	-4.939	-4.4612	-5.1584	-4.1636	-3.5838	-4.3019	-3.917	-3.7046	-4.8365	-4.3481	-2.9324	-4.0807	-4.1178	-3.6529	-5.3452	-3.917	-3.9613	-4.1329	-3.1714	-3.6584	-2.662	-3.7236	-2.9885	-4.0374	-3.6403	-5.4612	-4.2934	-4.3306	-3.3748	-3.5228	-4.319	-4.4998	-3.9148	-4.3306	-4.6511	-4.6547	-3.6785	-3.1714	-4.2709
TADA3L	0.472	0.1725	-0.0321	0.1322	0.0524	0.1903	0.4678	0.2473	0.1283	0.4457	0.6154	0.0922	0.926	0.3448	0.4147	0.6627	0.3539	-0.0321	0.1699	0.4552	0.3219	0.2654	0.0058	0.4114	0.3127	0.224	0.148	0.7757	0.0215	0.2179	-0.3997	0.7638	0.4244	0.1916	0.189	0.0841	0.224	0.3907	-0.1047	0.3254	0.1309	0.1596	0.4394	0.224	0.2079	0.0745	0	0.4093	0.3539
IL5RA	NA	NA	NA	NA	NA	NA	NA	NA	NA	NA	NA	NA	NA	NA	NA	NA	NA	NA	0.7433	NA	NA	NA	NA	NA	-0.394	NA	NA	NA	NA	NA	NA	NA	-0.0014	NA	NA	NA	NA	NA	NA	NA	NA	0.0086	0.7706	NA	NA	NA	NA	NA	NA
GHSR	0.3115	0.4404	0.0538	0.4082	0.5241	0.5878	0.5917	1.0496	0.0594	0.263	0.6897	0.5311	0.4308	0.5568	0.719	1.0482	-0.0634	0.4647	0.7111	0.5888	0.5099	0.257	1.2845	0.7155	-0.0847	0.3863	0.6229	0.5008	0.1827	0.1493	0.24	0.3103	0.547	0.8106	0.6572	0.4751	0.4447	1.2756	0.659	1.0335	0.5695	0.4573	0.4308	0.5079	0.3685	0.8057	0.1953	0.7476	0.4255
TMEM113	0.541	0.2104	0.2041	0.1204	-0.2793	0.5869	0.1789	0.1322	0.7476	0.4244	0.394	0.301	-0.2294	0.2104	-0.0574	-0.5929	0.9723	-0.2294	-0.1297	0.0759	0.3231	0.6745	0.4016	-0.3237	0.1506	-0.4719	-0.2567	-0.255	0.2998	1.0029	-0.2987	-0.0203	0.45	0.514	-0.5187	-0.4286	0.2726	-0.4131	-0.1047	0.2916	-0.0425	-0.55	-0.2109	-0.2294	-0.3165	-0.6259	-0.486	-0.5522	-0.035
ITIH4	2.4639	3.0654	1.9107	2.9336	2.3677	2.4452	3.6871	2.7801	1.6131	3.2279	3.2449	2.8424	4.5625	2.9462	3.7845	2.9111	3.0029	3.0678	4.1914	3.5934	3.0902	4.3045	2.8373	3.7431	3.1616	2.1985	2.7051	2.8406	3.3533	3.3128	2.7216	2.3838	3.2633	4.1938	4.7366	3.7908	3.7257	3.4222	3.2953	3.6229	2.8817	2.6381	3.2504	2.7933	4.3205	2.4367	2.1502	3.9021	2.5573
SLC26A6	0.1674	-0.4719	-0.2396	0.6717	-0.897	0.3674	-0.606	-0.1697	0.0186	-0.4403	-0.4383	0.5646	0.5705	0.301	-0.2881	1.1519	0.4103	-0.2498	-0.2396	-0.6827	0.2091	0.229	0.45	-0.5166	-1.0831	-1.2723	-1.5187	-0.9714	-0.3771	0.0772	-1.1746	0.545	-0.5374	0.4865	-0.4035	-0.5249	-0.0365	-0.46	0.1674	1.4901	-0.949	-0.7013	-1.0559	-0.6689	0.4647	-0.2026	-1.1584	-0.0174	-0.5929
ILDR1	0.7198	1.4292	0.8976	1.9859	0.384	0.2998	0.8311	1.2449	0.7119	0.5281	0.7757	1.1499	1.342	1.269	0.5898	1.3857	0.5907	0.4383	0.6581	1.0328	0.7807	0.6772	1.8286	1.3539	0.5859	-0.2688	0.1427	0.4468	0.8631	0.9738	0.2004	0.9343	0.6978	1.6196	0.9767	0.9899	1.0793	1.2376	0.3663	0.688	0.1674	0.541	0.3414	1.0915	1.3561	0.4936	-0.2042	0.4957	0.8781
CXCR6	6.6254	5.8738	3.8992	5.4938	4.9905	5.5304	6.1461	6.6112	5.0339	6.1194	5.1977	5.3302	5.5792	6.5089	6.2342	5.4861	4.7861	5.4835	3.7159	5.3027	4.5141	6.0697	3.3771	5.2776	5.0272	5.9453	5.434	3.957	5.1542	5.643	5.3709	3.4114	4.8258	3.6803	5.4607	5.7388	5.1363	5.9196	4.784	6.5896	5.6337	5.6118	6.0112	5.021	5.2273	6.4994	3.6781	3.0924	5.477
PSMD6	0.111	-0.364	-0.5291	-0.963	-0.2934	-0.8678	-0.9546	-0.8135	-0.2362	-0.6304	-0.7084	-0.6237	-0.8288	-1.0116	-0.304	-1.6574	-0.1297	-0.7859	-0.9379	-1.2042	-0.8339	-0.7539	-0.776	-0.7884	-0.1536	-0.2498	-0.0469	-0.3076	-1.041	-0.6416	-0.4699	-0.3677	-0.55	-0.5166	-0.5628	-0.9078	-0.5886	-0.6873	-0.4941	-0.6804	0.1953	-0.1665	-0.041	-1.1392	-0.7934	-0.5907	-0.5585	-0.4461	-0.2987
HEMK1	2.2007	3.1882	1.8516	2.2354	3.6171	2.4712	2.9787	2.6938	2.0243	2.9098	3.8369	2.2693	3.5583	2.9358	2.9648	3.0027	2.8207	2.5934	4.101	3.3978	3.437	3.5957	2.4311	3.2918	2.466	1.4292	2.0986	3.2211	2.654	2.2931	2.1979	3.7866	3.4529	4.2048	3.6076	3.1152	2.4576	4.0985	3.6814	2.6942	2.6631	1.5311	3.4634	3.0772	3.0559	2.6436	2.9484	3.8669	2.2029
RBMS3	-0.1408	0.7621	0.1204	-0.0619	-0.3902	0.9508	1.0264	0.751	0.8139	0.2277	0.2786	-0.3715	0.9657	-0.1001	0.3595	-0.7155	1.2116	-1.1329	-0.4501	0.545	1.0772	0.6012	0.7075	0.9123	0.9516	0.5519	-0.3733	0.2327	0.0482	1.0642	0.0731	1.301	0.8852	-0.5756	1.1237	0.4813	1.0058	0.8424	0.119	-0.4442	0.606	-1.0029	0.8663	0.3414	0.7723	0.8016	-0.2109	0.6267	0.5926
ACVR2B	-0.8546	-0.7884	-1.0801	-1.074	-1.3585	-0.0619	-0.1156	-0.8546	-0.304	-1.3111	-0.9971	-0.0786	-0.074	-0.7298	-1.3659	-1.6171	-0.3437	-0.9942	-0.4442	-2.1016	-1.1943	-0.5842	1.3161	-0.9885	-1.1392	-2.3437	-0.6484	-1.2076	-1.1297	-0.9078	-1.6082	-1.1109	-0.811	0.275	-1.7084	-1.662	-1.0029	-1.5105	-0.3752	-1.9546	-1.5105	-2.4266	-1.041	-1.3004	-1.0985	-1.5606	-1.5437	-1.9269	-2.152
CCDC54	0.4895	NA	NA	NA	NA	NA	NA	-0.9269	NA	NA	NA	NA	0.308	NA	NA	NA	NA	NA	NA	NA	NA	NA	NA	0.7941	NA	NA	0.2473	NA	0.544	-0.8084	NA	NA	-0.0087	NA	NA	-0.7131	NA	NA	NA	NA	NA	NA	NA	NA	NA	NA	NA	NA	NA
RAB6B	1.0929	-1.0291	1.0807	0.1686	0.3403	-1.1584	-1.8211	-0.7322	-0.8186	-1.6038	-0.7131	-1.221	0.1296	0.3346	1.1164	-1.776	-0.0043	-1.4779	2.1499	-0.9078	-1.3846	0.0086	2.988	-0.7588	1.0969	-1.2828	0.184	-0.3789	0.5656	-0.6461	-0.1297	1.3907	-1.4305	0.0949	-0.889	-1.4305	-0.3201	0.0552	0.5714	-2.0893	-1.5228	-1.1297	-1.0801	-1.074	-0.2688	-0.8783	0.6145	-1.4112	-1.2793
CD86	3.854	5.1898	4.9914	4.8334	3.2656	4.1914	4.1859	3.8298	2.9533	3.4764	3.8258	4.4568	3.7388	4.1449	4.6633	3.3406	3.0347	3.6971	4.0968	4.1359	4.4796	4.2683	3.1322	4.3667	3.2861	4.5928	4.0108	4.2817	3.585	3.1263	3.5753	3.7027	4.3889	2.8422	4.3125	4.5072	2.6866	4.9616	4.0233	3.855	3.8084	4.5141	4.1043	4.4114	4.568	4.4835	3.7623	4.5771	4.067
NICN1	0.5984	1.6443	0.0286	0.0607	1.6866	0.7031	0.8922	0.8041	0.537	0.6012	1.2141	0.2302	0.1827	0.4297	0.9855	-0.3456	0.8327	0.3994	0.827	0.6107	1.2558	0.9411	0.4926	0.8065	-0.3474	-0.2226	0.7604	0.903	-0.1109	0.4244	0.0086	1.8168	1.3208	0.9138	0.5898	0.338	0.2129	0.8976	0.7312	1.025	0.976	0.1953	1.4662	0.301	0.4276	0.0272	0.3774	0.9935	0.3829
GATA2	-0.3603	-1.5564	-0.5735	-0.5437	-1.685	-0.5886	-1.1681	-0.7515	-0.6967	-0.9269	-1.1584	-0.3004	-1.6126	-1.1361	-0.8186	-0.5756	-0.5312	-1.0529	0.0963	-1.2758	-1.2723	-1.1552	-0.9351	-0.0893	-1.2009	-0.7298	-0.5886	-1.1746	-0.9714	-1.1488	-0.881	-1.4074	-0.6484	-0.5105	-0.3111	-0.6712	-0.1746	-1.1488	-0.1504	-2.2379	-1.2142	-1.0291	-1.077	-1.2447	-1.0649	-0.2193	-0.9105	-1.6897	-1.3548
ZNF589	0.0482	0.3951	0.1648	0.7084	0.4168	-0.331	0.2141	-0.074	0.4125	0.3618	0.0949	-0.5332	0.5241	0.4372	1.184	-0.274	0.7111	0.2654	1.1903	0.8914	0.5685	-0.3147	1.0172	0.3471	0.4709	-1.3921	0.5099	-0.2828	0.5291	1.0875	-0.1617	1.6429	0.4457	1.1928	0.8221	0.5519	0.2016	0.2004	0.7519	0.4699	0.4255	-0.2243	0.1137	0.2437	-0.1536	-0.1456	0.2666	-0.0439	0.8906
ADAMTS7	0.2116	0.2975	0.1725	0.6554	0.3951	0.3045	0.7329	0.6754	-0.3237	-0.4208	0.2091	0.3984	0.606	0.7999	0.6116	0.8552	-0.4208	-0.1633	0.3707	1.0222	0.3785	0.5955	0.1941	-0.2159	-1.0087	0.0963	-0.4901	0.1865	0.419	-0.1877	0.2091	-0.0233	-0.0831	-0.0908	0.2845	-0.2176	0.6645	0.4803	-0.1795	0.2786	-0.0321	0.1609	0.0786	0.144	0.1865	-0.0262	-0.417	0.4875	-0.2109
FOXL2	-4.6331	-4.7681	-5.0023	-4.7524	-3.774	-3.7661	-4.2324	-4.3019	-5.0685	-2.5907	-5.0979	-4.673	-1.3328	-3.8242	-3.6224	-3.5769	-3.6475	-5.8531	-4.3599	-5.0493	-4.4675	-5.0783	-0.1297	-4.8783	-4.737	-4.7839	-5.5262	-4.1636	-5.1178	-5.0831	-4.6082	-4.6915	-5.3748	-5.3511	-3.6188	-5.0398	-4.3481	-4.2737	-4.4328	-4.5429	-3.7009	-2.9885	-4.9346	-4.8531	-5.1584	-2.8678	-4.3511	-4.4266	-3.2243
EIF2B5	-1.4901	-1.1424	-1.1488	-1.7037	-1.3997	-1.5864	-1.6394	-1.4501	-0.4921	-0.9024	-1.4982	-1.2042	-0.9187	-1.7418	-1.6943	-1.0529	-0.3902	-0.6735	-1.527	-2.071	-1.077	-1.2009	-0.8494	-0.8783	-0.4739	-1.8059	-1.9771	-1.6215	-1.1078	-0.5995	-1.9379	-0.8678	-0.9743	-0.6804	-1.3884	-1.1976	-1.191	-1.5353	-1.7959	-1.0985	-1.7563	-1.8997	-1.6758	-0.6416	-1.3884	-0.8651	-1.8836	-1.7466	-1.8468
WDR53	-1.1203	-1.074	-0.5649	-0.7515	-0.8262	-0.2059	-0.6193	-1.1681	-0.5208	-1.2828	-1.0174	-0.394	-0.5374	-1.3959	-0.9518	-0.6689	-0.6394	0.1217	-0.6506	-0.9434	-1.4501	-1.0589	-0.0695	-1.1877	-0.749	-1.0029	-0.9546	-0.8084	-0.5395	-1.1266	-0.4739	-1.0203	-1.1424	-0.8863	-1.1552	-1.3696	-1.0439	-0.5374	-1.5187	-0.5023	-0.6781	-0.0058	-0.6597	-0.6259	-1.1617	-0.6038	-1.0291	-0.3997	-0.8783
WDR52	2.4521	1.7816	-0.7131	1.8887	1.1197	2.1144	3.0016	3.4195	2.168	1.1375	1.2648	1.3696	1.3718	0.5008	-0.0985	2.5524	2.207	0.5539	1.6567	1.512	0.8041	2.3222	0.9694	2.2116	2.5854	1.7887	0.6763	2.8296	2.3196	2.0638	2.2129	1.6411	1.8957	1.4436	1.9686	1.8221	1.8339	1.8205	1.4683	0.7664	1.1124	2.1489	1.6672	1.3768	0.2461	1.3973	0.1467	2.7736	1.7949
SLC12A8	0.8663	-1.462	0.6022	-0.16	-0.889	-1.0321	-1.662	-1.0529	-0.3997	-2.3659	-3.3076	-0.1001	-0.3921	-0.3865	-0.4422	-0.144	0.0426	-0.3255	-1.5146	-1.2447	-1.9105	1.0257	-1.3183	-2.5649	-0.606	-0.1993	-0.6666	-1.816	-0.6689	-0.0589	0.52	-0.5756	-3.3674	-1.3771	-2.8678	-1.6038	-0.1795	-2.482	-1.0985	-0.041	-0.737	-1.3585	-0.811	-2.816	-0.7686	-0.7298	-0.2379	-0.3401	-0.3548
SH3BP2	1.1519	0.4372	0.189	1.0307	0.3707	1.148	0.2277	0.3437	0.1596	0.4854	0.0496	1.5984	0.5666	0.6645	1.1596	0.0426	0.5675	0.7502	0.2738	0.648	1.3329	1.1084	-0.9078	0.3057	-0.0544	-0.2345	-0.2881	0.0086	0.1776	0.6906	-0.0203	0.6369	0.3785	-0.3273	0.2951	0.1414	0.6663	-0.1828	0.726	1.1693	0.434	1.229	0.5878	0.1903	0.5069	1.4839	-0.6804	1.2998	1.3196
CCNG2	2.0218	1.0433	0.8742	0.3516	0.9501	0.3528	1.0022	0.5801	0.1532	1.6271	1.3528	0.1545	0.6173	1.4415	1.3885	-0.4016	0.4383	1.0321	0.9161	0.9561	0.4854	1.1782	1.4751	0.8139	1.291	2.068	1.5326	0.6517	1.2277	0.9479	1.8375	1.6383	1.0779	0.5743	0.8139	0.6313	1.1137	0.2004	0.542	0.809	1.7472	0.6443	1.3989	0.751	0.3311	1.1263	0.5878	1.3288	1.291
WDR19	-2.4266	-2.8997	-1.3328	-2.1976	-0.7612	-1.9269	-1.6038	-1.4344	-2.1329	-1.8573	-0.5105	-2.0954	-0.725	-1.0801	-1.0262	-1.1424	-1.6712	-1.3959	-0.0725	-1.0145	-1.7322	-1	-1.041	-1.5692	-0.897	-0.9241	0.0468	-0.1617	-1.2653	-2.3884	-0.7661	-1.3659	-0.0087	-0.897	-0.771	-1.4779	-2.9771	-0.4659	-0.5649	-1.4189	-1.2243	-1.8836	-1.8262	-1.7322	-1.3183	-0.7909	-1.0954	-1.6529	-0.3129
ARHGAP24	1.0007	2.7572	1.7088	2.5678	2.0932	2.7422	3.0888	2.6081	1.6079	3.0202	2.3876	1.201	0.9161	1.8922	2.988	-0.2042	1.9107	1.5405	1.3109	2.4125	2.451	2.8076	2.8184	3.4816	1.7557	1.1217	1.5993	1.5519	2.3567	2.2705	0.9978	2.4122	1.0813	0.8616	2.6599	3.4634	2.1355	2.4268	1.0524	0.9305	0.9627	0.9084	2.4295	3.4712	1.9657	2.1037	1.2702	2.1982	2.2857
MGST2	0.9046	0.7066	0.2928	1.0718	1.5641	1.24	0.9964	2.147	0.9123	0.929	0.9184	0.6192	1.0022	0.4998	1.1686	1.0724	0.818	1.6164	1.0391	0.8891	0.8734	0.8711	0.4844	0.7672	0.7004	-0.0816	0.7999	1.3857	0.3951	1.9482	0.6763	2.1894	0.9419	0.6862	0.6452	1.2091	0.7553	0.745	0.9686	0.8969	0.8639	1.6079	1.3185	0.7031	0.9328	0.8536	1.2123	1.3156	1.1355
CTSO	3.61	2.2324	3.3248	1.3685	2.8026	2.3291	1.848	1.9007	3.3909	2.4602	2.7318	1.9877	2.0986	1.9264	2.4523	0.5231	2.5423	2.8568	1.6964	2.1846	1.7398	3.1731	0.3127	3.0569	3.0264	1.9822	2.5321	3.433	1.7966	4.8104	2.3228	2.5543	3.4607	2.4544	1.7732	2.6886	2.0391	1.7338	3.1112	3.5644	2.6109	2.3477	3.2603	2.8673	2.7084	2.3193	2.3898	2.9574	2.9159
SC4MOL	-1.5187	-2.2934	-1.9434	-2.816	-2.2723	-1.3437	-3.1714	-1.2863	-0.9574	-1.0203	-2.6259	-1.873	-1.2688	-2.889	-3.0469	-2.3364	-1.5437	-2.8365	-2.4422	-3.7879	-1.9269	-2.5064	-2.1329	-1.7418	-2.1392	-1.6126	-2.7959	-0.1665	-3.3076	-1.0893	-2.3884	-1.6082	-1.5649	-1.482	-3.4723	-1.6304	-2.3733	-2.5395	-1.5606	-0.0985	-2.1779	-1.9885	-1.9714	-1.7909	-2.5995	-2.1584	-1.7037	-2.9105	-2.5821
HERC5	0.3707	-1.415	-1.2243	1.1635	-0.9658	0.6443	-0.125	-1.191	-0.0395	-0.5166	-1.3659	0.3045	-0.7784	-1.4189	-0.5995	-2.4344	-0.152	1.0264	-1.1297	-0.5995	-1.3622	-1.1297	-3.1714	-1.9885	-0.0277	-0.7346	1.1674	-1.1109	1.1283	-0.8783	-0.462	-1.6171	-1.8783	-2.5228	-0.4779	-1.7179	0.0922	-0.1392	-1.2758	0.1979	-0.2987	0.3962	-0.6484	0.2179	-1.8468	-0.8314	-1.7959	0.3448	-0.4228
ACTA1	-0.3827	-1.1584	2.7598	-1.2176	0.3414	-0.5187	-0.488	-1.0029	-1.221	0.7502	-1.5395	-0.3585	-1.3696	-1.2447	-1.0029	-0.1219	-0.9379	-1.2653	0.3718	-1.2898	-0.606	4.2456	-2.4035	-0.5291	-1.1424	0.4222	-2.7179	-1.6259	-0.8186	-0.8186	4.4053	-0.3715	-2.0469	-1.5437	0.4049	-0.2881	2.0433	0.2654	-2.2584	-1.074	-1.8314	-0.3865	-1.4074	-0.486	-0.417	-0.7037	-1.1266	-1.458	1.5155
CXCL5	-3.5649	-6.5735	-0.9885	-4.6878	-4.8406	-4.0374	-4.8489	0.6079	-2.3808	-2.7661	-3.2379	-6.1178	-6.6153	-3.3076	-2.8573	1.5484	-2.9105	-4.2082	-3.5649	-3.1078	-5.7959	-3.0233	-5.1897	-4.7065	-6.6439	-0.699	-4.4707	-6.138	-2.9105	0.1712	-3.3335	-3.6785	-5.2379	-6.1278	-5.7486	-5.8868	-6.2765	-4.9346	-4.5873	2.1434	-3.4485	-6.4173	-3.673	-6.2653	-6.3808	-5.8365	-4.7486	0.1648	-1.8417
ACSL1	2.3573	2.0493	0.6535	1.5064	0.8074	1.4942	1.3879	1.184	1.4568	0.9819	1.7172	0.263	1.2588	3.0976	1.8504	1.0022	1.3454	1.8416	0.8246	0.774	1.1916	2.662	-0.2969	0.6996	1.0711	1.0531	0.9336	1.3167	1.2815	1.4942	2.1773	1.1329	-0.1109	1.7527	0.669	1.5003	1.7566	1.5568	1.9642	1.8078	2.2552	0.7519	2.2726	1.2116	0.7527	1.2209	0.9038	1.2091	1.6425
CSN1S1	-0.771	0.1712	NA	-0.881	1.7949	-1.2447	0.5311	0.3606	-0.4779	0.0272	0.0328	0.8057	0.4436	0.6229	NA	-0.7322	0.058	0.54	0.0731	0.2821	-0.5458	0.3561	0.434	0.1674	0.5898	0.8631	NA	0.6069	-0.1795	0.5898	-0.5002	0.0496	0.0868	-0.1763	NA	-0.2328	0.0663	-0.3677	NA	0.1545	0.0663	0.8359	-0.4305	0.6229	2.0489	0.1401	NA	NA	0.6434
KIAA1627	0.542	0.4265	0.2116	0.7672	0.8797	0.5955	1.0007	0.6173	1.0342	0.5211	0.8131	0.5331	0.3561	0.7163	0.5588	-0.4247	1.0398	0.6267	1.5175	0.6554	0.7587	0.7715	0.5079	0.7816	1.0759	0.6736	0.7312	1.0881	0.7198	1.3657	0.7216	0.4865	1.0552	0.9731	0.5008	0.9928	0.7277	0.9107	0.8074	1.0531	1.1966	0.852	0.8488	0.7816	0.3068	0.9358	0.5331	0.8041	1.1037
ZNF185	-0.415	-1.486	-1.0058	-1.6484	-0.9105	-0.4442	-1.7612	-0.7686	-1.1714	-0.7934	-2.2584	-1.8262	-0.9799	-0.6735	-0.8186	-0.1109	-0.8443	-0.1219	-1.4112	-1.6349	-1.8468	-1.7226	-1.9885	0.4297	-0.5951	-0.9187	-0.897	-1.4035	-1.462	-1.5187	-0.737	-1.527	-1.4779	-2.035	-1.9434	-0.6574	-1.1844	-0.706	-1.5479	-1.0203	-0.5374	-0.1877	-1.5907	-1.3846	-1.1078	-0.7735	-1.0985	-0.5479	-0.8468
KIT	-0.0306	-0.5564	-0.9159	0.9351	0.7587	-0.662	0.7251	0.4383	0.6835	1.2744	-0.0634	0.8536	0.4255	1.4103	0.8584	-1.4739	0.4016	-0.4461	0.7647	0.3807	-0.1472	2.2141	-3.9726	1.4547	0.4947	0.4844	1.9146	0.3127	0.7757	-0.1392	0.3896	1.76	0.605	-0.1861	1.3879	0.9275	0.6544	-0.4639	1.0236	-2.3808	-0.8084	0.6844	1.0759	-0.2498	0.0172	0.111	3.9021	0.5281	0.7277
FLJ23191	0.9797	3.1303	3.5692	2.0151	4.2048	-1.7563	3.6724	2.4847	2.9231	3.6837	3.0941	1.5049	2.1519	2.0169	2.144	-0.9324	3.4738	0.3528	4.6865	1.9978	2.451	0.474	2.5445	4.2802	2.763	4.8146	4.1465	4.2265	1.1916	3.2651	1.4195	3.9203	4.7708	0.0813	2.7388	2.6171	2.1313	1.7874	2.9753	-0.5585	5.128	0.6844	2.5962	3.5361	2.117	0.0676	2.1702	1.9256	2.662
MGC10981	-1.0087	0.1177	0.6173	1.7811	1.8082	0.3311	-1.2379	0.1763	-0.8997	-1.7084	1.6987	-3.4787	0.4947	-2.2653	-4.227	-1.5564	0.9077	-3.6242	0.585	-1.0649	-1.9546	-3.6153	-3.2515	0.4265	-0.3328	-0.0014	-4.7563	-2.662	-2.9658	-0.0247	-4.1304	1.4147	1.1408	1.8856	-1.2009	2.4691	-4.1354	0.0356	1.3768	-3.6767	2.0569	-1.699	-0.3292	1.6599	0.9635	-4.3599	0.6248	1.2928	-1.5023
GSTCD	-0.8009	-0.458	0.0101	0.5099	-0.0043	1.319	-0.6416	-0.6394	-0.4403	-1.9324	-0.8339	0.1454	-0.3219	-0.0786	-0.6416	-0.2653	0.0129	0.8286	0.517	0.5221	-0.2636	-1.077	2.3918	-1.2758	-0.46	0.8205	0.2425	0.4147	-0.226	0.4287	0.6745	0.2473	-1.304	0.6969	-0.9971	-0.0695	0.0072	0.7312	0.3696	-1.2619	-0.4055	-0.0755	-2.0529	-0.7515	-1.4982	0.8139	1.5922	-0.226	-0.2481
TACR3	NA	NA	NA	NA	NA	NA	NA	NA	0.1801	NA	NA	NA	NA	NA	NA	NA	NA	NA	NA	NA	NA	NA	NA	NA	NA	NA	NA	NA	NA	NA	NA	NA	-0.0189	NA	NA	0.3022	NA	NA	NA	NA	NA	NA	NA	0.0635	NA	0.7941	NA	NA	NA
FLJ21511	-2.3884	-2.1456	NA	-1.2042	-2.4112	0.2892	-1.1943	-2.2653	-0.9214	1.6206	-2.8365	-3.1203	-2.2934	-3.1456	-3.0589	-3.0233	-0.5585	-2.6897	-1.699	-2.2863	-1.0439	NA	-1.8314	-0.1504	1.0349	-2.1584	-2.4344	-2.2042	-0.7084	-2.6082	-1.873	-2.077	-0.9942	-1.1552	1.7895	-3.6547	-1.8943	0.1283	-1.5146	0.5627	-3.2934	-0.5002	-1.4228	-0.3789	-2.3076	-2.4344	-1.5864	-1.6082	1.0766
SLC9A7	-0.3902	0.1177	-0.4286	-0.1392	-1.3437	-0.4131	-1.5995	-1.3183	-0.9105	-1.9602	-0.8863	-0.3237	-0.8546	-0.9159	-0.4521	-1.2934	-0.9024	-0.5886	-1.3733	-0.074	-0.8625	-1.3255	-0.7108	-1.5649	-1.3771	-1.8943	-1.6712	-1.5437	-1.0589	-1.1047	-0.3566	-0.364	-1.2109	-2.3004	-1.3959	-1.3585	-0.2916	-0.8678	-1.3659	-1.4422	-1.2723	-0.8135	-1.5312	-1.6804	-1.3846	-0.889	-1.2109	-1.0469	-0.9214
CHIC2	0.224	-0.3997	-0.3585	-0.0725	0.0454	0.2216	-0.0043	0.3173	-0.035	0.433	-0.1943	-0.2498	-0.1078	-0.2653	0.0014	-0.5002	0.1622	0.4875	-0.2009	-0.0203	-0.5105	0.0186	-0.125	-0.0862	0.1532	0.5281	0.2798	-0.4403	-0.331	0.7163	-0.4266	0.537	-0.074	-0.5146	-0.0786	0.3929	-0.016	-0.2447	-0.3659	0.3092	-0.1697	0.2425	0.0786	-0.0145	-0.8211	0.1003	0.2376	0.3774	0.3685
MAP2K1IP1	0.7277	0.7974	0.24	-0.0649	0.8945	0.0936	-0.0695	0.5251	1.679	1.2116	0.4988	0.0976	0.175	-0.4247	0.2079	-1.2863	1.2957	1.0447	-0.1109	-0.1424	0.539	0.7163	-0.1926	0.9782	1.4044	1.1375	0.903	1.3121	0.4038	1.595	0.9351	1.7515	1.2004	0.8408	0.103	0.91	0.0454	-0.685	0.6727	1.1564	0.7883	0.6799	1.1738	0.8821	0.1375	1.107	1.0043	0.4626	0.9084
FLJ11850	NA	NA	NA	NA	NA	NA	NA	NA	NA	NA	NA	NA	NA	NA	NA	NA	-0.2009	NA	NA	NA	NA	NA	NA	NA	NA	NA	NA	NA	NA	NA	NA	-0.0174	-0.0529	NA	-0.0365	NA	NA	NA	NA	NA	NA	NA	NA	NA	NA	NA	-0.0174	NA	NA
PDLIM3	3.6276	3.0813	4.5546	2.4236	3.9098	1.8335	3.441	2.1998	2.8955	3.8963	1.6758	2.4131	2.4071	3.5348	2.4468	1.8016	3.2579	2.4452	2.0694	3.853	0.5859	4.0215	0.0854	2.2567	3.4356	3.8258	3.0025	1.1427	3.4209	2.7338	3.8817	4.2884	1.6116	2.108	3.6124	2.6007	3.6381	3.6264	2.6911	2.4972	1.359	2.7104	3.7312	2.1372	3.433	0.1916	3.168	3.6633	3.5801
FLJ12993	2.3547	5.5301	3.3868	3.7268	5.8268	1.9146	0.7321	0.4751	3.2021	-0.1345	1.338	3.9699	2.438	1.7058	0.0909	-1.0559	2.3525	3.9069	0.8821	3.5741	1.0545	2.4733	5.0005	0.7545	1.025	0.3663	-0.1313	1.0122	3.1898	0.3138	1.1434	3.7268	-0.4228	2.9479	2.0303	3.9136	3.3561	0.7715	2.0649	-0.2898	0.6498	4.594	0.1852	1.0881	2.8881	1.3144	1.5821	1.6736	1.3768
MSX1	-2.2723	-2.776	-2.2723	-2.5395	-2	-2.8468	-2.662	-2.5649	-3.071	-2.4344	-2.6529	-2.8262	-2.2653	-2.2723	-2.6804	-1.9546	-2.8678	-3.1714	-1.5606	-2.4901	-3	-1.7809	-2.8365	-2.6259	-3.458	-2.1078	-2.662	-2.7179	-3.0469	-2.8262	-2.816	-3.3076	-2.9214	-1.9771	-2.3004	-2.7959	-2.1203	-2.482	-3.0116	-2.8678	-2.9658	-2.3585	-1.9105	-2.5821	-2.5312	-2.9658	-2.4659	-2.6529	-2.5146
PPWD1	-0.4055	0.4678	0.0101	0.2166	0.8961	0.1878	0.86	0.3918	0.4425	0.2618	0.1519	-0.191	-0.1681	0.6654	0.5018	-0.9658	-0.3076	-0.0589	0.6826	0.8246	0.0201	-0.2176	0.9701	0.2678	0.5489	0.3092	0.5627	0.6304	0.84	-0.2328	0.3068	0.539	0.1388	0.1362	0.6526	-0.1078	0.294	1.1283	0.2928	-0.3237	0.7924	0.8164	0.4823	0.2654	0.4136	0.5859	0.08	-0.2671	0.3663
APBB3	-0.0395	1.275	-0.4344	0.7424	-0.3183	-0.0072	0.5869	0.4865	1.0868	0.2963	0.2546	0.1622	0.8663	0.9161	0.2642	0.2473	0.3618	0.2845	-0.0101	0.3561	1.159	1.2881	-0.4074	0.3807	0.7093	-0.8237	-0.9942	-1.2793	0.308	0.7163	-1.1078	1.2491	0.2041	0.9891	0.5519	0.3448	0.4688	0.517	-0.2775	0.1401	-0.4659	0.0058	-0.3511	1.1738	0.6276	1.2339	-1.1109	0.474	0.0949
PCDHB1	-0.3255	NA	NA	NA	NA	1.051	NA	NA	NA	-0.963	NA	NA	NA	NA	NA	0.1003	NA	0.3196	NA	NA	0.2004	NA	0.119	NA	0.516	0.0072	NA	NA	NA	NA	NA	NA	0.0014	NA	NA	0.1622	NA	NA	NA	NA	NA	0.0014	NA	NA	NA	NA	0.103	NA	NA
BIRC1	2.5743	2.7117	1.6799	2.9355	1.6781	1.0902	2.6031	1.6512	1.852	2.3782	2.3771	1.5763	1.972	2.6262	3.4141	1.4668	1.802	3.1562	2.4691	2.5	1.8934	2.0423	1.6332	2.6531	2.1709	1.5936	3.6427	2.2525	3.0969	1.9505	2.3749	2.0317	2.0032	2.0507	3.104	1.568	2.081	1.6369	2.7257	2.2945	2.433	1.8016	3.2743	2.1299	1.8456	1.3185	0.7442	3.0673	3.3618
39147	-0.6148	0.2702	1.3896	1.3357	0.4082	0.4276	0.6906	0.0635	0.0607	-0.4679	0.6154	-0.9051	-0.0923	0.3674	-0.2602	-0.4639	-0.488	0.3033	0.1084	0.6192	-0.0529	0.2485	0.8294	-0.7884	-0.5002	0.3045	0.3718	0.224	0.4875	-0.4035	0.0663	0.6915	-0.4719	-0.5886	0.4049	0.123	0.4906	0.9767	-0.016	0.0496	0.0072	0.1865	0.4542	0.6201	0.1545	0.5489	1.4865	1.2881	-0.2294
CRR9	-0.6082	0.3173	0.6257	-0.4759	-0.6597	-1.3622	-0.9406	-1.0087	0.189	-1.5105	-0.3201	-1.3111	-0.3237	-0.5649	-1.4112	-1.5864	-0.3771	-1.4112	-1.5864	-0.8997	0.08	-0.3902	-0.2758	-0.9187	-0.462	-0.7612	-1.5228	-1.2723	-0.9546	-1.0801	-1.0801	-0.4016	-0.3401	0.0144	-1.1488	-0.0801	-0.417	-0.5995	-1.3076	-1.5995	-1.3771	-1.2413	-0.873	0.6924	0.433	0.3807	-0.7984	-0.8783	-1.8314
THOC2	-0.4719	-0.3902	0.1414	-0.7274	-0.3884	-1.4266	-1.3147	-1.1976	-0.1828	-0.1844	0.0621	0.537	-0.567	-1.304	-1.6349	-1.2447	-0.0908	-0.8365	-0.4189	-1.1456	-0.2042	-1.5479	-1.1203	-0.6082	-0.0786	-1.0679	-0.8339	0.3115	-0.8997	-0.2515	-1.5522	-0.8836	0.0072	-0.2619	-1.114	0.4308	-0.5002	-0.0893	-0.4759	-0.4074	-0.8494	0.7022	-0.8625	0.384	0.2606	0.0963	-1.1811	-0.9914	-0.7084
FST	-3.2243	-2.9658	-0.2059	-0.3827	-3.4407	-3.1714	-2.8997	-3.0469	-0.9574	-1.889	-2.3147	-2.5821	-0.5995	-0.5374	-1.5522	-1.3771	-2.071	-3.1844	-2.1649	-0.6394	-3.7103	-1.8262	0.4895	-3.2653	-2.7274	0.5241	-2.2243	-2.6259	-1.9771	-1.3884	-2.7084	-4.8614	-3.7899	-3.9062	-0.8391	-1.8059	-0.5105	-3.2243	-3.1976	-1.0291	-3.0831	1.5979	-2.6082	-1.2447	-1.8211	-2.9105	-2.5649	-3.851	-0.5105
UNC5A	-0.771	-0.9574	-1.2413	-1.6804	-1.4266	-1.6439	-1.0619	-1.2758	-1.074	-1.3846	-1.1016	-1.1488	-1.4779	-0.8757	-0.8391	-0.5778	-1.3959	-1.2619	-1.4461	-1.6897	-1.0619	-0.9187	-0.8863	-1.737	-1.7466	-0.9518	-1.9379	-1.5353	-1.6943	-1.5864	-1.2481	-1.9828	-1.3474	-1.2898	-2.3004	-0.7515	-1.2969	-0.9214	-1.0087	-0.4286	-0.9159	-1.0862	-1.1844	-1.1329	-1.5864	-0.6804	-1.462	-1.0985	-1.5353
TRIM36	-2.1714	-1.2176	-1.462	-0.6781	1.7795	-1.2447	-0.221	-0.8009	-2.2515	-0.0831	-0.5995	-2.2515	-0.2688	-2.0831	-0.4131	-0.3383	-0.5416	-0.873	1.4787	-0.2515	-1.8678	-3.0954	-3.1976	-0.2294	-1	0.1661	-2.041	-1.3147	-0.3696	-1.1488	-2.1456	-1.9602	-1.2345	-0.7466	-0.6897	-1.8365	-0.0072	0.0172	-0.7298	-3.5262	-1.2277	-1.0954	-0.5778	-0.9379	-2.7274	0.1204	-2.9105	-0.1062	-0.7037
MGC21644	0.058	-0.2396	-0.243	0.384	0.7031	0.7242	0.1454	0.5578	1.101	-0.6943	-0.4228	0.3885	1.2079	-0.2481	-0.1746	0.875	-0.6574	-0.1714	-0.2987	-0.114	0.4906	-0.5907	0.1941	-0.1697	0.1414	0.127	-0.6416	-0.3419	-0.5735	0.7022	-0.2026	0.7075	-0.2498	0.0129	-0.3696	-0.2987	0.1878	0.3516	0.0854	-0.5166	-0.3165	0.5656	-0.1376	-0.3865	-0.3004	0.4521	-0.9856	0.1865	-0.0634
WDR36	-0.482	-0.0725	-0.6689	-0.2916	0.0881	0.1635	-0.2294	-0.4208	-0.8059	-1.4659	-0.3511	-0.725	-0.2863	-0.4305	-0.1234	-0.9132	-1.5778	0.1097	-0.1345	-0.221	-0.8135	-1.0862	0.1763	-1.4305	-0.685	-0.7298	0.0158	-1.1976	-0.6873	-1.5146	0.1137	-0.7322	-0.9971	-0.771	-0.3566	-1.6349	-0.5973	0.3471	-0.331	-1.0954	-0.4305	0.1164	-0.2498	-0.7539	-0.9602	-0.013	-0.3603	-0.0604	-0.3147
MAML1	-0.9187	0.1309	-0.8084	-0.606	-0.2951	-0.1297	-1.0985	-1.3548	0.4297	-0.8314	-0.881	-0.2951	-0.454	-1.2379	-1.4982	-1.5821	-0.4461	-1.3696	-1.1714	-1.8468	-0.488	-0.5907	-0.9241	-0.4901	-0.1282	-1.6126	-1.6082	-1.2481	-0.5649	-0.4422	-1.6259	-0.5105	-0.456	-0.4403	-1.6082	-0.0985	-0.4208	-0.8997	-0.8599	-0.7515	-0.7661	-0.9051	-1.3111	-0.454	-1.415	0.6201	-1.2076	-1.8059	-1.4074
FLJ20125	-0.114	0.7562	0.338	0.2654	0.9664	0.473	0.8671	0.1375	0.2726	0.5261	0.4082	0.111	0.3033	0.1903	0.5361	-0.4699	-0.6215	1.0349	0.3561	0.433	0.1375	-0.1681	-0.1125	0.4573	-0.4325	0.3403	1.113	0.1043	0.6304	-0.5064	0.7163	1.7429	0.3231	0.2016	0.5945	-0.3129	-0.1488	0.6341	0.3231	-0.2863	0.719	0.8106	1.0482	0.7545	0.0186	0.6145	0.2203	0.8098	0.1375
CTNND2	-3.5683	0.7093	-3.2243	-1.2934	-1.5864	-3.5786	-3.3914	-2.8678	-2.3959	-2.9214	-2.5395	-3.3974	-3.9258	-3.3219	-1.9379	-3.5907	-3.6188	-3.0116	-3.8741	-2.9885	-4.1688	-2.7859	-3.3248	-2.7274	-4.3899	-3.6638	-1.3696	-3.071	-1.8943	-1.9658	-1.0233	-3.1329	-1.5649	-3.3748	-3.6767	-2.776	-3.2653	-2.077	0.224	-2.9771	-3.7959	-2.6712	-3.0954	-1.0801	-1.7179	-0.2775	-4.4868	-3.1584	-2.7274
CDKL3	-0.5043	0.2191	-0.6758	-0.5886	0.3448	1.2412	0.7075	-0.4659	0.1243	0.1506	0.3651	-0.5585	-0.6148	-0.5064	0.3231	-1.4982	0.0827	0.2116	0.4447	0.4049	0.2154	-0.527	0.175	-0.0262	-0.0058	0.7723	0.1362	-0.3364	-0.6193	-0.2775	-0.152	1.1706	-0.2671	-0.5995	0.1635	-0.7442	0.1519	0.9538	0.2916	-1.3111	0.0186	0.2975	1.0841	1.067	-0.8599	-0.0574	-0.2636	1.6982	0.3561
SKIV2L2	-1.7226	-0.462	-0.4016	-1.0469	-0.6461	-1.8059	-1.1297	-1.1943	-0.6574	-1.035	-1.4501	-1.3622	-1.6171	-1.6038	-1.3771	-1.7612	-1.816	-0.6016	-1.3111	-1.5353	-1.1172	-1.5312	-1.1361	-1.1617	-0.7084	-0.749	-0.7612	-1.0116	-0.9159	-1.3292	-0.9799	-0.1094	-1.1844	-1.0145	-1.0985	-1.6897	-1.6126	-1.1779	-0.9743	-2.041	-0.6666	-0.9602	-1.0529	-0.9324	-1.9324	-0.6643	0.4678	-1.6171	-1.221
STC2	-2.6712	-2.6804	-2.8783	-2.7959	-2.9214	-2.8573	-2.5564	-2.5995	-3.1078	-3.071	-2.7959	-2.9105	-1.8943	-2.3364	-2.5479	-2.2109	-3.1976	-3.2109	-2.5395	-2.699	-2.6171	-2.5735	-2.4901	-2.737	-2.6804	-2.4982	-3.5446	-2.9105	-2.9771	-2.7661	-0.4719	-2.6082	-3.1844	-2.2793	-2.5995	-2.889	-2.3437	-2.7179	-2.889	-2.5649	-2.9214	-2.7859	-2.8783	-2.699	-3.0116	-2.2723	-2.8783	-2.5821	-2.6804
ZNF300	-1.1456	-2.7084	0.8278	-0.152	-2.9885	1.4319	-1.8997	-0.706	-1.3076	-1.8211	-1.0985	-1.3884	-0.5564	-1.4659	-1.0954	-1.4228	-0.9856	-0.3902	-1.5353	0.4977	-1.662	0.2449	2.5303	-2.2109	-0.1681	0.2154	1.123	-2.699	0.7119	-0.9462	-0.5312	-3.8059	-3	-3.4901	-1.2584	-1.1329	-2.2723	0.1124	-3.1584	-0.7859	0.1097	-0.2723	-1.7661	-3.5047	-1.8262	-2.5564	1.3156	-0.191	-0.9296
GPR174	1.4206	NA	NA	0.3763	NA	NA	1.3829	1.473	0.519	1.7119	0.346	NA	0.5568	1.6093	0.3984	NA	0.157	2.3135	NA	NA	NA	0.7347	NA	0.4212	1.8331	NA	2.7366	NA	1.1922	0.8774	NA	NA	-0.0203	NA	1.6112	0.6164	NA	NA	0.0115	1.8065	2.7702	NA	0.9575	NA	0.7233	1.8229	NA	NA	0.7841
SLU7	0.275	0.7294	-0.1763	0.3277	0.774	0.7493	0.7841	0.5656	0.099	0.0566	0.3863	0.5509	0.9877	0.257	0.7587	-0.4461	-0.5995	0.7128	0.4895	0.52	0.364	-0.1031	0.5743	0.4885	-0.1943	0.7562	0.6544	0.6996	-0.0306	0.0072	-0.0634	0.7757	0.3045	0.0043	1.1217	0.541	0.2473	1.2054	0.5917	0.2606	1.1157	0.8568	1.5044	0.7527	0.2869	1.1865	0.5568	0.9797	0.605
PORCN	-0.4422	-0.1877	-0.5886	-0.9241	-1.191	-1.7809	-0.5395	-0.5692	-1.4901	-0.9743	-0.0291	-0.8288	-0.5778	0.0663	-0.55	-0.1536	-1.071	-1.035	-0.7809	-0.0529	-1.2243	-0.5208	-0.2793	-0.9546	-1.1714	-1.2619	-1.8678	-1.5228	-0.6394	-1.0439	-1.3364	-0.3585	-1.2243	-0.8288	-0.55	-1.1424	-0.1376	-0.3219	-1.1584	-0.074	-1.0469	-0.3511	-0.9799	-0.7131	-0.8009	-1.2142	-1.462	-0.0101	-0.737
DUSP1	2.3288	3.342	1.6211	2.7139	1.2209	0.6173	3.5059	3.332	2.3115	2.8828	3.6871	0.4147	1.157	3.4046	3.1536	-0.7131	1.9738	0.8608	1.9279	2.0101	1.9549	2.6663	0.4936	3.7377	1.722	2.2663	3.511	1.8392	3.4529	2.2534	1.7862	3.7388	2.6105	2.2657	3.8115	3.3115	3.0129	3.3757	2.84	2.497	1.5474	2.1871	3.0032	3.5484	1.6154	2.0043	3.6871	2.0721	2.6505
PRKAA1	-0.5886	-0.4074	-0.2109	-0.3622	-0.5907	-0.2243	-1.041	0.115	0.3763	-0.816	-1.2515	0.0043	0.2546	-0.7686	-0.7274	-1.4074	-1.2042	0.4179	-1.4228	0.2678	-0.1456	-0.7466	-0.5628	-1.0029	-0.6171	0.0286	0.2437	-0.4699	-0.3959	-0.5713	-0.6735	0.3391	-1.5312	-0.9885	-0.889	-1.3659	-0.6126	-0.9828	-0.873	-0.9051	-0.458	-0.2828	-0.6873	-0.5821	-0.737	-1.0233	0.9298	0.8262	-0.8314
MYOT	NA	NA	NA	0.4222	NA	NA	NA	NA	NA	NA	NA	NA	NA	NA	NA	NA	NA	NA	NA	NA	NA	NA	NA	NA	NA	NA	NA	NA	NA	NA	NA	NA	-0.0072	NA	NA	NA	NA	0.3346	NA	NA	NA	NA	NA	NA	0.3763	NA	NA	NA	NA
LECT2	NA	NA	NA	NA	NA	NA	NA	NA	NA	NA	NA	NA	NA	NA	NA	NA	NA	NA	NA	NA	NA	NA	NA	NA	NA	NA	NA	NA	NA	NA	NA	NA	-0.0203	NA	NA	NA	NA	NA	0.0243	NA	NA	NA	NA	NA	NA	NA	NA	NA	NA
SCAMP1	-0.776	0.2666	-0.2584	-0.5479	0.08	-0.4759	-0.6897	-0.0145	0.5568	-0.2828	-0.3492	-0.9658	-1.1811	-1.6349	-0.7834	-2.3808	0.3685	-0.4364	-1.2076	-1.1488	-0.4442	-0.897	-1.1714	-0.5479	0.2129	-0.4074	-0.6574	-0.6804	-1.2142	0.5974	-0.4501	0.2606	-0.1779	-0.6897	-1.4739	-1.5437	-0.6126	-0.6439	-0.567	-1.7131	-0.482	-0.0831	-0.331	-0.4266	-0.8314	-0.1408	-0.1504	-0.3419	-0.3474
CSF1R	4.497	4.7511	4.4175	4.9246	4.5311	4.4283	5.2095	4.6206	3.7803	4.585	4.9222	4.2211	5.0027	4.9449	5.2645	4.3212	3.9298	4.2319	5.0295	5.3201	4.5686	4.6496	4.1843	4.6949	4.0807	4.8768	4.0747	4.9439	4.3306	3.9069	4.1683	4.3709	4.6444	4.1619	5.1027	4.6645	4.6576	5.017	4.6954	4.8919	4.7197	4.4588	4.8812	4.8161	4.774	4.3889	3.8689	5.6502	4.887
CENPH	-2.7466	-3.5362	-2.2863	-1.873	-2.8783	-2.3659	-2.8468	-4.3868	-0.6897	-2.4659	-3.0116	-1.114	-2.3659	-3.0954	-3.7602	-3.5873	-2.3219	-0.7442	-3.4485	-4.2379	-2.2723	-3.0469	-1.0893	-3.3306	-1.6804	-3.8262	-1.7418	-3.2109	-1.8625	-2.8573	-2.7563	-2.7859	-2.3585	-3.4917	-3.4723	-4.0734	-2.6349	-2.9771	-3.0233	-2.5907	-2.816	-2.2176	-3.9479	-3.5632	-4.2877	-1.3585	-3.2934	-3.57	-3.0954
AKAP4	NA	NA	NA	NA	NA	NA	NA	NA	NA	-0.331	NA	NA	NA	NA	NA	NA	NA	NA	NA	NA	NA	NA	NA	NA	NA	NA	NA	NA	NA	NA	NA	NA	0	NA	NA	NA	NA	NA	NA	NA	NA	NA	NA	NA	NA	NA	NA	NA	NA
COX7C	0.4147	0.9716	0.3242	0.6332	1.4141	0.1674	0.7858	0.3584	0.5568	0.5008	0.8899	0.2461	0.0482	0.3323	0.7924	-0.0679	-0.0218	1.8168	1.0996	0.6808	0.0868	0.0158	0.856	0.5685	0.6192	0.2116	1.037	0.9313	0.8343	-0.0725	0.6517	1.4777	0.4372	0.7268	0.6388	-0.1156	0.058	1.2135	0.6471	0.2821	0.976	0.5499	0.5792	0.45	0.3561	0.9419	0.4823	0.7424	0.4212
IRX4	-4.7179	-4.5395	-4.5942	-4.2681	-4.8324	-4.3162	-4.2877	-4.3423	-4.8531	-4.7602	-4.5129	-4.2877	-4.5632	-1.3997	-4.2962	-3.4005	-4.7681	-4.7255	-4.227	-4.3778	-4.2737	-3.6547	-3.7466	-4.2136	-5.0734	-4.088	-3.9817	-4.8201	-5.093	-4.904	-4.772	-4.4868	-5.174	-3.6859	-4.5977	-4.4836	-4.2189	-4.357	-4.673	-4.0637	-4.5228	-4.458	-4.7999	-4.9346	-4.4143	-4.3047	-2.9885	-4.5262	-4.3778
CNOT8	0.7155	1.4688	0.3288	0.7066	-4.195	1.2016	0.9833	0.111	1.5612	1.0468	0.2618	0.4404	0.8914	0.6145	0.6817	-1.2969	0.679	0.5917	0.275	0.2388	1	0.8197	0.3907	0.7841	1.0328	1.0036	1.148	1.0043	0.2904	1.2023	0.099	1.5787	1.0391	-0.2671	1.0029	0.7119	-0.3529	0.3138	0.3391	-0.4719	1.0115	0.6897	0.8229	0.8246	0.1043	0.9723	0.7613	0.8472	0.7816
TERT	-3.5245	-2.9885	-3.7839	-2.5395	-3.1078	-2.8573	-2.699	-3.1584	-2.6897	-3.5446	4.4816	-2.5821	-3.0589	-2.2515	-2.9658	0.545	-3.4127	-1.9546	-2.7179	-3.2793	-1.9942	-3	-2.3884	-3.2515	-2.7563	-3.0116	-1.2109	-3.2109	-3.1078	-3.5113	-2.4344	-2.3884	-3.4771	-2.3884	-2.9324	-3.0954	-2.1976	-2.776	-2.7179	-2.3959	-2.5821	-2.5312	-3.1456	-3.3234	-2.5312	-2.9658	-2.1584	-0.5291	-3.035
TRAF3IP2	-0.3959	-1.1617	-0.5002	-1.4699	-0.7686	-0.1424	-0.9105	0.3173	0.2558	-0.4901	-0.7563	-0.0014	-1.5187	-1.5735	-1.2723	-0.6016	0.2216	-0.7037	-1.685	-1.8314	-0.749	-0.7809	-2.1329	0.6116	-0.4759	-1.6758	-1.8573	-0.3659	-0.7131	0.1217	-0.737	-0.6967	-0.1376	0.1401	-1.7515	0.1283	-1.1109	-1.5146	-0.9132	-0.7984	-0.6643	-1.527	-2.1203	-0.6326	-0.5649	-1.1424	-1.0174	-1.949	-1.458
TSPYL4	-0.5842	-0.7298	-0.038	-0.5886	-0.0058	-0.6416	0.1635	-0.3255	-0.4481	0.5724	-0.2328	0.1674	-1.0499	-0.4228	-0.7563	-0.8288	-0.1861	-0.3328	-0.4422	0.6173	-1.5479	0.099	-0.5864	0.1557	-0.5105	0.0272	-0.2828	-0.6193	0.257	-1.2076	-0.1125	0.4351	-0.2481	-0.3959	0.0257	-0.2881	-0.016	-0.3111	-1.3183	-1.6897	-0.6126	-0.7226	-0.7563	-0.3328	-0.1424	-0.9462	0.4668	-0.274	-0.4901
SLC17A5	0.4936	-0.6193	0.2726	-0.3058	-1.4383	-0.7515	-1.6349	0.8528	-0.0116	-1.6304	-0.9714	0.0827	-2.4035	-1.1424	-0.2379	-0.4521	0.3057	-1.8009	-1.3219	-1.4739	-2.3511	-1.1584	-0.4699	-1.8997	-0.8546	-2.0469	-1.458	-1.8365	-1.3147	-0.6082	-1.7084	-2.041	-1.3474	-1.8468	-2.4266	-1.2009	-0.8262	-1.191	-0.8135	-2.2584	-2.0174	-2.3219	-1.2009	-0.6016	-1.6712	-2.4344	-0.6484	-1.5353	-0.7179
SRrp35	-2.1976	-5.1228	-4.9658	-1.9771	-3.8468	-3.0954	-3.2243	-5.5804	-3.0831	-3.3076	-5.6953	0.4772	-2.9885	-2.6082	-3.1203	-5.1128	-1.9159	-3.0116	-5.9839	-2.5821	-3.1584	-1.415	-0.1329	-4.8448	-3.2515	-3.9908	-0.8943	-3.8303	-1.071	-5.4235	0.5772	-1.5951	-4.0303	-1.8365	-4.6047	-4.3452	-4.2406	-3.6082	-4.1354	-1.9942	-2.6529	-3.4707	-4.4204	-5.2598	-1.9546	-2.2723	-0.2969	-3.5581	-4.3659
GSTA4	-0.2515	-0.0679	0.8016	-0.8262	-1.3219	-1.2898	-0.1047	-0.9828	0.1991	0.514	0.5479	-0.1488	-2.2863	-0.9187	0.4147	-1.4779	1.9298	-1.038	1.6295	-0.3183	-0.6967	0.2228	0.3918	0.7459	-0.2076	0.1903	0.2963	1.33	0.2004	0.7347	-0.8211	-1.949	0.8432	0.518	-0.2636	0.8205	0.3254	0.3962	1.0201	-1.486	0.6897	-0.2775	1.1897	-0.3058	-0.462	1.254	-0.5713	-0.5291	-0.3328
FOXF2	0.6471	0.8663	0.0229	-0.0985	0.7638	-1.699	0.5724	1.9482	1.0956	1.7502	1.3724	-0.7637	0.929	0.9366	1.129	-0.0679	1.2216	-0.7661	-0.2447	1.2528	-0.2059	0.5821	0.8655	0.3918	0.8663	0.6799	0.5008	2.147	0.8049	1.852	0.0158	-0.5312	0.4212	-0.6506	1.8123	1.1667	1.6803	0.1506	0.3505	-0.226	-0.2723	0.848	2.0454	1.1421	2.105	0.2485	0.9826	0.5548	1.6535
BRP44L	1.0236	0.8049	0.6201	0.3528	1.434	-0.2345	1.5256	1.0895	1.1322	1.4662	1.4615	1.9015	0.6229	1.0335	1.3499	0.4093	1.6225	1.5479	0.9877	0.9553	-0.097	1.4297	-0.9406	1.3311	1.2104	0.893	1.7874	1.0236	1.1263	0.3448	1.6717	2.4082	0.9935	1.9572	1.0983	1.9642	0.8945	1.2582	1.177	1.0093	1.2546	0.3437	2.11	2.043	1.2141	0.6915	1.1309	1.1731	0.9833
PSMB9	2.1496	0.726	0.6295	1.3685	0.5529	1.6713	0.0663	1.1795	1.3674	0.6645	0.8766	1.4787	0.9441	0.6654	0.537	0.992	2.0161	1.6341	-0.9132	-0.55	-0.0218	0.6116	-1.7037	0.0454	1.8848	0.3885	0.6826	-0.6943	1.6276	1.2904	0.4212	0.6201	0.3414	-0.038	0.2714	-0.4093	0.0759	0.1852	0.3573	2.1909	0.9583	1.6069	0.2678	0.7949	-0.1001	2.2711	-1.7179	0.2666	0.2594
YIPF3	0.9169	0.5685	1.196	0.6772	1.2467	0.4308	0.308	0.2534	0.9848	0.1609	0.2558	0.5955	-0.1959	0.2166	-0.16	-0.8059	1.1525	0.8576	0.45	0.2154	0.0468	0.537	0.6978	0.184	0.6517	0.111	0.3951	0.7407	0.9305	0.6736	0.0663	-1.0262	0.6425	-0.48	0	0.763	0.9169	0.7111	0.1789	-0.152	0.0043	-0.0454	-0.0218	0.1979	0.3818	0.6079	0.6636	-0.2311	-0.3492
SRF	0.0594	-0.3419	-0.1779	-0.1313	-0.16	0.2191	0.157	0.2041	-0.7661	-0.2775	0.2179	0.1296	-0.0755	0.4071	0.5578	1.0144	-0.5437	-0.4228	0.0786	0.364	-0.038	-0.0014	0.7681	0.0129	-0.7809	0.5945	-0.706	0.4114	-1.0291	-0.6148	0.1349	-0.4325	-0.8494	-0.4481	0.3334	-0.2498	0.3796	0.726	0.0936	0.3516	0.2975	-0.1109	0.3068	0.3663	0.3885	0.2265	0.1763	0.5974	0.0566
BMP15	NA	NA	NA	0.4947	NA	NA	NA	NA	NA	NA	NA	NA	NA	NA	NA	NA	NA	NA	NA	NA	NA	NA	NA	NA	NA	NA	NA	NA	NA	NA	NA	NA	0.0086	NA	NA	NA	NA	0.1084	NA	NA	NA	NA	-0.5416	NA	NA	NA	NA	NA	NA
HIST1H3A	0.0201	0.3115	1.2642	0.6727	1.1814	1.5084	0.4647	0.8286	1.4478	1.1104	0.355	1.3763	0.2363	0.3807	0.251	1.0108	0.472	1.5256	0.6617	0.2253	0.2702	0.7022	0.224	0.9731	0.4103	0.4415	0.7181	0.7347	0.8205	0.7519	-0.2042	0.3763	0.5089	0.346	0.3045	0.9366	0.5743	0.8098	-0.0101	0.175	0.518	0.6098	0.4823	0.3471	1.224	0.406	1.0293	0.543	0.1966
HIST1H2BI	-1.6259	-0.4305	0.1827	-0.3696	-1.2277	-0.152	-1.9159	-0.816	-1.4228	-1.771	-0.9351	-0.3437	-0.8034	-0.9214	-1.6126	-1.1297	-0.1649	-1.2109	-0.6666	-1.1877	0.4362	-0.6349	0.4404	-1.5187	-1.041	-1.5522	-1.3328	-0.4659	-0.6148	-0.7346	-1.1552	-0.4461	0.4212	-1.0174	-1.6758	-1.662	-0.2311	-1.5778	-1.0801	-0.0634	-1.0831	-1.1976	-1.4659	-0.4228	-0.7131	0.0314	-2.071	-1.1078	-1.8417
HIST1H2BB	-1.4901	-0.5606	0.0115	-0.4093	-0.6804	-0.0101	-1.5735	-0.7442	-1.662	-1.4501	-0.6371	-0.3383	-0.6416	-0.5649	-1.2515	-0.9462	-0.2076	-1.0087	-0.4228	-0.6148	0.4179	-0.6104	0.8969	-1.486	-0.816	-1.5187	-0.5291	-0.1844	-0.4501	-0.8288	-0.881	-0.0439	0.1865	-1.3921	-1.1456	-1.6529	-0.0425	-0.3921	-1.0559	0.4308	-0.5395	-0.692	-0.8599	-0.3511	-0.3456	0.0772	-2.035	-0.9214	-1.462
OR2B2	-0.274	-0.3273	0.9305	0.6862	0.5907	1.4808	NA	0.0704	0.4158	NA	-0.0634	0.6933	0.9613	0.301	0.6915	1.7841	-0.173	1.1532	0.4668	0.2534	0.5859	0.6257	0.8456	NA	NA	0.3494	-1.2481	NA	NA	NA	0.5685	0.1164	NA	NA	0.3852	0.2351	0.3265	0.2678	NA	0.543	0.8032	1.1629	0.5548	0.1124	NA	NA	0.2066	NA	-0.3548
OR2H1	-0.0321	0.315	-0.1219	0.1712	0.33	0.2821	0.6754	0.7381	-0.4982	-0.5628	0.1243	0.2702	0.4255	0.5617	0.6192	1.125	-0.46	-0.6371	0.2714	0.4563	0.6388	0.2388	0.7172	0.1414	-0.8237	0.3103	-1.1943	0.2314	-0.3147	-0.0604	-0.2109	-0.3846	-0.1617	0.0115	0.4082	-0.2243	0.4926	0.4521	0.1164	0.3022	0.0398	0.1427	0.1401	0.3426	0.0496	0.1177	-0.771	0.6378	-0.1472
VARSL	-0.7298	-0.5291	-0.482	0.0257	-0.1681	-0.5187	-0.8211	-0.5606	-0.1959	-0.3094	-0.8034	-0.1746	-1.038	-0.2934	-0.9799	-0.852	-0.1125	0.0868	-0.2758	-0.1697	-0.5907	-0.1329	-0.2413	-0.737	0.4255	-0.6461	-0.6416	-0.8443	-0.1094	-0.1345	-0.5522	-0.8262	-0.6484	-0.9132	-0.7084	-0.454	-0.281	-0.484	-0.6873	-0.0755	-0.9159	-0.2193	-1.1203	-0.6873	-0.2379	-0.811	-0.3884	-0.706	-0.9406
HCP5	1.7247	1.1043	0.6351	1.5714	2.3926	2.362	0.2041	1.4222	2.1401	0.7066	1.2922	2.0303	-0.9241	0.3448	0.9568	0.6915	2.2268	1.1718	0.3796	0.8156	0.543	0.9358	-1.6082	-0.0649	1.8082	0.3311	1.1801	1.4362	2.2504	1.0861	0.0976	1.6267	0.9553	1.629	1.0697	0.9738	-0.2793	1.0144	0.9389	2.0222	1.7273	2.3371	0.8041	0.2129	1.6471	2.9644	0.2029	0.6406	0.7373
HSPA1A	0.1427	0.1928	0.8024	1.6794	-0.3165	-1.2142	0.1057	0.2277	0.0454	-0.2636	0.4668	0.4626	0.688	-0.016	-0.4189	-0.5023	0.184	0.1725	-1.3846	0.4552	-0.3076	-0.8314	1.0683	0.0186	0.3115	-0.9546	0.0286	-0.2159	0.7155	-0.0058	0.1506	0.4093	1.3351	-0.488	0.3161	-0.0619	-0.4481	-0.0425	-0.2775	-0.811	-1.077	-0.1047	-0.4961	-0.2987	-0.2328	-0.1504	-1.5064	-0.0365	-0.6282
BAT3	-0.7037	-0.8863	-0.16	-0.7013	-1.0262	-0.3511	-0.8034	-0.8468	-0.488	-1.3511	-1.0589	-0.2619	-1.1456	-0.8009	-0.9269	-1.2863	-0.3129	-0.4208	-1.2311	-1.3401	-0.9743	-0.9105	0.2129	-1.0831	-1.3076	-2.0529	-2.071	-1.4074	-0.7202	-0.9269	-2.2447	-1.6126	-1.035	-1.0087	-1.1552	-0.7394	-0.4344	-1.2009	-1.0262	-1.2934	-1.6439	-1.5951	-1.6215	-0.9024	-0.6689	-0.8916	-1.5437	-1.8314	-1.811
ZBTB12	-0.6967	NA	-0.1172	0.583	NA	1.2203	-1.3771	-1.3808	0.184	NA	NA	-0.527	NA	NA	NA	0.2642	NA	-0.1617	-0.2193	-0.2076	NA	0.2534	0.4563	NA	NA	-0.331	-0.4131	NA	NA	NA	NA	NA	0.0101	-0.6215	NA	-0.8059	0.2129	0.6871	-0.4501	NA	0.5049	0.3173	NA	NA	-0.3419	NA	NA	NA	NA
B3GALT4	1.8992	1.7891	1.7463	1.1434	2.3127	1.8464	1.2104	1.891	1.4222	1.5826	1.254	1.5739	1.2798	1.4699	1.6107	1.6681	1.5811	1.4787	1.146	1.4828	1.3718	1.7316	1.2957	1.6036	1.0759	1.1941	1.2916	1.5705	1.5519	2.0165	0.9833	1.8355	1.5271	0.7049	1.8282	1.7715	1.082	1.9298	0.9716	2.1313	1.0587	1.9815	1.5331	1.2863	1.4087	1.1641	0.9054	1.117	1.0419
ZBTB22	-0.0233	-0.0923	0.5079	-0.1714	0.1916	0.275	-0.1959	-0.1329	0.7799	-0.2109	-0.0469	0.107	-0.5312	-0.4228	-0.4325	-0.1313	-0.2706	-1.2584	-0.0664	-0.486	-0.0831	0.1928	0.4212	0.2497	-0.7859	-0.725	-1.5064	-0.3474	-0.4074	0.0468	-1.0262	-0.5842	0.2412	-0.0439	-0.5864	0.6942	-0.016	0.0029	-0.2076	-0.281	-0.4112	-0.7131	-0.484	0.5539	-0.1681	0.3482	-1.3622	-1.038	-1.0321
SPDEF	1.6727	2.7606	3.3702	2.6615	3.0991	2.6067	0.0607	1.8359	2.739	1.2648	0.1414	3.1339	2.4057	2.0976	0.9092	0.7216	1.224	2.4386	-0.071	1.3757	2.8524	2.2431	-0.013	0.6844	0.9343	2.7759	-0.038	1.0766	0.7467	1.543	-0.6643	2.4808	2.0147	2.6563	1.6309	2.2878	3.2085	0.263	1.3945	0.5519	0.9054	1.9767	1.0983	1.105	1.4967	1.7769	1.9993	1.903	1.26
FKBP5	1.3713	1.6636	1.2756	2.1094	0.3033	2.5818	1.0524	1.0915	0.069	-0.9024	0.3437	1.2098	2.2191	3.2692	3.0088	0.8992	0.5578	1.1985	0.2821	2.6976	2.0261	1.3668	1.7424	-1.2898	0.6211	0.8343	1.3202	0.5753	1.6929	1.0786	1.1622	1.5806	0.7596	2.9618	0.384	-0.2898	2.4872	3.6747	0.5578	2.8614	0.8789	0.4688	0.704	-0.0801	-0.1552	2.3254	1.0433	0.7621	0.3138
COQ3	-2.458	-2.7466	-1.5821	-3.354	-2.3292	-2.3511	-2.5995	-2.6897	-1.6439	-2.071	-2.4901	-1.3997	-2.3884	-2.9324	-2.5395	-2.5995	-1.6943	-0.8417	-1.9324	-2.9324	-2.7661	-2.3147	-2.0174	-2.041	-2.2515	-1.9546	-1.1649	-2.5064	-1.9771	-2.6259	-1.5735	-1.6897	-3.2793	-1.6943	-2.9771	-2.458	-2.5649	-2.6897	-2.9546	-2.5821	-2.0174	-2.889	-2.6259	-3.1584	-2.6349	-2.035	-1.6897	-2.5821	-2.3292
PHACTR2	0.5099	0.7883	1.3465	1.7502	0.7621	1.2714	1.0072	1.5375	1.117	1.5965	0.542	1.433	0.3994	0.2079	0.992	0.0454	1.8512	1.1077	-0.2498	0.9479	-0.1313	0.774	0.2141	1.2738	0.6717	0.6681	1.545	1.0496	1.2339	1.1998	0.0854	0.6182	0.2116	0.2497	0.8496	1.211	1.6567	1.2116	0.9971	1.4834	1.1833	1.0014	1.519	1.6341	1.0895	0.384	0.2998	1.5281	1.5216
NT5E	0.7664	-0.1094	-1.776	-1.1552	-1.2379	-1.4901	-1.7909	-0.7563	0.2998	-1.6529	-0.1203	0.3896	-0.889	-0.2176	-0.7037	-0.9856	-0.7859	-2.8468	-2.1714	-0.6439	-1.8417	-0.9379	0.7066	0.5099	-1.0087	0.0454	-1.889	-1.0649	-1.9051	-1.6171	1.6457	-1.8365	-1.2653	0.659	-2.3884	0.4016	-0.9686	0.648	-2.0233	-2.1329	-2.7563	-0.5585	-0.0469	-0.6712	0.0731	-2.3511	-2.1266	0.1635	-1.2515
SH3BGRL2	0	2.1434	0.7866	1.5558	3.0515	0.2786	1.8127	3.0409	1.7146	1.7862	1.3426	1.1017	1.7849	0.7647	0.0731	1.4	1.1782	1.4114	-0.2498	2.3857	-0.2447	0.0229	1.1654	2.117	1.251	-1.7909	1.7251	2.2531	0.848	2.2287	1.216	2.5857	0.5907	1.9631	0.9046	2.6754	0.9456	2.005	1.269	0.6313	1.1375	0.6942	1.568	0.8448	1.3414	0.8189	3.1436	1.2666	0.6378
TBC1D7	-1.1266	-1.2619	-0.1681	-0.897	0.0718	0.1557	-1.3076	-1.5228	-0.016	-1.5312	-1.4659	0.1414	-0.7515	-1.1943	-1.2481	-1.458	-0.4481	-0.1345	-1.1172	-1.1488	-1.2969	-1.0954	0.4967	-1.6484	-0.6237	-0.7859	-0.7418	-0.5084	-0.5606	-1.304	-0.4442	-1.3921	-1.2688	-1.1329	-1.6439	-0.9132	-0.6712	-1.5187	-1.3328	-1.5064	-0.6529	-0.1156	-1.2109	-1.3808	-1.1297	-0.6897	-1.1456	-0.4208	-0.706
TMEM14C	0.1414	0.275	0.9694	0.3173	1.201	0.856	0.2786	0.3414	0.0881	0.127	0.3482	0.3334	-0.1697	-0.0786	0.6154	-0.9546	0.0144	1.129	-0.0893	0.3718	0.2975	0.1953	0.0772	0.2412	-0.3622	0.7983	0.6526	0.6192	0.3219	-0.0218	0.4573	0.0186	0.8367	-0.2636	0.3885	0.0854	0.1865	0.2265	0.3482	-0.1894	0.3323	0.9694	0.473	0.2041	0.0745	0.0841	0.3584	0.5489	0.5489
RPP40	-2.1976	-2.2447	-0.6781	-1.6304	-1.1844	-1.1746	-1.8836	-2.3219	-1.7515	-2.0291	-1.8997	-1.4074	-2.0893	-1.816	-1.9602	-1.5821	-1.5146	-1.486	-1.1844	-2.1649	-2.0954	-1.776	-1.8573	-2.152	-1.1047	-1.3076	-1.2584	-1.9658	-1.4344	-2.1078	0.037	-2.3585	-2.4422	-1.038	-2.035	-2.1266	-1.5353	-1.255	-1.415	-2.041	-0.9971	-1.3147	-1.8625	-1.8573	-1.8573	-1.0499	-1.1329	-1.6574	-1.1552
RBM16	0.2522	-0.0604	0.6012	0.6906	1.0243	0.6978	0.8139	0.4404	0.2437	0.8999	0.5869	0.987	-0.3865	0.704	0.2987	0.0014	0.3254	1.2576	0.7476	0.6415	-0.4112	0.827	0.1635	0.9694	0.8205	0.9464	1.9042	0.7268	1.1935	-0.0014	1.0489	1.2863	0.3573	1.0559	0.3528	1.8028	0.0243	0.5568	0.6862	0.1763	0.7181	-0.0291	0.5008	0.9464	0.2987	-0.0529	1.4542	0.6041	0.4823
AKAP12	-1.3959	-2.5995	-1.6439	1.1744	-1.6394	-0.1172	-0.097	-1.4189	1.1846	-0.0233	-1.4501	2.3727	0.8687	0.9745	1.2425	-0.5929	-0.8288	-1.255	1.119	-0.6506	-4.553	0.3426	-2.3364	-1.6082	-0.1633	-1.2009	-1.4305	-3.2653	1.0868	-0.1016	-1.7909	1.0566	0.1057	0.3994	-0.5756	-1.5395	-0.2793	-0.2042	-2.0893	-0.0893	-1.4982	-0.749	-1.3659	-1.4461	-1.3219	-2.4189	-0.3219	-0.5002	-0.1408
ARG1	NA	NA	NA	NA	NA	NA	NA	NA	NA	0.2351	NA	NA	NA	NA	1.7924	NA	NA	NA	NA	NA	NA	2.1545	NA	NA	NA	NA	NA	NA	NA	NA	NA	0.0058	-0.0101	NA	2.1985	NA	NA	0.0243	NA	4.8384	NA	NA	NA	NA	NA	NA	NA	NA	NA
BCLAF1	0.8789	0.9245	0.9694	2.3239	0.9404	1.9579	1.8221	1.513	1.1329	0.541	1.5534	1.9572	1.1097	1.6572	1.4709	1.6332	1.2491	1.433	2.0949	1.8201	0.3254	1.1077	1.2497	0.513	1.4605	0.6088	1.3813	1.6234	1.629	1.1421	1.2892	0.8367	0.8205	1.6332	1.0969	1.3868	1.2756	1.9256	1.2135	0.9613	1.2815	1.0236	1.1204	1.0834	1.4647	0.3696	1.6112	0.8875	1.0594
HSF2	-2.5995	-3.1976	-2.152	-3.1078	-2.2653	-1.3997	-2.0589	-3.0831	-1.1617	-1.2688	-2.0233	-1.9214	-3.2109	-1.3884	-3	-4.6331	-1.3921	-2.2379	-2.0649	-2.7661	-4.5804	-3.4204	-2.8783	-1.2969	-0.7637	-2.1203	-1.2584	-2.5395	-1.4305	-2.1976	-0.5907	-1.5606	-3.3481	-2.4739	-4.5362	-1.1976	-1.6574	-2.0954	-3.589	-3.0469	-1.8009	-2.816	-1.8678	-2.1329	-2.8573	-2.0831	-2.4501	-2.0058	-3.5513
PPIL6	-0.881	-0.2176	0.3033	0.0328	1.9716	0.7485	2.5099	-0.6282	0.679	2.0129	0.544	0.8496	-0.0786	-0.7013	0.119	-1.5951	2.3545	1.4147	2.5806	0.8424	-2.482	0.2558	1.858	2.2247	2.2088	-0.7686	0.6239	1.7706	1.472	-0.417	-0.8135	2.7887	0.8416	1.125	2.7214	0.0342	0.8246	3.5521	1.9203	-3.0469	-0.3771	1.9283	1.1401	2.12	0.3663	-1.077	2.5543	3.7708	-0.1376
MRS2L	-0.3997	-0.7588	0.9884	-0.4055	0.7251	0.3973	-0.1943	-1.038	-0.7394	-0.2345	-0.6735	0.0704	-0.8836	-0.3622	-0.3004	-1.415	-0.5973	0.9343	0.2004	-0.1993	-0.9771	-0.3292	0.9884	-0.5995	-0.0695	0.384	0.7031	-0.2619	0.751	-0.9658	0.7757	0.0827	-0.3401	0.3973	-0.1665	0.3674	-0.2688	-0.0277	0.0144	-0.5023	-0.2126	-0.4364	-0.6148	-0.9132	-0.4093	-0.699	0.9084	-0.0831	0.0607
ATG5	-0.1894	-1.0862	-0.5756	-0.0454	-0.5291	0.4531	-0.3566	-0.2775	-0.8059	-0.1681	-0.6873	0.3994	-0.9518	-0.3715	-0.1187	-0.7612	-1.0589	0.5685	-0.484	-0.2881	-1.6943	0.0976	-0.6082	-0.4228	-0.4286	-0.0291	0.3984	-0.2311	0.0976	-1.3846	0.7207	-0.077	-1.3401	-0.8704	-0.7108	-0.484	-0.6758	-0.3959	-0.852	-0.4035	0.058	-0.4131	-0.1203	-0.8084	-0.2515	-0.8186	0	0.1493	-0.2193
SLC22A2	0.514	NA	NA	NA	NA	NA	NA	-0.9051	NA	NA	NA	0.0759	NA	0.6745	NA	1.2376	0.3741	NA	NA	NA	NA	NA	NA	NA	NA	0.4573	NA	NA	NA	NA	0.5685	NA	-0.0218	NA	NA	NA	NA	0.538	0.0243	0.7757	NA	NA	NA	NA	NA	NA	NA	NA	0.2302
RSPO3	-1.7131	-6.3452	-2.4659	-2.8573	-6.0685	-2.7084	-2.662	-5.7103	-2.7466	-1.1779	-4.5838	-2.5228	-2.7084	-1.041	-3.3614	-3.7141	-1.7084	-0.9714	-3.1456	-2.889	-5.6367	-1.6897	-6.0023	-3.6171	-3.3929	-1.852	0.0129	-6.1688	-1.3548	-3.1976	-0.9799	-5.7027	-5.1431	-5.9568	-0.9159	-3.1456	-4.4612	-4.7103	-3.3793	1.6159	0.2678	-3.0589	-3.2793	-3.7122	-2.6804	-4.3162	-0.6552	-4.3511	-2.0893
TSGA14	-0.9942	-1.1488	-0.274	-1.2481	-1.0174	-0.6304	-1.1617	-1.1681	-0.5458	-1.5522	-1.0029	-0.8186	-1.4779	-1.4305	-0.685	-1.0529	-0.9771	-1.2447	-1.1714	-0.9324	-0.9546	-0.6943	-0.9714	-1.6126	-0.3492	-1.4383	-1.4035	-1.5146	-1.2109	-0.7322	-0.5628	-1.6666	-1.304	-2.5649	-1.6897	-1.6349	0.0058	-0.6349	-2.0174	-1.5064	-1.5692	-0.7013	-1.7563	-0.7884	-1.221	-0.6897	-2.1392	-0.9574	-1.2345
CHM	-1.0029	-0.0908	-0.5522	0.7562	-0.7784	-0.486	-0.4112	-0.5821	0.8024	-1.2345	0.6443	-0.6038	-1.0923	-2.035	-0.9602	0.0115	-0.6643	-0.6259	-0.2311	0.069	-1.3437	-0.9546	-0.1488	-1.685	-0.5437	-0.8651	0.0101	0.9069	-1.0529	-0.2311	1.5988	-0.9799	-0.6827	-1.7418	-0.7784	-1.035	-0.7013	-0.6461	-0.8135	-0.8757	-1.0174	0.184	-0.5799	-1.221	-0.4921	-1.1047	0.3763	-0.5692	-0.9546
CENTG3	0.1322	0.4531	0.5291	0.8953	1.1486	-0.737	0.384	0.2963	-0.4093	0.9672	0.9986	0.2534	1.3741	0.6229	0.9538	0.9738	0.0158	0.3092	0.8758	0.7355	1.0915	0.7355	-0.0786	1.2732	1.0614	0.364	0.8383	0.584	0.8229	0.809	1.1884	1.6323	0.8592	1.2406	1.0461	0.8718	0.3685	0.8504	1.2284	-0.0954	0.1725	0.0482	0.6745	0.4319	0.8311	0.119	1.0663	0.8383	0.6425
FLJ13195	-1.6126	-1.3004	-0.3058	-1.3219	0.1124	-1.1047	-1.9159	-1.3585	-0.3419	-0.5886	-0.5084	-2.776	-1.3696	-2.4189	-1.527	-2.041	-0.7784	-1.4383	-0.6326	-2.2793	-0.4055	-1.2379	-0.2277	-2.0174	-0.2636	-1.3696	-0.2987	-1.4659	-0.3492	-1.3147	0.2666	-1.114	-0.7539	-1.4739	-1.7131	-1.1649	-0.7013	-0.3328	-1.0439	-1.776	-0.2969	-0.692	-1.9159	-1.3997	NA	-1.6394	-1.1047	-1.8262	-1.2009
ARS2	-1.1203	-1	-0.852	-0.484	-0.9159	-0.3733	-0.9132	-0.9214	-0.6104	-0.8034	-0.9434	-0.1488	-0.4679	-1.0203	-1.2142	-0.4247	-1.1424	-0.8135	-1.0087	-1.2042	-0.6967	-0.8288	-0.5713	-0.5886	-0.8468	-1.0529	-1.1844	-1.1203	-0.5479	-1.0087	-1.221	-0.7934	-1.1877	-0.4442	-0.9686	-0.55	-0.4521	-0.7859	-1.1016	-0.6574	-1.2042	-0.9132	-1.3884	-0.4131	-0.4699	-0.8237	-1.3771	-0.6967	-1.1779
MOSPD3	0.1865	0.1283	1.0186	-0.3165	-0.0454	-0.173	-0.567	-0.2671	-0.3237	-0.7108	0.5089	0.0718	0.1609	-0.281	-0.3237	-0.2142	-0.6735	-0.8009	-0.415	-1.3076	0.4147	-0.0574	0.5926	-0.4364	-0.2934	-0.2775	-1.4035	-0.0786	-0.488	-0.2464	-0.9024	-0.3511	0.2376	-0.3566	-1.1078	-0.0174	0.6645	-0.48	-0.2396	-0.9434	-0.5416	-0.5332	-0.4719	-0.0649	-0.2109	0.7681	-0.662	-0.415	-0.5374
WBSCR17	0.9199	-0.0649	1.2041	-0.7686	0.545	-1.2863	-0.417	0.4678	0.5211	0.4489	0.373	-1.7322	0.3437	0.0963	-0.5543	-0.9132	-0.6506	-1.7179	-0.4035	-1.1109	-0.3566	-0.5543	-1.3292	-0.5585	-0.5043	-1.9379	-2.2176	-0.7131	-1.0439	0.0786	-2.0233	-0.2688	0.1084	-0.114	-0.0908	1.4082	-0.8417	0.3357	0.0384	-1.6126	-0.6643	-1.7084	-0.5437	1.0996	1.1635	-1.5146	0.0566	-1.9658	-0.6082
BHLHB8	0.0663	0.3618	0.0496	-0.1313	0.3391	0.281	0.8472	0.827	-0.6148	-0.1156	0.1243	0.2654	0.4049	0.7664	0.5008	0.9877	-0.8443	-0.7274	0.3033	0.3033	0.893	0.7128	0.4906	0.1362	-0.5756	0.7013	-0.1187	0.3092	-0.1094	-0.2533	0.099	-0.5166	-0.3147	0.3584	0.4255	-0.1697	0.5539	0.3707	0.229	0.4478	0.1699	0.1557	0.2869	0.3984	0.0854	0.2762	-0.173	0.6154	-0.2109
GLI3	1.8282	-0.771	1.4303	0.3885	0.107	4.1252	1.0731	0.1375	0.1966	1.1057	0.9627	0.0841	3.103	1.2035	1.0517	0.8392	0.1712	-0.5799	2.1473	2.371	2.5211	1.342	-1.7612	-0.0816	1	3.6599	-0.2059	1.7053	0.8774	-0.1187	2.1047	-1.7226	1.7141	-0.3419	0.9819	0.2079	1.6429	1.025	1.0321	-0.6016	0.4709	1.263	0.4287	0.7407	1.5099	0.9679	2.2827	0.9819	1.9321
HOXA3	0.0186	-0.0484	-0.0365	0.0172	0.2963	0.1043	0.2216	0.127	-0.1568	-0.3237	-0.255	0.1941	0.2154	0.1712	0.2041	0.1057	-0.1536	-0.3978	-0.2142	0.0101	0.2179	0.1057	-0.0649	-0.0529	-1.0559	-0.0233	-0.7661	0.0718	-0.3865	-0.3273	-0.1993	-0.0877	-0.0679	-0.3383	-0.0145	-0.2243	0.2253	0.0286	-0.3129	-0.0203	-0.2498	0.1493	0.0115	0.0881	0.0854	0.0328	-0.5995	0.0566	-0.2584
CD36	0.1852	1.8891	1.4605	3.3533	1.8572	0.7966	1.3879	3.9155	1.8624	3.9561	2.2633	0.5039	1.5484	1.4351	5.1052	-1.2934	2.2753	1.3522	-0.1552	3.1838	-0.458	1.9767	-0.5146	1.4668	1.3363	1.3646	3.8836	4.2055	2.1213	3.851	1.0342	-0.013	1.9819	-0.2515	3.2339	2.5607	2.0229	1.9942	2.0416	0.9627	2.7281	2.0528	3.1055	1.6337	1.3685	1.4828	1.5787	1.6654	4.7871
PSCD3	-0.4055	-0.3004	1.5641	0.6107	0.6826	-0.3292	-0.6643	-0.8916	-0.1016	-1.4344	0.1878	1.4303	0.4936	-0.8625	-0.1172	0.1966	0.2091	-0.3076	-0.1062	1.0772	0.127	-0.144	-0.2159	-0.8417	-0.1746	1.7832	-0.0116	-0.0877	0.0594	-1.1943	1.2534	0.5792	-0.2515	0.4136	0.7899	-0.2498	1.2129	1.2857	-0.8494	-1.3219	-0.8365	0.5479	0.3595	0.2449	0.2987	-0.5312	1.6145	0.6942	-0.2498
NXPH1	-3.2379	-3.0469	-2.5907	-2.6897	-2.8262	-3.2934	-3.2379	-3.6953	-3.071	-3.6153	-3.1714	-1.7274	-1.9602	-3.4469	-3.2793	-3.6403	-2.6439	-3.5129	-3.3076	-3.4081	-1.9602	-2.2934	-3.0116	-2.4739	-3.5328	-2.816	-2.3292	-2.3884	-2.2723	-3.1456	-2.4422	-2.2447	-1.9942	-2.6529	-2.2042	-3.9862	0.2141	-3.3076	-1.776	-3.4612	-3.5462	-2.8783	-2.6171	-2.8678	-3.0469	-3.3379	-1.041	-1.737	-2.6897
GTF2IRD1	-0.4364	-1.4779	-0.5799	-0.6304	-0.9971	-0.692	-1.1877	-1.2793	-1.3659	-1.3585	-1.3364	-1.4305	-0.7108	-1.4305	-1.2447	-0.6193	-1.1109	-1.0145	-1.6171	-0.8391	-1.5864	-0.8084	-0.5649	-0.3677	-1.3511	-1.0058	-1.1714	-1.6712	-0.8314	-1.2481	-1.3004	-0.7346	-1.458	-0.7834	-1.771	-1.5692	-0.9799	-0.6082	-1.2042	-2.7661	-1.9546	-1.1779	-1.8262	-0.8262	-1.1329	-1.1877	-0.5312	-1.071	-1.2515
STYXL1	-0.4521	-0.9771	0.4813	-1.3696	-0.2109	-0.6484	-1.7226	-1.7466	-0.3511	-1.0893	-0.9856	-1.5437	0.1814	-1.5522	-1.2584	-2.8468	-0.3622	-0.737	-1.8997	-1.3959	-0.3474	-0.6827	-1.816	-0.6643	0.1979	-0.9024	-1.662	-1.3474	-0.9771	-0.9856	-1.0801	-0.9743	-0.527	-1.1424	-1.5064	-0.9743	-0.3752	-1.1172	-1.3183	-1.9885	-1.9159	-1.2688	-2.3219	-0.9406	-1.0233	-0.8599	-1.949	-1.0439	-1.3511
SHH	-0.3058	-0.191	-0.2076	-0.2916	-0.2159	0.1991	-0.1472	1.2271	-0.5437	-0.567	0.4447	0.3265	-0.8599	0.3254	-0.1376	0.7476	-1.1779	-0.6215	-0.2636	-0.1203	0.4761	-0.0604	0.7799	0.1712	-1.2863	1.5251	-1.1016	1.103	-1.1844	-0.274	0.044	-0.1617	-0.1266	0.696	-0.0454	-0.1329	-0.074	-0.0801	-0.4189	-0.0365	-0.0649	0.115	0.148	-0.4093	1.0186	-0.5064	-0.0574	0.0745	-0.7515
ABCB5	NA	NA	NA	NA	NA	NA	NA	NA	NA	NA	NA	NA	NA	NA	NA	NA	NA	NA	NA	NA	NA	NA	NA	NA	NA	NA	NA	NA	NA	NA	NA	NA	NA	NA	NA	NA	NA	NA	NA	NA	NA	NA	NA	NA	NA	NA	NA	NA	NA
TES	0.7933	0.774	1.1991	0.8726	0.6799	0.6145	0.0922	0.1878	0.3752	0.1043	0.5301	-0.1536	-0.6104	0.1583	0.2351	-0.2109	0.6229	-0.5291	-0.776	-0.5125	0.8254	0.8472	0.107	-0.0816	0.7424	0.4222	-0.1665	0.315	-0.221	0.9054	0.6978	-0.0786	-0.0847	-0.4189	0.2351	-0.173	0.2702	0.3807	0.2618	-0.274	0.1878	0.8655	0.8781	0.3707	0.0129	-0.5084	0.5049	0.3045	1.0766
MAFK	-0.776	0.051	-0.4383	-1.1681	-0.6148	0.2654	-0.4035	0.1763	-0.5649	-0.7959	-0.1376	0.7807	0.6041	1.3477	0.2363	0.9833	-0.9051	-0.8836	-0.6574	-0.071	-0.0014	0.037	0.8528	-0.0831	-1.2345	0.263	-0.2758	-0.3437	-1.3437	-0.6304	-0.0101	-0.394	-0.3383	-0.2793	-0.394	-0.0072	-0.0087	0.0649	-0.1617	1.308	-0.3328	-0.3827	-0.1861	-0.4266	0.434	-0.1763	1.7841	0.229	-0.6597
ST7L	-0.3715	-0.5105	-0.4481	-0.3921	-0.3346	0.659	-0.454	-0.8573	-0.8391	-0.9078	0.2881	-0.125	-0.3771	-1.0174	-0.4074	-0.8135	-0.1697	-0.3566	-1.071	0.1084	0.0454	-0.9518	-0.152	-1.2515	-0.3201	-0.725	-0.7515	0.111	-0.1078	-0.077	-0.4247	0.1296	-0.4461	0.0745	-0.486	-0.55	-0.7274	-0.5002	-0.2584	0.4093	-0.1297	-0.9105	-0.4521	-0.0336	-0.0189	0.3629	-0.2567	-0.1552	-0.4679
GNG11	-0.4093	-1.1649	-0.2076	-0.0277	-0.527	-0.4779	-0.304	0.4782	-0.5606	1.3086	-0.0277	-1.0985	-0.816	-0.0454	0.6844	-1.2447	-0.0831	-1.458	3.3047	0.7172	-1.462	1.2998	1.263	-0.016	-0.7418	1.7035	0.7681	-0.816	0.8828	-0.097	1.3774	-1.4383	0.2738	0.9664	0.2821	-0.1376	0.3539	-0.2379	-1.4383	-0.1779	-1.0145	-0.0336	-0.606	0.4233	-0.7155	-1.0589	2.0851	0.4885	0.4265
MTERF	-0.7859	-1.3921	-0.191	-0.7661	-0.3328	-0.5353	-0.7037	-1.0469	-1.1361	-0.8288	-0.6282	-1.3219	-0.3022	-1.1714	-0.8339	-1.114	-1.0923	-0.8943	-0.173	-1.2481	-1.2584	-0.8599	-0.9602	-0.8783	-0.3865	0.3994	-0.5146	-0.897	-0.3094	-1.0087	-0.4679	-1.811	-0.749	-0.2653	-1.4941	-0.6712	-0.3622	-0.3511	-1.0801	-0.2934	-0.7131	-0.2636	-0.771	-0.7274	-1.1329	-0.3437	-1.8836	-0.304	-0.0145
RPIB9	-1.7612	-3.6403	-1.889	-1.255	-1.3364	-0.5842	-1.8468	-0.6461	-1.0923	0.157	0.6889	-2.6897	-2.1203	-3.5838	-3.0589	-3.9456	0.4803	0.606	0.384	-3.5547	-1.7274	-1.4305	-0.9971	-1.0116	-1.9546	-0.9379	-1.9159	-3.1714	0.4615	-3.4739	-0.4719	-2.5735	-1.8573	1.0929	-0.394	-0.4305	-0.5208	-0.9187	-0.5606	-3.5295	-2.0831	-2.9105	-0.0985	-0.2515	-1.5907	-0.7934	0.1017	-2.0589	-2.2793
RAMP3	3.85	4.3161	2.9984	3.1327	2.8137	2.9624	4.2456	4.3716	4.6346	4.0197	5.1375	4.126	4.0781	3.5632	3.8659	2.5188	3.6531	3.6427	3.2835	3.9184	3.177	2.9581	0.9949	3.7527	3.5826	3.2376	3.4699	2.9343	4.1035	3.645	1.91	1.7698	3.9662	2.9157	4.1898	4.406	4.257	3.6531	3.8963	4.1522	3.9477	3.5185	4.3519	3.7015	4.8875	4.1069	1.9712	0.1941	2.8005
DKFZp761I2123	0.7476	0.3357	0.5955	1.745	-0.221	1.829	0.6754	0.5558	0.7268	0.3068	1.251	1.6045	2.2948	0.8821	1.08	1.0663	1.1538	0.7242	0.6069	0.9237	0.8528	0.8139	1.2928	0.2618	1.3454	0.257	-0.0321	0.4531	0.8999	0.6239	0.0552	0.4967	0.2327	0.6987	0.4038	0.3896	1.1243	1.4195	0.4688	0.5548	0.2437	0.6498	-0.2059	0.1454	1.0766	0.774	0.4813	0.3852	0.03
MRPL32	0.6257	0.0101	0.518	0.9077	0.9891	1.5216	0.679	0.2642	0.9328	0.4489	0.2091	1.1833	1.5509	0.4668	0.5281	0.3323	0.7233	0.2987	1.0433	0.6672	0.3539	0.6672	0.6599	0.3595	0.8392	1.2969	1.1401	0.4093	0.52	0.051	1.3448	0.5811	0.2277	0.4489	0.5231	0.4792	0.7858	1.433	0.3663	0.3696	0.6239	1.9336	0.9077	0.364	1.0433	0.5878	1.9003	0.6239	0.9964
DKFZp434F142	-0.3004	0.4372	0.0827	1.511	0.0412	0.3033	0.2714	0.1519	0.2351	-0.3111	0.1789	2.0482	1.315	0.5898	0.0922	0.9583	-0.1926	0.3785	0.7816	0.3618	0.189	0.2762	1.2528	0.3231	0.3663	-0.7834	-1.035	-0.4208	0.3022	-0.0218	-0.8059	0.1648	0.2216	1.3431	-0.035	0.4844	0.8139	0.7277	-0.486	0.8496	-0.4305	-0.077	-0.9324	-0.0043	0.875	0.2845	-0.3111	-0.1172	-0.2498
PARP12	1.4255	0.4179	1.2116	1.8392	0.7338	0.8359	0.3482	1.275	0.856	0.3219	0.2975	0.6285	0.9275	0.7329	1.1916	1.8813	0.9426	2.0996	0.4265	0.9613	0.7849	0.0229	0.144	0.175	1.1979	0.5099	0.8131	0.1349	1.8024	1.7924	1.251	0.0538	0.3973	0.6164	0.5646	0.308	2.0197	0.9986	0.1878	1.0969	0.0881	1.177	0.2594	0.9441	0.4265	0.3231	-0.7155	1.0847	0.9404
ING3	0.3528	0.4709	0.5859	0.6498	1.2798	0.6341	0.8472	0.8758	-0.3771	0.6672	1.1355	0.0172	0.3311	0.3718	0.6754	0.2534	-0.48	0.6987	0.7355	0.545	0.9797	0.373	0.103	0.7706	0.0922	0.4158	0.7545	1.044	0.9694	-0.0043	0.5859	0.1712	0.5568	0.9207	0.8294	0.5291	0.2054	0.8828	0.8742	-0.0893	0.7485	0.5859	0.9092	0.2412	0.5917	-0.2226	0.0468	0.7681	0.9986
SPAM1	NA	NA	NA	NA	NA	NA	NA	NA	NA	NA	NA	NA	NA	NA	NA	NA	NA	NA	NA	NA	-0.6349	NA	NA	NA	NA	NA	NA	NA	NA	NA	NA	NA	-0.0145	NA	NA	NA	NA	NA	NA	NA	NA	NA	NA	NA	NA	NA	NA	NA	NA
DLD	-1.1266	-1.4739	-0.1536	-0.7226	-0.1109	-1.3255	-1.5649	-1.3808	-1.8211	-0.6371	-0.9856	-1.737	-1.6712	-1.5064	-0.8135	-1.6394	-1.9214	-0.2636	-0.8417	-1.3474	-1.152	-0.8997	-1.6439	-1.0029	-0.749	-0.811	-0.2176	-0.6827	-0.2567	-1.5735	0.7084	-0.7909	-0.8943	-1.1172	-0.9856	-0.7859	-1.1078	-1.0862	-0.9324	-1.2142	-0.9518	-0.6781	-0.5332	-1.415	-1.1681	-1.415	-0.5291	-0.6552	-0.2987
ZNHIT1	0.8679	0.6285	1.2485	1.1616	1.2265	0.513	0.8432	0.9434	0.3196	0.4114	1.0093	0.1596	1.24	0.8375	1.0888	1.5366	0.2166	0.6369	0.9782	0.7613	0.6924	0.537	0.636	0.2277	0.5578	0.8123	0.4792	0.9486	0.6862	0.6924	1.251	0.4394	0.3685	0.5341	0.9275	0.5529	1.184	2.0377	0.4222	0.7146	0.5311	0.7991	0.844	0.6889	0.8148	1.2792	0.7807	0.9993	1.0272
FLJ10324	-2.6529	-3.716	-1.1392	-0.6237	0.7355	-0.706	-2.2863	-2.0058	0.0566	-0.7346	-2.889	-4.5162	-0.9187	-2.3437	-1.6259	-3.1976	-2.0291	-3.2109	-1.3437	-3.0831	-3.2653	-2.3733	-2.737	-1.0116	-2.5146	-1.6666	-1.7612	-2.2176	-1.1976	-1.6484	-3.61	-3.402	-2.3364	-2.0529	-1.1779	-0.949	-2.0174	-1.1016	-2.3884	-2.7274	-2.776	-2.7563	-2.7179	-1.0174	0.069	-4.0422	-1.8783	-4.0209	-2.2042
ZNF38	-1.2109	-1.0145	0.2351	-0.7155	-0.5023	-1.035	-1.771	-1.7037	-0.484	-1.4501	-1.3292	-0.8678	-0.3659	-1.3622	-1.5023	-1.3997	-1.0893	-1.3997	-1.6529	-1.9942	-0.7834	-0.9051	-1.1877	-1.2142	-1.191	-1.2379	-2.5146	-1.8573	-0.9686	-0.6394	-1.2863	-1.9434	-0.4961	-0.9434	-2.0469	-0.0072	-0.3165	-1.2379	-1.5649	-1.3548	-2.4035	-1.5649	-2.2379	-0.4383	-1.1109	0.0827	-2.8573	-2.2584	-1.4779
CTHRC1	3.9745	1.2762	4.1069	2.9345	0.373	2.9978	0.6781	-0.1001	3.0915	1.7545	0.6323	4.5129	2.7071	2.8428	2.5291	2.0339	3.7203	1.6036	2.5583	3.5148	-0.1094	3.9317	1.4552	-0.0893	2.9212	4.5173	1.7519	-0.364	2.5067	1.9324	3.6041	0.6853	0.583	-1.5606	-0.2602	0.8631	3.9241	-0.415	0.3907	2.0545	0.8221	2.5132	2.7183	2.1104	1.5529	-0.0233	2.2913	3.3799	3.4303
PURG	-2.0291	-1.3437	-0.8651	-0.8034	-1.816	-2.6349	-1.2076	-0.9351	-1.9658	-1.5692	-1.7859	-2.2653	-1.3401	-1.2311	-1.4112	-2.8262	-0.4719	-3.1584	-2.3884	-0.3808	-0.8084	NA	-2.191	-1.6943	-2.6349	-0.9602	-0.6371	-1.9159	-1.0831	-2.3659	-1.5228	-0.3147	-1.0499	-1.3548	-0.3827	-2.0954	-1.8943	-1.0145	-1.3292	-1.4422	-2.191	-1.1016	-1.0679	-1.2969	-0.9602	-2.9771	-0.9546	-1.415	-1.8678
UBE2E3	-0.0116	-0.8599	-0.0395	-1.1234	-1.2109	-0.2706	-0.749	-0.6148	-1.2481	-0.5929	-0.9799	0.669	-1.2723	-1.0058	-1.0589	-1.2142	-1.1649	-0.8186	-1.685	-0.0985	-0.0514	-0.3094	-0.173	-0.963	-1.2969	-0.2688	-0.816	-1.2723	-0.4982	-1.2345	-1.1617	-0.6689	-0.8573	-1.6215	-1.0029	-1.1392	-0.5842	-0.8625	-1.304	-1.5778	-0.7884	0.1017	-0.7179	-1.1109	-0.3022	-0.4055	-1.1016	-0.5416	0.0895
OTUD6B	-0.281	-0.7013	0.1137	0.2497	0.704	0.852	0.0841	0.5241	-0.4422	-1.035	0.0963	-0.5821	0.2642	0.6267	0.3242	1.1467	-0.6237	0.2618	0.3763	0.779	0.6397	0.0215	1.543	0.0482	0.5627	-0.0816	0.0115	-0.0679	0.7807	-0.0514	1.5573	0.52	0.1349	0.0172	-0.5907	0.0759	-0.7859	1.9906	0.3718	-0.4481	-0.3058	-0.4035	-1.7563	-0.9406	-0.5864	0.6267	1.0086	0.0314	0.2473
CDH17	-3.4628	-3.2243	-3.0469	-3.1714	-3.6206	-3.7236	-3.8954	-3.9954	-4.0493	-4.4771	-3.4328	-3.889	-1.8009	-4.1766	-4.0023	4.1554	-2.9546	-3.9412	-4.1871	-3.7622	-2.8262	-2.9771	-3.7046	-3.508	-3.9862	-2.9546	-3.5855	-3.5769	-3.1844	-3.7486	-0.1568	-2.9546	-2.1779	-2.7563	-2.6897	-4.737	-3.2793	-4.0589	-2.9885	1.515	-2.5312	-2.5907	-3.1844	-3.4659	-3.4517	-3.7544	-2.889	-2.5064	-3.5666
RBM13	-1.4422	-1.5395	-1.5995	-1.9159	-1.5312	-0.8704	-1.8365	-1.699	-1.0954	-1.486	-2.191	-1.6666	-1.6171	-1.9434	-1.7131	-1.7466	-1.1203	-1.3696	-1.5821	-1.7909	-1.4982	-1.2619	-1.9602	-1.4779	-0.5628	-0.3094	-1.0801	-1.1811	-1.3219	-1.6574	-1.3733	-1.3921	-2.1844	-1.4383	-2.0649	-1.0058	-1.776	-1.9885	-1.2793	-1.1234	-0.9914	-0.9743	-1.5353	-1.6897	-1.482	-1.4901	-0.1894	-1.2934	-1.4305
KCNK9	0.3127	-0.1763	0.4114	-0.1047	-0.0087	-0.0087	0.8164	0.3516	0.0243	-0.5437	0.584	0.6088	0.251	0.1661	-0.5084	0.5039	-0.5353	0.1928	-0.5249	-0.226	0.0314	0.8999	1.1447	0.1827	-0.8262	0.5529	0.9107	0.0868	-0.6439	-0.4305	-0.1424	-0.3364	0.4489	1.6126	0.189	-0.1062	0.3863	0.099	0.2975	0.1674	0.3763	0.2951	-0.1047	-0.5125	-0.692	0.4168	-0.0893	-0.0589	-0.7418
LYNX1	1.8371	1.0697	1.8229	0.886	0.0909	-0.2723	0.6088	0.6145	1.7194	1.0122	0.538	3.5008	3.2284	0.229	1.4911	0.7604	1.3668	1.0468	0.7832	0.9701	0.474	0.4362	-0.1665	0.8319	1.4399	-0.55	-0.7515	0.0868	0.148	0.545	1.5256	2.5276	0.4531	0.5675	1.0108	0.3471	0.6415	1.4988	0.4255	-0.3566	0.0759	1.4362	0.157	0.5558	1.7124	2.2579	3.7398	0.9069	1.1538
LOXL2	-0.0277	-3.1714	-0.4759	-1.3585	-3.1714	0.308	-3.2793	-2.9105	-1.5735	-2.3364	-3.1078	0.2351	-1.4501	-1.1681	-1.9885	-0.9105	-1.6529	-2	-2.1649	-1.415	-1.7322	-0.606	-1.2898	-3.4723	-1.889	-0.46	-2.6712	-2.8262	-2.191	-2.5479	-0.9686	-1.3437	-3.5479	-3.6349	-3.1203	-2.8573	-0.3058	-3.5786	-2.889	-0.2515	-2.5479	-0.4344	-2.1976	-2.8468	-2.5649	-2.9214	-2.2863	-0.9686	-0.5208
LRRC6	0.4212	1.157	0.0101	2.4613	3.7257	1.0433	1.0697	1.5792	1.7596	1.7031	0.7933	3.6182	2.2895	0.9833	0.605	1.6862	1.4657	0.6933	2.6194	1.1674	0.2963	1.2738	-1.4383	2.5117	1.8383	0.6736	-1.0589	1.1871	1.8671	1.359	1.4709	2.6494	0.8584	1.9241	1.6853	0.3448	1.3161	3.0952	4.0951	-1.0529	0.544	2.07	0.2253	2.0465	-0.0233	2.1808	3.557	2.9467	1.2054
GPR34	5.5173	4.9269	4.1707	3.9184	2.5585	3.3182	4.9174	3.8699	4.0815	5.6716	5.4138	2.5614	4.6135	3.8963	6.9331	1.9422	3.7485	4.5692	4.7004	5.2024	4.5002	4.2032	0.6978	3.6633	4.4489	4.0841	4.6011	5.1202	4.0365	3.8748	4.4396	3.2043	4.2001	1.4652	4.7692	3.7908	4.7021	2.9281	4.0892	4.0188	5.5726	3.7452	6.4656	4.645	3.8288	4.7803	2.6772	6.3407	6.08
DLC1	1.2582	0.5675	1.2582	1.0257	0.7093	1.5821	0.8294	1.5361	1.8627	1.7194	1.117	0.1519	1.846	1.1395	0.33	0.3482	0.7373	-0.3004	1.2528	1.3004	0.0186	1.934	0.5059	0.0496	1.6503	1.8544	NA	0.0314	0.8608	1.6745	0.1362	0.1283	-0.013	NA	0.0524	0.7084	1.9657	1.1947	0.0468	0.0607	0.923	0.384	1.1991	0.6332	0.6145	1.2259	1.1223	0.8303	1.3533
INDO	4.9117	4.5747	1.5821	4.6565	3.9819	3.8777	0.9986	1.8094	4.4535	2.2363	2.3882	4.9773	5.2906	2.849	2.9243	5.8629	2.127	5.1123	-0.5799	2.7485	2.1027	2.2403	0.0129	0.9069	1.7786	3.2972	4.3827	1.8647	4.4502	0.9328	3.4155	2.124	0.4803	2.6745	2.6706	1.3994	1.5074	3.3771	2.1037	5.4748	2.5308	5.6668	1.544	3.3813	2.0548	4.7495	-0.816	4.4764	2.1233
TMEM76	1.1519	0.8115	1.0158	0.4875	1.9111	1.2054	0.5695	1.3657	0.257	1.2172	0.962	0.8536	0.9283	0.8813	0.8065	1.0079	1.2491	0.315	0.539	1.2576	1.1401	1.8655	-0.8704	1.6215	0.0468	2.1167	0.8544	1.516	1.0072	0.512	0.127	0.545	0.7958	0.7364	0.4351	2.126	0.4212	0.8969	0.3829	2.145	1.037	1.044	0.8148	0.91	1.2247	0.3951	1.4351	1.1084	0.8294
MFHAS1	-0.255	-0.8288	-1.3808	-1.3076	0.0058	-0.5291	-1.3659	-1.1584	-0.4982	-0.8391	-1.1234	-0.6897	-1.2413	-1.0893	-0.6394	-1.0801	-0.458	-0.2311	-1.1877	-1.6038	-0.4759	-0.6237	-0.7984	-1.0321	-1.3696	-0.0695	-0.3004	0.5724	-0.749	-0.8625	-0.9214	-1.4739	-0.5437	-1.6529	0.434	-0.6897	-1.2243	-0.737	0.539	-1.5995	0.6257	0.0272	0.3584	-0.5735	0.6012	-2.2243	1.196	-0.2653	-0.2277
DEFA5	NA	NA	NA	NA	NA	0.1467	NA	NA	NA	NA	NA	NA	NA	NA	NA	0.281	NA	NA	NA	NA	NA	NA	NA	NA	NA	NA	NA	NA	-1.8625	NA	NA	-0.1779	0.0014	NA	NA	NA	NA	NA	-0.016	NA	NA	NA	NA	NA	NA	-1.482	NA	NA	-0.2653
SNTG1	NA	NA	NA	-2.2243	NA	NA	NA	NA	NA	NA	NA	NA	NA	NA	NA	NA	NA	NA	NA	NA	NA	NA	NA	NA	NA	NA	NA	NA	NA	NA	NA	NA	-0.0014	NA	NA	NA	NA	NA	NA	NA	NA	NA	NA	NA	NA	NA	NA	NA	NA
GSDMDC1	1	0.9862	1.0279	1.0983	0.9176	0.8608	-0.0923	0.6608	1.2104	1.0545	0.2253	1.8824	1.5573	0.519	0.6285	1.7133	1.4457	1.4688	1.5385	-0.0233	1.4921	1.3254	0.2265	1.654	1.3016	0.4761	-0.2464	0.745	1.1434	1.6116	-0.1649	1.3156	1.4854	1.3057	1.6672	0.679	1.4367	0.86	2.2525	1.6116	0.474	0.4957	-0.041	1.3528	0.9115	1.929	0.1427	-0.16	0.2253
KIAA0196	-0.3997	-0.9159	0.1852	-0.9187	0.0621	-1.0559	-1.5146	-0.9078	-0.6804	-0.9214	-0.7515	-0.6259	-0.9241	-1.1234	-0.4779	-0.949	-0.5208	-0.8599	0.0229	-0.9078	-1.1329	-0.8836	-1.2758	-0.2059	-0.8034	-0.2447	-0.7322	-0.5312	-0.6371	-1.0029	-0.415	-0.9799	-0.4286	-1.0862	-0.6215	-0.963	-0.8211	-0.7909	0.9275	-1.2009	-0.9269	-0.7155	-0.48	-0.699	-0.7834	-0.0604	0.2327	-0.6237	-0.4461
TRAM1	1.5221	1.2594	1.9527	1.1731	2.1699	0.1454	0.9046	0.9508	0.8172	1.9848	1.0208	0.1979	1.1486	0.8844	1.3874	1.2738	1.9609	0.6672	0.7233	1.06	0.7407	1.0949	0.4049	2.1887	1.6196	2.8307	1.5993	1.5763	1.6164	0.6443	1.519	1.7106	1.3829	1.3674	2.1966	1.0807	1.0915	1.2624	1.7044	1.0711	1.5661	1.3431	2.4016	1.8714	1.2166	1.7097	3.6982	1.3978	1.7273
NKRF	-0.9434	0.0043	-0.5564	-0.486	-0.1361	0.5539	-0.5437	-0.9686	-1.0831	-0.5043	-0.2294	-0.5929	-0.8863	-0.6215	-0.5821	0.0772	-1.074	-0.1976	-0.1376	-0.071	-1.2619	-0.9051	0.3482	0.315	-0.1125	0.175	0.1609	0.2191	-0.144	-0.852	0.4615	-0.1617	-0.6304	-0.417	0.0314	-0.4961	-0.776	0.0813	-0.1993	-0.5084	-0.304	0.8237	-0.7686	-0.8599	-1.0291	-0.7515	0.0014	-0.5395	-0.3511
EIF2C2	-0.9296	-1.7466	-0.3846	-1.458	-0.9714	-1.035	-2	-1.6712	-1.4305	-1.7612	-1.9885	-0.5799	-1.415	-1.2109	-1.873	-1.2345	-1.8314	-0.873	-1.0619	-1.6349	-1.3511	-1.3401	0.0314	-0.9296	-1.4982	-1.6758	-1.0469	-1.873	-1.6529	-1.7037	-1.7418	-1.527	-2.1976	-1.7322	-1.486	-1.3659	-1.7959	-0.8084	-0.0908	-1.8262	-1.6439	-1.662	-2.0893	-1.8314	-1.5228	-1.0499	-0.3978	-1.8783	-1.8783
DGAT1	0.044	-0.3022	0.9716	0.4222	1.2863	-0.5522	-0.1779	0.6853	0.0412	-0.5374	0.251	0.2654	0.3311	0.1137	0.0813	1.5893	0.1017	0.2892	-0.0619	-0.1633	0.0158	0.2179	1.0936	1.326	0.2253	0.2654	-0.8391	-0.2934	-0.5886	0.4136	-0.897	0.1966	0.6906	0.2129	0.7233	0.7442	-0.0514	0.6351	2.4441	-0.4247	0.0718	0.3674	0.5955	0.5926	0.4158	0.7579	1.1916	0.0676	-0.1746
SLC24A2	NA	NA	0.0412	NA	NA	NA	NA	NA	NA	NA	NA	NA	NA	NA	NA	0.4027	NA	NA	NA	NA	NA	NA	0.0922	NA	NA	0.229	NA	NA	NA	NA	NA	0.0172	-0.0203	NA	-0.0262	NA	0.0384	NA	NA	NA	NA	NA	NA	NA	NA	NA	0.0072	NA	0.0786
FIBCD1	-0.2413	-0.5886	-1.1016	-0.7984	-0.7298	-0.1001	-0.4383	0.0014	-1.2042	-1.2723	-0.3255	0.1583	-0.567	-0.3419	-0.1392	1.5753	-1.0499	-1.0893	-0.692	-0.8573	-0.3022	-0.5543	0.3674	-1.0831	-2.071	-0.9269	-1.9379	-1.3076	-1.3076	-0.7539	-0.8863	0.2546	-1.3328	-0.771	-0.5929	-1.2481	-0.4739	-0.1016	-0.811	-0.7661	-0.749	-0.7466	-0.7442	-0.9828	-0.8262	-0.6148	-0.9379	-0.9105	-0.9885
JMJD2C	0.2916	0.886	0.2485	0.472	0.7706	0.5321	1.1827	0.9833	0.5509	1.0272	0.6817	0.9107	-0.0014	0.373	0.3482	0.5955	0.2497	1.2129	0.6369	-0.0072	0.903	0.7467	-0.0816	0.9884	1.0043	0.3584	1.4185	0.5666	1.4558	1.1827	0.929	1.4136	0.4415	1.3646	0.1217	1.1434	0.6681	-0.3696	0.5028	0.2654	0.5509	0.4362	0.069	0.3346	-1.1392	-0.364	0.6126	0.9605	0.4425
INSL4	-4.227	-5.4112	-4.9658	-4.9839	-5.6012	-5.4485	-5.5395	-2.0649	-3.1456	-5.299	-5.1897	-4.2793	-6.1078	-0.7784	-5.812	-5.4485	-4.8365	-5.673	-5.7486	-5.3868	-2.9658	0.0881	-4.9885	-4.8741	-6.2002	-4.673	-4.9568	-5.1028	-5.2379	-5.5328	-2.5064	-4.5295	-3.7122	-4.9931	-4.2905	-6.2109	-5.3277	-5.7486	-4.1053	5.6002	-5.7103	-3.2379	-4.7799	-5.0589	-5.1178	-5.5666	-4.5262	-3.9062	-5.1228
TMEM32	-0.5543	0.1309	0.0827	-0.7859	0.0314	0.7757	-0.2379	-0.4422	-0.5332	0.0186	2.1084	-0.3789	-0.6552	-0.6484	-0.2379	-1.4901	-0.3165	-0.7298	-0.8034	-0.4461	0.2141	-0.6394	-0.3346	-0.5312	-0.2706	0.1467	-0.1424	0.2666	-0.8443	-0.3997	0.3022	-0.454	-0.5606	-1.5064	-0.2362	-0.6943	-0.699	-0.0043	-0.454	-1.2311	-0.1568	0.6369	0.0922	-0.3474	-0.2845	-0.527	-0.9379	-0.0831	0.0257
DNAJB5	0.0649	-0.4403	-0.2294	-0.2294	1.4515	-0.0649	-0.706	-1.0801	-0.6326	0.0229	-0.0469	0.1349	-0.417	-0.1125	0.0649	-0.255	-0.9743	-0.9105	0.5772	0.3929	-0.8009	0.9731	-0.1504	-0.5105	-0.9269	0.0314	-1.3511	-0.3183	-0.4228	-1.5522	-0.255	-0.2447	-0.482	-0.2619	0.1322	-0.1779	0.5079	-0.6416	-1.2109	-0.9024	-0.9942	-0.2793	-0.48	-0.0514	0.3752	-0.685	0.583	0.2228	0.2437
LOC552891	0.9199	0.0454	-0.0233	-0.304	1.3057	-0.3715	0.2606	-0.4383	-0.6506	0.8303	-0.097	-0.3255	-0.0174	0.0129	1.2203	-0.685	0.2833	0.037	0.1375	0.1738	-0.0847	0.7407	1.0363	0.6699	-0.5249	1.2504	1.3092	1.4093	0.1243	-0.6193	0.9782	1.5246	0.1467	-0.6148	0.0607	0.0086	-0.2481	-0.1763	-0.1047	0.2412	-0.0233	0.2522	0.3196	-0.4659	-0.4521	0.2253	1.1551	1.0286	1.1699
GABBR2	0.5627	-1.7661	0.119	-3.6295	-3.5031	-3.3808	-4.2163	-4.7524	-3.3076	-4.0469	-3.5786	-3.6385	-2.8468	-3.3437	-1.9771	-2.7661	-3.422	-4.0256	-3.57	-2.6897	-1.9714	-2.7859	-0.2042	-0.6781	-3.2379	-4.3133	0.0496	0.1979	-3.7009	-4.0186	-3.3585	-1.0203	-0.1536	-3.4628	-2.1392	-3.3793	0.4584	-1.811	-4.2136	-2.5312	-2.889	-4.8448	-4.2653	-1.685	-3.9771	-1.3921	-3.2515	-3.7859	-3.8283
TMOD1	-1.2413	-1.8997	-2.8262	-0.9296	-2.4189	-0.3959	-1.2481	-1.7322	1.3663	-0.8625	-1.2076	-0.1584	-0.3328	-1.9051	-1.6574	-3	-1.2898	-1.3111	-2.7563	-2.4189	-2.5146	-2.8678	-3.7027	-1.8365	-1.1392	-3.6047	-2.5821	-1.1361	-1.9105	-0.9971	-1.5951	1.2029	-1.4422	-0.8468	-0.706	-0.7442	-1.2515	-1.8783	-1.6038	-2.4035	-2.1584	-1.685	-0.8599	-2.0058	-0.6804	-2.8365	-2.1976	-2.4035	-2
DBH	-3.5395	-2.9324	-4.4485	-4.3778	-3.6602	-3.3076	-3.816	-2.1016	-3.6915	-3.4771	-3.2653	-5.2765	-4.6584	-2.889	-3.1203	-2.6804	-4.6153	-5.2324	-5.5328	-5.195	-3.6804	-3.2934	-3.7274	-3.3248	-4.4836	-4.6047	-3.1976	-3.9658	-3.2793	-2.7466	-4.6259	-4.4143	-1.949	-3.5113	-2.6712	-3.5873	-2.8262	-3.3219	-2.6349	-3.7027	-3.6841	-3.7819	-2.6712	-5.0023	-4.4707	-3.1844	-2.5907	-3.939	-4.0256
TRIM32	-0.5458	-1.1844	-1.5778	-1.8009	-1.4739	-0.685	-1.5649	-2.2311	-0.8494	-1.685	-1.811	-1.2653	-2.1779	-2.0469	-1.771	-2.2243	-0.7637	-2.2584	-2.071	-2.3659	-1.3585	-1.3548	-2.077	-1.0893	-1.811	-1.6259	-2.8678	-1.3004	-1.4739	-1.6215	-2.3292	-1.0439	-0.5907	-1.3328	-2.1649	-2.0954	-1.4699	-2.0291	-1.9885	-2.1844	-1.8836	-1.0862	-2.3437	-1.5995	-2.3147	-0.6171	-1.9379	-1.304	-1.8468
OBP2A	NA	NA	NA	0.2666	-1.9051	NA	NA	NA	NA	NA	-1.7515	NA	NA	NA	NA	NA	-0.2176	NA	0.5617	NA	NA	NA	NA	NA	-1.699	1.0151	-1.5479	NA	NA	0.3929	NA	-0.0218	-0.0604	-0.9971	-0.0574	NA	-0.5864	NA	NA	NA	NA	NA	NA	NA	0.4093	NA	3.3026	-0.3201	NA
RMI1	-0.6643	-1.1456	-1.4035	-0.0559	-0.7179	0.0676	-1.415	-1.2723	-1.3808	-1.2345	-1.3364	0.4626	-0.9296	-1.3548	-0.9771	-1.0619	-1.889	-0.6967	-1.0589	-1.1552	-1.077	-1.458	-0.5628	-1.2828	-2.1329	-0.5842	-1.0679	-1.5312	-0.4189	-2.1329	-1.9214	-0.1811	-1.2969	-1.4941	-1.4422	-1.8678	-1.0801	-0.5799	-1.2243	-1.1943	-1.5864	0.2376	-1.4982	-1.3846	-2.2379	-0.7394	-1.2584	0.315	-0.852
TAF1	-0.077	1.1283	-0.2092	0.6164	0.1043	-0.3603	0.338	0.3674	0.1532	-0.6416	0.8906	0.2558	0.2425	0.107	-0.243	0.7849	0.2166	-0.0786	0.6332	0.9007	0.5059	-0.2226	0.9252	-0.5585	-0.0336	-1.3846	-0.0454	0.9396	0.52	0.3092	-0.1488	0.3918	0.4751	0.3369	-0.3884	-0.3921	0.0936	-0.0145	0.1427	-0.1456	0.269	-0.5886	0.051	0.3057	0.5936	-0.6104	-0.5312	-1.1617	-0.2934
FBXW5	0.1941	-0.1047	-0.3529	-0.6038	-0.6148	0.2437	-0.3292	-0.1649	-0.2481	-0.1282	-0.1047	-0.1345	-0.4016	0.2738	-0.3346	-0.2515	0.1532	0.0215	-0.6394	-0.7155	0.4751	-0.074	-0.9324	-0.3129	-0.6016	-0.4305	-1.4074	-0.1811	-0.3364	0.0342	-1.4941	-0.0321	-0.221	-0.2916	-0.458	-0.55	-0.1297	-0.1568	-0.0544	0.9731	-0.6439	0.0186	-0.5208	-0.1313	-0.5416	-0.0725	-1.2481	-0.4364	-0.6689
GTF3C5	-0.9051	-1.4344	-1.5437	-1.4189	-1.255	-1.1203	-1.2515	-1.2793	-1.3111	-1.2481	-1.3111	-0.9379	-1.3959	-1.114	-1.3328	-0.889	-1.2934	-0.462	-1.0679	-1.5437	-1.2758	-1.4659	-1.2277	-1.2447	-1.7418	-1.4228	-2	-1.5649	-1.4035	-1.1943	-1.811	-1.1266	-1.2863	-1.2076	-1.8314	-1.5228	-1.0145	-1.1617	-1.5228	-0.9686	-1.8059	-0.9462	-1.6529	-1.3921	-1.4941	-1.035	-2.2042	-1.4501	-1.5105
TEX10	-1.3733	-1.6758	-1.6712	-1.8943	-1.7661	-1.486	-1.458	-1.6897	-1.5907	-1.4659	-1.7612	-1.662	-2.3219	-1.5606	-1.7179	-1.2898	-1.5146	-1.2515	-1.0619	-1.7084	-2.0058	-1.1681	-0.7612	-1.7418	-1.6304	-1.5146	-0.6897	-1.2413	-1.2515	-1.5187	-0.304	-1.5187	-1.5692	-1.2243	-1.4699	-1.8783	-1.6712	-1.5735	-1.6038	-1.4739	-1.8943	-1.7563	-2.2176	-2.4112	-2.0649	-1.7322	-1.3183	-1.5395	-1.2619
RPL35	0.622	0.0772	-0.0985	-0.0664	0.2437	0.5597	0.0731	-0.1345	0.679	0.2376	0.08	0.2277	-0.3585	0.1609	0.1401	-0.038	0.4071	0.3127	0.6772	-0.0816	0.0663	-0.1047	0.7338	0.0328	0.4657	1.0433	0.6699	0.2642	0.119	0.3138	0.2714	-0.1062	0.224	0.8082	0.1401	-0.281	0.2449	0.4668	0.7321	0.3718	0.0854	0.688	0.0704	-0.2898	-0.2602	0.5984	0.5069	0.3403	0.3896
PJA1	-0.1877	0.3984	-0.6943	0.2351	-0.48	-0.3659	-0.3808	0.24	-0.6967	-0.0233	0.6182	0.1801	0.1686	-0.6529	-0.3865	-0.5187	-0.9462	-0.2142	-0.5395	0.4563	-0.9686	-0.2277	-0.5064	-0.4208	0.1097	-1.2447	-1.3659	0.3505	-0.1828	-0.5479	0.6154	0.1467	-0.5002	-1.1234	-0.48	-0.5105	-0.4982	-0.9602	-0.8391	-0.2916	-0.1125	0.0621	-0.2042	-0.2898	0.0172	-0.7084	-0.7859	-0.6506	0.069
CCL21	2.913	0.5509	2.4934	1.7386	1.0014	2.7418	2.4468	1.1641	2.4725	2.2931	0.9508	1.5484	1.3237	1.8464	2.3702	0.6135	1.5622	2.5622	0.5221	1.7604	1.4531	2.7962	1.1349	1.0412	2.2582	2.952	2.1522	1.545	2.5558	2.1276	1.7613	0.2449	1.5286	1.1603	3.6724	2.1525	1.8691	0.5753	1.5965	2.7401	1.5246	4.1094	1.7294	1.5612	2.237	1.9165	1.5105	4.0036	1.4605
NUDT2	-0.48	-0.5543	-0.486	-0.6461	-0.9602	0.7966	-1.1203	0.069	0.5529	-0.6304	-0.55	-0.1376	-0.8059	-0.5187	0.0243	-0.3364	0.2738	0.1661	-0.4659	-0.5995	-0.5756	0.0229	-0.852	-0.8757	-0.1031	-0.2916	-0.7515	-0.811	-0.6484	0.8424	0.0412	-0.8135	-0.9686	-1.7084	-1.035	-1.3255	0.0524	-1.1234	-0.3058	1.0875	-0.6873	0.3618	-0.0985	-0.5146	-1.2277	0.0328	-1.9546	-0.152	-0.1763
AQP3	2.6175	3.8094	3.1773	3.9059	4.4822	2.0101	3.7344	2.3635	4.1473	4.0687	3.0978	0.4813	3.177	4.3813	2.1715	0.6808	2.8766	2.1635	2.9697	1.7895	3.9946	2.9875	1.5484	4.3074	3.0959	4.3597	3.4343	4.4316	2.6358	3.1561	1.1941	2.1557	4.5589	3.5777	4.0488	4.1977	1.9913	3.3827	4.2547	2.9674	3.1248	3.4155	3.6769	4.5945	3.5185	2.109	4.1043	2.86	2.3816
MCART1	-1.1649	-1.5479	-1.2109	-1.1584	-1.6126	-0.4325	-2.2379	-1.458	-1.1976	-1.3959	-1.852	-0.5628	-1.1203	-1.2934	-1.1811	-1.0801	-1.4941	-0.5692	-0.7539	-1.737	-1.4383	-1.2243	-1.3585	-1.9942	-1.5951	-0.5312	-1.4305	-1.5995	-0.9024	-1.7418	-0.1219	-0.4344	-1.699	-1.5064	-2.035	-1.8783	-1.4659	-1.5907	-1.9771	-1.415	-1.6126	-0.8135	-1.685	-1.685	-1.811	-0.7661	0.2129	-0.3111	-0.9799
FAM102A	0.7233	0.2363	-0.6758	0.1388	-0.5023	0.0454	-0.1488	1.0594	-0.3292	0.3674	0.0086	-0.4364	-0.3401	0.3288	-0.4247	0.8726	0.434	0.1349	-0.6758	-0.114	0.4415	0.3437	-0.2226	0.4027	0.5578	-0.725	0.2104	0.434	0.9508	1.4906	-0.3147	0.7924	0.585	-0.6529	0.2798	-0.1993	-0.4266	-0.3715	-0.2176	0.5636	-0.48	-0.4659	-1.2345	0.0552	-0.1828	-0.7346	-0.2863	-0.3165	-0.4442
HDHD3	0.544	-0.5125	-0.4659	-1.0559	0.08	0.0936	-1.776	0.545	0.3852	-1.1078	-0.7959	0.1506	-0.6506	-1.2828	-1.5907	0.929	0.1506	-1.0499	-1.3771	-2.1329	0.3663	-0.5842	-0.9885	-0.4074	-0.7322	-1.1746	-1.852	-0.9971	-1.2277	0.8992	-1.8573	-0.3846	-0.1779	0.3807	-2.3219	-1.3255	-0.3129	-0.7515	-0.331	0.545	-1.7322	-0.4941	-2.077	-0.4719	-0.9324	0.2277	-1.1649	-2.4189	-2.4659
COL15A1	5.9177	3.3106	6.5887	5.9889	4.254	5.3255	4.7698	4.2705	5.0747	6.0611	4.6719	6.3815	4.9741	4.9968	5.2895	5.5027	6.3102	4.3896	6.5367	6.3768	2.4797	5.8163	3.1805	3.9146	5.9392	6.6209	6.1121	4.2449	5.2468	4.1169	7.1447	3.1047	3.1641	1.0264	4.9435	5.1981	6.1898	3.742	2.9508	5.851	4.5211	5.7219	5.8364	4.8948	5.3023	2.7958	7.04	5.0875	6.1369
MAGEE2	NA	-0.16	-0.8651	NA	0.5965	-2.3219	NA	-1.1877	-1.1047	-1.5864	1.4746	-2.1329	-1.415	-1.6349	-1.8997	-1.2653	NA	NA	-1.6943	-1.5821	0.4813	1.5854	-0.9856	-1.3183	-1.6529	-0.1959	-0.6804	-0.3076	NA	-0.5756	NA	-0.725	-0.0072	1.3984	-1.2345	0.3874	-0.304	-0.1763	-0.3437	0.148	1.0086	-2.3884	-0.144	0.1941	1.0517	1.6462	-0.484	-1.4659	NA
KCND2	0.4605	-4.3335	0.2857	0.8568	-4.319	1.5984	-2.4344	-3.4564	-0.6666	-4.3076	-4.6118	-0.9406	-2.9105	-1.7563	-1.8783	-0.5002	-0.3183	-1.816	-0.1488	-0.5929	-3.4251	0.8074	-3.4949	-4.1766	-3.7027	-1.7612	-4.1405	-4.0661	-1.2176	-3	-0.4779	-3.3748	-2.9324	-3.436	-3.4143	-3.2243	0.1467	-1.8059	-3.4407	-0.8339	-2.7563	-1.6439	-3.1844	-2.5735	-3.3321	-3.4297	-0.6506	-1.9602	0.4782
ADK	-0.4699	-0.3474	-0.0664	-0.9462	0.4255	0.4636	-1.2653	-1.9602	-0.3437	-0.1993	-0.0559	-0.9602	-0.881	-0.9132	-0.3959	-1.7131	-0.6439	-0.0634	-0.074	-0.4247	0.2582	-1.415	0.2869	0.384	0.2412	0.2129	0.315	0.512	-0.3548	-0.7735	0.539	0.669	0.3242	-1.0619	-0.706	-0.5023	-1.0801	-0.685	0.6248	-1.2009	0.099	-0.3346	-0.484	-0.0174	-0.5228	0.3707	1.144	-0.3094	-0.1001
LEPROT	1.1499	1.5301	1.3522	1.1782	1.3824	1.2833	1.5271	1.5729	0.9252	1.3311	1.6196	0.8262	1.2073	1.2987	1.5705	0.8576	1.8608	0.818	1.4436	1.913	2.4076	1.2804	0.6031	0.9971	1.1473	0.9971	0.4926	1.5316	0.926	1.3248	1.7685	1.0201	1.3918	0.3741	1.3646	1.6924	1.4038	0.7899	1.5211	2.4133	0.9313	1.5724	1.5724	0.5888	1.8564	0.6415	1.6017	1.4849	1.5583
TRIM62	-0.1681	0.1097	-0.1047	-0.0291	0.1827	-0.7984	-0.1844	0.148	0.0072	-0.0529	0.2534	0.3391	0.0524	0.0704	0.0043	0.384	-0.4639	-0.2898	-0.074	0.1164	0.3984	-0.0174	-0.3346	0.2437	-0.2671	-0.3622	-0.7984	0.2376	-0.2898	-0.1536	-0.1392	0.7874	-0.16	0.4168	0.308	0.1903	0.3448	0.7286	-0.2481	-0.191	0.1763	-0.221	0.1635	0.3595	0.6526	0.3448	0.1789	-0.16	-0.484
F8A1	-0.2413	0.1414	-0.2447	0.0772	0.08	2.0769	-0.7859	-0.9518	-0.144	-0.1031	1.5336	-0.077	-0.5228	-0.8186	-0.662	-0.2464	0.1057	-0.4501	-0.8863	0.739	-0.2515	-0.6439	-0.7809	1.2546	0.3219	-1.527	-0.6416	0.3785	-0.1266	-0.3094	-0.6349	-0.3419	-0.5649	-0.456	-1.1617	-0.6439	0.0172	0.2203	-1.2723	0.1296	-0.035	0.1789	-0.6897	-0.0939	-0.2828	-0.2311	-1.5778	-0.9214	-0.8943
LOC201895	1.3567	1.8992	1.005	2.0902	2.3239	1.0036	0.962	1.7485	1.683	1.6526	1.5883	1.2504	1.2203	1.0122	0.9642	-0.3419	1.7062	2.0097	1.5878	1.6857	1.8339	1.3448	0.2016	1.4834	2.9302	1.1309	1.6763	1.7532	1.1421	1.6521	1.168	2.69	2.2147	1.5573	1.8691	1.5998	0.451	1.8836	1.4255	1.546	1.9233	2.1124	1.7908	1.8339	1.196	1.3846	1.8102	2.3386	1.2857
ABO	NA	1.545	NA	NA	1.1998	NA	0.6508	NA	0.9176	NA	1.1661	NA	1.0566	NA	0.0676	-1.737	0.7424	NA	NA	1.9616	0.8536	NA	NA	1.3271	NA	NA	NA	0.9657	NA	1.0243	NA	0.9222	NA	1.5356	NA	NA	NA	NA	NA	NA	NA	1.2363	NA	NA	-0.6439	NA	0.4668	NA	NA
CNOT10	-0.6943	-0.6735	-0.9214	-0.6735	-0.811	-0.304	-0.488	-0.5756	-0.3585	-0.6506	-0.482	-0.3094	-0.4189	-0.3921	-0.48	-0.5374	-0.4961	-0.364	-0.462	-0.7155	-0.5842	-0.8651	0.2412	-0.5374	-0.6484	-1.2413	0.1204	-0.4659	-0.5353	-0.7346	-0.8546	-0.5907	-0.6126	-0.5228	-0.6104	-0.9024	-0.8186	-0.5353	-0.7735	-0.454	-0.2898	-0.776	-0.6804	-1.1779	-0.8678	-0.7612	-0.5105	-0.3808	-0.6282
FOXE3	0.4468	0.1296	0.1467	0.4521	-0.1633	0.2216	0.1519	0.123	0.7664	0.511	-0.2498	0.9015	-0.0029	0.433	0.308	0.3173	0.3057	-0.0439	-0.1094	-0.125	0.8742	0.856	1.1744	0.2654	-0.0365	0.2302	2.2296	0.184	-0.016	0.2166	-0.48	0.7493	-0.041	-0.2619	-0.114	0.2449	0.3685	0	-0.0544	0.2104	0.0772	0.1057	0.1217	0.2582	0.2191	0.1283	2.1124	0.512	0.3242
ZWILCH	-0.8314	-1.9658	-1.4941	-0.8059	-1.3255	-0.2109	-1.0831	-1.7466	-1.7037	-2.4189	-1.5907	-0.7809	-1.1943	-1.1779	-1.1109	0.0524	-2.0954	-0.1156	-1.5907	-1.3183	-1.8211	-1.737	-0.0939	-2.8365	-2.1329	-1.1109	-0.8084	-1.3292	-1.2863	-2.4659	-0.8211	-2.458	-1.9159	-2.1016	-1.873	-2.0954	-1.5692	-1.2653	-2.0233	-1.2243	-1.3997	-1.2619	-1.3474	-2.1584	-2.2311	-1.5437	-0.9434	-0.7394	-1.221
PNMA2	-0.2193	1.54	-1.1109	-0.873	0.1699	-1.071	-0.0321	-0.2481	-1.1078	-0.6967	0.1532	-0.3529	0.127	-1.5735	-0.816	-1.5951	1.291	-1.685	-0.3677	0.0272	-0.9602	-1.1488	0.315	-0.8783	-2.4501	1.9149	0.2179	1.6211	-1.811	-0.881	-0.458	1.688	-0.7859	0.1017	-0.5228	-0.1125	-1.0439	0.9146	0.1916	-0.9856	-0.3846	-0.4208	0.3208	-0.0695	-0.5374	0.6341	1.5336	-0.1976	-0.4779
SCN9A	-0.486	2.3852	-0.5606	-0.1234	0.5321	-2.2793	-1.2515	-0.0786	0.1865	0.6378	0.1827	2.1994	2.5622	1.8464	0.4761	-4.3808	-0.4501	-0.662	-1.9434	2.1296	1.157	1.4662	3.3533	-1.3733	-1.0203	-1.4422	2.225	-1.5437	1.4217	-1.3997	-1.1617	2.254	-1.3696	1.905	0.4093	-0.9942	-1.2688	-0.4679	0.3718	-0.6758	0.5231	0.6088	0.5705	-1.6171	0.7407	-0.1504	0.844	2.26	0.6736
PTP4A3	1.196	0.4265	2.0611	0.8156	0.9199	0.5945	0.4201	-0.0233	0.6239	0.5821	-0.5416	0.8828	0.0881	0.8797	0.3573	1.3923	1.1137	0.4319	1.3086	0.0482	0.7604	1.8164	0.3807	1.1084	0.965	1.2636	-0.0862	1.025	0.9077	0.6332	0.7849	-0.482	0.1043	1.4005	0.7251	0.8294	1.2079	1.1077	2.6547	0.4761	0.6295	-0.0014	0.1137	0.1596	0.5646	0.8335	1.3956	-0.2328	0.5018
GLT28D1	-0.7884	0.1427	-0.4941	-0.6237	0.2726	-0.1016	-0.1376	-0.0634	0.6654	0.0029	-0.221	0.1467	0.0963	-0.1894	-0.3058	-1.0145	-0.0589	-0.6126	-0.5564	-0.1297	-0.6643	-0.2345	0.275	0.301	-0.0484	-0.0203	0.0454	1.4447	-0.9518	-0.7784	0.0454	-0.0306	-0.5543	-0.16	0.1903	0.044	-0.5166	0.9978	-0.6827	0.0426	0.1609	0.4265	0.7004	0.4626	0.2845	-0.3733	-0.2969	0.3208	-0.2845
CRIP2	0.547	1.5675	1.8722	0.9568	1.1538	0.1776	0.8221	0.2449	1.9527	0.9343	0.2485	1.818	0.9092	1.0676	0.0158	-0.3292	1.7853	1.7778	-0.0499	1.1164	1.3885	1.3028	1.1349	0.3951	0.4657	0.2004	-0.3715	0.1674	0.1557	1.0412	-1.0862	1.3528	1.0072	0.8311	0.3494	-0.2793	2.0766	0.4885	1.2963	-1.6712	-0.5416	1.113	0.0841	1.1023	0.739	1.8758	0.3391	0.5351	0.144
EDG3	0.3528	-0.0395	0.2666	0.2016	0.4709	0.3103	0.2253	0.1903	-0.2584	-0.038	0.0963	0.3311	-0.1584	0.3334	0.4834	0.893	-0.1282	0.0158	0.0058	-0.1187	0.0881	0.3918	1.0902	0.0731	-0.685	0.4584	-0.2498	0.0144	-0.2311	-0.281	-0.221	-0.1266	-0.2688	0.157	-0.226	-0.2294	0.2642	0.6544	-0.0649	0.8065	0.2786	0.5079	-0.0189	-0.1811	-0.0058	-0.0499	0.33	0.4038	-0.0589
LCMT1	-0.8084	0.103	-0.4189	-0.3603	-0.5973	-0.5606	-0.9051	-0.5951	0.2833	-0.5332	-0.7539	-0.077	-0.3292	-0.6259	-0.6873	-0.9714	-0.0469	-0.4208	-0.9379	-0.7909	-0.243	-0.8651	-0.6873	-0.606	0.0524	-0.6148	-1.3076	-0.488	-1.0291	-0.4286	-0.415	0.3763	-0.1472	-0.3004	-0.7418	-0.4228	-0.5416	-0.7515	-0.8417	-0.2328	-0.7859	-0.771	-0.7612	-0.144	-0.1125	-0.3827	-0.0247	-0.6038	-0.5125
MTHFD2L	0.1506	-1.2042	0.2054	-2.8783	NA	0.8408	0.281	-1.4779	-2.2447	-1.041	-2.3004	0.5008	-2.8997	-0.6349	-0.5606	-3.1844	NA	-0.2723	-0.3094	0.1699	-1.5395	1.6215	-1.949	NA	0.3763	-1.2379	0.6003	-0.7637	-2	-1.4699	-0.3237	2.3465	-0.0306	0.3357	-1.1078	-2.3511	0.2497	-0.3827	-1.3076	-1.1234	-0.0893	0.8408	-1.2009	-1.3364	-1.1234	0.1097	-1.771	-0.2515	-2.1976
CST1	2.5592	3.0668	3.7908	0.9373	3.1094	2.0851	-0.5522	1.3612	3.7398	1.0996	3.4738	2.3106	4.2479	2.2305	2.5218	3.541	2.176	0.0718	3.2484	3.7038	2.2351	0.7765	0.0129	0.1763	2.0573	5.0832	0.3115	1.7803	2.308	3.6508	-1.3219	1.9971	1.6924	1.3156	3.138	2.3374	2.9809	0.3663	0.9928	0.8032	1.1204	1.1037	2.1683	4.0968	4.0233	0.0909	3.1994	-1.2042	3.1006
HNRPH2	0.364	1.1177	0.4093	0.2191	1.1342	0.0454	0.2363	0.2618	-0.016	1.6239	1.2253	0.4751	0.1916	-0.1031	0.4362	-0.221	0.5321	0.175	0.5597	0.5636	0.0243	0.7689	0.0772	0.8115	0.2951	0.4468	0.5479	1.7502	0.4626	0.2582	0.9686	1.4436	0.6681	0.1763	0.7782	0.7621	0.257	-0.274	0.5955	0.9054	0.8969	0.3219	0.7647	0.7128	0.4287	0.719	0.7604	0.4521	0.7715
GPC5	-3.2109	-3.3808	-2.2176	-2.737	-3.4596	-3.8573	-2.2447	-2.2447	-2.816	-1.6943	-3.7622	-3.7622	-4.1329	-3.9817	-2.2311	-3.7312	0.5529	-3.4328	-3.6897	-3.2934	-2.3292	0.2091	-3.4204	-2.035	-0.8678	0.257	0.2104	-2.9324	-0.4779	-1.221	-2.5312	-2.5564	-1.9051	-2.8678	-1.685	-4.5735	-1.1078	-4.1228	-2.1976	-3.7389	-1.7661	-3.7293	-2.7274	-2.6349	0.0115	-3.4691	-3.035	-2.2176	-3.7959
NRBP2	1.0108	1.7874	1.4505	0.3391	1.4136	0.8852	0.4875	1.3346	1.058	0.903	1.3785	0.4895	2.1944	1.1852	0.9804	0.7748	0.5811	1.159	1.9833	1.5054	2.1372	1.4683	1.5979	2.7649	1.4787	0.0594	0.519	-0.0072	0.9575	1.3629	0.7476	3.0007	1.7583	1.537	1.1283	1.4158	1.0179	1.8703	2.3239	1.2491	0.0115	0.7373	0.539	1.2197	1.4356	1.2869	0.8828	0.992	0.4103
ADAMTS17	NA	NA	NA	-1.041	NA	NA	NA	NA	NA	NA	0.0215	-0.2584	NA	NA	NA	0.229	NA	NA	0.1763	0.4404	NA	-1.0499	NA	NA	NA	NA	NA	NA	NA	NA	NA	NA	NA	0.0759	0.0607	NA	NA	NA	NA	0.2558	NA	NA	NA	NA	NA	NA	NA	NA	NA
STARD5	1.2534	-0.2026	0.0827	-0.5778	NA	NA	0.0936	-0.1926	0.3763	-0.0529	-0.7084	-1.1714	-0.144	1.2582	0.6627	0.6736	-0.5628	0.9891	-0.4739	NA	NA	0.0621	NA	NA	0.7655	NA	0.1789	NA	NA	0.7765	0.1164	-0.7155	0.0058	NA	NA	0.9061	0.0663	-1.6804	NA	-0.8625	-0.5023	0.6933	NA	0.2928	NA	0.5821	NA	NA	NA
MTCP1	-0.2059	0.1583	-0.144	0.8703	0.4947	2.4049	-0.1297	-1.0145	-0.5564	-0.2793	4.0241	0.4813	0.1414	-0.394	-0.1125	-0.7859	-0.191	0.9738	-0.2969	1.6503	-0.1959	-0.1665	-0.1617	0.4147	0.0115	-1.2793	-0.4055	0.7251	0.1336	-0.7563	0.1596	-0.0544	-0.1109	-0.3715	-0.2345	-0.2934	-0.3004	0.539	-0.7637	-0.3585	-0.0306	1.4103	-0.5208	-0.071	0.269	-0.5886	-1.4699	-0.0291	-0.3273
ATF7IP	-0.041	-0.2863	-0.3659	-0.9406	-1.0862	-0.3865	-0.7859	-0.9051	-0.5886	-1.4228	-0.2898	-0.4305	-1.1811	-0.737	-0.7588	-1.3401	-0.9159	-0.3437	-0.2602	-0.7298	-0.5628	-0.9828	-0.9942	-1.2863	-0.8704	-0.6237	-0.1125	-1.0801	-0.5821	-0.749	-1.114	-0.6781	-0.8443	-1.3364	-0.7226	-1.5146	-0.0262	-0.7637	-0.9187	-1.1361	0.1738	-0.6171	-0.8836	-1.0529	-0.889	0	-0.8757	-1.0262	-1.1047
SVOP	-4.4266	-4.195	-5.2433	-5.0256	-3.9302	-4.2821	-4.3748	-4.3629	-5.093	-3.9434	-3.7217	-5.035	-4.6693	-3.81	-3.071	-3.8678	-5.0589	-4.3306	-4.161	-4.9302	-4.3748	-4.7486	-3.8804	-4.0783	-4.5666	-4.6878	-4.6953	-4.6767	-5.2433	-4.3306	-4.2905	-5.7563	-4.8242	-4.2488	-4.904	-3.9635	-4.3047	-4.0209	-4.5632	-4.0116	-3.968	-4.4328	-3.8365	-4.5977	-5.2765	-4.2488	-5.357	-4.6259	-4.6475
EFNA1	1.0086	2.7176	3.1693	1.751	3.4542	2.3643	2.201	2.4489	2.8866	2.808	2.2354	2.2019	1.8074	1.7832	1.6178	2.9389	2.2213	2.6812	2.7392	1.7062	2.6124	1.3494	1.7945	3.6159	2.852	0.9686	1.8363	3.1675	2.596	3.0893	0.5008	2.5203	2.7611	2.5054	1.905	3.6792	3.1396	3.3519	2.3649	4.1085	2.0363	1.364	2.3103	2.6533	3.3234	1.2259	2.1725	1.9902	1.2091
HCN1	NA	NA	NA	1.3179	NA	NA	NA	NA	NA	NA	NA	NA	NA	NA	NA	NA	NA	NA	NA	0.6022	NA	NA	NA	NA	NA	NA	NA	-0.5864	NA	NA	NA	NA	0	NA	NA	0.2786	NA	0.3863	NA	NA	NA	NA	NA	1.5281	4.2055	NA	0.6835	NA	0.9222
PARN	-0.3696	0.0229	0.0144	0.08	-0.0679	-0.6394	-0.274	-0.4286	0.8496	-0.5374	-0.3058	0.099	-0.2076	-0.1203	-0.7442	-0.7563	0.364	-0.5084	-0.4305	-0.8783	-0.0755	0.6699	-0.9546	-0.281	0.107	-0.749	-1.2243	-0.0439	-0.7909	0.2388	-0.2294	-0.482	0.542	0.763	-1.0145	0.3994	-0.5756	-0.7959	-0.6259	-0.0203	0.0524	-0.6529	-0.873	-0.1031	0.0356	-0.2159	-0.0189	-0.6666	-0.5146
C10orf11	2.109	2.3202	0.7664	1.8941	1.9989	1.6808	1.7549	1.6313	2.177	1.7381	2.6781	1.2296	1.4772	1.7562	2.2079	-0.2109	1.3702	3.0442	1.2612	0.5772	1.8057	2.037	-2.3147	1.8584	1.9385	-0.6666	0.9389	2.6787	1.757	1.829	0.2485	1.1467	2.6074	1.0475	1.0861	1.8363	1.6754	1.4605	2.1247	0.9538	2.6902	1.6154	1.5622	1.5316	1.5216	1.3317	1.2552	1.4926	1.5797
PLXNA3	0.7858	0.157	0.7681	0.294	-0.0908	0.8343	0.1776	-0.7226	-0.7346	-0.5585	2.2714	0.6717	0.7163	0.4201	0.5241	1.442	0.0841	0.4584	0.2774	0.2079	0.3807	0.3595	0.7941	0.4573	-1.191	0.8254	-0.1617	0.5509	-0.5105	0.1414	0.6452	0.9268	-0.1047	0.3196	-0.0277	-0.8573	0.5936	0.6987	0.6285	0.2738	0.8969	1.5979	0.5548	-0.2828	0.5955	0.4297	0.5984	1.5425	0.7587
AR	0.0621	2.5155	0.3311	-0.6943	1.1622	2.3802	-0.0145	0.2079	-0.3846	0.4297	1.7053	-0.6148	-1.4659	0.281	0.2522	-0.4982	-0.0695	-1.1877	0.3185	1.4478	0.1493	0.3022	-2.3959	2.9285	-0.454	-0.3585	-0.8916	-0.6082	0.8999	-0.4719	-1.0058	-1.8836	0.058	-1.0291	0.5069	2.3931	2.4038	0.8671	-1.4035	-3.3076	2.1734	-0.6394	0.6727	0.7647	1.729	-1.8417	-1.4779	-0.7984	0.3539
C1orf21	-1.2723	-0.8546	-0.9132	-0.1408	-0.4481	0.5271	1.2963	1.3448	0.0072	1.7587	1.2684	-0.4344	-0.6781	-1.3733	-0.1062	1.6135	0.275	0.1953	0.2534	-0.9159	-0.7884	-0.5886	0.7536	2.1635	-0.1861	-2.458	-0.1877	1.0628	0.0058	0.473	-1.8314	-0.3921	1.3317	0.3863	0.514	1.9373	-0.662	0.2582	0.751	-2.191	1.0841	-0.8314	0.5221	0.606	1.1609	-1.6394	-0.7735	-0.1456	-0.1665
FTO	-0.415	0.585	-0.3696	-0.0365	0.2461	-1.3292	-0.3147	-0.488	-0.2881	0.1661	-0.0619	-0.6712	-0.2464	0	-0.46	-0.4779	0.1362	-0.5692	-0.3129	0.175	-0.0816	-0.5105	-0.567	-0.0619	0.6088	-0.6758	-0.6416	0.0841	-0.5084	-0.144	-0.5606	0.2339	0.4584	-0.3237	-0.3474	0.0043	-0.016	0.1124	-0.6349	-0.5374	-0.1361	-0.3094	-0.3715	-0.3419	-0.071	0.3994	-0.9828	-0.7442	-0.415
FGF3	-0.1976	-0.0058	-0.1172	-0.0939	0.1043	-0.0923	0.3595	0.4136	-0.6171	-0.2653	-0.1329	0.1865	0.355	0.3539	0.2179	0.513	-0.5395	-0.8034	0.1217	0.3068	0.4478	0.1966	0.2412	0.0158	-0.5606	-0.0277	-1.1016	0.1164	-0.3364	-0.2515	-0.3401	-0.364	-0.0589	0.3231	0.2104	-0.114	0.3505	0.3685	-0.1552	0.1017	-0.1844	0.03	0.0115	0.2821	0.1362	0.1388	-0.8783	0.2857	-0.2042
TMEM45A	0.9161	0.583	-0.1329	-0.48	-2.3511	-1.191	-0.3959	-0.1617	-0.152	0.1916	-1.9828	1.2636	-0.7539	0.3426	-0.9434	-1.3076	0.2091	1.2302	-0.8783	0.3718	2.2744	1.1519	-0.3733	-1.3183	0.3918	1.101	-1.6259	-1.4305	-0.4035	-0.2533	0.547	-2.3219	-1.7563	-3.2934	-0.5585	-0.606	-0.3401	-2.077	-1.7612	2.0493	-0.6873	1.903	0.0881	-0.9462	-1.0203	-0.7539	-1.3474	0.5049	1.1473
CRLF2	0.2473	-0.2987	-0.7859	-0.9885	-0.9828	0.4082	-0.9379	-0.8135	-0.1376	-0.5187	-0.6461	-0.1094	-0.0786	-0.5842	-0.9078	0.5685	-0.3978	-0.771	-1.221	-0.7784	-0.0831	-0.6193	-0.2126	-1.0619	-0.55	-0.7834	-1.3183	-0.7686	-0.897	-0.8468	-1.8059	-1.2828	-0.4699	-0.1959	-0.5907	-1.1329	-0.5228	-0.7322	-0.7084	-1.0831	-1.2515	-0.7442	-0.55	-0.9914	-1.3771	-0.9024	-1.4035	-1.7322	-1.2828
RBPSUH	0.8057	0.2833	0.2166	0.6969	0.6987	-0.191	0.5617	0.2774	-0.2109	0.5079	0.516	0.515	0.1738	0.7013	1.511	-0.4093	0.1003	0.8891	0.648	0.8148	-0.0619	0.2642	0.7689	0.3785	-0.5479	1.4185	0.7128	0.6341	0.406	-0.3022	0.852	1.0419	0.3288	-0.3677	0.8836	0.4489	-0.1795	0.0881	0.5221	0.1991	0.6544	0.5821	0.688	0.2774	0.7527	0.2314	0.3231	1.3414	1.2357
RASGRP1	2.803	0.6951	1.0349	1.2588	1.4383	0.1097	0.5926	0.6088	1.1667	2.2612	2.2007	2.2394	0.2376	1.6799	1.3663	1.3561	3.0437	2.0025	-0.0831	0.6192	1.1596	2.0229	0.2473	1.0101	2.1776	1.26	1.8639	1.7394	1.7163	0.6211	1.0115	0.7807	2.8492	0.8616	2.2085	1.0307	0.704	0.8007	1.9657	2.3516	2.0321	1.2473	3.1814	1.0841	1.229	2.3868	0.7858	-0.1926	2.0169
ZMAT3	0.6489	1.3363	0.5685	-0.5543	-1.2109	-1.4112	-0.9078	-0.0116	0.6107	1.2314	0.1322	-1.2863	0.0468	-0.2362	0.0158	-1.0174	1.4957	0.648	0.148	-0.7984	1.0942	0.6079	-1.0529	-0.2567	1.3045	-0.1031	1.6079	0.2642	-0.1943	0.518	0.281	1.1243	0.6617	0.5597	0.1124	-1.3884	-0.7686	-1.1649	0.4668	-0.8943	0.6544	-1.2243	-0.1078	-0.9351	-0.7784	1.1801	1.6862	-1.2076	0.5241
TCEAL8	0.3685	1.373	-0.1172	0.584	0.9855	0.1801	0.3807	-0.0589	0.3161	1.2473	1.2768	0.0342	0.9635	-0.1894	0.3161	-0.9324	0.5878	0.2104	0.4761	1.06	0.229	0.7181	0.6107	0.6987	0.5321	0.2821	-0.6016	1.9479	0.0895	-0.274	1.7403	0.3984	0.7093	0.4287	0.384	0.5548	0.294	0.03	0.3852	0.6088	0.8106	0.1903	0.6906	0.9568	1.0222	0.1336	0.4436	0.6808	0.8883
PH-4	0.4967	0.1454	-0.077	0.4276	-0.071	0.1017	0.7941	0.5936	0.5734	0.9321	0.5588	0.1519	0.3973	0.7004	0.3196	0.5509	0.8408	0.0827	0.8813	0.1217	0.929	0.6369	1.2154	0.8237	0.2054	-0.0954	0.1322	0.4457	0.384	0.4457	-0.9686	1.1395	0.2738	0.9767	0.6933	0.3752	0.2154	0.9833	0.7647	-0.0877	0.0895	-0.2193	0.3774	0.4168	0.6462	-0.077	0.7251	0.5984	0.0029
ZBTB41	-0.6827	-0.0484	1.4044	0.2738	0.6229	0.4531	-0.2567	0.0827	0.7999	-0.9828	-0.0043	0.5763	-0.8186	-0.5023	-0.6689	-0.3004	0.2016	0.7233	1.7566	0.1296	-1.3292	-1.3255	0.9015	0.1953	-0.1746	1.5656	0.4071	0.3045	0.0342	-0.3255	-0.0499	-0.2498	0.5099	-1.3328	-0.304	-0.486	0.1966	-0.1665	0.5974	-0.4422	0.8359	0.6969	0.0895	-0.6827	-0.1552	-0.5084	0.9358	0.4895	0.037
SPARCL1	6.8691	6.1912	7.3681	7.0672	6.4323	5.8787	7.3056	7.6044	6.5021	8.7512	7.1148	5.4722	5.8319	7.1365	7.858	4.975	7.0853	6.732	6.2692	7.9212	5.5059	8.4309	3.9991	7.4537	6.7879	7.511	8.4081	6.848	8.1724	7.0553	6.6032	5.8892	7.1599	6.3971	8.591	8.0704	7.4271	6.78	6.7032	4.6662	6.3763	6.6823	7.9836	7.5094	6.9715	5.7309	8.1694	7.2298	7.487
ALS2CR19	1.4823	2.6524	0.9627	3.0611	2.0759	0.1596	1.3539	4.121	1.7702	1.3595	0.6107	0.6727	0.9767	2.4238	1.5105	1.2479	1.6374	0.7207	1.224	2.9075	1.0079	1.3214	2.8893	1.3994	1.5917	NA	2.3677	1.6083	2.1177	0.1137	1.6192	3.1322	2.1194	2.5907	2.1577	NA	2.3337	3.7814	1.9389	0.7816	-0.144	1.2928	-0.5353	1.4206	2.1506	1.2314	2.0169	0.5578	-0.7037
USP47	-0.2898	0.7941	0.6517	-0.4016	0.9471	-2.5479	-0.2176	0.03	0.4626	-0.1779	0.8383	-1.9214	-0.5312	-0.8135	-0.7418	-1.3076	1.1355	0.0976	0.2714	0.1966	0.5479	-0.454	-1.3147	0.3907	0.7799	-0.8135	0.8303	0.6844	-0.6597	0.7974	-0.3997	0.2857	1.1057	1.1043	0.127	1.5361	-0.9602	-0.4247	0.3951	-0.1861	-0.0559	-0.1763	-0.3419	1.0043	0.2412	-1.152	-1.9602	-1.5735	0.3242
APLN	1.3109	0.08	2.5286	1.0201	0.9486	2.8494	0.926	-0.0939	0.0949	1.9287	5.3129	2.4759	2.0721	1.2443	1.517	1.9392	1.8639	0.8836	1.8274	2.3369	3.8339	3.7442	1.5811	2.3805	-0.243	2.0286	0.7373	2.7908	2.4875	-0.8863	0.5529	1.7264	1.1017	3.295	0.6617	1.3606	2.7106	0.9657	0.0058	-1.527	0.3606	1.067	-0.0985	0.6699	2.1979	1.539	2.6597	2.7066	3.1454
CNNM3	-0.9324	-0.5522	-0.5799	-0.6038	-0.7859	-1.3183	-0.725	-0.394	-0.454	-0.9462	-0.0395	-0.3474	-1.0985	-0.771	-1.1976	-0.889	-0.2706	-0.7274	-0.6439	-0.5995	-0.6827	-0.8863	-0.2362	-0.4247	-1.2898	-2.1714	-1.8059	-1.3004	-1.0174	0.0356	-2.2447	-0.852	0.0841	-0.6461	-1.5692	-0.699	-0.3677	-0.8494	-1	-0.8997	-1.7037	-1.9051	-1.5437	-0.7346	-0.2602	-0.7013	-2.077	-2.1016	-1.9942
FAM104B	-0.2584	-0.0634	0.0398	0.364	2.0335	-0.097	-0.0262	-0.4921	-0.9024	0.0704	0.5281	0.148	-0.3237	-0.1697	-0.1156	0.0594	-0.1047	-0.3383	0.0663	0.6211	-0.5842	0.1217	0.6535	-0.2109	-0.2092	0.2351	0.2265	0.5281	0.5241	-1.2042	0.9191	0.45	-0.1062	1.1017	0.315	0.308	0.0922	0.4468	0.4351	0.144	-0.1959	0.0115	0.4489	0.1648	0.308	-0.3273	-0.2076	1.0093	0.1622
C17orf70	-0.7346	-0.8339	-0.0908	-0.7037	-1.6259	-0.1109	-0.8417	-0.9686	-0.881	-0.5228	-0.6735	-0.5105	-0.2464	-0.7084	-1.0589	0.0201	-0.5585	-0.4659	-0.9351	-0.5995	-0.0939	-0.6574	0.058	-0.7959	-0.6082	-0.8009	-2.3884	-1.1844	-1.0029	-0.6038	-1.8943	-0.7539	-0.5692	-0.6259	-0.5864	-0.4921	0.7119	-0.5395	-1.0233	-0.2723	-1.2758	-0.9546	-0.9546	-0.1156	-0.2951	0.263	-1.9379	-0.7108	-1.1943
SHQ1	-1.071	-0.8468	-0.5353	-1.3921	-0.8009	-0.5929	-1.662	-1.1456	0.2154	-0.7202	-1.074	-0.191	-1.1681	-1.8468	-1.3076	-1.852	0.2738	-1.2142	-1.4461	-2.4739	-0.7084	-0.776	-1.8365	-0.6237	-0.6326	-0.7809	-1.0985	-0.4521	-1.0233	-0.1125	-0.7588	-0.5973	-0.456	-0.897	-0.881	-0.9269	-1.1392	-1.3846	-0.9187	-0.7637	-0.3511	-0.7859	-0.8678	-0.897	-1.1172	-0.4699	-0.9024	-0.7735	-0.7784
KIF21A	-2.2723	-0.4659	-0.0529	-1.2481	-1.1297	-1.4189	-2.9771	-0.5799	-0.6326	0.6581	-1.4383	-1.1172	-1.1392	-1.5649	-3.1456	-0.9241	-0.1361	0.6763	-1.6171	-0.1031	-0.8009	-1.5023	1.7398	-0.1329	1.0676	1.5494	1.3219	-1.4422	-0.7984	-0.5084	-0.8651	0.4885	-1.1649	-0.5907	-0.4344	-0.3511	-1.1976	-1.3548	-0.771	0.8496	-0.2688	-0.4035	-2	-0.0101	-1.8009	0.8123	0.0621	-2.4266	0.1979
AMDD	1.338	3.5185	0.0676	2.2881	2.2446	2.5316	2.1811	2.2116	2.3371	1.8592	2.7824	2.4613	2.4391	2.5842	1.7225	1.0475	1.4678	2.722	2.1349	1.5622	2.2023	3.2402	2.488	2.2954	1.5573	0.4875	0.1243	1.3774	1.9103	1.629	0.4854	3.2374	1.9749	1.7355	1.6187	1.5543	1.7194	2.3926	2.0649	3.1996	1.7879	1.3973	0.9935	1.5084	2.1263	0.1204	1.7128	1.3138	0.7933
GTPBP6	-0.4521	-0.226	-0.2969	-0.8651	-0.2671	-0.8783	-0.527	-0.8186	-0.7784	-0.4344	1.1865	-1.2653	-0.6666	-0.5105	-0.5374	-0.4779	-0.5208	-0.8863	-0.9105	-0.2758	-1.0619	-0.7226	-0.4189	-0.3147	0.1257	-1.7515	-1.4074	-0.897	-0.1633	-0.9379	-1.0262	-0.6574	-0.5249	-0.2109	-0.5043	-0.3437	-0.5606	-0.4461	-1.1047	-0.8783	-1.2413	-0.9105	-0.7226	-0.55	-0.5208	-1.3437	-2.1392	-1.1552	-0.9187
ATP6AP2	0.8592	0.9657	0.6415	0.8512	0.7119	0.1177	0.4114	0.0524	0.3103	0.6663	1.2351	0.8504	0.7765	0.3994	0.9077	-0.5907	1.0286	1.0384	0.189	0.7066	-0.2294	0.9583	0.4926	0.3696	1.3254	0.1124	1.342	0.6415	1.2016	0.6654	1.5763	1.0779	1.0186	0.058	0.0468	0.8624	0.115	-0.6259	0.4761	-0.077	0.1137	0.1789	0.7858	0.3323	0.8205	-0.2345	0.0356	0.6889	1.2696
MAGEA11	-3.9748	-4	-3.0954	-4.2297	-3.7274	-3.0954	-3.9568	-4.5977	-4.5564	-4.6153	-3.0589	-4.2905	-3.5096	-4.553	-4.5228	-4.4081	-3.8804	-0.9324	-4.4143	-4.1028	-3.3219	-3.6804	-2.4501	-3.812	-4.5262	-3.4884	-3.5047	-3.6767	-4.1153	-4.1714	-3.4391	-3.3292	-2.6259	-3.1329	-3.1584	-4.4235	-3.872	-3.1329	-2.5995	-4.3076	-3.4375	-3.2243	-3.1976	-3.5873	-4.6295	-4.1507	-3.1329	-3.2109	-4.0023
IPF1	0.0086	-0.0544	NA	NA	0.2314	0.6107	NA	NA	0.9426	-1.0862	0.4573	0.4885	0.7647	-1.4501	-0.8678	0.9679	0.3539	0.5018	0.148	-0.8186	NA	-0.7442	NA	NA	1.0538	-0.7661	-0.4055	0.2412	NA	0.4967	-0.1047	0.3852	2.0919	0.6645	NA	-0.038	NA	-1.0116	0.7655	0.6897	1.3202	NA	0.9942	0.6145	-1.2688	0.2654	NA	NA	-0.5023
CD19	3.591	3.7027	2.2904	3.4168	2.9692	2.6246	3.9864	4.4026	3.0411	4.3399	2.2798	3.3044	3.2214	5.1289	0.9605	3.5336	2.4839	3.8248	1.514	2.4174	2.957	4.5373	2.6617	2.3127	3.925	3.6404	4.0514	1.8512	4.2847	3.5886	3.9126	1.3494	0.0895	2.1779	4.8851	3.2543	2.9356	2.5142	4.2935	4.4496	4.6707	3.6135	3.8649	3.8768	2.5356	3.6311	1.419	1.8746	3.1403
CDCP1	0.7983	-0.1392	-0.4901	0.0129	-1.3548	0.4082	0.2437	0.6182	-0.3076	-0.6371	-0.4247	0.0286	-0.458	0.099	0.0922	1.1243	0.3918	-0.2294	-0.0544	-1.0058	0.3595	-0.454	-3.0954	-0.2987	-1.458	-1.454	-1.8573	-0.484	-1.1266	0.3138	0.4005	0.2203	-0.458	-0.0439	-1.1172	-1.1172	-2.2176	-0.0664	0.1827	0.1865	0.1003	-0.3219	-0.2226	-0.8704	-0.6597	-0.3401	0.0895	1.1706	-0.0847
PHF16	-2.071	-0.889	-0.0058	-1.5395	-1.0262	-1.6574	-2.7274	-3.0831	-1.9885	-2.2311	-0.949	-2.6439	-1.3548	-2.8365	-2.1584	-3	-0.725	-0.5043	NA	-1.8468	-1.0862	-0.873	-1.9434	-1.0499	-0.6827	-2.0589	-0.454	-1.5187	NA	-0.9714	-2.2653	-0.9914	-0.0029	0.3718	-1.2898	-2.6259	-1.6038	-2.1844	-0.8916	0.6388	-1.5479	-1.4739	-1.191	NA	-2.1976	-1.2758	-0.3902	-1.3255	NA
MRPL45	-1.4074	-1.1266	-0.5864	-1.041	-1.2898	-1.0029	-0.6804	-1.304	-1.0087	-1.2619	-0.6326	-1.1844	-1.1172	-1.2345	-1.4305	-0.5187	-1.1746	-0.8059	-0.4679	-1.0679	-1.1976	-1.811	-0.8943	-1.3548	-0.6735	-0.484	-0.873	-0.8314	-1.5023	-1.4228	0.3863	-1.2619	-0.8704	-1.1172	-0.8783	-1.3921	-0.8916	-1.1584	-1.2619	-1.3659	-1.038	-0.9518	-0.7784	-0.5564	-1.1746	-0.4442	-0.5146	-1.1617	-1.077
CBFB	-0.7637	-0.3997	-0.6394	-0.4074	-0.5995	-1.0439	-0.1125	-0.4901	-0.0589	-0.2311	-0.5249	-1.2828	-0.8339	-0.6574	-0.3492	-0.5842	-0.7909	-0.5543	-1.114	-0.4442	0.0086	-0.9914	-1.1779	-0.5735	-0.2026	-0.144	-0.5228	-0.0877	-0.8546	-0.304	-0.6461	-0.3752	-0.4501	-0.8704	-0.3959	-0.2688	-1.0923	-0.9686	-0.6282	-0.6529	-0.0145	0.0272	-0.1234	-0.9771	-0.243	-0.3004	-0.749	-0.4364	-0.0664
KCNAB1	1.2247	0.636	0.8671	1.1979	0.4308	0.6781	1.5064	0.4916	0.5519	0.8552	0.7604	0.315	0.5018	0.539	1.378	0.3674	0.7757	-0.0072	1.1795	0.8286	0.269	0.696	1.148	2.8057	0.5685	1.406	-0.0877	1.3685	-0.1345	-0.3094	-0.2863	0.175	1.1257	1.3818	1.3994	0.9738	0.6978	0.9978	1.7723	-0.7809	1.1609	0.7172	1.1382	1.5922	0.6126	1.9471	1.0963	NA	1.157
TUBB4	-0.1763	-0.0439	-0.7834	-0.4344	-0.454	-0.2226	-0.2193	-0.6104	-0.2567	-0.3846	-0.1552	-0.3129	-0.3183	0.3885	-0.6529	0.3785	-0.6712	-0.1504	-0.2026	-0.1552	0.1084	0.2963	0.7355	-0.4093	-0.7084	0.0328	-0.2602	-0.488	-0.6304	-0.5713	0.434	-0.1681	-0.699	-0.0619	-0.6827	-0.4521	-0.2109	-0.2706	-0.2706	0.2179	-0.2362	-0.7322	-0.2758	-0.6689	-0.4364	-0.6282	-0.9214	-0.6148	-0.9462
SLC34A3	-0.3058	-0.0499	-0.2951	0.0086	0.1349	0.2582	0.4351	0.5792	-1.038	-0.5585	0.0663	0.115	0.175	0.4308	0.3718	1.1322	-1.0923	-1.1392	0.1801	0.5211	0.5705	0.107	0.224	-0.1031	-1.5105	0.2892	-1.2345	0.2191	-0.4344	-0.6148	-0.3808	-0.3585	-0.2159	0.2253	0.3219	-0.4266	0.144	0.2179	-0.1376	0.1738	-0.0695	-0.1649	-0.0589	0.1401	-0.0908	-0.1779	-0.7539	0.5271	-0.3147
PDGFA	0.148	-0.1649	0.8139	0.9061	1.569	-0.8678	1.115	1.3934	1.4699	1.7442	1.0559	0.6897	1.26	1.3901	0.6239	1.058	1.2963	-1.811	0.976	1.8383	0.8766	1.237	2.3303	1.9385	0.8742	1.5013	0.3357	0.9546	0.6489	0.7664	-0.4961	0.4668	0.9531	0.7849	0.9434	1.3584	0.6443	1.2327	0.8464	0.8221	-0.3383	1.3807	0.6599	1.0594	2.4919	-0.8443	2.378	0.7233	1.7732
HLA-C	3.3262	1.7429	1.7264	2.7985	3.138	3.1776	1.8528	2.2231	2.84	1.7515	2.3048	2.972	2.3654	1.9404	2.5084	1.1972	3.332	3.147	0.5898	2.1519	1.0854	1.9819	-0.3201	1.4457	3.4476	1.516	2.1013	1.5425	3.3561	2.5566	1.2308	2.3553	2.0108	1.6889	1.3454	2.669	1.726	2.2175	1.745	2.6278	2.0247	2.1667	1.629	2.7257	2.6462	3.1722	-0.5522	1.7022	2.0047
HPRT1	-1.038	-1.2345	-0.6282	-0.1282	-0.5842	0.0482	-1.2345	-1.3771	-2.2109	-1.2142	-1.8009	-0.456	-0.3771	-1.4383	-0.9942	-0.706	-2.2584	0.4082	-0.889	-0.9771	-0.8288	-1.486	-0.6506	-1.8417	-1.2042	-0.7834	-0.2584	-0.5312	-0.5585	-2.077	0.8718	-0.6827	-1.3292	-1.3004	-1.2413	-2.1266	-0.8365	0.1084	-1.3111	-0.6326	-0.8546	1.7133	-1.1746	-1.3437	-1.5105	-0.46	-1.2898	-0.5543	-0.4961
MTG1	-1.3511	-1.2969	-0.9324	-0.7637	-1.0649	-0.5043	-1.3696	-1.0619	-0.0321	-0.9159	-1.2176	-0.4093	-1.1109	-0.7686	-1.5228	-0.4016	-0.3094	0.3818	-1.0116	-1.5606	-0.4055	-0.9159	-0.5929	-1.0831	-0.3808	-1.9714	-0.2277	-1.1456	-0.949	-0.1828	-1.038	-1.0233	-1.0801	-0.963	-1.7809	-1.1552	-0.2951	-1.3401	-0.873	-0.3733	-1.0058	-1.3959	-1.415	-1.0116	-0.6506	-1.071	-0.5064	-1.4501	-1.3076
ZNF659	0.3885	1.127	0.544	1.3465	-0.7934	-0.3902	-0.4521	0.546	1.2839	0.5261	-2.0649	-1.9379	-0.4247	-1.0439	0.8789	-2.0233	0.8416	-1.2828	1.119	-0.7539	3.6229	-0.0116	-2.0954	NA	1.3202	0.069	-1.1329	-0.8084	-0.3076	0.2869	3.2479	-1.5649	-0.0203	-1.1016	1.7247	-0.3165	1.5049	-1.0174	-1.4189	0.1388	-0.1811	0.6781	1.6452	0.2029	-0.7108	0.0881	1.1375	3.7257	3.0289
ITGBL1	3.4236	4.0548	3.7027	2.6332	2.0618	2.1063	2.8836	2.8141	3.5692	3.6633	4.516	2.734	2.994	3.5729	3.4182	2.4746	3.0986	2.0827	3.1424	4.812	1.9939	4.106	0.2833	2.8663	3.5173	4.5053	2.1677	2.1104	3.3159	1.8875	3.3618	1.2732	3.7409	0.7774	4.1707	3.8309	3.8718	2.6886	2.6521	2.5743	1.7853	0.9305	4.5783	4.2913	4.4053	-0.2845	3.0937	1.7093	3.1124
USP19	-0.7563	-0.6712	-0.9159	-1.3733	-1.811	-1.2447	-1.6529	-1.152	-0.0291	-0.9714	-1.0529	-0.9658	-1.4305	-1.5564	-1.6215	-2.2243	-0.1313	-1.074	-1.7661	-2.3511	-0.4364	-0.7418	-1.2176	-0.5778	-1.4659	-2.4739	-2.077	-1.5395	-1.1811	-0.226	-2.8573	-1.2176	-0.2723	-0.7637	-1.6574	-0.8783	-0.8339	-2.1266	-1.0589	-1.0985	-1.3959	-2.1779	-1.4501	-1.1234	-1.0985	-0.6827	-1.7226	-2.6171	-2.3959
ZBED2	0.0538	-2.889	-2.5479	-2.2243	-0.8599	-3.2793	-0.6689	-0.458	-2.6082	-2.0174	-2.1779	-1.8314	-0.8365	-0.6349	-1.5187	-1.6574	-1.454	-0.243	-2.1329	-2.077	-4.028	-1.0679	-2.6712	-2.9324	-1.9214	1.2339	0.5008	-3.7009	-0.4266	-1.2934	0.537	-3.5228	-0.8443	-3.6493	-1.8009	-2.8783	-3.0116	-2.2584	-1.5023	0.3885	0.0072	0.3674	-2.5146	-1.7466	-1.9324	0.5361	-3.0831	-1.816	-0.2176
KATNA1	-0.5842	-0.9799	-0.3622	0.3219	-0.4247	-0.1376	0.1583	-0.5332	-0.0203	0.1519	-0.2515	0.0356	-0.4779	-0.2845	-0.1811	-0.889	-0.1976	0.3346	0.0172	-0.3255	-0.8084	-0.2987	-0.4699	0.044	-0.2362	-0.0589	0.9862	-0.0306	0.5529	-0.5778	0.4457	-0.3585	-0.889	-0.5249	-0.2243	0.2203	-0.3364	0.1217	-0.2345	-0.6827	0.0215	-0.3383	0.123	0.7338	-0.152	-0.8186	0.2314	-0.0365	0.0215
BTBD14A	-0.281	-1.0679	-0.8997	-1	-1.0893	-0.9105	-1.3921	-1.1329	-0.9434	-0.811	-1.6574	-0.6326	-1.2863	-0.3419	-0.8468	-0.7155	-1.1047	-0.9828	-0.3808	-0.749	-0.8494	-0.0604	-1.1488	-1.255	-0.7809	-0.8836	-0.4779	-0.9105	-0.6643	-1.2828	-0.3771	0.3103	-1.7274	-1.685	-1.1779	-1.1078	-0.5002	-0.7202	-0.7859	-0.8084	-1.5023	-0.1811	-1.4901	-1.5522	-1.1016	-0.1001	0.3752	-0.1877	-0.6126
HUMBINDC	NA	NA	0	NA	-1.1649	0.315	0.269	0.7723	-0.4921	NA	0.0963	0.1545	NA	-0.9462	-1.1456	0.8584	NA	NA	NA	NA	NA	NA	0.6341	NA	0.4027	NA	0.7493	-0.8288	NA	-1	NA	NA	2.3727	0.4201	0.5782	0.9583	NA	-0.331	NA	-1.0087	-0.4639	-0.5187	NA	NA	0.2857	0.099	NA	-0.6804	NA
MGC42174	-0.8443	-0.2723	-0.8417	-0.3094	0.0745	-0.482	-0.5951	-0.191	-0.8339	-0.484	-0.1746	-0.4461	-0.4461	0.058	-0.6574	0.0272	-0.2916	-0.9914	-0.0831	-0.4286	-0.191	-0.2898	-0.3147	-0.1408	-1.0559	-0.3865	-1.1456	-0.5332	-0.5479	-0.0695	-0.5713	-0.8651	-0.1504	0.058	-0.5043	0.0594	-0.2863	0.0772	-0.2987	-0.4228	-0.456	-0.5951	-0.6038	-0.2311	-0.2092	0.384	-1.1943	-0.9105	-0.6643
VCY	-2.1779	-2.4901	-3.2379	-2.035	-2.0058	-2	-1.1811	-1.9379	-3.035	-3.2653	-1.6304	-2.2109	-2.2723	-1.0985	-1.221	0.0272	-2.7563	-1.071	-1.685	-3.0469	-2.7661	-2	-0.6967	-2.8783	-3.9368	-2.2793	-2.035	-2.9546	-1.7466	-2.8365	-2.0529	-2.8997	-3.2379	-2.7563	-2.2515	-2.8573	-1.8365	-0.771	-2.0233	-1.8625	-1.8573	-1.7226	-1.0985	-2.1016	-2.6529	-2.4982	-2.9771	-2.458	-2.6349
EXOC1	0.2786	-0.1943	0.0841	0.2546	0.5499	0.433	0.518	0.8726	-0.5886	0.4584	0.4699	-0.1552	0.7933	0.6397	0.8229	0.0058	-0.1078	0.4709	0.7093	0.8041	-0.1959	0.1712	0.4709	0.669	0.2975	0.8278	0.3494	0.4772	0.3242	0.1349	0.1738	0.9046	0.373	0.2786	0.6107	0.4276	0.058	0.3505	0.3907	0.4813	0.33	0.8883	0.542	0.3785	-0.0484	0.4027	0.6462	1.2123	0.86
TTTY13	1.5221	0.1322	0.513	-0.0306	1.0614	-0.144	-0.7466	-0.1094	0.1661	0.0043	0.7613	-0.0145	1.1609	0.3288	-0.454	0.5955	1.9653	0.3115	1.57	1.4125	NA	0.4404	1.373	0.9978	-1.304	0.3426	NA	0.0936	1.0022	0.3254	0.0058	-0.2142	-0.0058	0.9583	NA	NA	-0.699	-0.6016	0.2363	-0.1943	-0.417	-0.0755	-1.1361	0.7832	-0.1172	0.1878	NA	NA	-0.1031
KIRREL	0.2116	0.1852	1.3646	0.2179	-0.2863	0.4834	0.636	0.2666	-0.3255	-0.6104	0.5361	0.103	-0.0247	0.5291	0.6862	0.5479	-0.2159	-0.8034	1.2564	0.7958	0.0482	0.3254	0.2594	0.33	-0.3959	0.2339	-0.8314	0.1928	-0.8034	-0.2567	-0.0291	-0.3328	-0.0145	-0.6506	-0.0816	-0.7686	0.5878	0.2951	-0.2345	-0.0529	0.107	-0.144	0.3022	0.3437	-0.1297	-0.2987	-0.5374	0.3561	0.308
TM4SF20	-4.0023	-3.9839	-3.1976	-3.8762	-3.939	-3.9658	-4.5031	-4.3808	-4.3838	-4.357	-3.9954	-4.2515	-4.4328	-4.2905	-4.6295	0.3896	-3.6082	-4.2515	-3.81	-3.6118	-3.0589	-3.3076	-3.6785	-3.5995	-4.5162	-3.1844	-3.7427	-3.5395	-3.772	-4.6475	-3.2934	-3.0233	-2.3585	-3.4501	-2.9434	-4.8079	-3.7799	-4.4804	-2.8997	-4.0831	-4.4485	-4.0637	-3.3467	-3.4501	-3.814	-4.0954	-2.9214	-2.5479	-3.6915
SEMA4C	1.1512	0.9449	0.6862	1.2786	0.4977	0.6889	1.0208	0.1979	1.0144	1.2296	1.0731	1.3907	0.962	0.9935	0.251	0.0524	0.9523	0.7049	0.9092	1.7106	1.858	1.1097	2.4497	0.9986	0.5705	0.8375	0.0215	0.5945	1.4558	0.539	-0.1062	2.106	1.3774	0.5945	0.7849	1.5435	1.4303	0.7832	0.2041	0.3369	0.1257	0.5291	-0.0954	0.5489	1.3901	0.4005	1.0607	0.4404	0.0594
TRPM3	-0.2567	3.7115	-1.8783	0.2845	-0.2009	-0.6666	-0.1568	-0.6148	-1.3959	-0.6461	0.2376	-0.8288	-0.6038	-1.074	-0.1877	-0.0087	-0.2636	-1.5187	-1.8573	-0.486	0.0201	0.3918	-0.8417	-0.8135	-1.5864	-0.2898	-0.4501	1.3567	-1.3437	-0.3511	-0.4521	4.1867	-0.456	-1.8314	-0.2413	-0.7735	-1.0116	0.2054	-0.7934	-1.1234	-0.4266	-1.662	-1.4422	-0.1156	-0.4699	-1.7274	-0.2193	-0.7884	-1.1234
FALZ	0.0058	0.3785	1.1017	0.3391	0.5636	2.5886	0.6754	0.3663	0.3984	-0.4501	0.7891	0.0398	0.4678	0.2975	-0.0985	0.2116	0.8213	-0.5228	1.1388	0.3629	0.7049	0.0426	1.2259	-0.0262	0.3595	1.0043	0.2449	0.3334	-0.0574	0.2191	0.3022	-0.4719	1.2449	0.5558	0.4468	-0.1488	0.7596	0.636	0.9993	0.514	0.9077	0.696	1.4033	0.9568	-0.1976	0.9701	0.0827	0.5955	0.3127
PRY2	1.115	0.1388	NA	0.4447	0.9745	1.4589	-0.749	0.0538	0.2363	0.406	NA	0.7706	NA	3.3032	-0.7322	1.275	5.3089	-0.0439	NA	1.8938	0.6645	1.2904	0.9214	-0.7466	-0.1125	-0.456	NA	-0.2602	-0.2243	NA	-0.4659	-0.3456	0	NA	NA	0.2314	0.7163	1.6736	0.9978	-0.5995	-0.5564	-0.2042	-0.2969	-0.5416	0.451	-0.0862	0.5627	-1.1016	-0.1665
PHEX	1.0363	-0.8468	-2.482	0.4947	-1.8836	-0.3603	-2.0116	-2.1779	-1.3622	-1.2793	-3.5378	-1.5064	-0.1109	-1.3437	-1.662	-0.6416	-0.4481	-1.3696	-2.9105	-3.482	-0.6758	0.3346	-2.0116	-2.191	0.6192	-1.038	-0.1633	-1.5146	0.4573	-2.2934	2.8242	1.664	-1.7563	-1.7131	-0.4055	-1.2828	-0.6943	-2.5312	-1.5105	2.1868	-1.2277	1.5216	-2.1976	-1.8211	-1.7179	0.3437	-2.4189	0.7562	-1.2863
MBTPS2	-0.1187	0.3863	-0.881	-0.8314	0.7294	-0.454	-0.5973	-0.8757	-0.685	-0.6371	-0.3752	-0.0029	-1.152	-0.9828	-0.6416	-0.6735	-0.7274	0.4136	-0.6967	-1.0291	-1.077	-0.5479	-0.6416	-0.2636	-0.0679	-1.6439	0.0594	0.1137	-1.3076	-1.0087	0.0566	0.5965	-0.5002	-1.4461	-0.8135	-0.5332	-1.221	-1.9214	-0.1844	-0.0634	-0.2619	0.2485	0.24	-1.482	-0.3165	-1.1552	0.0676	0.1427	-0.1552
LDOC1	-1.3437	0.251	-0.3094	-1.0499	-0.8757	2.2063	-0.7834	-1.6259	-1.2009	-1.5105	-0.7809	-0.5416	-0.2987	-1.3659	-1.486	-1.0589	-0.8757	-1.7466	-1.5187	0.4531	-0.7084	-1.685	-1.8059	-0.1844	-1.0499	-2.4501	-3.5977	0.5049	-1.3921	-1.8836	-0.5973	-0.2294	-1.3183	-1.5312	-0.8997	-1.7322	-0.4461	0.0454	-1.5522	-1.4739	-1.9379	-0.4961	-2.1203	-0.6804	-0.9351	-1	-2.1779	-1.3511	-1.3364
SCML2	-2.6529	-2.6712	-2.2176	-1.9105	-1.2176	-0.9105	-2.6259	-1.5778	-2.071	-2.5735	-3	-1.9546	-1.8417	-3.5146	-2.3808	-1.5105	-2.0116	-2.7274	-2	-2.7274	-1.7322	-2.4035	-1.7661	-2.6171	-3.071	-1.4739	-2.0589	-2.1649	-4.2681	-2.8059	-0.889	-1.8573	-1.6574	-2.6349	-1.6126	-2.1016	-2.2515	-1.9105	-2.3147	-2.3585	-3.1844	-1.2277	-1.9771	-2.114	-2.7959	-1.7037	-1.8783	-1.6259	-2.662
SSX3	-0.2294	-0.5458	NA	0.6135	0.2916	-0.4364	0.2928	0.8115	NA	-0.6484	-0.0985	0.3403	NA	1.792	NA	0.6627	-0.8863	1.1693	-0.9214	NA	0.1699	1.1596	1.2981	NA	-0.6506	0.2726	0.1941	NA	0.6164	NA	1.2376	NA	0	0.0718	NA	-0.3603	0.2437	1.6337	0.2845	1.3144	NA	-0.6371	0.7433	0.1427	NA	0.8032	-0.6781	NA	NA
CCDC22	-0.5064	0.058	-0.6689	-0.527	-0.749	-1.0831	-1.114	-0.9078	-0.816	-0.5564	0.0314	-0.5756	-0.5416	-1.1392	-0.8262	-1.2379	-0.5649	-0.0649	-1.4779	-1.3884	-0.9159	-1.1943	-1.7466	-0.7859	-0.3566	-1.6712	-1.4189	-1.1681	-0.7686	-0.3346	-0.7859	-0.114	-0.6597	-1.1681	-0.9658	-0.8863	-0.3566	-1.6484	-0.7834	-1.0087	-0.9434	-1.191	-1.1488	-0.8863	-0.5332	-0.5735	-1.7131	-1.1456	-0.8546
GPKOW	-0.6643	-0.0101	-0.281	-0.0439	-0.3292	-0.6781	-0.6804	-0.5564	-0.364	-0.46	0.4967	0.1506	-0.255	-0.7984	-0.9856	-1.077	-0.1392	-0.2969	-1.0499	-0.1697	-1.0559	-0.5842	-0.4921	-0.5395	-0.1795	-1.5395	-0.4461	-1.0469	-0.2193	-0.173	-0.7686	-0.1877	-0.6082	-1.2723	-0.5649	-0.881	0.0129	-0.8186	-0.9406	-0.1714	-1.071	-0.8443	-1.1109	-0.3201	-0.4093	-0.3147	-1.1844	-0.816	-0.8186
UBQLN2	0.7111	0.8221	-0.1844	0.659	0.6182	0.1322	0.1003	0.1493	-0.662	0.0201	0.7075	-0.1844	-0.1746	-0.1094	0.4988	-0.5735	0.0129	0.3774	0.1916	0.2738	-0.6038	0.3346	-0.1959	-0.4305	-0.2362	-0.1047	0.4688	0.3369	0.294	-0.3566	0.7381	0.7916	0.0909	-0.8339	0.4308	-0.3022	-0.1078	-0.5291	-0.1681	-0.2243	0.5271	0.1763	0.0172	-0.5735	-0.3978	0.3752	0.54	0.3022	0.294
TBC1D8B	2.1084	2.9437	2.4263	2.0447	2.4217	1.2558	2.539	2.6341	0.7022	1.8856	2.4505	1.6201	3.0949	1.8367	2.1648	2.7801	1.5236	1.6799	2.9957	3.0887	2.1401	2.4995	2.4898	1.9538	1.6835	2.442	2.3649	3.9736	2.5003	1.0594	1.893	3.8866	2.3285	2.4052	2.3962	2.344	1.4772	1.9115	2.2209	1.6116	2.0388	2.8189	1.9222	2.1532	2.7424	1.6102	2.5986	2.6521	2.1811
TSPAN7	-2.482	-1.9942	-2.7179	-1.8009	-2.6082	-2.9105	-2.071	-1.4659	-1.3733	-0.2775	-2.035	-3.1976	-2.6259	-1.873	-1.6804	-2.3959	-0.9856	-2.6897	-2.7179	-2.2042	-2.9324	-1.8365	-3.1203	-0.9856	-0.1376	-2.5821	-2.1844	-2.2723	-1.077	-0.776	-3.0831	-3.1714	0.2253	-1.3808	-2	0.9351	-1.5606	-1.9159	-1.5312	-0.0801	-2.1714	-2.5064	-2.7179	-0.074	-1.6126	-1.9885	-3.8678	-1.5105	-2.458
POU3F4	-1.0589	-0.9324	0.4071	-1.5864	0.7966	-1.1811	-1.4461	-1.7037	-1.5606	-0.5166	-1.2688	-0.2379	-0.8009	-0.9771	-1.1297	-0.8288	-1.1584	-1.9105	-1.1424	-2.7179	0.545	-1.4074	-0.4521	-1.2345	-1.6804	-0.6215	-0.9518	-0.3094	-1.1297	-1.527	-1.0145	-2.2243	-1.9546	-1.9942	-1.4901	-0.0233	-0.811	-0.9241	0.0676	-1.1779	-0.6529	-0.816	-0.949	-1.5778	-1.5479	0.1349	1.5984	-2	-1.4779
RBBP7	-0.9406	-0.6371	-1.2688	-0.1125	0.4478	-0.5208	-0.816	-1.0954	-0.852	-1.1172	-0.9828	-0.2498	-0.191	-1.2515	-1.041	-1.3771	-0.9296	-0.462	-1.1746	-1.4266	-1.7084	-1.1266	-1.5023	-1.1392	-0.9351	-1.6304	-0.3147	-0.7884	-0.5951	-1.3076	-0.4699	-0.2362	-0.6439	-0.8443	-1.0116	-0.6735	-1.5735	-1.5395	-1.2413	-1.0801	-0.5864	-0.3076	-0.816	-1.1297	-0.8365	-1.1844	-1.4501	-0.4055	-0.9658
PRDX4	0.9328	1.125	0.4394	0.7058	0.5869	0.9107	0.4844	-0.2653	0.1622	0.3763	0.0426	0.4573	0.5271	0.7242	0.0101	-0.4208	0.4233	0.605	-0.274	-0.4266	-0.6082	1.1097	0.3741	-0.7298	0.9084	0.5351	0.8679	0.0552	0.91	-0.7466	2.2452	1.3202	-0.1234	-1.2109	-0.1408	-0.1943	-0.4659	-1.0233	0.2425	0.1003	0.315	0.7321	0.3254	-0.1001	0.119	-0.6371	-0.4501	0.6154	0.542
ASB11	-0.7686	NA	NA	NA	-1.2828	NA	NA	NA	NA	NA	-1.041	NA	NA	-0.3846	NA	NA	NA	NA	NA	NA	NA	NA	NA	NA	NA	NA	NA	-0.771	NA	-2.2934	NA	NA	-0.0014	NA	NA	NA	NA	NA	NA	NA	NA	NA	0.7155	NA	NA	NA	NA	NA	NA
PGRMC1	-0.9324	-0.1681	-0.454	-0.3111	0.2265	1.0697	-1.4779	-0.9406	0.2141	-0.0529	-0.4016	0.4988	-0.4364	-1.5907	-1.3548	-1.4901	0.0086	0.2314	-0.873	-0.7515	-0.7418	-0.7959	0.4027	0.9546	0.451	-0.6171	-0.3129	0.7242	-0.4442	-0.1877	-0.0277	0.5926	-0.3437	-0.6712	-1.074	-0.2026	-0.527	-0.1345	-0.2109	-0.6171	-0.5332	0.8718	-0.255	-0.3058	-0.6416	-0.9159	-0.2916	-0.6943	-0.8417
MCTS1	-0.5735	-0.2092	-0.8339	-0.3827	-0.4364	-1.0439	-0.9942	-1.1681	-1.5312	-0.9078	-0.2464	-0.5043	-0.6282	-1.2584	-0.8339	-1.8678	-1.5735	-0.2294	-0.9296	-0.4461	-1.3255	-1.0499	-0.8997	-0.749	-0.6416	-0.48	-0.4286	-0.077	-0.8546	-1.6394	0.4594	-0.0469	-1.1552	-1.255	-1.0087	-1.4901	-1.1617	-0.5458	-1.255	-1.0174	-0.8186	1.4834	-0.9828	-1.0469	-1.0203	-0.8339	-0.881	-0.4501	-0.5973
CXCR3	3.2827	3.0651	2.2872	2.818	2.601	2.332	3.3477	2.9681	1.9426	2.7403	2.9902	2.6425	3.1365	3.4289	2.9937	3.6588	1.419	2.7126	2.225	3.2875	2.5646	2.797	2.328	2.6211	1.9214	2.0759	2.34	1.5874	2.854	1.5089	1.766	1.0656	2.4631	1.8926	2.3423	2.1969	2.3377	1.7811	2.1976	2.3349	1.736	2.0714	2.4597	2.4182	2.5729	2.985	1.1953	2.2388	0.9434
P2RY4	-0.5756	0.3022	-0.3094	-0.3771	0.4489	0.3629	0.6772	0.1801	-1.3474	-0.8391	-0.0058	0.3829	0.224	0.3951	0.4319	1.7403	-1.4501	-1.1844	0.1322	0.2774	0.763	-0.0801	0.9046	-0.0649	-1.8365	0.3448	-1.3659	0.08	-1.0174	-0.7859	-0.2277	0.2041	0.0468	0.1941	0.3651	-0.7612	-0.0908	-0.255	-0.486	0.2774	-0.0247	-0.2602	-0.2193	-0.1993	-0.0847	-0.2515	-0.0649	0.2461	-0.4266
CDX4	NA	-0.5951	NA	NA	0.4125	0.281	-0.3585	NA	NA	-0.3273	-0.2969	NA	-0.6967	NA	0.099	NA	NA	-0.041	NA	-1.191	NA	NA	NA	NA	0.4158	NA	NA	NA	NA	-1.2793	-0.4305	NA	0	NA	NA	NA	NA	0.1375	NA	NA	-1.3255	NA	NA	NA	NA	0.1738	-1.4699	NA	NA
XAGE3	1.605	-0.071	0.9046	3.8369	2.2672	1.6239	3.7366	0.8592	1.0559	1.4859	4.7285	1.3505	2.489	1.517	2.127	0.8624	-0.077	0.1362	2.0264	1.1401	-0.462	0.7004	2.5878	1.7681	0.5907	-0.8678	0.6969	4.5741	2.0426	0.7181	1.1257	1.442	1.6521	2.3474	1.5898	3.5765	0.7545	4.1546	2.8436	0.583	2.1836	1.3578	3.1097	3.4686	4.5248	1.2412	2.7097	2.6034	0.7765
NXF5	-3.6657	-3.0831	-3.9368	-3.6153	-3.2653	-3.3614	-2.9885	-3.2109	-3.5479	-2.5312	-3.0831	-3.5855	-3.4066	-3.2243	-3.035	-2.8783	-4.028	-3.402	-2.7466	-4.0398	-3.4005	-3.7939	-2.9214	-2.8262	-2.4739	-3.5479	-3.8181	-3.4282	-3.4266	-3.3718	-3.2934	-3.5362	-3.4158	-3.6584	-2.5995	-3.5855	-3.035	-3.2934	-3.2515	-3.5977	-3.589	-2.5479	-3.8614	-3.422	-3.6367	-3.3853	-3.7505	-3.5412	-3.5683
MECP2	-0.2916	0.3829	-1.0087	0.0976	0.2892	-0.1536	-0.0877	0.0286	-0.7155	-0.071	1.5602	0.2253	-0.2863	0.3208	0.157	0.0342	-0.3201	0.5926	0.1137	0.2916	0.0454	0.0257	-0.191	0.8032	-0.0395	-1.3437	-0.3696	0.2714	0.281	-0.0365	-0.5713	0.8891	-0.5842	-0.1697	-0.3201	-0.0695	0.2041	0.9877	-0.5543	0.4351	0.4125	-0.2951	-0.6349	-0.0695	-0.2987	-0.364	-1.1047	-0.364	-0.5907
OPN1LW	0.1878	0.3907	0.6889	-0.2934	0.6182	0.543	-0.0985	0.373	-0.1633	-0.6038	0.3403	0.8392	-0.0321	0.0895	0.3674	0.9862	-0.4442	0.1596	0.4678	-0.0203	0.8213	-0.3111	1.6512	0.3863	-0.4982	0.7066	0.3231	0.4626	-0.1943	0.6079	0.175	0.1043	1.3657	1.0731	0.474	0.3674	0.4834	0.6627	0.0342	0.3696	0.2916	0.1738	0.4895	-0.1234	0.4489	0.3208	0.451	0.9275	0.1467
STK23	-1.2109	-1.1424	-0.4739	-0.4016	-0.963	-0.5249	-1.0831	-1.1617	-2.8468	-1.8059	-1.3401	-0.9602	-0.0619	-0.9105	-0.6804	0.3288	-1.0116	-0.7466	-1.152	-1.2793	-0.2533	-1.0233	0.3414	-0.2916	-1.6304	-0.1187	-1.662	-0.9351	-1.415	-1.9546	-1.0801	-0.6897	-0.8836	-0.749	-1.737	-0.6643	-0.685	-0.5886	-0.5628	-0.6016	-1.038	-0.2498	-1.1078	-1.4305	-0.1861	-0.7179	-0.2987	-0.3978	-0.6038
MORF4L2	-0.7108	-0.1156	-0.706	-0.6126	-0.456	-0.5799	-0.8314	-0.8009	-0.4521	-0.2193	-0.7909	-0.2092	-0.5756	-1.0831	-0.9942	-0.8443	0.0215	-0.699	-1.255	-0.5395	-1.4112	-0.4228	-0.7037	-1.0469	-0.173	-0.5023	-0.9546	0.1814	-0.9518	-1.1329	0.2302	-0.1795	-0.7637	-0.8468	-0.7394	-0.737	-0.8365	-0.8443	-0.5522	-0.0336	-0.1894	-0.2294	-0.5023	-0.4093	-0.417	-0.016	-0.5084	0.1827	-0.486
LONRF3	-0.1361	0.8007	0.0552	-0.3292	0.2129	1.4303	0.1017	0.4573	-0.1424	0.1852	0.9313	-0.2176	0.0621	0.6942	1.0949	1.2534	-0.4941	-0.3419	0.5955	1.0454	0.2857	0.3288	1.1616	0.9237	0.2762	0.4542	-0.173	1.2714	-0.9024	-0.3022	0.6313	0.8584	0.0538	1.2792	0.3369	0.2798	0.4436	1.6415	0.1057	-0.0336	0.5558	0.2203	0.5743	0.513	1.0468	-0.0484	0.517	0.2857	-0.0043
RGN	3.61	3.8074	3.1212	4.033	3.669	-0.9828	2.2231	3.4168	1.6425	3.5185	4.4182	-0.2828	2.5077	1.5622	3.4383	0.111	3.1862	-0.016	3.4555	2.8754	1.9775	2.7951	3.6837	4.3875	2.3929	0.8464	2.6652	2.8775	3.4529	3.2678	1.2612	2.9224	3.2394	2.8301	4.3632	3.9727	1.9657	3.05	3.3992	2.3077	2.6007	1.9949	3.6826	3.3099	2.9535	2.7889	3.3199	1.4362	3.2268
MAGEE1	-1.1361	-0.458	-1.0203	-1.1649	-0.152	-1.2969	-0.5951	-1.304	-1.5735	-1.3219	0.1137	-1.7563	-1.2934	-0.9379	-0.771	-1.0893	-0.8651	-1.9828	-0.1219	-0.706	-1.1976	-0.8314	-1.2969	-0.8468	-1.191	-0.6215	-1.3585	0.1401	-1.2009	-1.7274	-0.8783	-1.5479	-0.0786	-0.5778	-0.454	-0.3328	-0.0514	-0.2076	-0.5043	-1.1617	-0.2828	-0.5437	-1.0029	-0.4679	-0.3884	-0.6666	-1.0116	-0.7131	-0.3715
TBL1Y	-0.4055	0.2216	-0.4383	-0.2294	0.5675	0.516	0.3951	-0.7418	-0.0619	-0.8704	-0.4112	0.513	-0.3474	0.5926	-0.3622	0.4297	-0.2671	0.7949	0.144	0.3561	-0.9406	1.109	0.5331	-1.699	-0.2498	0.2129	0.7066	-0.949	-0.3383	-0.8034	-0.4699	-0.0087	-0.9324	-2.4422	-0.2706	-1.949	-0.8836	-0.191	0.2179	-0.9971	-0.5395	-0.4189	-0.0233	-0.7834	0.3606	-1.0029	-0.3677	-0.2328	-0.4403
PAPD1	-0.725	-0.7037	-0.6104	-0.4461	-1.0559	-0.5125	-0.5064	-0.8339	-0.6237	-0.9971	-1.1424	-0.6215	-1.3884	-0.8211	-0.9714	0.0398	-0.6574	-0.1488	-0.4055	-0.5995	-0.9971	-0.5692	0.8592	-0.9269	0.0759	-0.4941	0.8536	-0.8034	-0.4035	-0.6171	0.622	-0.8443	-0.9856	-1.4228	-1.4461	-0.8288	-0.9856	-0.9187	-0.6259	-0.8211	-0.5437	-0.1094	-1.1844	-0.8391	-1.0262	-0.7274	0.184	-0.9546	-0.462
PCNXL2	NA	NA	NA	NA	NA	NA	0.3414	NA	NA	NA	NA	NA	NA	0.9054	NA	NA	NA	NA	NA	NA	NA	NA	-1.458	NA	NA	NA	NA	NA	NA	NA	NA	NA	-0.0072	NA	NA	-0.3978	0.6799	NA	NA	NA	NA	NA	NA	NA	NA	NA	NA	NA	NA
SPRR2G	-0.8034	-0.5187	0.433	-0.0087	-0.8211	-0.3789	-1.3959	-0.7037	0.1865	0.0058	-1.8836	0.4222	-0.5929	-2.0893	-1.114	-1.1016	-1.1361	-0.3419	-1.811	-2.0649	-0.889	0.4926	-2.5146	-1.6712	-0.2311	1.0447	-1.0923	-0.8494	-1.458	-2.0291	0.2004	-0.1266	-0.0014	NA	-1.3111	-1.3548	-1.0831	-1.0831	0.2016	-0.4131	0.5617	-1.1424	-0.0043	-0.4208	-0.0087	0.0718	NA	0.2738	-1.4941
Kua-UEV	0.0398	-0.5125	-0.0604	0.0607	0.3242	-0.6349	0.6544	-0.1424	-0.7274	-1.4699	-0.2277	0.2904	-0.5735	0.1177	-0.4461	0.1467	-0.4759	0.5666	0.546	0.7672	-0.5395	-0.3677	-0.114	-1.1552	0.0342	-0.5125	1.1763	0.0398	0.0144	-0.364	1.1551	-0.6967	-0.0816	-1.3111	-0.5084	-1.2828	-0.364	0.0129	-0.1877	-0.4739	-0.7909	-0.3622	-1.114	-0.7588	-0.0604	-0.9187	0.4967	-0.2602	0.037
ANKRD13C	0.115	0.0144	0.516	0.433	1.0779	0.546	0.7225	0.0976	-0.0847	0.9605	0.0976	0.3115	0.111	0.2388	0.5578	0.1801	0.2928	0.3763	0.8172	1.1654	0.8189	0.7216	1.1395	0.451	0.8049	1.6192	0.9738	0.636	0.7647	-0.5023	1.1928	1.4463	0.516	0.2497	1.5326	0.7941	0.2975	-0.0101	0.6239	0.9275	0.512	0.4478	0.0949	-0.2619	0.4647	0.5993	1.7592	1.3912	1.2612
SERPINC1	2.2895	-1.3884	NA	NA	0.6079	NA	0.5907	0.8624	0.1801	1.5602	0.0976	NA	0.8392	-0.2916	0.2041	-0.0514	NA	NA	0.6799	-1.6304	2.518	4.2943	NA	0.0058	0.4297	NA	0.1878	NA	1.3494	0.4552	NA	2.7183	-0.0233	NA	NA	NA	NA	0.0398	0.0043	-1.5522	1.3857	NA	0.5821	NA	1.6452	NA	-0.0484	1.8667	-2.3808
RP5-1077B9.4	-0.5291	-1.0801	-0.7346	-0.7155	-1.3696	-1.041	-0.6259	-1.114	-0.6394	-1.035	-0.7984	-0.6873	-0.737	-0.9024	-0.8009	-0.226	-0.5064	-0.8262	-1.3292	-1.0619	-0.8135	-0.8009	-0.9434	-0.7274	-1.0679	-1.811	-1.8211	-1.2969	-0.9686	-0.8863	-1.5907	-1.3183	-0.706	-0.5606	-1.2176	-0.8288	-0.5756	-1.2481	-0.8391	-0.8836	-1.2688	-1.6439	-1.3401	0.5251	-0.5002	-0.5778	-1.9379	-1.5649	-1.458
HDAC1	-1.221	-0.7539	-0.5929	-0.7155	-1.1234	-1.486	-0.9971	-0.454	0.184	-1.1329	-1.6304	-0.304	-0.5886	-1.0923	-1.5437	0.0841	-0.9214	-0.7686	-1.3111	-1.4982	-1.0985	-1.3328	-0.6326	-0.8997	-0.8262	-1.3622	-1.041	-1.7131	-0.8314	-0.4131	-1.482	-0.394	-1.6215	-1.1617	-1.2584	-0.5437	-1.1109	-1.114	-1.486	-1.1361	-1.2793	-0.3622	-1.1976	-0.3846	-0.46	0.0976	-1.2863	-0.9942	-1.5951
CRYZ	-0.9828	-0.9714	0.2845	-0.5735	1.545	-1.2515	-0.0174	0.9146	0.6717	0.3185	1.0036	-0.3474	0.1043	-0.5606	-0.0514	-1.4779	-0.3111	-1.6259	-0.5208	0.4823	-0.2723	-0.771	-0.484	1.1322	0.5724	-0.1345	0.8098	1.216	-0.3511	0.84	-0.394	0.4457	1.2473	1.4054	0.4657	0.7553	-0.606	-0.3529	1.0293	1.266	-0.9078	-0.4941	0.9964	0.3994	0.0976	0.1674	1.5719	0.5231	-0.4719
ARHGEF16	-0.2226	0.1801	0.4212	1.6581	0.8695	0.9613	0.8007	1.5719	1.111	-0.2498	0.0412	0.9731	0.6276	0.4792	-0.6666	1.7281	0.1124	-0.606	0.1763	0.1648	1.2839	1.0614	0.1217	0.1257	0.4016	0.0538	-0.9379	0.175	0.275	1.389	-0.6461	0.9313	0.115	1.2552	0.1776	0.406	0.0813	0.585	1.206	1.1263	-0.3076	0.4895	0.6951	1.1654	1.175	0.6107	-0.0203	0.5955	0.1814
DDEFL1	0.2104	0.0229	0.669	1.0868	-0.5208	0.419	0.4834	0.3482	1.5105	0.3528	0.3807	0.6079	0.7467	0.0014	0.0356	-0.1001	1.4141	0.3874	-0.1633	0.4071	1.211	-0.097	-0.881	0.184	0.6853	-0.897	-0.4189	-0.3733	0.8852	0.3448	-1.3771	1.6074	0.3896	0.8164	-0.7274	1.0559	-0.1552	-0.2009	-0.0954	0.294	-0.6304	-0.8314	0.1674	0.5705	0.9516	-0.4501	-0.3273	-0.458	-0.484
H6PD	0.5926	0.4977	0.1124	0.7933	0.3774	1.3651	0.726	0.8221	0.1953	0.189	0.8424	0.7066	0.5936	0.7883	0.8821	1.856	0.3334	0.3885	0.2963	0.679	0.4977	0.373	1.0868	0.6517	0.3951	0.8375	-0.1861	0.6978	0.2916	0.0243	-0.3733	0.3685	0.3403	0.8774	0.4436	0.688	0.5936	0.8844	0.4201	0.9811	0.2987	0.5607	0.6201	0.8552	1	0.9862	0.0731	0.6799	0.4049
CYP4B1	4.9928	8.0688	5.6887	1.9553	7.4886	-1.0893	5.6314	5.746	6.3003	5.0777	8.4107	0.7004	4.3291	4.7126	7.9189	-1.1649	6.9212	5.4532	5.1379	7.7846	6.5081	8.2593	0.1878	8.5721	6.0951	-0.097	4.5053	5.4476	6.2248	7.1849	4.0426	8.6833	8.0373	7.2873	8.9033	8.4713	6.2553	6.5273	6.6199	0.9007	8.5341	5.849	8.9009	8.4017	6.879	4.9588	4.04	7.0112	7.2288
KCNJ10	0.1596	-0.0101	0.8278	0.1493	-0.2294	0.4158	1.5854	0.6906	-0.7155	0.7058	-0.0514	1.3431	0.6257	0.0158	0.5509	1.3685	0.606	2.0086	1.7247	0.1217	0.6745	0.4605	1.5013	0.3403	NA	0.6201	0.419	0.3606	0.6636	-0.5395	1.025	0.1309	NA	0.1243	1.315	0.4926	0.7407	0.8115	0.9819	0.474	0.8335	-0.041	-0.2447	0.45	0.8131	0.0058	0.3528	-0.4921	0.7782
CFHR1	3.7377	4.717	4.0951	5.2698	2.0458	4.0418	3.7236	3.5656	4.1961	4.4822	3.7761	4.5747	2.9707	3.4383	3.6462	2.8691	3.2126	4.1169	4.0126	5.8146	4.5686	4.8997	0.4782	2.9435	3.162	4.4429	3.5644	4.2578	4.8063	2.6434	3.5838	1.544	3.1982	2.2363	3.9819	3.6679	4.0781	5.114	3.2066	3.7506	3.8972	4.3785	3.8856	3.9782	3.479	4.6053	3.5008	5.2657	4.7719
PMVK	-0.3548	0.2191	0.6098	0.1763	1.0186	0.7774	-0.0862	0.9877	0.9605	0.6745	0.5539	0.5049	-0.1681	0.2104	-0.0321	0.1283	0.539	-0.2447	1.319	0.0101	0.1776	0.3369	0.0243	1.4859	0.257	-0.2881	-0.6897	0.9343	-0.2828	0.7891	-0.2092	0.1043	0.315	-0.1633	0.111	0.6508	0.24	1.0875	0.157	0.7485	0.4158	0.1763	0.4605	0.606	0.4457	0.3618	0.8805	0.1953	-0.2987
PARP1	-1.3659	-1.3147	-0.2026	-0.2688	-0.5002	0.0786	-0.9518	-1.3696	-0.6897	-0.7515	-1.4461	-0.2464	-1.1078	-1.0499	-1.4112	-0.7394	-1.811	-0.1552	-0.771	-1.2243	-1.3548	-0.816	-0.5416	-0.9351	-0.6349	-0.6643	-0.3846	-1.1681	-0.1649	-1.6126	-0.8943	-1.0801	-1.4461	-1.3808	-0.9658	-0.6735	-0.9324	0.0731	-1.811	-1.0058	-0.4208	-0.5821	-1.255	-1.2009	-0.8997	-0.5064	-0.2969	-0.8573	-1.074
MECR	-1.1746	-0.9714	-1.2076	-1.2277	-1.662	-1.462	-1.5353	-1.4501	-0.9132	-1.5735	-1.4422	-1.3219	-1.2723	-1.486	-1.5735	-1.2277	-0.8916	-0.8009	-1.3997	-1.5735	-0.8084	-1.2042	-1.4266	-1.0619	-1.0529	-1.7322	-2.2653	-1.889	-1.7274	-1.3548	-1.5907	-0.9771	-0.897	-1.1746	-1.6215	-1.4383	-1.2311	-1.1811	-1.2515	-1.5064	-1.6394	-1.4383	-1.737	-0.3328	-0.9296	0.099	-2.1203	-1.7131	-2.041
RHOU	1.6257	1.6853	2.7772	1.8164	2.4425	-0.3292	0.5039	1.5922	3.1525	0.8828	0.5558	1.8456	2.294	1.2339	0.7329	-0.1877	0.9123	1.1551	0.9642	0.9404	1.1467	1.6595	2.2684	0.4049	0.6717	-0.4112	2.6902	0.3918	2.1276	1.4972	1.1023	2.2884	0.9942	1.6017	0.9471	2.5117	1.5023	2.7954	0.5753	0.1941	0.0342	0.5763	0.992	1.605	1.7799	1.1871	4.5217	1.412	0.7277
MRPS15	-0.7735	-0.7661	-0.3789	-0.5735	-0.1536	0.3763	-0.5353	-1.1392	-0.0189	-0.9105	-0.8573	0.0538	-0.4035	-0.1536	-0.7612	-0.5312	-0.2142	0.1763	-0.2396	-0.7346	0.8432	-0.6827	1.2863	-1.0116	-0.3622	0.1725	0.1725	-0.4344	-0.5756	-1.074	-0.3677	-0.6529	-0.486	0.0229	-0.5479	-0.3846	-0.5416	-0.5585	-0.7515	-0.3328	-0.2584	0.0342	0.3045	-0.2345	-0.2092	-0.2636	0.6003	-0.2881	-0.6416
FHL3	0.4626	-0.5291	0.0243	0.0635	-1.2076	0.4521	-0.2481	-0.6873	0.4957	-0.8237	-0.2533	-0.0847	-0.488	0.2129	0.037	-0.6282	0.2594	-1.035	-0.6529	0.0468	0.1903	0.6388	0.3437	-0.484	-0.1203	-0.3997	-1.7226	-0.4779	-0.6304	-0.5649	-1.0145	-1.3219	0.0976	-0.7013	-1.1779	-0.8339	0.8213	-1.5187	-1.3292	-0.6016	-0.9771	-0.7131	-0.9024	-0.4403	-0.0454	-0.5395	-1.5564	-0.6758	-0.8009
PLA2G2E	0.4895	0.7286	0.3033	NA	NA	NA	0.0868	1.0731	0.4751	0.4425	1.6503	NA	0.545	1.8584	1.1635	1.278	NA	0.346	0.7849	NA	NA	0.4709	NA	-0.0589	NA	NA	NA	1.3718	-2.9214	1.1859	NA	NA	0.0101	NA	0.9479	1.514	0.5627	1.4297	NA	1.0165	1.0807	NA	0.294	NA	NA	NA	NA	NA	0.8528
ANGPTL7	NA	NA	NA	0.08	NA	NA	NA	NA	NA	2.2919	NA	NA	NA	NA	0.4678	NA	1.2945	NA	NA	0.6388	NA	NA	NA	2.2415	NA	0.7553	NA	0.3138	NA	NA	NA	NA	-0.0233	NA	1.4436	0.2425	NA	NA	0.0201	NA	0.2461	NA	NA	NA	NA	NA	NA	NA	0.6304
HOOK1	-1.1329	0.0243	0.3482	0.4082	0.8156	0.6581	0.2678	-0.5821	0.2104	-1.3111	0.4468	0.4158	0.1003	-0.2916	-1.0985	-0.2126	-0.5649	1.4579	0.2265	-0.4699	2.0803	-0.2481	0.3606	-0.2142	0.1084	0.4668	0.3242	0.8671	-0.097	-1.3884	0.6434	0.5926	0.5578	1.0503	-0.4779	1.7251	-0.2176	-0.4521	0.9935	-0.462	0.148	0.3448	0.2606	0.2437	0.3584	-0.7588	0.2203	0.0936	-0.2076
FMOD	4.2795	2.9417	4.0583	3.8748	3.3827	3.302	3.9269	3.8146	3.3964	3.9126	4.1432	3.5789	3.7634	4.0875	4.0444	3.853	3.7159	2.8365	4.3277	4.0108	1.7904	4.9189	1.8726	3.3923	3.2029	4.5934	2.6658	2.8049	3.8043	3.8349	3.7004	2.1641	3.3004	2.8895	4.0815	3.8875	4.4607	3.4128	2.8544	3.1641	3.373	4.0126	3.8237	4.047	4.5503	2.2741	3.6381	3.9791	4.4705
HSPA6	3.1876	2.9859	3.342	3.99	2.0583	3.0723	4.4189	2.7727	3.011	2.6192	2.9893	2.8926	4.2095	3.5729	4.4323	2.9895	3.5644	3.0356	2.7763	3.4647	3.4222	2.9254	3.6064	3.5957	3.0878	2.5683	2.4041	2.4217	3.3561	3.0472	3.3799	2.7801	4.0721	3.5656	3.2578	2.7055	3.479	2.9201	3.1127	3.5021	3.4489	2.6166	2.5089	2.6681	3.0659	3.5273	3.1805	4.4951	3.6241
BRP44	-0.5353	-0.5228	0.7294	-0.1001	0.538	-0.3364	-0.6967	0.5499	0.4626	-0.1861	-0.7179	-0.2447	0.1349	-1.1649	-0.5084	-0.5778	-0.0786	0.8961	-1.1456	-1.0058	-0.9159	-0.4481	-1.7859	0.6229	0.0257	-0.2775	0.0129	0.0813	-0.0514	-0.077	-0.2758	-0.041	-0.5842	-0.484	-0.2328	-0.3456	-0.3219	0.2522	-0.1456	0.5039	0.0058	-0.0801	0.2363	0.103	0.2845	-0.0321	-0.1568	0.4647	-0.0425
MAEL	NA	NA	0.6799	NA	NA	1.7698	NA	NA	1.9949	NA	NA	NA	NA	0.2798	0.0342	0.6443	NA	NA	NA	0.6248	NA	NA	NA	0.518	0.1467	NA	NA	1.037	-3.0954	NA	NA	NA	-0.0174	NA	-0.0262	0.2041	0.8156	NA	NA	0.6699	NA	NA	1.4834	1.0745	NA	NA	NA	NA	NA
RGS2	0.6924	0.8375	1.8028	1.8152	1.6681	-0.4639	0.8953	1.1329	0.9237	2.4263	1.5039	0.9508	1.1985	2.1709	1.6826	-0.662	1.5211	-0.1536	0.0412	0.5705	0.434	1.7753	0.9942	1.5553	0.3763	1.7277	2.0405	1.1395	2.2931	0.474	1.2041	1.0412	0.7233	0.9833	2.842	1.6503	2.175	1.7455	2.0325	1.474	0.3161	0.7146	1.326	0.959	1.0029	-0.0189	1.6012	1.2654	2.3254
TMEM9	-0.5228	-0.2059	0.8448	0.0172	0.9523	0.1467	-0.1568	-0.1665	0.5705	0.0496	-0.2126	-0.0439	-0.6371	-0.3715	-0.7179	-0.5208	0.0029	-0.5043	0.4594	-0.4941	0.0342	0.52	0.6526	0.1966	-0.013	-0.3183	-0.0544	0.308	-0.3292	-0.2126	-0.0058	0.8335	0.4906	-0.1552	-0.1665	0.7536	-0.0985	0.1177	-0.5479	-1.3884	-0.0634	-0.5543	-0.4055	-0.0233	0.3707	0.051	-0.0291	0.3254	-0.3273
PTGFRN	0.281	-0.7612	0.827	0.8254	0.2786	1.3403	-0.16	0.0115	0.275	-0.3529	-0.3147	2.0969	0.3918	-0.7809	0.0468	0.2016	0.5049	-0.4112	-0.0877	-0.1536	-0.0029	0.6369	1.5445	-0.6016	0.9007	0.0482	-0.9743	0.3863	-0.3004	-0.013	1.6758	1.1164	0.0621	-0.5023	-0.9462	-0.013	0.6745	-1.0985	-0.6552	-0.1877	0.1467	0.4319	-0.1392	-0.7394	0.45	0.1164	0.0454	0.704	0.1217
TRIM63	2.9769	2.3188	2.2305	1.5175	0.0949	0.6369	4.504	5.09	3.7159	5.4822	2.8811	NA	1.5998	1.1467	6.2591	6.1773	3.5668	0.1217	3.0881	4.1691	3.0812	0.2079	1.0531	3.263	5.3241	1.3984	0.9358	3.2095	3.017	3.1659	2.0183	0.0086	3.3854	3.0514	4.7404	4.1416	5.0896	3.903	3.5534	0.5211	0.9775	1.8102	6.0148	3.7897	3.1359	1.0545	3.2434	2.5658	3.0724
ADAMTSL4	0.2449	-0.5778	-0.6781	-0.8625	-0.2243	-1.7809	-1.737	-0.5973	-1.0291	0.0936	-0.7661	-1.4305	-1.527	-0.8135	1.1935	-2.035	0.3208	-0.7934	0.7268	0.0963	-1.4305	-0.7155	-1.454	0.6135	-1.0679	-1.9324	-1.0893	-0.6126	-0.8836	-1.2345	0.0976	-2.1016	-0.2793	-0.462	-0.606	0.3242	-0.6484	-1.0145	-1.1297	-0.8704	-0.811	-1.7037	-1.3548	-0.7108	-0.144	-1.6349	-3.0831	-0.458	0.7899
ACTN2	-2.6349	-1.6394	-2.5146	-1.1078	-2.041	-2.6259	-0.4228	0.5281	-2.0058	1.6645	-1.1297	-2.4266	-0.4344	-1.8678	-0.3622	-2.889	-1.4112	-2.2793	-2.3219	-1.1617	-0.5886	-1.889	-1.816	-0.0831	-1.3328	-1.7466	-1.3004	-1.6439	0.2666	-0.4074	-2.3585	-2.1016	-1.0145	-2.737	1.8691	-0.4501	-1.1617	-0.2092	-1.1811	-3.3884	-2.737	-3.2793	-0.6712	-0.685	0.5069	-3.1844	-1.9885	0.2702	-1.0116
TMEM125	2.7555	4.2196	3.5668	3.0463	5.151	2.9003	4.1522	3.7835	3.9392	4.1946	4.7719	2.8879	3.466	3.1077	3.5934	3.5546	3.6288	4.0618	3.9644	3.2884	5.3663	3.6171	2.7491	4.845	3.9653	2.3351	3.0379	5.4941	2.989	3.8924	1.6622	4.7538	4.7955	5.076	3.8217	5.8199	2.4675	3.9495	4.1546	2.0528	4.0925	2.8088	4.5311	4.8684	5.0725	2.2138	3.4647	3.0599	2.7515
IPO13	-0.6148	-0.7155	-0.9828	-1.0954	-0.9743	-0.4266	-1.2176	-1.3183	-0.5778	-1.3511	-0.963	-0.5084	-0.8468	-1.3328	-0.9971	-0.9574	-0.4921	-0.304	-1.4501	-1.4383	0.2642	-0.8135	-0.8943	-1.1584	-1.0499	-1.8573	-1.8365	-1.2243	-0.9602	-0.8757	-1.6666	-0.949	-0.7959	-0.4442	-1.2379	-0.3022	-0.1552	-1.0262	-1.1361	-1.0619	-1.6804	-0.8651	-1.0862	-0.4941	-0.2345	-0.1329	-1.8417	-1.2009	-1.8783
EIF2B3	-1.2042	-0.5929	-0.7442	-0.8468	-1.0499	-1.3474	-1.0589	-1.3997	-0.3456	-1.2863	-1.0893	-1.3328	-1.4228	-1.5692	-1.5312	-1.6171	-1.074	-0.7394	-0.7394	-1.4112	0.2437	-1.0499	-0.8599	-1.5105	-0.7346	-1.221	-0.816	-1.3659	-0.4941	-1.2009	-0.0014	-0.5353	-0.6804	-0.9885	-1.6215	-1.3771	-1.3401	-1.527	-1.1047	-2.191	-1.2481	-1.2176	-2.071	-1.3622	-1.1297	-1.4659	-1.1361	-0.9799	-1.3401
RIT1	-0.2464	-0.4442	0.6164	-0.415	1.2461	-0.5043	-0.4074	-0.692	0.3208	0.0172	-0.5249	-0.226	-0.3789	-0.6873	0.0356	-1.1779	0.4158	-0.7322	-0.2619	-0.6259	-0.077	-0.4403	-0.2845	0.7596	0.103	0.4636	-0.7037	0.2351	-0.1926	-0.2533	-0.4521	-0.071	-0.3959	-0.2379	-1.3328	0.5261	-0.255	0.4688	-0.2277	1.7225	-0.1266	-0.0908	0.051	-0.0454	-0.1811	0.148	0.2714	0.308	-0.2076
CRABP2	2.5724	2.2194	3.0027	3.342	2.0621	1.7837	1.5346	-1.5395	2.051	1.9535	3.1155	2.9151	2.3768	2.0673	1.545	1.6781	-0.8365	1.7437	3.4529	1.622	2.2412	0.9568	3.3434	1.745	2.2534	2.8092	3.3448	3.5323	1.5366	-1.2447	1.389	1.9377	2.0036	-1.255	0.2702	0.2534	2.3516	3.5765	2.5624	-1.482	2.2771	3.0569	-1.699	2.6617	2.3553	2.313	2.6864	2.1574	1.8359
ZZZ3	-0.9686	-1.6666	-0.7588	-0.7959	-0.3603	-0.1203	-0.7735	-0.897	-0.6758	-0.6597	-0.7834	-0.852	-1.3548	-0.8836	-0.1568	-1.458	-0.9686	0.1243	-0.4679	-0.2793	-1.1329	-1.304	-0.7131	-1.041	0.1097	-0.0559	0.9782	-0.304	-0.1313	-0.5585	-0.2934	0.2642	-0.7637	-0.1172	-0.5522	-0.889	-0.9828	-1.5105	-0.2176	-1.1488	-0.0058	-1.077	-0.2277	-1.4982	-1.1714	-0.6215	0.3346	-0.2447	-0.3511
RAB25	1.569	1.2904	2.4284	1.281	1.9613	2.3039	0.7373	2.5221	2.426	1.4668	1.4699	1.8922	1.4244	1.4195	0.2774	2.6299	2.2678	1.9184	1.6686	0.3471	1.583	2.1824	1.7394	2.6686	1.4584	1.1757	2.3945	2.3431	1.6159	2.6697	-2.6529	1.433	2.3083	1.8821	0.6211	2.3283	1.54	1.6107	2.4911	2.0065	1.9605	1.3173	0.8938	1.7664	2.5497	2.0528	2.7619	1.08	0.3829
C1orf144	0.4906	0.3231	0.2774	0.5211	0.6754	0.4605	0.3885	0.4626	0.3718	0.0144	0.1427	0.5588	0.0029	0.3426	0.4647	0.1532	0.0524	0.6088	-0.1094	0.1375	0.3403	0.406	0.2154	0.3606	0.1738	0.2534	0.3595	0.3426	0.301	-0.3219	0.2412	0.6415	0.2928	-0.2653	0.4947	-0.1828	0.175	-0.0649	0.4489	0.5597	0.4415	0.5361	0.5993	1.3448	0.3852	0.91	-0.3884	0.5099	0.8041
BMP8A	-0.1488	-0.2602	-0.1633	0.0144	0.1738	-0.0262	0.0868	0.2154	-0.4112	-0.4208	-0.2602	0.1204	0.099	0.2376	0.2191	0.1941	-0.3219	-0.6371	-0.152	0.2104	0.051	0.0718	-0.0439	-0.2396	-1.1047	-0.0514	-0.8573	-0.1203	-0.3255	-0.3511	-0.0939	-0.0218	-0.2447	-0.2193	-0.0247	-0.4679	0.1686	-0.0029	-0.46	-0.0425	-0.3603	-0.0847	-0.1408	0.0186	-0.0954	-0.1681	-0.749	0.2129	-0.2845
TRIM11	-0.7226	-0.6126	0.3874	0.0676	-0.6394	0.5321	-0.7346	-0.1219	-0.0679	-0.4699	-0.897	-0.0801	-0.3201	-0.5951	-0.8651	0.7093	-0.4266	-0.077	-1.0529	-1.0262	0.2821	-0.1488	-0.3165	-0.48	-0.6439	-0.9462	-1.5437	-0.6897	-0.5606	-0.0233	-1.6897	-0.4325	-0.7298	0.0663	-0.6349	-0.3696	-0.394	-0.2009	-1.2969	0.0704	-0.6126	-0.8651	-1.2277	-0.771	0.2141	-0.2226	-0.2076	-1.1047	-1.304
HBXIP	0.0524	-0.4679	0.3807	0.3863	0.4255	-0.456	0.4615	0.7294	-0.2881	0.6369	0.7242	0.0895	0.3829	-0.1877	0.2079	-1.2515	0.5936	0.373	-0.5125	0.0881	0.1493	0.119	0.0922	0.6079	0.1776	0.5734	0.852	0.9252	0.308	0.6145	0.0314	0.8123	0.6173	0.5079	0.1903	0.1979	-0.1266	-0.6735	0.7765	0.6267	0.6031	-0.144	0.1865	-0.2311	0.2558	0.2833	0.2916	0.5993	0.3057
WDR77	-1.873	-1.8997	-1.4941	-1.3111	-0.9024	-1.5479	-1.5951	-1.3147	-2.1714	-1.737	-1.4344	-1.4739	-1.6484	-2.0116	-1.3959	-2.3147	-1.3292	-1.5023	-1.6758	-1.4035	-1.7515	-1.9942	-1.1203	-1.1617	-1.4035	-2.2447	-2.035	-1.3111	-1.5023	-1.3147	-2.0529	-1.9159	-0.9159	-0.3865	-1.191	-1.038	-1.0801	-1.4228	-1.458	-1.6171	-1.2863	-1.6349	-1.9214	-2.035	-1.0116	-0.949	-1.8262	-1.0589	-1.5951
DARC	0.5955	0.119	1.0201	1.9373	0.9928	1.6285	0.6754	1.1667	1.5945	2.3294	0.9493	-0.5778	0.0538	0.3818	0.8758	1.4813	1.067	0.6397	-0.8704	1.4195	0.9486	-0.2026	0.0949	-0.5735	2.3752	0.0922	1.84	1.0151	1.025	1.9317	0.4136	-0.7959	1.0875	-0.6506	1.6586	1.0793	0.9993	1.2363	1.3679	0.3208	0.9069	0.7664	2.0426	1.6535	1.9142	1.3763	0.9686	0.7816	1.3612
LRRC8B	-1.0058	-0.7322	-0.0755	-0.0469	-0.4247	-0.486	-0.7637	-1.0862	0.9358	-0.8625	-0.7859	0.433	-0.4759	-0.9658	-0.8678	-1.191	-0.1844	-0.4501	-0.7884	-0.9379	0.4212	-1.0145	-0.5522	-0.8262	-0.2934	-0.737	-0.46	-0.0862	-0.6506	-0.2294	-1.0923	0.1283	-0.2916	-0.2226	-0.5416	-0.394	-0.7202	-1.415	-0.1894	-1.3364	-0.5084	-1.3884	-0.2076	-1.1329	-0.4055	-0.0425	-0.2515	-0.3603	-0.811
NGFB	0.7181	1.1712	-0.7418	0.2363	-0.4112	-0.1536	0.5341	0.6617	-0.274	-0.9771	-0.3076	0.7832	-0.6416	1.5445	0.1336	0.7303	1.5806	0.6627	0.1322	-2.1976	-0.4639	0.7424	0.3068	-1.152	-0.1861	0.1204	-0.4679	0.5039	0.2833	0.7004	-0.0014	-0.7859	-0.8135	-0.6943	-0.1392	-1.0954	0.0854	0.3973	0.4988	0.3818	1.0328	-0.3808	0.2497	0.1519	-0.0291	1.3763	-2.0174	-1.771	-0.5778
FCRL4	2.7717	NA	0.473	1.0676	1.6168	NA	3.4383	0.224	NA	2.9356	NA	1.3471	0.8197	3.488	NA	1.2388	NA	2.5208	NA	NA	0.2497	3.2854	NA	-0.5735	0.6645	1.2418	5.408	NA	2.7146	0.5008	3.6702	0.6088	0.0029	NA	1.7216	0.472	NA	NA	2.6765	3.1045	2.8548	0.622	1.1648	NA	0.2928	NA	NA	0.3874	1.1084
CRNN	-0.3677	0.539	0.0356	-0.699	-1.1552	-0.0058	-0.963	0.0772	-0.1633	-0.692	-1.4228	-0.331	0.0158	-0.3978	0.0129	-0.1633	0.2054	-1.2828	0.5331	-0.9658	-1.2828	0.4957	0.4823	-0.6943	NA	-0.692	NA	-0.3846	0.2916	-1.6171	NA	-1.0559	-0.1665	-1.2142	-1.1203	0.9084	-0.0101	0.2975	-1.811	-0.692	-0.9434	0.3763	-1.0589	0.763	0.0772	-0.5778	-1.5522	-0.4247	-1.4941
VPS72	-0.7013	-0.4901	0.4093	0.0384	-0.484	0.0314	-0.5228	-0.3677	0.5578	-0.4739	-0.3808	0.0412	-0.4719	-0.3978	-0.7637	0.0412	0.0158	-0.1392	-0.8034	-0.5973	-0.5713	-0.4739	-0.0439	0.0412	-0.0247	-1.0029	-0.5228	-0.6259	-0.1795	-0.1376	-1.152	-0.9546	-0.771	-0.7108	-0.7834	-0.3474	0.2091	0.1309	-0.7108	0.2179	-0.8288	-0.7934	-1.0679	-0.3529	-0.1617	-0.243	-0.3237	-0.7784	-1.0619
HAX1	-0.9187	-0.6943	0.2928	-0.1993	-0.1016	-0.4759	-0.5353	-0.1156	0.0101	-0.5228	-0.6237	-0.46	-0.6439	-0.5312	-0.8365	-0.7563	-0.5973	0.0426	-0.7037	-1.1361	-0.7298	-0.4921	-0.46	0.24	-0.5799	-0.1313	-0.071	-0.1376	-0.6148	-0.6552	-0.5522	-0.3165	-0.7515	-0.7155	-0.5735	-0.1681	-0.3419	0.5878	-0.4739	0.3161	0.1427	-0.1424	-0.394	-0.0277	-0.3401	-0.1078	0.3807	-0.3921	-0.7131
FCN3	3.3827	3.189	4.0807	4.6927	4.0644	2.8856	4.4128	4.842	2.5859	4.855	4.1359	2.669	2.0946	4.5638	5.3023	2.1299	3.4074	3.2962	2.0458	4.1135	3.5692	2.1253	2.0531	4.765	4.4673	3.0846	5.0566	2.3488	4.1683	4.8278	3.6938	2.2753	3.9561	4.4229	3.8166	3.0568	3.6599	4.2765	5.1526	3.8826	4.8369	3.4751	2.1969	2.7379	4.9841	3.4944	3.4168	2.4209	3.2885
AGT	0.3807	0.0854	3.5558	0.1545	-0.9324	1.4626	0.7433	0.4436	-0.1313	1.0377	0.1635	1.3511	0.3696	-0.1408	0.5499	-0.1877	1.9891	0.3651	-1.8059	1.5835	-1.6574	-1.6349	-0.7202	-2.2243	2.8748	0.5869	2.601	-2.1584	-1.0589	-0.0529	-0.1424	-2.1976	-0.8625	0.9169	-0.5564	1.2992	1.0036	1.0807	-1.3401	-1.9214	-1.3959	1.1257	3.2651	-0.2109	1.8379	-3.4235	4.0356	1.9993	1.3746
BCL10	0.3045	-0.4208	0.2191	1.3254	1.3578	0.8456	0.6599	1.1368	0.0663	0.1427	0.3426	0.1801	0.5301	0.1596	0.6599	0.6535	-0.3401	1.1043	0.5617	1.1718	0.5241	-0.1376	-0.1266	-0.3585	0.1878	0.2473	0.4573	0.8616	0.6654	0.9627	1.5008	1.2339	0.1699	-0.3292	0.0496	0.2029	-0.1456	0.2203	0.473	0.1017	0.6098	0.251	0.1557	-0.776	0.6425	-0.1488	0.9538	0.6663	0.5361
TOR3A	0.0314	-0.3548	0.519	0.7966	0.679	-0.1016	-0.1746	0.0172	0.5675	0.099	-0.4461	0.2302	-0.1313	0.2666	-0.243	0.2302	0.2154	0.0144	-0.7884	-0.1568	-0.5458	0.844	-1.2515	-0.4961	0.5271	-0.3603	0.1557	-0.2294	0.7723	0.6211	0.5261	-0.8009	-0.46	-0.5907	-0.1504	0.2141	0.1414	0.338	-0.1649	0.0342	0.2582	0.4688	-0.2042	0.2327	0.541	0.0129	-0.4074	-0.0087	-0.255
AHDC1	0.9396	1.005	1.1616	2.5276	1.1447	1.674	2.105	1.2552	0.9605	0.2833	1.338	1.0793	1.9111	1.3505	1.2179	1.5395	0.9252	0.929	1.2497	2.3389	1.4049	0.7545	2.2088	0.3573	0.9561	1.3477	1.3702	0.9366	1.6369	0.4657	0.8805	1.4988	0.5714	1.0496	1.3707	0.5859	1.0607	2.1982	1.4276	-0.0058	0.9366	1.6866	1.3516	1.4751	1.5936	0.8367	2.0328	2.1875	0.6599
LGTN	-1.1746	-0.8678	-0.5105	-1.4074	-0.7884	-0.685	-1.074	-0.963	-0.1408	-1.1746	-1.041	-1.0923	-1.3511	-1.3292	-1.3401	-1.0954	-0.5187	-0.6529	-0.16	-1.2447	-0.7346	-0.6967	-1.4461	-0.5353	-0.2498	-1.0923	-0.3733	-0.5416	-1.035	-0.4941	-1.7084	-1.2042	-0.3292	-0.5479	-1.4189	0.107	-0.7784	-0.7466	-0.5692	-1.0831	-0.8237	-1.4074	-1.0831	-0.6666	-0.6643	-0.6506	-0.6371	-1.2619	-1.6439
AKR7A2	-1.0559	-0.7108	-0.8059	-0.5228	-0.9434	-1.2481	-0.9105	-0.6104	-0.2533	-0.7298	-0.9379	-0.7563	-0.6506	-1.071	-1.152	-0.6038	-0.3292	-0.7686	-1.2793	-0.9971	-1.0499	-1.2653	-1.3219	-0.7735	-0.152	-1.5606	-0.9159	-1.0923	-0.7346	-0.2969	-1.1078	-0.5105	-0.2793	-1.0145	-0.8494	-0.7984	-1.1681	-1.482	-1.415	-1.4189	-1.3364	-0.963	-0.9828	-0.4247	-0.662	-0.5995	-1.8314	-0.9406	-0.8997
CMPK	-0.0203	0.4114	0.2892	0.7198	1.0158	0.1635	0.818	0.7974	0.9313	0.6378	0.1296	0.0215	-0.0247	-0.2126	0.3741	0.2666	0.4308	0.2582	-0.097	-0.1697	1.9642	0.4709	-0.4325	0.519	0.5281	0.9986	-0.0247	0.8082	0.2339	0.5936	0.0454	1.0482	0.5241	0.7647	0.269	1.7442	-0.488	-1.2042	0.6397	-0.0145	0.5558	0.7908	1.2945	0.3219	0.4383	0.0058	0.2265	1.0996	0.2203
HIST2H3A	0.0524	-0.3292	0.1941	0.1454	-0.3902	1.2345	-0.0954	0.2314	0.6443	0.5734	0.2881	0.044	0.2987	-0.2396	-0.4035	-0.0893	1.1493	0.2079	-0.6781	-0.0277	0.4813	0.0412	0.518	0.0342	0.6443	0.0731	-0.3846	-0.1976	-0.1078	0.8351	-0.9187	-0.5479	0.5821	-0.5437	-0.1297	0.175	0.4803	0.0676	-0.1266	0.8655	0.1097	0.0538	0.474	0.6672	0.0272	0.373	-0.6666	-0.0499	-0.0985
GSTM1	-1.771	-3.2515	-0.4639	-1.2142	-0.0559	-3.1203	-2.5649	-1.5995	-2.2863	-1.5735	-1.1811	-2.3959	-2.4901	-2.6529	-1.4383	-2.8783	-1.7661	-3.2243	-1.5064	-1.949	-2.5146	-1.482	-0.1665	-0.5458	-0.9971	-2.3219	-1.4422	-1.2481	-0.281	-1.0985	-0.3677	-2.0893	-2.1844	0.0356	-1.4739	-1.4305	-1.1109	-3.1203	-1.7131	-2.5312	-2.1266	-3.4266	-1.0058	-2.4189	-1.2934	-1.5105	-2.1329	-0.331	-1.2688
RGL1	2.948	3.2443	3.841	3.3334	3.4396	3.9326	3.8669	3.1447	2.9574	3.1752	3.3992	3.3978	3.1347	3.0181	4.4148	1.926	3.1139	2.7634	2.8373	3.9644	2.6976	3.0002	3.7323	3.7866	2.9165	2.3063	3.0056	3.0421	3.3306	3.2931	2.971	3.3491	3.585	2.5175	4.1827	3.4436	3.9107	3.3031	2.8252	2.9955	2.6749	2.6699	3.5777	3.8217	3.2399	2.2594	1.9452	3.4957	3.3448
FUCA1	3.169	2.8498	2.2138	3.3134	3.3519	1.263	2.9572	2.3448	3.6147	2.7238	2.9809	2.2866	2.5195	2.9046	3.5922	1.3098	4.1787	2.3196	1.9407	3.1757	2.1023	2.5629	1.7723	2.6276	4.0206	1.1718	3.2726	2.3887	2.6597	3.4182	2.0151	3.1238	3.036	2.0807	2.6769	3.213	2.7512	2.9117	2.8001	2.0851	2.7824	2.8189	4.0383	4.0764	2.5403	2.8951	2.4141	3.2015	3.84
TNFSF18	NA	NA	NA	-0.2447	NA	0.2916	-0.4442	NA	0.5558	-0.2863	NA	-1.152	NA	-1.9942	NA	NA	-0.5228	NA	NA	NA	NA	0.4071	NA	0.7774	NA	NA	NA	-0.2898	NA	NA	NA	NA	NA	NA	NA	NA	NA	NA	0.4626	0.144	NA	NA	NA	NA	NA	NA	NA	NA	-1.3771
RPL22	-0.6304	-0.3733	-0.4779	-0.4779	-0.8997	-0.1456	0.1124	-0.3437	0.0963	-0.243	0.148	-0.8211	-0.852	-0.226	-0.5821	-0.4501	-0.364	-1.3771	-0.4442	-0.7515	-0.1234	-0.3058	-0.2345	-0.1943	-0.2076	0.0086	0.2351	-0.3978	-0.1633	-0.0755	-0.4442	-0.9351	0.0468	0.2654	0.0663	0.3208	-1.0559	-0.8546	1.144	-0.9462	0.1017	-0.771	0.0854	-0.1313	-0.2706	-0.6643	-0.6461	-0.5291	-0.3752
S100A5	0.4782	1.2576	0.0243	0.844	1.1388	1.125	1.2123	1.232	0.0243	-0.5973	1.2564	0.3242	0.5685	1.406	1.7018	2.2561	-0.2533	0.8679	1.2296	1.4044	0.6388	0.4319	1.7562	-0.5479	0.538	1.4228	1.2839	0.7111	0.7553	0.0482	0.9336	1.5641	0.1801	-0.2379	1.229	0.0827	0.9694	1.8032	0.4265	0.3663	1.1903	1.1953	0.517	0.6276	0.763	0.6627	1.3369	0.9222	-0.2396
PADI1	2.4198	NA	NA	0.2726	NA	0.0043	-1.7322	-0.706	1.8278	NA	NA	1.159	-0.5187	0.0058	0.5666	0.4287	2.4581	1.4054	-0.5692	0.6978	0.6853	-0.4941	-1.2109	NA	0.7163	-0.706	NA	NA	NA	0.9084	NA	NA	-0.7108	NA	NA	NA	0.8229	-1.486	-0.5395	NA	NA	2.2333	NA	-0.9799	NA	NA	NA	NA	NA
UBE2T	-2.2653	-3.776	-0.7959	-1.0439	-1.5353	-0.9269	-2.8997	-3.2793	-1.3076	-3.071	-2.6897	-0.48	-1.486	-2.6439	-2.9658	-0.7809	-3.1456	-0.6038	-1.7515	-2.776	-3.4173	-2.8997	-0.1552	-3.3718	-2.776	-0.4422	0.0014	-1.9942	-1.7131	-4.1923	-1.4779	-3.035	-3.1714	-2.8262	-3.1976	-3.2243	-1.6666	-1.5649	-2.6712	-2.0589	-1.6712	-0.9105	-2.5395	-2.4501	-2.6804	-1.041	-0.9799	-1.038	-2
VASH2	-0.3585	-1.6349	0.9738	0.6835	0.037	0.516	1.0201	-0.5606	-0.6967	-0.6394	-0.7834	0.3369	-0.1763	0.5898	-0.5606	-0.152	-0.3492	-0.6529	-0.4961	0.4265	-1.3696	-0.1408	1.6911	-1.2688	-1.3846	-0.0425	0.5578	-0.3659	0.5499	-1.5995	-0.144	-1.3921	-0.9574	-0.8084	0.1827	-0.811	-0.415	-0.1472	-0.2916	0.5859	0.1738	0.4212	-0.3022	-1.255	0.7493	-0.8186	0.8383	-0.0862	0.4319
LCE3D	0.1738	0.8844	-0.4699	0.4834	1.1309	1.2327	2.0786	2.4865	1.2606	-0.3346	1.5281	1.189	0.8488	1.1322	1.2054	1.278	0.7163	0.3651	0.3045	0.45	0.4255	-0.0336	0.7908	1.1427	-1.3401	1.8339	NA	0.4977	0.229	-0.5043	0.2116	0.2987	0.3606	0.6781	0.9092	0.1137	0.45	0.3138	0.2265	0.9942	0.3785	-0.16	0.8647	0.1493	0.7084	0.6443	-0.5043	0.6772	0.3629
JMJD4	-1.0529	-1.0087	0.0384	-0.7515	-0.8546	0.0881	-1.2042	-0.9379	-0.662	-0.7984	-1.4112	-0.5208	-1.2898	-1.1488	-1.038	-0.3548	-0.9132	-0.4208	-1.5146	-1.2109	-1.2723	-0.7637	-0.7346	-1.041	-0.8494	-1.0203	-1.3004	-1.2142	-1.2109	-0.9132	-0.6689	-1.0321	-1.1424	-1.5907	-1.0262	-1.114	-0.4325	-0.1844	-1.3511	-0.191	-0.527	-0.8704	-1.2619	-0.8468	-0.7274	-0.3022	-0.1424	-0.8678	-0.9574
KIAA0319L	0.3874	0.5917	1.2702	0.6699	1.742	0.4457	1.0108	0.8718	0.7433	0.4158	1.2887	0.6772	0.2738	0.5341	0.0649	-0.2413	0.8082	0.6135	0.4947	0.6871	2.4813	0.2179	0.1622	1.051	0.7866	-0.6873	-0.0203	1.3907	0.2833	1.0628	-0.1313	1.3918	1.2714	1.3057	0.0426	1.1583	0.5695	0.5965	0.5656	0.0342	0.3103	0.2963	0.8671	1.232	1.2308	0.1827	-0.1649	-0.0559	-0.2311
OR2C3	NA	NA	NA	NA	NA	NA	NA	NA	NA	NA	NA	NA	NA	NA	NA	NA	NA	NA	NA	NA	-2.5479	NA	NA	NA	NA	NA	NA	NA	NA	NA	NA	NA	-0.0014	NA	NA	NA	NA	-0.6897	NA	NA	NA	NA	NA	NA	NA	NA	NA	NA	NA
TMEM58	0.148	-0.0831	0.8106	0.2774	-0.1376	-0.5332	0.3426	0.4626	-0.1016	0.2412	0.4297	0.1852	0.4885	0.2975	0.3807	0.7329	-0.0262	-0.692	0.2339	0.5743	-0.2059	0.2253	0.229	0.4265	0.5509	0.2154	-0.0395	0.926	-0.0908	-0.1894	0.0328	0.2881	0.037	-0.0786	0.2892	0.148	0.5341	1.0475	-0.114	-0.0058	0.0854	-0.2464	0.0745	0.3818	1.2696	-0.2142	0.9146	0.4885	0.0663
ANKRD26	-0.482	-0.8836	-0.3292	-0.4093	-0.5249	0.965	-0.6689	-0.2653	0.4584	-0.4521	-0.0058	-0.1488	-0.1844	0.2928	-0.1456	-0.771	-0.2987	-0.2498	0.6906	0.5221	0.2253	-0.0043	0.2738	0.2029	0.0566	0.7347	1.1023	0.5331	-0.1681	-0.4325	0.0229	-0.1203	-0.0679	-1.2176	-0.6735	-0.3978	-0.4016	-0.1894	-0.4639	-0.2362	-0.2294	-0.1844	0.1043	-0.3808	-0.5778	0.5211	0.6717	0.3962	0.051
ARHGAP21	0.5028	0.5271	0.6471	0.2702	0.3115	0.9855	0.5059	1.1197	-0.0619	0.5917	0.512	-0.2688	0.0243	0.189	0.4415	0.8836	0.5301	0.4457	-0.2934	0.8496	0.0115	0.3369	-0.5353	0.224	0.4233	0.0881	-0.3147	0.3618	0.3962	0.9456	1.1401	0.6627	0.0454	-1.1424	0.3618	-0.1714	0.4709	0.0482	-0.2159	0.2606	0.6012	0.6754	0.7031	0.107	0.3918	-0.0174	0.6772	0.8456	1.4011
DNMT2	-1.5907	-0.963	-0.6827	-1.4501	-1.1649	-1.9269	-0.1779	-1.9714	-0.7131	-0.6304	-1.3147	-0.8365	-2.1779	-2.5228	-1.2176	-2.9658	-1.527	-0.9856	-1.8417	-1.482	-1.6126	-1.6126	-1.4901	-0.9942	-0.8599	-1.2934	0.6627	-1.2379	-1.4501	-2.1329	-0.5002	-1.5564	-1.6529	-1.7322	-1.699	-1.6349	-1.889	-1.3364	-1.5864	-2.7084	-0.873	-1.3659	-1.6804	-0.9885	-1.4422	-1.1584	-1.685	-0.6804	-0.725
KIAA0494	1.0566	1.3533	0.9833	1.3735	1.8363	0.7562	1.7668	1.9601	1.0328	0.2606	1.8367	0.5231	1.0635	1.3179	1.45	0.6452	1.0779	1.6392	2.0707	1.736	2.1728	1.2296	1.1355	0.6079	0.886	0.6554	1.6857	1.9027	1.6285	1.3167	1.5588	0.4823	1.6897	1.1263	1.3945	2.0635	1.0065	1.1935	1.5465	0.7824	1.3351	1.4049	1.5484	1.0356	2.103	0.2845	1.099	1.2845	1.2185
CUGBP2	2.4214	2.7508	2.2376	2.2434	1.1322	0.9657	2.0979	1.1349	2.3068	2.8396	2.4576	2.568	2.0426	1.7035	1.9775	0.8875	2.8022	1.585	1.8319	1.4652	2.8014	2.2129	-3.0233	2.9283	2.5895	2.568	3.3102	3.1194	1.9895	2.6835	1.3033	1.1506	3.1979	2.5026	1.6938	2.7119	1.903	1.3022	3.1069	2.0335	3.2599	0.8867	2.7968	2.4217	1.4725	2.8687	1.4885	1.3994	2.5695
SFTPA1	5.4202	4.9635	2.986	4.5466	3.9828	1.5261	4.4476	5.2731	4.2698	4.5122	4.8364	1.4942	3.8022	4.3234	5.8885	1.52	3.6938	4.2728	5.288	2.8088	3.729	4.135	1.2708	4.5361	4.0925	5.2713	4.8992	4.9279	2.6348	4.3533	2.9601	3.5336	4.8334	4.3903	4.7981	4.8079	3.9021	4.9995	5.1926	2.2428	4.8826	4.257	2.4106	4.7666	4.5103	4.5423	5.1583	3.5173	4.8909
HPS6	-0.7226	-0.4364	-0.5312	-1.0262	-0.6529	-1.2243	-1.1649	-0.7735	-0.9406	-0.041	-0.6304	-0.8339	-0.706	-1.0679	-0.4779	-0.1001	-0.897	-0.5821	-0.5437	-1.0801	-0.3437	-0.9132	-0.6082	-0.1472	-0.706	-1.0116	-0.9406	-0.7563	-0.5951	-0.6461	-0.8836	-0.1094	-0.4901	-1.5479	-0.9942	-1.1109	-0.5084	-1.1584	-0.3978	-0.7274	-0.6804	-1.1109	-0.9602	-0.6349	-0.5907	-1.1297	-0.6552	-0.949	-0.8237
[truncated: 17,731 more rows]
[truncated: 68 more columns]

## Sheet: Clinical data
	event	time	age	sex
AD001	1	1326	71	M
[truncated: 116 more rows]
